# Supplementary material
Source: PubMed Central journal article supplement (PMC3858665)
Supplement: supp_me.2011-1258_ME-11-1258_tabx5.pdf [file supp_me.2011-1258_ME-11-1258_tabx5.pdf]

## Supplemental Tables:

- Supplemental Table S1. Phosphosites which exhibit increased phosphorylation after GH treatment.
- Supplemental Table S2. Phosphosites which exhibit decreased phosphorylation after GH treatment.
- Supplemental Table S3. Phosphoproteomics data from the first 5 min GH treatment experiment.
- Supplemental Table S4. Phosphoproteomics data from the second 5 min GH treatment experiment.
- Supplemental Table S5. Phosphoproteomics data from the 15 min GH treatment experiment.

The data sets generated by this project may be accessed from the Tranche data repository ([www.proteomecommons.org](http://www.proteomecommons.org): under 'browse data', search for 'Carter-Su C').

The Hash codes for the data sets are:

1) MSMS peak lists:

VkNbKTbCv4khOExPkFJqN+Tb3O3Xm0eAmylXmQTRwKN5zJRUX34Ozs  
w5fjPn0+T2TATDyp/rYMvALluT+LEbhE/TVtQAAAAAAAAALTw==

2) RAW data files:

d3O/sgIU9t9fDTFC2GDO9YJ05Gh5bBo1SYxT7BtQJ1xd79X07CphAHIEIK  
xgx6s03WWzHfEcc7WcNtdFmZswh7EwqHkAAAAAAB/dQ==

| Supplemental Table S1. Phosphosites which exhibit increased phosphorylation after GH treatment. |                                                         |                                                   |                   |                                         |                    |        |                         |                                              |                                                                                |
|-------------------------------------------------------------------------------------------------|---------------------------------------------------------|---------------------------------------------------|-------------------|-----------------------------------------|--------------------|--------|-------------------------|----------------------------------------------|--------------------------------------------------------------------------------|
| Gene Name                                                                                       | Protein Name                                            | Phosphosite <sup>1</sup>                          | # of phosphosites | Normalized ratio (+GH/-GH) <sup>2</sup> |                    |        |                         | Function of phosphosite                      | Function of protein <sup>4</sup>                                               |
|                                                                                                 |                                                         |                                                   |                   | 5 min <sup>a</sup>                      | 5 min <sup>b</sup> | 15 min | Max. ratio <sup>3</sup> |                                              |                                                                                |
| 9-Sep                                                                                           | Septin 9                                                | [Ser41 =Thr42]                                    | 1                 | [1.4]                                   | -                  | -      | 1.4                     | Unknown                                      | Cytoskeleton, binds cytoskeleton, cytokinesis, exocytosis, GTP binding protein |
| 6330577E15 Ri                                                                                   | Uncharacterized protein C10 of 78 homolog               | [Thr70 =Ser71]                                    | 1                 | -                                       | -                  | [1.5]  | 1.5                     | Unknown                                      | Unknown                                                                        |
| Acin1                                                                                           | Apoptotic chromatin condensation inducer in the nucleus | Ser710                                            | 1                 | -                                       | 1.8                | -      | 1.8                     | Unknown                                      | Apoptosis, chromatin condensation                                              |
| Acly                                                                                            | ATP-citrate lyase                                       | Ser455                                            | 1                 | 1.5                                     | -                  | -      | 1.5                     | Increases catalytic activity (1)             | Metabolic process, acetyl-CoA synthesis, lipid synthesis                       |
| Ahnak                                                                                           | AHNAK nucleoprotein 1                                   | [Ser5557 >Ser5566 =Thr5567]                       | 1                 | [2.1]                                   | -                  | -      | 2.1                     | Unknown                                      | Cytoskeleton                                                                   |
| Ahnak                                                                                           | AHNAK nucleoprotein 1                                   | [Thr5569 >Thr5567 >Thr5571 >Ser5555 >Ser5566]     | 2                 | [2.5]                                   | -                  | -      | 2.5                     | Unknown                                      | Cytoskeleton                                                                   |
| Ahnak                                                                                           | Ahnak                                                   | Ser136                                            | 1                 | 3.4                                     | 4.5                | 5.2    | 5.2                     | Unknown                                      | Cytoskeleton                                                                   |
| Ahnak                                                                                           | Ahnak                                                   | Ser217                                            | 1                 | -                                       | -                  | 2.4    | 2.4                     | Unknown                                      | Cytoskeleton                                                                   |
| Ahnak                                                                                           | Ahnak                                                   | Ser4890                                           | 1                 | 2.2                                     | 2.5                | 3.7    | 3.7                     | Unknown                                      | Cytoskeleton                                                                   |
| Ahnak2                                                                                          | AHNAK nucleoprotein 2                                   | Ser652                                            | 1                 | -                                       | 2.4                | -      | 2.4                     | Unknown                                      | Cytoskeleton                                                                   |
| Akap1                                                                                           | A-kinase anchor protein 1, mitochondrial                | Ser109 - isoforms 1,3,5,6 (Ser142 - isoforms 2,4) | 1                 | 1.5                                     | -                  | -      | 1.5                     | Unknown                                      | Adaptor                                                                        |
| Akap2                                                                                           | A-kinase anchor protein 2                               | [Thr738 >Ser740] [(Thr982 >Ser984)]               | 1                 | -                                       | [2.2]              | -      | 2.2                     | Unknown                                      | Adaptor                                                                        |
| Akap2                                                                                           | A kinase anchor protein 2                               | Ser740 (Ser984)                                   | 1                 | -                                       | 1.9                | 1.6    | 1.9                     | Unknown                                      | Adaptor                                                                        |
| Akt1s1                                                                                          | Proline-rich AKT1 substrate 1 (PRAS40)                  | Ser184 (Ser255)                                   | 1                 | -                                       | 2.2                | 3.9    | 3.9                     | Regulates PRAS40 interaction with raptor (2) | Apoptosis, mTORC1 complex                                                      |
| Akt1s1                                                                                          | Proline-rich AKT1 substrate 1 (PRAS40)                  | Thr247 (Thr318)                                   | 1                 | 3.8                                     | -                  | -      | 3.8                     | Prevents PRAS40 inhibition of mTORC1 (3)     | Apoptosis, mTORC1 complex                                                      |
| Arfgap2                                                                                         | ADP-ribosylation factor GTPase-activating protein 2     | Ser145                                            | 1                 | -                                       | 1.7                | -      | 1.7                     | Unknown                                      | GAP                                                                            |
| Atp6v0a2                                                                                        | V-type proton ATPase 116 kDa subunit a isoform 2        | Ser695                                            | 1                 | 1.4                                     | -                  | -      | 1.4                     | Unknown                                      | Endosomal pH sensing                                                           |

| Gene Name      | Protein Name                                                                     | Phosphosite <sup>1</sup>                      | # of phosphosites | Normalized ratio (+GH/-GH) <sup>2</sup> |                    |                  |                         | Function of phosphosite                                          | Function of protein <sup>4</sup>                                                                                |
|----------------|----------------------------------------------------------------------------------|-----------------------------------------------|-------------------|-----------------------------------------|--------------------|------------------|-------------------------|------------------------------------------------------------------|-----------------------------------------------------------------------------------------------------------------|
|                |                                                                                  |                                               |                   | 5 min <sup>a</sup>                      | 5 min <sup>b</sup> | 15 min           | Max. ratio <sup>3</sup> |                                                                  |                                                                                                                 |
| Bat2           | Large proline-rich protein BAT2                                                  | Ser761                                        | 1                 | -                                       | 1.5                | -                | 1.5                     | Unknown                                                          | mRNA processing, RNA splicing                                                                                   |
| Bckdha         | Branched chain ketoacid dehydrogenase E1, alpha polypeptide                      | Ser334 (Ser338)                               | 1                 | 1.6                                     | 1.0 <sup>s</sup>   | -                | 1.6                     | Unknown                                                          | Metabolic process, leucine oxidation, (maple syrup urine disease <sup>5</sup> )                                 |
| Bcl9l          | B-cell CLL/lymphoma 9-like protein                                               | [Ser116 >Ser118]                              | 1                 | -                                       | [2.8]              | -                | 2.8                     | Unknown                                                          | Transcription, interacts with $\beta$ -catenin, nuclear import                                                  |
| Bcl9l          | B-cell CLL/lymphoma 9-like protein                                               | Ser118                                        | 1                 | -                                       | 2.4                | -                | 2.4                     | Unknown                                                          | Transcription, interacts with $\beta$ -catenin, nuclear import                                                  |
| Bclaf1         | Bcl-2-associated transcription factor 1                                          | Ser383                                        | 1                 | 1.6                                     | 1.3 <sup>s</sup>   | 1.0 <sup>s</sup> | 1.6                     | Unknown                                                          | Transcription, transcription factor, apoptosis,                                                                 |
| Cad            | Carbamoyl-phosphate synthetase 2, aspartate transcarbamylase, and dihydroorotase | Ser1859                                       | 1                 | -                                       | 1.9                | -                | 1.9                     | Unknown                                                          | Metabolic process, pyrimidine synthesis                                                                         |
| Cast           | Calpastatin                                                                      | Ser219                                        | 1                 | -                                       | 1.5                | -                | 1.5                     | Unknown                                                          | Protease inhibitor, inhibits calpain                                                                            |
| Cbx5           | Chromobox protein homolog 5                                                      | Ser95 (Ser93)                                 | 1                 | -                                       | 2.0                | -                | 2.0                     | Unknown                                                          | Transcription, interacts with methylated histone H3, epigenic repression                                        |
| Cd2ap          | CD2-associated protein                                                           | Ser458                                        | 1                 | -                                       | 1.5                | -                | 1.5                     | Unknown                                                          | Adaptor, cytoskeleton, cell migration, filtration in kidney, (focal segmental glomerulosclerosis <sup>5</sup> ) |
| Cic            | Protein capicua homolog                                                          | [Ser2280 >Thr2283 =Ser2284 >Ser2275 =Thr2277] | 2                 | [1.4]                                   | -                  | -                | 1.4                     | Unknown                                                          | Transcription                                                                                                   |
| D930048N14 Rik | Novel protein                                                                    | Thr15                                         | 1                 | -                                       | 4.1                | -                | 4.1                     | Unknown                                                          | Unknown                                                                                                         |
| Dact3          | Dapper homolog 3                                                                 | Ser409                                        | 1                 | 2.2                                     | -                  | -                | 2.2                     | Unknown                                                          | Antagonist of $\beta$ -catenin                                                                                  |
| Dap            | Death-associated protein 1                                                       | Thr56                                         | 1                 | -                                       | 22                 | -                | 22                      | Unknown                                                          | Autophagy, negatively regulates autophagy, apoptosis, inhibition of NF- $\kappa$ B transcription factor         |
| Dcaf8          | DDB1- and CUL4-associated factor 8; Wdr42a                                       | Ser123, Ser124                                | 2                 | 1.5                                     | -                  | -                | 1.5                     | Unknown                                                          | Ubiquitin, ubiquitination                                                                                       |
| Dpysl3         | Collapsin response mediator protein 4A isoform 3                                 | Ser101                                        | 1                 | -                                       | 1.7                | -                | 1.7                     | Unknown                                                          | Cytoskeleton, cytoskeletal remodeling, axon guidance                                                            |
| Eif4b          | Eukaryotic translation initiation factor 4B                                      | [Thr420 >Ser422]                              | 1                 | -                                       | [3.1]              | -                | 3.1                     | Increases interaction Eif4b with Eif3 (4) and Eif4b activity (5) | Translation, binding mRNA to ribosomes                                                                          |

| Gene Name | Protein Name                                            | Phosphosite <sup>1</sup>         | # of phosphosites | Normalized ratio (+GH/-GH) <sup>2</sup> |                    |        |                         | Function of phosphosite                                                                | Function of protein <sup>4</sup>                                                         |
|-----------|---------------------------------------------------------|----------------------------------|-------------------|-----------------------------------------|--------------------|--------|-------------------------|----------------------------------------------------------------------------------------|------------------------------------------------------------------------------------------|
|           |                                                         |                                  |                   | 5 min <sup>a</sup>                      | 5 min <sup>b</sup> | 15 min | Max. ratio <sup>3</sup> |                                                                                        |                                                                                          |
| Finc      | Filamin-C                                               | Ser2234                          | 1                 | 3.3                                     | 2.3                | 1.7    | 3.3                     | Unknown                                                                                | Cytoskeleton                                                                             |
| Fnbp11    | Formin-binding protein 1-like                           | Ser295                           | 1                 | -                                       | 2.5                | -      | 2.5                     | Unknown                                                                                | Adaptor, promotes CDC42-induced actin polymeration, membrane invagination and tubulation |
| Frs2      | Fibroblast growth factor receptor substrate 2           | Thr326                           | 1                 | 1.8                                     | -                  | -      | 1.8                     | Unknown                                                                                | Adaptor, ras/MAPK pathway, cell proliferation, organ development                         |
| Gm15128   | Novel protein similar to ovary testis transcribed (Ott) | Ser384, Ser388                   | 2                 | -                                       | 1.5                | -      | 1.5                     | Unknown                                                                                | Unknown                                                                                  |
| Gsta3     | Glutathione S-transferase A3                            | Thr68, Tyr74                     | 2                 | -                                       | -                  | 1.7    | 1.7                     | Unknown                                                                                | Metabolic process                                                                        |
| Hmgn1     | Non-histone chromosomal protein HMG-14                  | [Thr70 =Thr71 >Ser84 =Ser87]     | 2                 | -                                       | [1.6]              | -      | 1.6                     | Unknown                                                                                | DNA binding, chromatin architecture                                                      |
| Irf2bp2   | interferon regulatory factor 2 binding protein 2        | Ser421                           | 1                 | 2.2                                     | -                  | -      | 2.2                     | Unknown                                                                                | Transcription, repressor                                                                 |
| Irs2      | Insulin receptor substrate 2                            | Ser556                           | 1                 | -                                       | 1.5                | -      | 1.5                     | Unknown                                                                                | Adaptor, signal transduction                                                             |
| Itr3      | Inositol 1,4,5-trisphosphate receptor type 3            | Ser934                           | 1                 | -                                       | 1.7                | -      | 1.7                     | Unknown                                                                                | Receptor, release of intercellular Ca                                                    |
| Kif21a    | Kinesin-like protein KIF21A                             | Ser855                           | 1                 | -                                       | 2.1                | -      | 2.1                     | Unknown                                                                                | Cytoskeleton, motor protein, neuronal axon transport                                     |
| Larp7     | La-related protein 7                                    | [Thr251 >Ser253]                 | 1                 | -                                       | [1.6]              | -      | 1.6                     | Unknown                                                                                | Transcription, suppresses RNA polymerase II mediated transcription                       |
| Lima1     | LIM domain and actin-binding protein 1                  | Ser230                           | 1                 | -                                       | 1.5                | -      | 1.5                     | Unknown                                                                                | Cytoskeleton, actin binding, inhibits depolymerization of actin filaments                |
| Map1b     | Microtubule-associated protein 1B                       | Ser1793                          | 1                 | -                                       | -                  | 1.6    | 1.6                     | Unknown                                                                                | Cytoskeleton                                                                             |
| Map1b     | Microtubule-associated protein 1B                       | Ser614                           | 1                 | -                                       | -                  | 1.6    | 1.6                     | Unknown                                                                                | Cytoskeleton                                                                             |
| Mapk1     | Mitogen-activated protein kinase 1 (Erk2)               | [Thr179 >Thr183 =Tyr185 =Thr188] | 1                 | -                                       | [8.7]              | -      | 8.7                     | Function pThr179 and pThr188 unknown. pThr183 and pTyr185 required for activation (6)  | Kinase                                                                                   |
| Mapk1     | Mitogen-activated protein kinase 1 (Erk2)               | Thr183 [Tyr185 =Thr188 >Thr179]  | 2                 | 9.5                                     | -                  | -      | 9.5                     | pThr183 and pTyr185 required for activation (6). Functionp Thr188 and pThr179 unknown. | Kinase                                                                                   |
| Mapk1     | Mitogen-activated protein kinase 1 (Erk2)               | Thr183, Tyr185                   | 2                 | 11                                      | -                  | -      | 11                      | pThr183 and pTyr185 required for activation (6)                                        | Kinase                                                                                   |
| Mapk1     | Mitogen-activated protein kinase 1 (Erk2)               | Tyr185                           | 1                 | 2.4                                     | 2.4                | -      | 2.4                     | Required for kinase activation (6)                                                     | Kinase                                                                                   |

| Gene Name | Protein Name                                           | Phosphosite <sup>1</sup>                                     | # of phosphosites | Normalized ratio (+GH/-GH) <sup>2</sup> |                     |                     |                         | Function of phosphosite                                                                                | Function of protein <sup>4</sup>                                                                                                                                                          |
|-----------|--------------------------------------------------------|--------------------------------------------------------------|-------------------|-----------------------------------------|---------------------|---------------------|-------------------------|--------------------------------------------------------------------------------------------------------|-------------------------------------------------------------------------------------------------------------------------------------------------------------------------------------------|
|           |                                                        |                                                              |                   | 5 min <sup>a</sup>                      | 5 min <sup>b</sup>  | 15 min              | Max. ratio <sup>3</sup> |                                                                                                        |                                                                                                                                                                                           |
| Mapk1     | Mitogen-activated protein kinase 1 (Erk2)              | Tyr185 [Thr179 =Thr183]                                      | 2                 | 5.4                                     | -                   | -                   | 5.4                     | Function pThr179 unknown pThr183 and pTyr185 required for kinase activation (6)                        | Kinase                                                                                                                                                                                    |
| Mapk3     | Mitogen-activated protein kinase 3 (Erk1)              | [Thr208 >Tyr205]                                             | 1                 | -                                       | [3.0]               | -                   | 3.0                     | Function pThr208 unknown. pTyr205 required for activation (6)                                          | Kinase                                                                                                                                                                                    |
| Mapk3     | Mitogen-activated protein kinase 3 (Erk1)              | Thr199 [Thr203 =Tyr205]                                      | 2                 | 6.7                                     | -                   | -                   | 6.7                     | Function of pThr199 unknown. pThr203 and pTyr185 required for activation (6)                           | Kinase                                                                                                                                                                                    |
| Mapk3     | Mitogen-activated protein kinase 3 (Erk1)              | Thr208 [Thr203 >Tyr205 >Thr199]                              | 2                 | 4.8                                     | -                   | -                   | 4.8                     | Function pThr208 and pThr199 unknown, pThr203 and pTyr205 required for activation (6)                  | Kinase                                                                                                                                                                                    |
| Mapk3     | Mitogen-activated protein kinase 3 (Erk1)              | Tyr205                                                       | 1                 | 3.5                                     | 2.9                 | -                   | 3.5                     | Required for activation (6)                                                                            | Kinase                                                                                                                                                                                    |
| Matr3     | Matrin-3                                               | Ser188                                                       | 1                 | 1.7                                     | 1.8                 | -                   | 1.8                     | Unknown                                                                                                | mRNA processing, component of nuclear matrix                                                                                                                                              |
| Matr3     | Matrin-3                                               | Ser195                                                       | 1                 | -                                       | 2.0                 | -                   | 2.0                     | Unknown                                                                                                | mRNA processing, component of nuclear matrix                                                                                                                                              |
| Med19     | Mediator of RNA polymerase II transcription subunit 19 | Ser226 >Ser234 =Ser235 =Ser238 =Ser239 =Ser240 =Ser241 =S242 | 7                 | -                                       | 9.6                 | -                   | 9.6                     | Unknown                                                                                                | Transcription, mediates RNA polymerase II transcription                                                                                                                                   |
| Mia3      | Melanoma inhibitory activity protein 3                 | Ser1915                                                      | 1                 | -                                       | -                   | 1.7                 | 1.7                     | Unknown                                                                                                | Vesicle-mediated transport                                                                                                                                                                |
| Myh9      | Myosin-9                                               | [Thr1938 =Ser1942] ([Thr1939 =Ser1943])                      | 1                 | [1.4]                                   | [1.1 <sup>§</sup> ] | [1.0 <sup>§</sup> ] | 1.4                     | Unknown                                                                                                | Cytoskeleton, motor protein                                                                                                                                                               |
| Ncbp1     | Nuclear cap-binding protein subunit 1                  | Ser22                                                        | 1                 | -                                       | 2.2                 | -                   | 2.2                     | Unknown                                                                                                | Translation, RNA splicing                                                                                                                                                                 |
| Ncoa5     | Nuclear receptor coactivator 5                         | Ser29, Ser34                                                 | 2                 | -                                       | 1.6                 | -                   | 1.6                     | Unknown                                                                                                | Transcription, interacts with steroid nuclear receptors                                                                                                                                   |
| NdrG1     | Protein NDRG1                                          | Ser330                                                       | 1                 | -                                       | 1.5                 | -                   | 1.5                     | Primes NDRG1 for phosphorylation by GSK3 (7) and required for suppressive effect on NFκβ signaling (8) | Induced by hypoxia and stress, rab4a effector, interacts with p53 signaling, regulates growth and differentiation during development, (Charcot-Marie-Tooth disease type 4D <sup>5</sup> ) |
| NdrG1     | Protein NDRG1                                          | Thr328                                                       | 1                 | -                                       | 1.8                 | -                   | 1.8                     | Primes NDRG1 for phosphorylation by GSK3 (7) and required for suppressive effect on NFκβ signaling (8) | Induced by hypoxia and stress, rab4a effector, interacts with p53 signaling, regulates growth and differentiation during development, (Charcot-Marie-Tooth disease type 4D <sup>5</sup> ) |
| Nr3c1     | Glucocorticoid receptor;                               | Thr159 (Thr168)                                              | 1                 | -                                       | 1.8                 | -                   | 1.8                     | Unknown                                                                                                | Receptor, receptor for glucocorticoids, transcription factor                                                                                                                              |

| Gene Name | Protein Name                                          | Phospho-site <sup>1</sup>                                 | # of phospho-sites | Normalized ratio (+GH/-GH) <sup>2</sup> |                    |                  |                         | Function of phosphosite                       | Function of protein <sup>4</sup>                                                                                                                    |
|-----------|-------------------------------------------------------|-----------------------------------------------------------|--------------------|-----------------------------------------|--------------------|------------------|-------------------------|-----------------------------------------------|-----------------------------------------------------------------------------------------------------------------------------------------------------|
|           |                                                       |                                                           |                    | 5 min <sup>a</sup>                      | 5 min <sup>b</sup> | 15 min           | Max. ratio <sup>3</sup> |                                               |                                                                                                                                                     |
| Oxr1      | Oxidation resistance protein 1                        | Ser113 (Ser201 or 194)                                    | 1                  | 2.5                                     | 2.4                | -                | 2.5                     | Unknown                                       | Mitochondrial protein, induced by heat and oxidative stress                                                                                         |
| Oxr1      | Oxidation resistance protein 1                        | Ser114 (Ser195)                                           | 1                  | -                                       | 2.1                | -                | 2.1                     | Unknown                                       | Mitochondrial protein, induced by heat and oxidative stress                                                                                         |
| Parva     | Alpha-parvin                                          | Thr16, Ser19                                              | 2                  | -                                       | 1.5                | -                | 1.5                     | Unknown                                       | Adaptor, actin cytoskeleton, cell adhesion                                                                                                          |
| Pdcd4     | Programmed cell death protein 4                       | Ser457                                                    | 1                  | -                                       | 3.8                | -                | 3.8                     | Results in nuclear translocation of Pdcd4 (9) | Apoptosis                                                                                                                                           |
| Pdcd4     | Programmed cell death protein 4                       | Ser76                                                     | 1                  | -                                       | 3.5                | -                | 3.5                     | Mediates Pdcd4 interaction with betaTRCP (10) | Apoptosis                                                                                                                                           |
| Pgrmc1    | Membrane-associated progesterone receptor component 1 | Tyr180                                                    | 1                  | 1.4                                     | 1.3 <sup>s</sup>   | -                | 1.4                     | Unknown                                       | Receptor, receptor for progesterone                                                                                                                 |
| Phf3      | PHD finger protein 3                                  | [Ser658 >Ser660]                                          | 1                  | -                                       | [3.5]              | -                | 3.5                     | Unknown                                       | Transcription,                                                                                                                                      |
| Phldb2    | Pleckstrin homology-like domain family B member 2     | Thr468                                                    | 1                  | -                                       | 1.8                | -                | 1.8                     | Unknown                                       | Vesicle protein, interacts with filamin-C                                                                                                           |
| Pi4k2a    | Phosphatidylinositol 4-kinase type 2-alpha            | [Ser460 >Ser462]                                          | 1                  | -                                       | -                  | [2.3]            | 2.3                     | Unknown                                       | Kinase, lipid, inositol P3 pathway                                                                                                                  |
| Pkn2      | Serine/threonine-protein kinase N2                    | [Ser581 =Ser582]                                          | 1                  | -                                       | [6.7]              |                  | 6.7                     | Unknown                                       | Kinase, AGC kinase                                                                                                                                  |
| Pkn2      | Serine/threonine-protein kinase N2                    | Thr957                                                    | 1                  | -                                       |                    | 1.6              | 1.6                     | Unknown                                       | Kinase, AGC kinase                                                                                                                                  |
| Plec1     | Plectin-1                                             | [Ser4391 >Ser4392 >Ser4393] [(Ser4243 >Ser4244 >Ser4245)] | 1                  | -                                       | [2.1]              | -                | 2.1                     | Unknown                                       | Cytoskeleton, crosslinks actin, intermediate filaments, microtubules; scaffold - binds MAPK, RACK1, (epidermolysis bullosa simplex 1 <sup>5</sup> ) |
| Plec1     | Plectin-1                                             | [Thr19 >Ser21]                                            | 1                  | -                                       | -                  | [1.6]            | 1.6                     | Unknown                                       | Cytoskeleton, crosslinks actin, intermediate filaments, microtubules; scaffold - binds MAPK, RACK1, (epidermolysis bullosa simplex 1 <sup>5</sup> ) |
| Plec1     | Plectin-1                                             | Ser4393 (Ser4245)                                         | 1                  | 1.6                                     | 2.1                | 1.3 <sup>s</sup> | 2.1                     | Unknown                                       | Cytoskeleton, crosslinks actin, intermediate filaments, microtubules; scaffold - binds MAPK, RACK1, (epidermolysis bullosa simplex 1 <sup>5</sup> ) |
| Ppfbp1    | Liprin-beta-1                                         | Ser957, Ser961 (Ser992, Ser996)                           | 2                  | -                                       | 1.5                | -                | 1.5                     | Unknown                                       | Adaptor, interacts with LAR protein tyrosine phosphatases, axon guidance and mammary development                                                    |
| Ppp1r12a  | Protein phosphatase 1 regulatory subunit 12A          | [Ser870 >Ser877]                                          | 1                  | -                                       | [1.7]              | -                | 1.7                     | Unknown                                       | Phosphatase, regulates interaction of actin and myosin                                                                                              |

| Gene Name | Protein Name                                                           | Phosphosite <sup>1</sup> | # of phosphosites | Normalized ratio (+GH/-GH) <sup>2</sup> |                    |                  |                         | Function of phosphosite                                                                              | Function of protein <sup>4</sup>                                             |
|-----------|------------------------------------------------------------------------|--------------------------|-------------------|-----------------------------------------|--------------------|------------------|-------------------------|------------------------------------------------------------------------------------------------------|------------------------------------------------------------------------------|
|           |                                                                        |                          |                   | 5 min <sup>a</sup>                      | 5 min <sup>b</sup> | 15 min           | Max. ratio <sup>3</sup> |                                                                                                      |                                                                              |
| Ppp1r12a  | Protein phosphatase 1 regulatory subunit 12A                           | Ser507                   | 1                 | 6.9                                     | 8.6                | -                | 8.6                     | Unknown                                                                                              | Phosphatase, regulates interaction of actin and myosin                       |
| Ppp1r12a  | Protein phosphatase 1 regulatory subunit 12A                           | Ser509                   | 1                 | 4.0                                     | -                  | -                | 4.0                     | Unknown                                                                                              | Phosphatase, regulates interaction of actin and myosin                       |
| Ppp1r12a  | Protein phosphatase 1 regulatory subunit 12A                           | Ser861                   | 1                 | 1.5                                     | -                  | -                | 1.5                     | Unknown                                                                                              | Phosphatase, regulates interaction of actin and myosin                       |
| Ptpn2     | Protein tyrosine phosphatase, receptor type, N polypeptide 2, isoform  | Ser89                    | 1                 | -                                       | 104.9              | -                | 104.9                   | Unknown                                                                                              | Phosphatase, protein tyrosine phosphatase                                    |
| Rai14     | Ankycorbin                                                             | Ser914                   | 1                 | 1.5                                     | -                  | -                | 1.5                     | Unknown                                                                                              | Adaptor                                                                      |
| Ranbp3    | Ran-binding protein 3                                                  | Ser58                    | 1                 | -                                       | 2.5                | -                | 2.5                     | Important for nuclear export function (11)                                                           | Adaptor, nuclear export                                                      |
| Raver1    | Ribonucleoprotein PTB-binding 1                                        | Ser576                   | 1                 | -                                       | 1.9                | -                | 1.9                     | Unknown                                                                                              | mRNA processing, regulates switching between alternative RNA splicing events |
| Rbm17     | Splicing factor 45                                                     | Ser155                   | 1                 | 1.7                                     | 1.4 <sup>§</sup>   | 1.0 <sup>§</sup> | 1.7                     | Unknown                                                                                              | mRNA processing, RNA splicing                                                |
| Rbmx      | Heterogeneous nuclear ribonucleoprotein G                              | Ser165                   | 1                 | -                                       | 1.5                | -                | 1.5                     | Unknown                                                                                              | mRNA processing, RNA splicing                                                |
| Rgs2      | Regulator of G-protein signaling 2                                     | Ser19                    | 1                 | -                                       | 12.2               | -                | 12.2                    | Unknown                                                                                              | GAP, brown fat cell differentiation                                          |
| Rnf220    | E3 ubiquitin-protein ligase Rnf220                                     | Thr474                   | 1                 | -                                       | -                  | 5.6              | 5.6                     | Unknown                                                                                              | Ubiquitin                                                                    |
| Rptor     | Regulatory-associated protein of mTOR (raptor)                         | Ser863                   | 1                 | 1.5                                     | 2.0                | 1.9              | 2.0                     | Required for hierarchical raptor phosphorylation and plays a critical role in mTOR activity (12, 13) | Adaptor, mTORC1                                                              |
| Sdpr      | Serum deprivation-response protein                                     | Ser359                   | 1                 | 1.6                                     | -                  | -                | 1.6                     | Unknown                                                                                              | Lipid binding protein, binds phosphatidylserine                              |
| Senp7     | Sentrin-specific protease 7                                            | Ser12                    | 1                 | -                                       | 2.7                | -                | 2.7                     | Unknown                                                                                              | Protease, deconjugation of SUMO2 and SUMO3 chains                            |
| Sgta      | Small glutamine-rich tetratricopeptide repeat-containing protein alpha | [Ser303 >Thr305]         | 1                 | -                                       | [2.0]              | -                | 2.0                     | Unknown                                                                                              | Chaperone                                                                    |
| Shc1      | SHC-transforming protein 1                                             | Tyr423                   | 1                 | -                                       | 3.7                | -                | 3.7                     | Binds Grb2 (14)                                                                                      | Adaptor, ras/MAPK pathway                                                    |
| Sipa1l2   | Signal-induced proliferation-associated 1-like protein 2               | Ser1461                  | 1                 | -                                       | -                  | 1.6              | 1.6                     | Unknown                                                                                              | Regulation GTPase                                                            |

| Gene Name | Protein Name                                             | Phosphosite <sup>1</sup>         | # of phosphosites | Normalized ratio (+GH/-GH) <sup>2</sup> |                    |                  |                         | Function of phosphosite                                                | Function of protein <sup>4</sup>                                       |
|-----------|----------------------------------------------------------|----------------------------------|-------------------|-----------------------------------------|--------------------|------------------|-------------------------|------------------------------------------------------------------------|------------------------------------------------------------------------|
|           |                                                          |                                  |                   | 5 min <sup>a</sup>                      | 5 min <sup>b</sup> | 15 min           | Max. ratio <sup>3</sup> |                                                                        |                                                                        |
| Slc9a1    | Sodium/hydrogen exchanger 1 (Nhe1)                       | Ser707                           | 1                 | -                                       | 7.3                | 3.3              | 7.3                     | Binds 14-3-3 and is required for serum-induced activation of Nhe1 (15) | Ion channel, regulates pH, regulation of cell growth, differentiation  |
| Srrm1     | Serine/arginine repetitive matrix protein 1              | [Ser461 >Ser463]                 | 1                 | -                                       | [2.8]              | -                | 2.8                     | Unknown                                                                | mRNA processing, RNA splicing, RNA export                              |
| Srrm2     | Serine/arginine repetitive matrix protein 2              | Ser2224                          | 1                 | -                                       | 2.9                | -                | 2.9                     | Unknown                                                                | mRNA processing, RNA splicing                                          |
| Stat5a    | Signal transducer and activator of transcription 5a      | Tyr694                           | 1                 | -                                       | +GH only           | +GH only         | 199                     | Required for Stat5a activation (16)                                    | Transcription                                                          |
| Stat5b    | Signal transducer and activator of transcription 5b      | Tyr699                           | 1                 | -                                       | +GH only           | +GH only         | 199                     | Required for Stat5b activation (16)                                    | Transcription                                                          |
| Stk10     | Serine/threonine kinase 10                               | Thr950                           | 1                 | -                                       | 2                  | 2.3              | 2.3                     | Unknown                                                                | Kinase, lymphocyte-oriented kinase                                     |
| Stmn1     | Stathmin                                                 | Ser25                            | 1                 | -                                       | 7.6                | -                | 7.6                     | Unknown                                                                | Cytoskeleton, promotes disassembly of microtubules                     |
| Tbc1d15   | TBC1 domain family member 15                             | Ser201                           | 1                 | -                                       | -                  | 1.6              | 1.6                     | Unknown                                                                | GAP, GAP for rab family proteins                                       |
| Tnks1bp1  | 182 kDa tankyrase-1-binding protein                      | Ser1022                          | 1                 | -                                       | 2.5                | -                | 2.5                     | Unknown                                                                | Cytoskeleton, actin binding                                            |
| Tnks1bp1  | 182 kDa tankyrase-1-binding protein                      | Ser1375                          | 1                 | -                                       | 1.5                | 1.8              | 1.8                     | Unknown                                                                | Cytoskeleton, actin binding                                            |
| Tns3      | Tensin-3                                                 | Ser769                           | 1                 | 2.0                                     | -                  | -                | 2.0                     | Unknown                                                                | Adaptor                                                                |
| Top2b     | DNA topoisomerase 2-beta                                 | Ser1387 (Ser1537)                | 1                 | 1.5                                     | 1.9                | 1.0 <sup>§</sup> | 1.9                     | Unknown                                                                | DNA binding, makes transient double strand breaks in DNA               |
| Tpr       | Nuclear pore complex-associated intranuclear protein TPR | Ser2149                          | 1                 | -                                       | 6.3                | -                | 6.3                     | Unknown                                                                | Nuclear matrix protein, mitotic cell cycle spindle assembly checkpoint |
| Trim28    | Transcription intermediary factor 1-beta                 | Ser471                           | 1                 | -                                       | -                  | 2.3              | 2.3                     | Unknown                                                                | Kinase, regulates transcription                                        |
| Trim28    | Transcription intermediary factor 1-beta                 | Ser473                           | 1                 | -                                       | 1.5                | 2.4              | 2.4                     | Regulates Trim28 interaction with HP1beta (17)                         | Kinase, regulates transcription                                        |
| Trim47    | Tripartite motif-containing protein 47                   | Ser591 (Ser592)                  | 1                 | -                                       | -                  | 2.0              | 2.0                     | Unknown                                                                | Ubiquitin                                                              |
| Trio      | Triple functional domain protein                         | Ser2399, Ser2403 (Ser2575, 2579) | 2                 | -                                       | 5.0                | -                | 5.0                     | Unknown                                                                | GEF, protein kinase, apoptosis                                         |



| Gene Name                                                                                                                                                                                                                                                                                                                                                                                                                                                                                                                                                        | Protein Name                              | Phosphosite <sup>1</sup>                            | # of phosphosites | Normalized ratio (+GH/-GH) <sup>2</sup> |                    |        |                         | Function of phosphosite                                                                                | Function of protein <sup>4</sup>                                                                                                                               |
|------------------------------------------------------------------------------------------------------------------------------------------------------------------------------------------------------------------------------------------------------------------------------------------------------------------------------------------------------------------------------------------------------------------------------------------------------------------------------------------------------------------------------------------------------------------|-------------------------------------------|-----------------------------------------------------|-------------------|-----------------------------------------|--------------------|--------|-------------------------|--------------------------------------------------------------------------------------------------------|----------------------------------------------------------------------------------------------------------------------------------------------------------------|
|                                                                                                                                                                                                                                                                                                                                                                                                                                                                                                                                                                  |                                           |                                                     |                   | 5 min <sup>a</sup>                      | 5 min <sup>b</sup> | 15 min | Max. ratio <sup>3</sup> |                                                                                                        |                                                                                                                                                                |
| Tsc2                                                                                                                                                                                                                                                                                                                                                                                                                                                                                                                                                             | Tuberin                                   | [Ser939 >Thr940 >Ser941] [(Ser937 >Thr938 >Ser939)] | 1                 | -                                       | [1.9]              | -      | 1.9                     | Phosphorylation Ser939 promotes interaction with 14-3-3 and relieves inhibition of mTOR signaling (18) | GAP, negative regulator of mTOR signaling, tumor suppressor                                                                                                    |
| Twist1                                                                                                                                                                                                                                                                                                                                                                                                                                                                                                                                                           | Twist-related protein 1                   | Ser68                                               | 1                 | 1.6                                     | -                  | -      | 1.6                     | Unknown                                                                                                | Transcription, binds E Box sequences, represses TNF $\alpha$ and IL1 $\beta$ , regulates FGFR2, forelimb morphogenesis, muscle development, neuronal migration |
| Twist2                                                                                                                                                                                                                                                                                                                                                                                                                                                                                                                                                           | Twist-related protein 2                   | Ser55                                               | 1                 | 1.6                                     | -                  | -      | 1.6                     | Unknown                                                                                                | Transcription, binds E Box consensus sequence, represses expression of TNF $\alpha$ and IL1 $\beta$                                                            |
| Usp10                                                                                                                                                                                                                                                                                                                                                                                                                                                                                                                                                            | Ubiquitin carboxyl-terminal hydrolase 10  | Ser223                                              | 1                 | -                                       | 3.8                | -      | 3.8                     | Unknown                                                                                                | Ubiquitin, disassembles ubiquitin chains                                                                                                                       |
| Wdr48                                                                                                                                                                                                                                                                                                                                                                                                                                                                                                                                                            | WD repeat-containing protein 48           | Ser586                                              | 1                 | -                                       | -                  | 5.0    | 5.0                     | Unknown                                                                                                | Vesicle protein, lysosomal protein                                                                                                                             |
| Zc3hc1                                                                                                                                                                                                                                                                                                                                                                                                                                                                                                                                                           | Nuclear-interacting partner of ALK (Nipa) | Ser394                                              | 1                 | -                                       | -                  | 1.8    | 1.8                     | Unknown                                                                                                | Ubiquitin, nuclear protein, inactivation increases cyclin B1 levels and mitotic entry                                                                          |
| Zc3hc1                                                                                                                                                                                                                                                                                                                                                                                                                                                                                                                                                           | Nuclear-interacting partner of ALK (Nipa) | Ser406                                              | 1                 | -                                       | 2.6                | -      | 2.6                     | Unknown                                                                                                | Ubiquitin, nuclear protein, inactivation increases cyclin B1 levels and mitotic entry                                                                          |
| Zyx                                                                                                                                                                                                                                                                                                                                                                                                                                                                                                                                                              | Zyxin                                     | Ser336                                              | 1                 | -                                       | 1.8                | -      | 1.8                     | Unknown                                                                                                | Cytoskeleton, focal adhesions, cell-cell adherens junctions                                                                                                    |
| <sup>1</sup> Residue numbering is according to PhosphositePlus ( <a href="http://www.phosphosite.org">http://www.phosphosite.org</a> ).                                                                                                                                                                                                                                                                                                                                                                                                                          |                                           |                                                     |                   |                                         |                    |        |                         |                                                                                                        |                                                                                                                                                                |
| ( ) When residue numbering varies between Phosphosite and MaxQuant, MaxQuant numbering is listed in parentheses.                                                                                                                                                                                                                                                                                                                                                                                                                                                 |                                           |                                                     |                   |                                         |                    |        |                         |                                                                                                        |                                                                                                                                                                |
| [ ] Residues in brackets refer to unlocalized sites (localization probability <0.75 and > 0.15, see Supplemental Tables 3 - 5).                                                                                                                                                                                                                                                                                                                                                                                                                                  |                                           |                                                     |                   |                                         |                    |        |                         |                                                                                                        |                                                                                                                                                                |
| <sup>2</sup> Phosphosites with a significant (B<0.05) increase correspond to sites with an increase greater than ~40% (5 min <sup>a</sup> trial) and ~50% (5 min <sup>b</sup> and 15 min trials). For statistically significant phosphosites, if the same phosphosite was detected in another of the other trials, the ratio in the other trial is also listed in the table even if not significant. Ratios that are not significant are indicated with §. The ratios are normalized to correct for unequal amounts of "light" and "heavy" protein in the assay. |                                           |                                                     |                   |                                         |                    |        |                         |                                                                                                        |                                                                                                                                                                |
| <sup>3</sup> The maximum normalized ratio (+GH/-GH) in the three trials. To facilitate sorting, the ratio was defined as 199 for phosphosites detected in only the +GH condition.                                                                                                                                                                                                                                                                                                                                                                                |                                           |                                                     |                   |                                         |                    |        |                         |                                                                                                        |                                                                                                                                                                |
| <sup>4</sup> Function of proteins that contain the phosphopeptides identified during the SILAC-based phosphoproteomic screens were classified according to the functions tabulated in Phosphosite Plus ( <a href="http://www.phosphosite.org">http://www.phosphosite.org</a> (January 28, 2011)). Information in Phosphosite includes information from UniProtKB. The first function listed is the category used to construct the pie charts in Fig 4A,B.                                                                                                        |                                           |                                                     |                   |                                         |                    |        |                         |                                                                                                        |                                                                                                                                                                |
| <sup>5</sup> The disease in parentheses is caused by a mutation in the protein containing the identified phosphosite.                                                                                                                                                                                                                                                                                                                                                                                                                                            |                                           |                                                     |                   |                                         |                    |        |                         |                                                                                                        |                                                                                                                                                                |
| <b>References (Supplemental Table 1)</b>                                                                                                                                                                                                                                                                                                                                                                                                                                                                                                                         |                                           |                                                     |                   |                                         |                    |        |                         |                                                                                                        |                                                                                                                                                                |
| 1. Potapova IA, El-Maghrabi MR, Doronin SV, Benjamin WB 2000 Phosphorylation of recombinant human ATP:citrate lyase by cAMP-dependent protein kinase abolishes homotropic allosteric regulation of the enzyme by citrate and increases the enzyme activity. Allosteric activation of ATP:citrate lyase by phosphorylated sugars. <i>Biochemistry</i> 39:1169-1179                                                                                                                                                                                                |                                           |                                                     |                   |                                         |                    |        |                         |                                                                                                        |                                                                                                                                                                |



| Supplemental Table S2. Phosphosites which exhibit decreased phosphorylation after GH treatment. |                                          |                                  |                   |                                         |                    |        |                         |                                                                                              |
|-------------------------------------------------------------------------------------------------|------------------------------------------|----------------------------------|-------------------|-----------------------------------------|--------------------|--------|-------------------------|----------------------------------------------------------------------------------------------|
| Gene Name                                                                                       | Protein Name                             | Phosphosite <sup>1</sup>         | # of phosphosites | Normalized ratio (+GH/-GH) <sup>2</sup> |                    |        |                         | Function of phosphosite                                                                      |
|                                                                                                 |                                          |                                  |                   | 5 min <sup>a</sup>                      | 5 min <sup>b</sup> | 15 min | Min. ratio <sup>3</sup> |                                                                                              |
| 9-Sep                                                                                           | Septin-9                                 | Ser30                            | 1                 | -                                       | 0.7                | -      | 0.7                     | Unknown                                                                                      |
| 9-Sep                                                                                           | Septin-9                                 | Thr143                           | 1                 | -                                       | 0.5                | -      | 0.5                     | Unknown                                                                                      |
| Acaca                                                                                           | Acetyl-CoA carboxylase 1                 | Ser29 (S67)                      | 1                 | -                                       | 0.2                | -      | 0.2                     | Unknown                                                                                      |
| Ahnak                                                                                           | Ahnak protein                            | Ser5101                          | 1                 | 0.7                                     | 0.8                | -      | 0.7                     | Unknown                                                                                      |
| Ahnak                                                                                           | Ahnak protein                            | Ser5510                          | 1                 | -                                       | 0.7                | -      | 0.7                     | Unknown                                                                                      |
| Ahnak                                                                                           | Ahnak protein                            | Ser5512                          | 1                 | 1.0 <sup>§</sup>                        | 0.6                | -      | 0.6                     | Unknown                                                                                      |
| Ahnak                                                                                           | Ahnak protein                            | Ser5553                          | 1                 | -                                       | 0.7                | -      | 0.7                     | Unknown                                                                                      |
| Ahnak                                                                                           | Ahnak protein                            | Ser5555                          | 1                 | 0.8                                     | 0.6                | -      | 0.6                     | Unknown                                                                                      |
| Ahnak                                                                                           | Ahnak protein                            | Ser5563                          | 1                 | -                                       | 0.6                | -      | 0.6                     | Unknown                                                                                      |
| Ahnak                                                                                           | Ahnak protein                            | Thr5571<br>[Thr5567<br>~Thr5569] | 2                 | -                                       | 0.7                | -      | 0.7                     | Unknown                                                                                      |
| Arhgef7                                                                                         | Rho guanine nucleotide exchange factor 7 | Ser580                           | 1                 | -                                       | -                  | 0.7    | 0.7                     | Unknown                                                                                      |
| BC089491                                                                                        | cDNA sequence BC089491                   | Ser225<br>[Ser228<br>=Thr229]    | 2                 | -                                       | 0.03               | -      | 0.03                    | Unknown                                                                                      |
| Bcor                                                                                            | BCL-6 corepressor                        | Tyr977                           | 1                 | 0.4                                     | -                  | -      | 0.4                     | Unknown                                                                                      |
| Bmp10                                                                                           | Bone morphogenetic protein 10            | Thr94,<br>Ser101                 | 2                 | -                                       | -                  | 0.1    | 0.1                     | Unknown                                                                                      |
| Cav1                                                                                            | Caveolin-1                               | Tyr14                            | 1                 | -                                       | 0.7                | -      | 0.7                     | Phosphorylated Y14 interacts with Grb7 (1), required for localization to focal adhesions (2) |
| Clasp1                                                                                          | CLIP-associating protein 1               | Ser794<br>(Ser795)               | 1                 | -                                       | 0.7                | -      | 0.7                     | Unknown                                                                                      |
| Ctnnd1                                                                                          | Catenin delta-1                          | [Ser320<br>=Tyr321]              | 1                 | -                                       | [0.7]              | -      | 0.7                     | Unknown                                                                                      |
| Cx3cl1                                                                                          | Fractalkine                              | [Ser259<br>>Ser262]              | 1                 | -                                       | [0.7]              | -      | 0.7                     | Unknown                                                                                      |
| Cx3cl1                                                                                          | Fractalkine                              | Ser262                           | 1                 | -                                       | 0.7                | -      | 0.7                     | Unknown                                                                                      |
| Dclk1                                                                                           | Serine/threonine-protein kinase DCLK1    | [Thr336<br>=Ser337]              | 1                 | -                                       | [0.7]              | -      | 0.7                     | Unknown                                                                                      |
| Dclk1                                                                                           | Serine/threonine-protein kinase DCLK1    | Ser305                           | 1                 | -                                       | 0.7                | -      | 0.7                     | Unknown                                                                                      |
| Dhx9                                                                                            | ATP-dependent RNA helicase A             | Ser136<br>(Ser137)               | 1                 | 0.6                                     | 1.2 <sup>§</sup>   | -      | 0.6                     | Unknown                                                                                      |
| Dock9                                                                                           | Dedicator of cytokinesis protein 9       | Ser1384,<br>Ser1378              | 2                 | -                                       | 0.1                | -      | 0.1                     | Unknown                                                                                      |
| Dpf2                                                                                            | D4, zinc and double PHD fingers family 2 | [Ser142]                         | 1                 | -                                       | -                  | [0.6]  | 0.6                     | Unknown                                                                                      |

| Gene Name        | Protein Name                                                             | Phospho-site <sup>1</sup> | # of phospho-sites | Normalized ratio (+GH/-GH) <sup>2</sup> |                    |        |                         | Function of phosphosite                                                    |
|------------------|--------------------------------------------------------------------------|---------------------------|--------------------|-----------------------------------------|--------------------|--------|-------------------------|----------------------------------------------------------------------------|
|                  |                                                                          |                           |                    | 5 min <sup>a</sup>                      | 5 min <sup>b</sup> | 15 min | Min. ratio <sup>3</sup> |                                                                            |
| Dpf2             | D4, zinc and double PHD fingers family 2                                 | Ser142                    | 1                  | 1.2 <sup>§</sup>                        | -                  | -      | 1.2                     | Unknown                                                                    |
| Dyrk1a           | Dual specificity tyrosine-phosphorylation-regulated kinase 1A            | [Tyr321]                  | 1                  | -                                       | -                  | [0.7]  | 0.7                     | Y321 is an autophosphorylation site that is required for full activity (3) |
| Dyrk1a           | Dual specificity tyrosine-phosphorylation-regulated kinase 1A            | Tyr321                    | 1                  | 1.0 <sup>§</sup>                        | 1.1 <sup>§</sup>   | -      | 1                       | Y321 is an autophosphorylation site that is required for full activity (3) |
| E130012A19 Rik   | Uncharacterized protein C17orf96 homolog                                 | Ser19, Thr24              | 2                  | 0.04                                    | -                  | -      | 0.04                    | Unknown                                                                    |
| Eap1             | Enhanced at puberty protein 1                                            | Ser638 (Ser696)           | 1                  | 1.3 <sup>§</sup>                        | -                  | 0.5    | 0.5                     | Unknown                                                                    |
| Eef2             | Elongation factor 2                                                      | Thr57                     | 1                  | -                                       | 0.6                | -      | 0.6                     | Phosphorylation T57 inhibits activity (4)                                  |
| Eif4g1           | Eukaryotic translation initiation factor 4 gamma 1                       | Ser1189                   | 1                  | -                                       | 0.7                | -      | 0.7                     | Unknown                                                                    |
| Epb4.1l2         | Erythrocyte protein band 4.1-like 2                                      | [Ser86 >Tyr87]            | 1                  | -                                       | [0.7]              | -      | 0.7                     | Unknown                                                                    |
| Fat1             | Cadherin FAT1 isoform +12                                                | Ser4475 (Ser4483)         | 1                  | -                                       | 0.6                | -      | 0.6                     | Unknown                                                                    |
| Gas7             | Growth arrest specific 7 similar to DNA cytosine-5 methyltransferase 3B2 | Ser62                     | 1                  | -                                       | 0.7                | -      | 0.7                     | Unknown                                                                    |
| Gm14490          | DNA cytosine-5 methyltransferase 3B2                                     | Ser290                    | 1                  | 0.04                                    | -                  | -      | 0.04                    | Unknown                                                                    |
| Hdgfrp2          | Hepatoma-derived growth factor-related protein 2                         | Ser644                    | 1                  | 0.7                                     | -                  | -      | 0.7                     | Unknown                                                                    |
| Hmgn1            | Non-histone chromosomal protein HMG-14                                   | [Thr80 >Ser84 >Ser87]     | 1                  | -                                       | -                  | [0.6]  | 0.6                     | Unknown                                                                    |
| Hnmpul2          | Heterogeneous nuclear ribonucleoprotein U-like protein 2                 | Thr163                    | 1                  | -                                       | 0.7                | -      | 0.7                     | Unknown                                                                    |
| KIAA1143 homolog | Uncharacterized protein KIAA1143 homolog                                 | Ser50                     | 1                  | 0.7                                     | -                  | -      | 0.7                     | Unknown                                                                    |
| Kiaa1712         | Uncharacterized protein KIAA1712                                         | Thr287, Ser292            | 2                  | 0.7                                     | -                  | -      | 0.7                     | Unknown                                                                    |
| Klc2             | Klc2 protein                                                             | Ser579                    | 1                  | 0.7                                     | -                  | -      | 0.7                     | Unknown                                                                    |

| Gene Name | Protein Name                                             | Phosphosite <sup>1</sup>                                                      | # of phosphosites | Normalized ratio (+GH/-GH) <sup>2</sup> |                    |        |                         | Function of phosphosite |
|-----------|----------------------------------------------------------|-------------------------------------------------------------------------------|-------------------|-----------------------------------------|--------------------|--------|-------------------------|-------------------------|
|           |                                                          |                                                                               |                   | 5 min <sup>a</sup>                      | 5 min <sup>b</sup> | 15 min | Min. ratio <sup>3</sup> |                         |
| Lmna      | Lamin-A/C                                                | Ser395<br>[Ser390<br>=Ser392<br>>Thr394]                                      | 2                 | -                                       | 0.3                | -      | 0.3                     | Unknown                 |
| Lmna      | Lamin-A/C                                                | Thr394,<br>Ser395                                                             | 2                 | 1.2 <sup>§</sup>                        | -                  | -      | 1.2                     | Unknown                 |
| Map3k2    | Mitogen-activated protein kinase kinase kinase 2         | Ser164<br>(Ser180)                                                            | 1                 | -                                       | 0.6                | -      | 0.6                     | Unknown                 |
| Mast4     | Microtubule-associated serine/threonine-protein kinase 4 | Ser204                                                                        | 1                 | 0.7                                     | -                  | -      | 0.7                     | Unknown                 |
| Mcm2      | DNA replication licensing factor MCM2                    | Ser21                                                                         | 1                 | 0.7                                     | -                  | -      | 0.7                     | Unknown                 |
| Mical2    | JRAB                                                     | Ser766                                                                        | 1                 |                                         | 0.5                |        | 0.5                     | Unknown                 |
| Mrip      | Myosin phosphatase Rho-interacting protein               | Ser292                                                                        | 1                 | 0.8                                     | 0.7                | -      | 0.7                     | Unknown                 |
| Mre11a    | Double-strand break repair protein MRE11A                | Ser686                                                                        | 1                 | -                                       | 0.2                | -      | 0.2                     | Unknown                 |
| Myadm     | Myeloid-associated differentiation marker                | [Ser17<br>>Ser15<br>=Ser16<br>=Thr18<br>>Thr14<br>=Thr19<br>>Thr12<br>=Thr13] | 1                 | [0.7]                                   | -                  | -      | 0.7                     | Unknown                 |
| Myo1c     | Myosin-1c                                                | Ser6                                                                          | 1                 |                                         | 0.5                |        | 0.5                     | Unknown                 |
| Myr12     | Myosin regulatory light polypeptide 9                    | [Thr19<br>=Ser20]                                                             | 1                 | -                                       | [0.6]              | -      | 0.6                     | Unknown                 |
| Myr12     | Myosin regulatory light polypeptide 9                    | Ser20                                                                         | 1                 | -                                       | 0.6                | -      | 0.6                     | Unknown                 |
| Nadk      | NAD kinase                                               | Ser46                                                                         | 1                 | -                                       | 0.6                | -      | 0.6                     | Unknown                 |
| Nap114    | Nap114 protein                                           | [Thr117<br>>Ser121<br>>Ser125<br>>Thr111]                                     | 1                 | [0.6]                                   | -                  | -      | 0.6                     | Unknown                 |
| Ndrp1     | N-myc downstream-regulated gene 1 protein                | [Ser333<br>>Thr335<br>=Ser336<br>>Ser330<br>=S332<br>>Thr328<br>>Thr340]      | 1                 | -                                       | [0.5]              | -      | 0.5                     | Unknown                 |

| Gene Name | Protein Name                                                                   | Phosphosite <sup>1</sup>                         | # of phosphosites | Normalized ratio (+GH/-GH) <sup>2</sup> |                    |        |                         | Function of phosphosite |
|-----------|--------------------------------------------------------------------------------|--------------------------------------------------|-------------------|-----------------------------------------|--------------------|--------|-------------------------|-------------------------|
|           |                                                                                |                                                  |                   | 5 min <sup>a</sup>                      | 5 min <sup>b</sup> | 15 min | Min. ratio <sup>3</sup> |                         |
| Ndrp1     | N-myc downstream-regulated gene 1 protein                                      | [Ser333 >Thr335 =Ser336 >Ser332 >Ser330 >Thr328] | 1                 | [1.3 <sup>§</sup> ]                     | -                  | -      | 1.3                     | Unknown                 |
| Nfia      | Nuclear factor 1 A-type                                                        | S310                                             | 1                 | -                                       | 0.8                | 0.7    | 0.7                     | Unknown                 |
| Nherf1    | Na(+)/H(+) exchange regulatory cofactor NHERF1                                 | Ser285                                           | 1                 | 0.7                                     | -                  | -      | 0.7                     | Unknown                 |
| Npm1      | Nucleophosmin                                                                  | [Thr75 =Thr78 >Ser48 >Y67 =Ser70 =Thr42]         | 1                 | -                                       | [0.1]              | -      | 0.1                     | Unknown                 |
| Nptx1     | Neuronal pentraxin-1                                                           | [Ser203, Ser207]                                 | 2                 | -                                       | -                  | [0.04] | 0.04                    | Unknown                 |
| Nudt1     | 7,8-dihydro-8-oxoguanine triphosphatase                                        | [Tyr7 >Thr8 >Ser2 =Thr3 >Ser4]                   | 2                 | -                                       | [0.02]             | -      | 0.02                    | Unknown                 |
| Palm      | Paralemmin                                                                     | Thr141, Thr145                                   | 2                 | -                                       | 0.6                | -      | 0.6                     | Unknown                 |
| Pdha1     | Pyruvate dehydrogenase E1 component subunit alpha, somatic form, mitochondrial | [Thr231 =Ser232]                                 | 1                 | -                                       | [0.7]              | -      | 0.7                     | Unknown                 |
| Pdha1     | Pyruvate dehydrogenase E1 component subunit alpha, somatic form, mitochondrial | Ser232                                           | 1                 | -                                       | 0.7                | 0.9*   | 0.7                     | Unknown                 |
| Pdim2     | PDZ and LIM domain protein 2                                                   | Ser199, Ser205                                   | 2                 | 0.7                                     | -                  | -      | 0.7                     | Unknown                 |
| Pdim2     | PDZ and LIM domain protein 2                                                   | Ser199, Ser205                                   | 2                 | 0.8                                     | -                  | -      | 0.8                     | Unknown                 |
| Pgm1      | Phosphoglucosyltransferase-1                                                   | [Thr115 =Ser117]                                 | 1                 | -                                       | [0.6]              | -      | 0.6                     | Unknown                 |
| Pgm1      | Phosphoglucosyltransferase-1                                                   | Ser117                                           | 1                 | -                                       | 0.7                | -      | 0.7                     | Unknown                 |
| Plec1     | Plectin-1                                                                      | Ser4620 (Ser4472)                                | 1                 | -                                       | 0.7                | 0.4    | 0.4                     | Unknown                 |
| Ppap2a    | Lipid phosphate phosphohydrolase 1                                             | [Ser274 >Thr272 =Thr275 >Thr268 >Thr267]         | 1                 | -                                       | [0.7]              | -      | 0.7                     | Unknown                 |
| Ppap2a    | Lipid phosphate phosphohydrolase 1                                             | Ser274                                           | 1                 | 0.8 <sup>§</sup>                        | -                  | -      | 0.8                     | Unknown                 |
| Ppap2a    | Lipid phosphate phosphohydrolase 1                                             | Thr271 (Thr272)                                  | 1                 | -                                       | 0.7                | -      | 0.7                     | Unknown                 |

| Gene Name | Protein Name                                                      | Phospho-site <sup>1</sup>           | # of phospho-sites | Normalized ratio (+GH/-GH) <sup>2</sup> |                    |        |                         | Function of phosphosite                                     |
|-----------|-------------------------------------------------------------------|-------------------------------------|--------------------|-----------------------------------------|--------------------|--------|-------------------------|-------------------------------------------------------------|
|           |                                                                   |                                     |                    | 5 min <sup>a</sup>                      | 5 min <sup>b</sup> | 15 min | Min. ratio <sup>3</sup> |                                                             |
| Ppp1r12a  | Ppp1r12a protein                                                  | [Ser693 >Thr694]                    | 1                  | [0.9 <sup>§</sup> ]                     | -                  | -      | 0.9                     | Phosphorylation of S693 reduces phosphorylation of T694 (5) |
| Ppp1r12a  | Ppp1r12a protein                                                  | Ser693                              | 1                  | -                                       | 0.6                | -      | 0.6                     | Phosphorylation of S693 reduces phosphorylation of T694 (5) |
| Ppp1r12a  | Ppp1r12a protein                                                  | Thr694                              | 1                  | 1.1 <sup>§</sup>                        | 0.6                | -      | 0.6                     | Phosphorylation of T694 inhibits phosphatase activity (6)   |
| Ppp1r2    | Putative uncharacterized protein Ppp1r2                           | Thr117, Ser123 >Ser122 >Ser131      | 2                  | 0.5                                     | -                  | -      | 0.5                     | Unknown                                                     |
| Prkd3     | Protein kinase D3                                                 | Ser44                               | 1                  | 0.4                                     | -                  | -      | 0.4                     | Unknown                                                     |
| Pxn       | Paxillin                                                          | Ser119                              | 1                  | -                                       | 0.6                | -      | 0.6                     | Unknown                                                     |
| Rad50     | DNA repair protein RAD50                                          | Thr564, Ser565 [Ser557 =Ser560]     | 3                  | -                                       | [0.5]              | -      | 0.5                     | Unknown                                                     |
| Rc3h2     | Ring finger and CCCH-type zinc finger domain-containing protein 2 | Ser895, Ser907                      | 2                  | -                                       | 0.001              | -      | 0.001                   | Unknown                                                     |
| Scrib     | Protein scribble homolog                                          | Ser1543, Ser1548 (Ser1550, Ser1555) | 2                  | -                                       | 0.7                | -      | 0.7                     | Unknown                                                     |
| Sfrs11    | Splicing factor, arginine/serine-rich 11, isoform CRA_b           | Ser389 (Ser477)                     | 1                  | -                                       | 1.2 <sup>§</sup>   | 0.7    | 0.7                     | Unknown                                                     |
| Skiv2l    | MCG15924, isoform CRA_a                                           | [Ser242 >Ser240 =Ser244 =Thr246]    | 1                  | [0.6]                                   | -                  | -      | 0.6                     | Unknown                                                     |
| Sntb2     | Sntb2 protein                                                     | [Ser88 =Ser90]                      | 1                  | -                                       | -                  | [0.2]  | 0.2                     | Unknown                                                     |
| Sntb2     | Beta-2-syntrophin                                                 | Ser88                               | 1                  | -                                       | 1.1 <sup>§</sup>   | -      | 1.1                     | Unknown                                                     |
| Sntb2     | Beta-2-syntrophin                                                 | Ser90                               | 1                  | 0.9 <sup>§</sup>                        | 0.9 <sup>§</sup>   | -      | 0.9                     | Unknown                                                     |
| Srrm2     | Serine/arginine repetitive matrix protein 2                       | [Ser1305]                           | 1                  | -                                       | -                  | [0.7]  | 0.7                     | Unknown                                                     |
| Srrm2     | Serine/arginine repetitive matrix protein 2                       | Ser1305                             | 1                  | 1.1 <sup>§</sup>                        | 1.1 <sup>§</sup>   | -      | 1.1                     | Unknown                                                     |
| Svil      | Supervillin                                                       | [Tyr809 >Tyr811] [(Tyr405 >Tyr407)] | 1                  | -                                       | [0.7]              | -      | 0.7                     | Unknown                                                     |
| Synpo     | Synaptopodin                                                      | Ser583                              | 1                  | -                                       | 0.1                | -      | 0.1                     | Unknown                                                     |

| Gene Name                                                                                                                                                                                                                                                                                                                                                                                                                                                                                                                                                                                                                                                                                                                                                                                                                                                                                                                                                                                                                                                                                                                                                                                                                                                                                                                                                                                                                                                                                                                                                                                                          | Protein Name                                                            | Phosphosite <sup>1</sup>         | # of phosphosites | Normalized ratio (+GH/-GH) <sup>2</sup> |                    |        |                         | Function of phosphosite |
|--------------------------------------------------------------------------------------------------------------------------------------------------------------------------------------------------------------------------------------------------------------------------------------------------------------------------------------------------------------------------------------------------------------------------------------------------------------------------------------------------------------------------------------------------------------------------------------------------------------------------------------------------------------------------------------------------------------------------------------------------------------------------------------------------------------------------------------------------------------------------------------------------------------------------------------------------------------------------------------------------------------------------------------------------------------------------------------------------------------------------------------------------------------------------------------------------------------------------------------------------------------------------------------------------------------------------------------------------------------------------------------------------------------------------------------------------------------------------------------------------------------------------------------------------------------------------------------------------------------------|-------------------------------------------------------------------------|----------------------------------|-------------------|-----------------------------------------|--------------------|--------|-------------------------|-------------------------|
|                                                                                                                                                                                                                                                                                                                                                                                                                                                                                                                                                                                                                                                                                                                                                                                                                                                                                                                                                                                                                                                                                                                                                                                                                                                                                                                                                                                                                                                                                                                                                                                                                    |                                                                         |                                  |                   | 5 min <sup>a</sup>                      | 5 min <sup>b</sup> | 15 min | Min. ratio <sup>3</sup> |                         |
| Tmpo                                                                                                                                                                                                                                                                                                                                                                                                                                                                                                                                                                                                                                                                                                                                                                                                                                                                                                                                                                                                                                                                                                                                                                                                                                                                                                                                                                                                                                                                                                                                                                                                               | Lamina-associated polypeptide 2, isoforms beta/delta/epsilon/ilon/gamma | [Ser277 =Thr278]                 | 1                 | [0.6]                                   | -                  | -      | 0.6                     | Unknown                 |
| Tub                                                                                                                                                                                                                                                                                                                                                                                                                                                                                                                                                                                                                                                                                                                                                                                                                                                                                                                                                                                                                                                                                                                                                                                                                                                                                                                                                                                                                                                                                                                                                                                                                | Tubby protein                                                           | Ser333                           | 1                 | 0.2                                     |                    |        | 0.2                     | Unknown                 |
| Ubash3b                                                                                                                                                                                                                                                                                                                                                                                                                                                                                                                                                                                                                                                                                                                                                                                                                                                                                                                                                                                                                                                                                                                                                                                                                                                                                                                                                                                                                                                                                                                                                                                                            | Ubiquitin-associated and SH3 domain-containing protein B                | Ser542                           | 1                 | -                                       | 0.2                | -      | 0.2                     | Unknown                 |
| Vasp                                                                                                                                                                                                                                                                                                                                                                                                                                                                                                                                                                                                                                                                                                                                                                                                                                                                                                                                                                                                                                                                                                                                                                                                                                                                                                                                                                                                                                                                                                                                                                                                               | Vasodilator-stimulated phosphoprotein                                   | Ser317                           | 1                 | -                                       | 0.5                | -      | 0.5                     | Unknown                 |
| Vim                                                                                                                                                                                                                                                                                                                                                                                                                                                                                                                                                                                                                                                                                                                                                                                                                                                                                                                                                                                                                                                                                                                                                                                                                                                                                                                                                                                                                                                                                                                                                                                                                | Vimentin                                                                | [Thr417 >Ser419 =Ser420 >Ser412] | 1                 | -                                       | [0.7]              | -      | 0.7                     | Unknown                 |
|                                                                                                                                                                                                                                                                                                                                                                                                                                                                                                                                                                                                                                                                                                                                                                                                                                                                                                                                                                                                                                                                                                                                                                                                                                                                                                                                                                                                                                                                                                                                                                                                                    |                                                                         |                                  |                   |                                         |                    |        |                         |                         |
| <sup>1</sup> Residue numbering is according to PhosphositePlus ( <a href="http://www.phosphosite.org">http://www.phosphosite.org</a> ).                                                                                                                                                                                                                                                                                                                                                                                                                                                                                                                                                                                                                                                                                                                                                                                                                                                                                                                                                                                                                                                                                                                                                                                                                                                                                                                                                                                                                                                                            |                                                                         |                                  |                   |                                         |                    |        |                         |                         |
| ( ) When residue numbering varies between Phosphosite and MaxQuant, MaxQuant numbering is listed in parentheses.                                                                                                                                                                                                                                                                                                                                                                                                                                                                                                                                                                                                                                                                                                                                                                                                                                                                                                                                                                                                                                                                                                                                                                                                                                                                                                                                                                                                                                                                                                   |                                                                         |                                  |                   |                                         |                    |        |                         |                         |
| [ ] Residues in brackets refer to unlocalized sites (localization probability <0.75 and > 0.15, see Supplemental Tables 3 - 5).                                                                                                                                                                                                                                                                                                                                                                                                                                                                                                                                                                                                                                                                                                                                                                                                                                                                                                                                                                                                                                                                                                                                                                                                                                                                                                                                                                                                                                                                                    |                                                                         |                                  |                   |                                         |                    |        |                         |                         |
| <sup>2</sup> Phosphosites with a significant (B<0.05) decrease correspond to sites with a decrease less than ~20%. Because the decrease required for significance is small, if borderline phosphosites were detected in a second trial, often the change falls below statistical relevance. To minimize the uncertainty associated with these peptides, for our analysis, we selected phosphosites that decreased by ≥ 30%. For statistically significant phosphosites, if the same phosphosite was detected in another trial, the ratio in the other trial is also listed in the table. Ratios that are not significant are indicated with a §. The ratios are normalized to correct for unequal amounts of "light" and "heavy" protein in the assay.                                                                                                                                                                                                                                                                                                                                                                                                                                                                                                                                                                                                                                                                                                                                                                                                                                                             |                                                                         |                                  |                   |                                         |                    |        |                         |                         |
| <sup>3</sup> The minimum normalized ratio (+GH/-GH) in the three trials.                                                                                                                                                                                                                                                                                                                                                                                                                                                                                                                                                                                                                                                                                                                                                                                                                                                                                                                                                                                                                                                                                                                                                                                                                                                                                                                                                                                                                                                                                                                                           |                                                                         |                                  |                   |                                         |                    |        |                         |                         |
| <b>References (Supplemental Table 2)</b>                                                                                                                                                                                                                                                                                                                                                                                                                                                                                                                                                                                                                                                                                                                                                                                                                                                                                                                                                                                                                                                                                                                                                                                                                                                                                                                                                                                                                                                                                                                                                                           |                                                                         |                                  |                   |                                         |                    |        |                         |                         |
| <ol style="list-style-type: none"> <li>Lee H, Volonte D, Galbiati F, Iyengar P, Lublin DM, Bregman DB, Wilson MT, Campos-Gonzalez R, Bouzahzah B, Pestell RG, Scherer PE, Lisanti MP 2000 Constitutive and growth factor-regulated phosphorylation of caveolin-1 occurs at the same site (Tyr-14) in vivo: identification of a c-Src/Cav-1/Grb7 signaling cassette. <i>Mol Endocrinol</i> 14:1750-1775</li> <li>Nethe M, Anthony EC, Fernandez-Borja M, Dee R, Geerts D, Hensbergen PJ, Deelder AM, Schmidt G, Hordijk PL 2010 Focal-adhesion targeting links caveolin-1 to a Rac1-degradation pathway. <i>J Cell Sci</i> 123:1948-1958</li> <li>Himpel S, Panzer P, Eirnbter K, Czajkowska H, Sayed M, Packman LC, Blundell T, Kentrup H, Grotzinger J, Joost HG, Becker W 2001 Identification of the autophosphorylation sites and characterization of their effects in the protein kinase DYRK1A. <i>Biochem J</i> 359:497-505</li> <li>Redpath NT, Price NT, Severinov KV, Proud CG 1993 Regulation of elongation factor-2 by multisite phosphorylation. <i>Eur J Biochem/ FEBS</i> 213:689-699</li> <li>Wooldridge AA, MacDonald JA, Erdodi F, Ma C, Borman MA, Hartshorne DJ, Haystead TA 2004 Smooth muscle phosphatase is regulated in vivo by exclusion of phosphorylation of threonine 696 of MYPT1 by phosphorylation of Serine 695 in response to cyclic nucleotides. <i>J Biol Chem</i> 279:34496-34504</li> <li>Ichikawa K, Ito M, Hartshorne DJ 1996 Phosphorylation of the large subunit of myosin phosphatase and inhibition of phosphatase activity. <i>J Biol Chem</i> 271:4733-4740</li> </ol> |                                                                         |                                  |                   |                                         |                    |        |                         |                         |



| Supplemental Table S3. Phosphoproteomics data from the first 5 min GH treatment experiment. |             |                          |                        |       |             |               |                     |                         |                        |             |                          |                |             |                         |
|---------------------------------------------------------------------------------------------|-------------|--------------------------|------------------------|-------|-------------|---------------|---------------------|-------------------------|------------------------|-------------|--------------------------|----------------|-------------|-------------------------|
| No                                                                                          | IPI Numbers | Protein Names            | Gene Names             | pAA   | Number of P | Position in p | Peptide Sequence    | Phospho (STY) Probabil  | Modified Sequence      | Best Motifs | Ratio <sup>1</sup> of Ph | Ratio Signific | Up-/Down-re | Phosphosites localized? |
| 393                                                                                         | IPI00229328 | 1110037F02Rik protein    | 1110037F02Rik;Kiaa142  | S1628 | 1           | 8             | SFLSEPS5SPGR        | SFLSEPS(0.05)/S(0.949)P | SFLSEPS(ph)PGR         | WW GroupIV  | 1.1                      | 0.36872        |             | Yes                     |
| 227                                                                                         | IPI00458153 | Uncharacterized protein  | 6330577E15Rik;633057   | S67   | 1           | 5             | ENPPSPPTSPAAPQPR    | ENPPS(0.999)PPT(0.00)   | ENPPS(ph)PPTSPAAPQPR   | WW GroupIV  | 0.9                      | 0.2209         |             | Yes                     |
| 169                                                                                         | IPI00458153 | Uncharacterized protein  | 6330577E15Rik;633057   | T70   | 1           | 8             | ENPPSPPTSPAAPQPR    | ENPPS(0.122)PPT(0.85)   | ENPPSPPT(ph)SPAAPQPR   | CK1         | 0.9                      | 0.15415        |             | Yes                     |
| 559                                                                                         | IPI00753321 | Antigen containing epit  | A230054D04Rik;AF013    | S2909 | 1           | 3             | SVSETSEDKKDEESDEEE  | S(0.092)VS(0.276)ET(0.  | SVS(ph)ETSEDKKDEESDEEE | PLGATTR     |                          |                |             | No                      |
| 561                                                                                         | IPI00753321 | Antigen containing epit  | A230054D04Rik;AF013    | S2912 | 1           | 6             | SVSETSEDKKDEESDEEE  | S(0.092)VS(0.276)ET(0.  | SVS(ph)ETSEDKKDEESD    | CK1         |                          |                |             | No                      |
| 462                                                                                         | IPI00753321 | Antigen containing epit  | A230054D04Rik;AF013    | S2920 | 1           | 14            | SVSETSEDKKDEESDEEE  | SVSETS(0.001)EDKKDEE    | SVSETSEDKKDEES(ph)D    | CK2         | 1.0                      | 0.424          |             | Yes                     |
| 560                                                                                         | IPI00753321 | Antigen containing epit  | A230054D04Rik;AF013    | T2911 | 1           | 5             | SVSETSEDKKDEESDEEE  | S(0.092)VS(0.276)ET(0.  | SVS(ph)ETSEDKKDEESD    | FHA1 Ra53p  |                          |                |             | No                      |
| 150                                                                                         | IPI00458612 | AP2-associated protein   | Aak1;Kiaa1048;Aak1;Kia | T604  | 1           | 4             | VQTTPTPTIQQGQK      | VQT(0.005)T(0.995)PPP   | VQTT(ph)PPTIQQGQK      |             | 0.9                      | 0.1304         |             | Yes                     |
| 440                                                                                         | IPI00396671 | ATP-binding cassette su  | Abcf1;Abcf1            | S103  | 1           | 5             | LKQLSVPASDEEDEVPA   | LKQLS(0.994)VPAS(0.00   | LKQLS(ph)VPASDEEDEV    | GSK3        | 1.1                      | 0.4071         |             | Yes                     |
| 370                                                                                         | IPI00396671 | ATP-binding cassette su  | Abcf1;Abcf1            | S107  | 1           | 9             | LKQLSVPASDEEDEVPA   | LKQLS(0.004)VPAS(0.99   | LKQLSVPAS(ph)DEEDEV    | CK2         | 1.0                      | 0.35344        |             | Yes                     |
| 398                                                                                         | IPI00396671 | ATP-binding cassette su  | Abcf1;Abcf1            | S138  | 1           | 13            | GGNVFEALIQDDSEEEEE  | GGNVFEALIQDDSD(1)EEE    | GGNVFEALIQDDSD(ph)E    | CK2         | 1.1                      | 0.37209        |             | Yes                     |
| 407                                                                                         | IPI00922962 | Apoptotic chromatin co   | Acin1;RP23-94B13.1-00  | S477  | 1           | 1             | SLSPSLGTTDTK        | S(0.643)LS(0.357)PLSGT  | S(ph)LSPLSGTTDTK       | NEK6        | 1.0                      | 0.38041        |             | No                      |
| 238                                                                                         | IPI00922962 | Apoptotic chromatin co   | Acin1;RP23-94B13.1-00  | S479  | 1           | 3             | SLSPSLGTTDTK        | S(0.178)LS(0.821)PLS(0. | SLS(ph)LSGTTDTK        | CHK1/2      | 1.2                      | 0.22542        |             | Yes                     |
| 562                                                                                         | IPI00922962 | Apoptotic chromatin co   | Acin1;RP23-94B13.1-00  | S387  | 1           | 1             | SQSPSPPLPEDLEK      | S(0.418)QS(0.291)PS(0.  | S(ph)SQSPSPPLPEDLEK    | GSK3        |                          |                |             | No                      |
| 186                                                                                         | IPI00922962 | Apoptotic chromatin co   | Acin1;RP23-94B13.1-00  | S389  | 1           | 3             | SQSPSPPLPEDLEK      | S(0.12)QS(0.827)PS(0.0  | SQSPSPPLPEDLEK         |             | 1.3                      | 0.1683         |             | Yes                     |
| 49                                                                                          | IPI00126248 | Putative uncharacterize  | Acly;Acly;Acly;RP23-39 | S455  | 1           | 3             | TASFESRADEVAPAKK    | T(0.185)AS(0.772)FS(0.  | TAS(ph)FESRADEVAPAK    | PKA/AKT     | 1.5                      | 0.017006       | Up          | Yes                     |
| 563                                                                                         | IPI00126248 | Putative uncharacterize  | Acly;Acly;Acly;RP23-39 | S457  | 1           | 5             | TASFESRADEVAPAKK    | T(0.072)AS(0.051)FS(0.  | TASF(ph)FESRADEVAPAK   | CK1         |                          |                |             | No                      |
| 564                                                                                         | IPI00126248 | Putative uncharacterize  | Acly;Acly;Acly;RP23-39 | S459  | 1           | 7             | TASFESRADEVAPAKK    | T(0.072)AS(0.051)FS(0.  | TASF(ph)FESRADEVAPAK   | CK1         |                          |                |             | No                      |
| 180                                                                                         | IPI00126248 | Putative uncharacterize  | Acly;Acly;Acly;RP23-39 | S481  | 1           | 12            | AKPAMPQDSVPSPPR     | AKPAMPQDS(0.001)VP      | AKPAMPQDSVPS(ph)PR     | ERK/MAPK    | 0.9                      | 0.1618         |             | Yes                     |
| 565                                                                                         | IPI00136000 | Alpha-adducin;Erythro    | Add1;Add1              | S464  | 1           | 18            | WLHSGRGDDASEEGQN    | WLHSGRGDDAS(0.004)      | WLHSGRGDDASEEGQN       | GSK3        |                          |                |             | Yes                     |
| 420                                                                                         | IPI00136000 | Alpha-adducin;Erythro    | Add1;Add1              | S465  | 1           | 19            | WLHSGRGDDASEEGQN    | WLHSGRGDDASEEGQN        | WLHSGRGDDASEEGQN       | Polo box    | 1.0                      | 0.39207        |             | Yes                     |
| 566                                                                                         | IPI00387580 | Gamma-adducin;Adduc      | Add3;Add1;Add3;Add1;   | S679  | 1           | 12            | TEEVLPDGSPPSKSPK    | TEEVLPDGS(0.004)PS(0.   | TEEVLPDGSPPSKSPK       | GSK3        |                          |                |             | No                      |
| 477                                                                                         | IPI00387580 | Gamma-adducin;Adduc      | Add3;Add1;Add3;Add1;   | S681  | 1           | 14            | TEEVLPDGSPPSKSPK    | TEEVLPDGSPPSKS(0.94)    | TEEVLPDGSPPSKS(ph)P    | CDK2        | 1.1                      | 0.44426        |             | Yes                     |
| 567                                                                                         | IPI00890205 | AF4/FMR2 family, mem     | Aff2;RP23-324H24.1-00  | S580  | 1           | 2             | LSTSDVTVSQR         | LS(0.949)T(0.05)SVDTV   | LS(ph)SVDTVTVSQR       |             |                          |                |             | Yes                     |
| 367                                                                                         | IPI00553798 | Ahnak protein            | Ahnak                  | S116  | 1           | 7             | SSEVVLGDDDEDYQR     | SSEVVL(1)GDDEDYQR       | SSEVVL(ph)GDDEDYQR     |             | 1.0                      | 0.35164        |             | Yes                     |
| 13                                                                                          | IPI00553798 | Ahnak protein            | Ahnak                  | S136  | 1           | 3             | LRSEEDGVEGDLGETQSR  | LRS(1)EDGVEGDLGETQSR    | LRS(ph)EDGVEGDLGETQ    | CAMK2       | 3.4                      | 9.769E-13      | Up          | Yes                     |
| 408                                                                                         | IPI00553798 | Ahnak protein            | Ahnak                  | S211  | 1           | 7             | TVIRLPSGSGPASPTTGS  | T(0.003)VIRLPS(0.82)GS  | TVIRLPS(ph)GSGPASPTT   | PKD         | 1.0                      | 0.38101        |             | Yes                     |
| 114                                                                                         | IPI00553798 | Ahnak protein            | Ahnak                  | S217  | 1           | 13            | TVIRLPSGSGPASPTTGS  | TVIRLPSGSGPAS(0.969)    | TVIRLPSGSGPAS(ph)PTT   | WW GroupIV  | 1.3                      | 0.092133       |             | Yes                     |
| 22                                                                                          | IPI00553798 | Ahnak protein            | Ahnak                  | S4890 | 1           | 9             | FKAEPALPSPK         | FKAEPALPS(1)PK          | FKAEPALPS(ph)PK        | CDK1        | 2.2                      | 3.346E-06      | Up          | Yes                     |
| 515                                                                                         | IPI00553798 | Ahnak protein            | Ahnak                  | S5099 | 1           | 12            | GPSLKGDLGASSPSMK    | GPSLKGDLGAS(0.017)S     | GPSLKGDLGASS(ph)PSM    | Polo box    | 1.1                      | 0.47333        |             | Yes                     |
| 50                                                                                          | IPI00553798 | Ahnak protein            | Ahnak                  | S5101 | 1           | 9             | GDLGASSPSMK         | GDLGASS(0.003)PS(0.99   | GDLGASS(ph)MK          | CK1         | 1.0                      | 0.017137       | Down        | Yes                     |
| 307                                                                                         | IPI00553798 | Ahnak protein            | Ahnak                  | S5504 | 1           | 8             | GKGGVTGSPEASISGSK   | GKGGVTGS(1)PEASISGS     | GKGGVTGS(ph)PEASISG    | GSK3        | 0.7                      | 0.30559        |             | Yes                     |
| 168                                                                                         | IPI00553798 | Ahnak protein            | Ahnak                  | S5508 | 1           | 10            | GGVTGSPEASISGSKGDL  | GGVTGSPEAS(0.921)S      | GGVTGSPEAS(ph)ISGSK    | PLK1        | 0.9                      | 0.15209        |             | Yes                     |
| 263                                                                                         | IPI00553798 | Ahnak protein            | Ahnak                  | S5512 | 1           | 14            | GGVTGSPEASISGSKGDL  | GGVTGSPEAS(0.099)S      | GGVTGSPEASISGSK(ph)K   | CK1         | 1.0                      | 0.25891        |             | Yes                     |
| 144                                                                                         | IPI00553798 | Ahnak protein            | Ahnak                  | S5518 | 2           | 1             | SSKASLGSLEGEVEAEASS | S(0.604)S(0.547)KAS(0.  | S(ph)S(ph)KASLGSLEGE   | GSK3        | 0.9                      | 0.12359        |             | No                      |
| 145                                                                                         | IPI00553798 | Ahnak protein            | Ahnak                  | S5519 | 2           | 2             | SSKASLGSLEGEVEAEASS | S(0.604)S(0.547)KAS(0.  | S(ph)S(ph)KASLGSLEGE   | NEK6        | 0.9                      | 0.12359        |             | No                      |
| 268                                                                                         | IPI00553798 | Ahnak protein            | Ahnak                  | S5553 | 1           | 3             | HRSNSFSDEREFSAPTPT  | HRS(0.68)NS(0.159)FS    | HRS(ph)NSFSDEREFSAPT   | PIM1/2      | 1.0                      | 0.26321        |             | No                      |
| 62                                                                                          | IPI00553798 | Ahnak protein            | Ahnak                  | S5555 | 1           | 5             | HRSNSFSDER          | HRS(0.08)NS(0.839)FS    | HRSNS(ph)FSDER         | PKA/AKT     | 0.8                      | 0.027929       | Down        | Yes                     |
| 25                                                                                          | IPI00553798 | Ahnak protein            | Ahnak                  | S5557 | 1           | 7             | HRSNSFSDEREFSAPTPT  | HRS(0.06)NS(0.06)FS(0.  | HRSNS(ph)DEREFSAPT     | CK1         | 2.1                      | 2.512E-08      | Up          | No                      |
| 569                                                                                         | IPI00553798 | Ahnak protein            | Ahnak                  | S5563 | 2           | 11            | SNSFSDEREFSAPTPTG   | S(0.312)NS(0.678)FS(0.  | SNS(ph)FS(ph)DEREFSA   | CAMK2       |                          |                |             | No                      |
| 277                                                                                         | IPI00553798 | Ahnak protein            | Ahnak                  | S5566 | 2           | 14            | SNSFSDEREFSAPTPTG   | S(0.499)NS(0.436)FS(0.  | S(ph)NSFSDEREFSAPT     | CK1         | 1.0                      | 0.27772        |             | No                      |
| 466                                                                                         | IPI00553798 | Ahnak protein            | Ahnak                  | T219  | 1           | 11            | LPSGSGPASPTTGS      | LPSGSGPAS(0.333)PT(0.   | LPSGSGPAS(ph)PTTGS     | FHA KAPP    | 1.1                      | 0.42668        |             | No                      |
| 568                                                                                         | IPI00553798 | Ahnak protein            | Ahnak                  | T220  | 1           | 12            | LPSGSGPASPTTGS      | LPSGSGPAS(0.333)PT(0.   | LPSGSGPAS(ph)PTTGS     | CK1         |                          |                |             | No                      |
| 18                                                                                          | IPI00553798 | Ahnak protein            | Ahnak                  | T5567 | 2           | 17            | HRSNSFSDEREFSAPTPT  | HRS(0.067)NS(0.19)FS    | HRSNSFSDEREFSAPT       | WW GroupIV  | 2.5                      | 9.892E-08      | Up          | No                      |
| 19                                                                                          | IPI00553798 | Ahnak protein            | Ahnak                  | T5569 | 2           | 19            | HRSNSFSDEREFSAPTPT  | HRS(0.067)NS(0.19)FS    | HRSNSFSDEREFSAPT       | CK1         | 2.5                      | 9.892E-08      | Up          | No                      |
| 414                                                                                         | IPI00553798 | Ahnak protein;Ahnak p    | Ahnak;Ahnak;MCG 178    | S94   | 1           | 5             | KGDRSPEPGQWTWTEVF   | KGDRS(1)PEPGQWTWTEVF    | KGDRS(ph)PEPGQWTWTEVF  | FSSR        | 1.1                      | 0.38612        |             | Yes                     |
| 507                                                                                         | IPI00850843 | Putative uncharacterize  | Ahnak2;AI450948        | S286  | 1           | 3             | DMSPTSTDETVHR       | DMS(0.999)PTSTDETVHR    | DMS(ph)PTSTDETVHR      | CAMK2       | 1.1                      | 0.4668         |             | Yes                     |
| 570                                                                                         | IPI00850843 | Putative uncharacterize  | Ahnak2;AI450948        | S289  | 1           | 6             | DMSPTSTDETVHR       | DMS(0.419)PT(0.11)S(0.  | DM(ox)S(ph)PTSTDETV    | CK1         |                          |                |             | No                      |
| 113                                                                                         | IPI00677756 | AHNAK nucleoprotein 2    | Ahnak2;AI450948        | S35   | 1           | 3             | KLSFSMPR            | KLS(1)FSMPR             | KLS(ph)FSMPR           | PKA/AKT     | 1.3                      | 0.090351       |             | Yes                     |
| 131                                                                                         | IPI00677756 | AHNAK nucleoprotein 2    | Ahnak2;AI450948        | S37   | 1           | 5             | KLSFSMPR            | KLS(0.5)FS(0.5)MPR      | KLS(ph)FSM(ox)PR       | NEK6        | 1.3                      | 0.10946        |             | No                      |
| 267                                                                                         | IPI00230591 | A kinase anchor protein  | Akap1;Akap;Akap1;RP2   | S136  | 1           | 3             | SESSGNLPSVADTR      | S(0.179)ES(0.82)S(0.00  | SES(ph)SGNLPSVADTR     | PKA/AKT     | 1.2                      | 0.26099        |             | Yes                     |
| 63                                                                                          | IPI00230591 | A kinase anchor protein  | Akap1;Akap;Akap1;RP2   | S142  | 1           | 11            | RRESSGNLPSVADTR     | RRESSGNLPS(0.984)VA     | RRESSGNLPS(ph)VADTR    |             | 1.5                      | 0.028525       | Up          | Yes                     |
| 11                                                                                          | IPI00857073 | Proline-rich AKT1 subst  | Akt1s1;Pras            | T318  | 1           | 3             | LNTSDFQK            | LNT(0.999)S(0.001)DFQ   | LNT(ph)SDFQK           | PKA/AKT     | 3.8                      | 2.178E-15      | Up          | Yes                     |
| 161                                                                                         | IPI00223838 | Ankyrin repeat domain    | Ankrd57                | S82   | 1           | 6             | FCTGDSPPLEAK        | FCTGDS(1)PPLEAK         | FCTGDS(ph)PPLEAK       |             | 0.9                      | 0.14002        |             | Yes                     |
| 191                                                                                         | IPI00117811 | AP-3 complex subunit c   | Ap3d1;Ap3d             | S760  | 1           | 8             | HSSLPTESDEDIAPAQR   | HSSLPT(0.002)ES(0.998)  | HSSLPTES(ph)DEDIAPAQR  |             | 0.9                      | 0.17344        |             | Yes                     |
| 571                                                                                         | IPI00119913 | Adenomatous polyposi     | Apc;Apc;MCG_121500;    | S2330 | 2           | 4             | NSISPRNGISPPNK      | NS(0.185)S(0.815)PGR    | NSIS(ph)PGRNGIS(ph)P   | CDK2        |                          |                |             | Yes                     |
| 572                                                                                         | IPI00119913 | Adenomatous polyposi     | Apc;Apc;MCG_121500;    | S2337 | 2           | 11            | NSISPRNGISPPNK      | NS(0.185)S(0.815)PGR    | NSIS(ph)PGRNGIS(ph)P   | PNK         |                          |                |             | Yes                     |
| 251                                                                                         | IPI00170307 | Apollipoprotein A-I bind | Apoa1bp;Aibp           | S43   | 1           | 3             | RGSETMAGAAVK        | RG(0.997)ET(0.003)M     | RG(ph)ETMAGAAVK        | PKA/AKT     | 1.0                      | 0.23934        |             | Yes                     |
| 112                                                                                         | IPI00170084 | DCC-interacting protein  | App1;Dip13a;Kiaa1428   | S401  | 1           | 12            | VNQSALEAVTPSPFQQ    | VNQSALEAVT(0.012)PS     | VNQSALEAVTPSPFQQ       |             | 0.9                      | 0.089849       |             | Yes                     |
| 61                                                                                          | IPI00123183 | Aquaporin-1;Aquaporin    | Aqp1                   | S262  | 1           | 19            | VWVTSGQVEEYDLDDADD  | VWVTSGQVEEYDLDDADD      | VWVTSGQVEEYDLDDADD     | CK2         | 0.8                      | 0.025407       | Down        | Yes                     |
| 244                                                                                         | IPI00652831 | Arginine and glutamate   | Arglu1;Arglu1          | S74   | 1           | 2             | ASSPPDRIDIFGR       | AS(0.865)S(0.135)PPDR   | AS(ph)SSPPDRIDIFGR     | PKA         | 1.2                      | 0.23205        |             | Yes                     |
| 435                                                                                         | IPI00652831 | Arginine and glutamate   | Arglu1;Arglu1          | S75   | 1           | 3             | ASSPPDRIDIFGR       | AS(0.071)S(0.929)PPDR   | ASS(ph)PPDRIDIFGR      | PKA/AKT     | 1.1                      | 0.40244        |             | Yes                     |
| 101                                                                                         | IPI00465761 | Rho guanine nucleotide   | Arhgef17;Kiaa0337      | S689  | 1           | 4             | ALVSPETPTPGALR      | ALVS(0.999)PET(0.001)   | ALVS(ph)PETPTPGALR     |             | 0.8                      | 0.076054       |             | Yes                     |

| No  | IPI Numbers | Protein Names              | Gene Names               | pAA   | Number of P | Position in p | Peptide Sequence    | Phospho (STY) Probabil     | Modified Sequence                    | Best Motifs      | Ratio <sup>1</sup> of Phd | Ratio Signific | Up-/Down-reg | Phosphosites localized? |  |
|-----|-------------|----------------------------|--------------------------|-------|-------------|---------------|---------------------|----------------------------|--------------------------------------|------------------|---------------------------|----------------|--------------|-------------------------|--|
| 156 | IPI00127472 | Armadillo repeat prote     | Arvcf;Arvcf;Arvcf;Arvcf; | S865  | 1           | 11            | GTPSSGGFDDSTLPLVDK  | GTPSSGGFDD(S)(0.5)T(0.0)   | GTPSSGGFDD(ph)TLPLVDK                |                  | 1.3                       | 0.13333        | No           |                         |  |
| 152 | IPI00127472 | Armadillo repeat prote     | Arvcf;Arvcf;Arvcf;Arvcf; | T637  | 1           | 4             | NFDTLDLPK           | NFDT(1)LDLPK               | NFDT(ph)LDLPK                        | FHA2 Rad53p      | 0.9                       | 0.13159        | Yes          |                         |  |
| 302 | IPI00349032 | Arf-GAP with SH3 doma      | Asap1;Ddef1;Kiaa1249;    | S1045 | 1           | 7             | SHTGDLSPNVQSR       | SHTGDL(S)(0.999)PNVQS      | SHTGDL(ph)PNVQSR                     | CK1              | 1.2                       | 0.30243        | Yes          |                         |  |
| 536 | IPI00380770 | Activating transcription   | Atf7ip;Mcaf1             | S112  | 1           | 12            | NKQEDLNSEALSPSITCD  | NKQEDLN(S)(0.108)EALS      | NKQEDLNSEAL(ph)PSIT                  | CK1              | 1.1                       | 0.4902         | Yes          |                         |  |
| 573 | IPI00556827 | Putative uncharacterize    | Atp2b1                   | S1219 | 1           | 17            | SATSSSPGSPHLHLETSL  | SATSSSPGSPHLH(S)(0.001)    | SATSSSPGSPHLHETS(ph)PLK1             |                  |                           |                | Yes          |                         |  |
| 69  | IPI00135975 | V-type proton ATPase 1     | Atp6v0a2;Atp6n1b;Tj6;    | S695  | 1           | 3             | KDEEEVSLGNQDIEEG    | KDS(0.997)EEV(S)(0.003)    | KDS(ph)EEVSLGNQDI                    | CHK1/2           | 1.4                       | 0.039482       | Up           | Yes                     |  |
| 516 | IPI00458001 | Ataxin-2-like protein;At   | Atxn2l;A2lp;Atxn2l;A2lj  | S556  | 1           | 6             | LQPSSSPETGLDPPFR    | LQPSS(0.001)(S)(0.999)P    | LQPSS(ph)PETGLDPPFR                  | Polo box         | 1.1                       | 0.47361        | Yes          |                         |  |
| 444 | IPI00458001 | Ataxin-2-like protein;At   | Atxn2l;A2lp;Atxn2l;A2lj  | S591  | 1           | 13            | EVDGLTSDPMGSPVSSK   | EVDGLTSDPMG(S)(1)PV        | EVDGLTSDPMG(ph)P                     | GSK3             | 1.0                       | 0.41141        | Yes          |                         |  |
| 162 | IPI00387388 | BCL2-associated athanc     | Bag3;Bag3;Bis;MNCb-2     | S177  | 1           | 1             | SQSPAASDCSSSSASLPS  | S(0.814)QS(0.168)PAAS      | S(ph)QSPAASDCSSSSASLPS               | SSGR             | 0.9                       | 0.14037        | Yes          |                         |  |
| 574 | IPI00387388 | BCL2-associated athanc     | Bag3;Bag3;Bis;MNCb-2     | S179  | 6           | 3             | SQSPAASDCSSSSASLPS  | S(0.538)QS(0.55)PAAS       | S(ph)QS(ph)PAAS(ph)D                 | CAMK2            |                           |                | No           |                         |  |
| 575 | IPI00387388 | BCL2-associated athanc     | Bag3;Bag3;Bis;MNCb-2     | S183  | 6           | 7             | SQSPAASDCSSSSASLPS  | S(0.538)QS(0.55)PAAS       | S(ph)QS(ph)PAAS(ph)D                 | GSK3             |                           |                | No           |                         |  |
| 576 | IPI00387388 | BCL2-associated athanc     | Bag3;Bag3;Bis;MNCb-2     | S186  | 6           | 10            | SQSPAASDCSSSSASLPS  | S(0.538)QS(0.55)PAAS       | S(ph)QS(ph)PAAS(ph)D                 | CK1              |                           |                | No           |                         |  |
| 577 | IPI00387388 | BCL2-associated athanc     | Bag3;Bag3;Bis;MNCb-2     | S187  | 6           | 11            | SQSPAASDCSSSSASLPS  | S(0.538)QS(0.55)PAAS       | S(ph)QS(ph)PAAS(ph)D                 | GSK3             |                           |                | No           |                         |  |
| 578 | IPI00387388 | BCL2-associated athanc     | Bag3;Bag3;Bis;MNCb-2     | S188  | 6           | 12            | SQSPAASDCSSSSASLPS  | S(0.538)QS(0.55)PAAS       | S(ph)QS(ph)PAAS(ph)DCS               | SSAS(ph)LPS      | SSGR                      |                |              | No                      |  |
| 579 | IPI00387388 | BCL2-associated athanc     | Bag3;Bag3;Bis;MNCb-2     | S193  | 6           | 17            | SQSPAASDCSSSSASLPS  | S(0.538)QS(0.55)PAAS       | S(ph)QS(ph)PAAS(ph)D                 | CK1              |                           |                | No           |                         |  |
| 580 | IPI00387388 | BCL2-associated athanc     | Bag3;Bag3;Bis;MNCb-2     | S197  | 6           | 21            | SQSPAASDCSSSSASLPS  | S(0.538)QS(0.55)PAAS       | S(ph)QS(ph)PAAS(ph)D                 | NEK6             |                           |                | No           |                         |  |
| 213 | IPI00380722 | Large proline-rich prote   | Bat2                     | T609  | 1           | 14            | EGPEPPEEVPPTTPAPP   | EGPEPPEEVPPTT(0.007)       | EGPEPPEEVPPTT(ph)P                   | WW GroupIV       | 0.9                       | 0.20405        | Yes          |                         |  |
| 313 | IPI00330171 | BAT2 domain-containin      | Bat2d1;Bat2d;Kiaa1096    | T2625 | 1           | 12            | AFGSGIDIKPGTPIPIIG  | AFGSGIDIKPGT(1)PIPIG       | AFGSGIDIKPGT(ph)PIPIG                | ERK/MAPK         | 1.0                       | 0.308          | Yes          |                         |  |
| 37  | IPI00331555 | 2-oxoisovalerate dehyd     | Bckdha                   | S338  | 1           | 5             | IGHHSTSDSSAYR       | IGHHS(0.834)T(0.082)S      | IGHHS(ph)TSDSSAYR                    |                  | 1.6                       | 0.0086446      | Up           | Yes                     |  |
| 581 | IPI00331555 | 2-oxoisovalerate dehyd     | Bckdha                   | S348  | 2           | 15            | IGHHSTSDSSAYRVSDE   | IGHHS(0.189)T(0.189)S      | IGHHSTSDSS(ph)SAYR                   | CK2              |                           |                | No           |                         |  |
| 122 | IPI00331555 | 2-oxoisovalerate dehyd     | Bckdha                   | S363  | 2           | 30            | IGHHSTSDSSAYRVSDE   | IGHHS(0.153)T(0.153)S      | IGHHSTSDSSAYRS(ph)S                  | VEVNYWQDQHPIS    | 1.3                       | 0.098488       | No           |                         |  |
| 196 | IPI00115094 | [3-methyl-2-oxobutano      | Bckdk                    | S31   | 1           | 1             | STSATDTHHVELAR      | S(0.545)T(0.397)(S)(0.058) | S(ph)TSATDTHHVELAR                   | CAMK2            | 1.3                       | 0.18052        | No           |                         |  |
| 258 | IPI00115094 | [3-methyl-2-oxobutano      | Bckdk                    | T32   | 1           | 2             | STSATDTHHVELAR      | S(0.161)T(0.742)(S)(0.085) | T(ph)TSATDTHHVELAR                   | PKA              | 1.2                       | 0.25122        | No           |                         |  |
| 451 | IPI00415385 | Bcl-2-associated transc    | Bclaf1;Btf;Kiaa0164;Bcl  | S177  | 1           | 10            | KAEGEPQEEPSLPSK     | KAEGEPQEE(S)(1)PLKSK       | KAEGEPQEE(ph)PLKSK                   | CDK2             | 1.1                       | 0.41887        | Yes          |                         |  |
| 43  | IPI00415385 | Bcl-2-associated transc    | Bclaf1;Btf;Kiaa0164;Bcl  | S383  | 1           | 17            | GRADGDWDDQEVLDYF    | GRADGDWDDQEVLDY            | GRADGDWDDQEVLDY                      | CK2              | 1.5                       | 0.013077       | Up           | Yes                     |  |
| 140 | IPI00415385 | Bcl-2-associated transc    | Bclaf1;Btf;Kiaa0164;Bcl  | S387  | 1           | 21            | GRADGDWDDQEVLDYF    | GRADGDWDDQEVLDY            | GRADGDWDDQEVLDY                      | CK1              | 1.3                       | 0.11723        | Yes          |                         |  |
| 394 | IPI00415385 | Bcl-2-associated transc    | Bclaf1;Btf;Kiaa0164;Bcl  | S395  | 1           | 4             | FHDSEGDTEETEDYR     | FHDS(1)EGDDTEETEDY         | FHDS(ph)EGDDTEETEDYR                 |                  | 1.0                       | 0.3697         | Yes          |                         |  |
| 513 | IPI00415385 | Bcl-2-associated transc    | Bclaf1;Btf;Kiaa0164;Bcl  | S656  | 1           | 4             | IDISPALSALR         | IDIS(1)PSALSALR            | IDIS(ph)PSALSALR                     |                  | 1.1                       | 0.472          | Yes          |                         |  |
| 533 | IPI00415385 | Bcl-2-associated transc    | Bclaf1;Btf;Kiaa0164;Bcl  | S658  | 1           | 7             | RIDISPALSALR        | RIDIS(0.5)PS(0.5)ALR       | RIDIS(ph)PSALSALR                    |                  | 1.1                       | 0.48683        | No           |                         |  |
| 524 | IPI00415385 | Bcl-2-associated transc    | Bclaf1;Btf;Kiaa0164;Bcl  | T400  | 1           | 11            | QKFHDESGDDTEETEDY   | QKFHDS(0.033)EGDDT         | QKFHDESGDDT(ph)EETEDYR               |                  | 1.1                       | 0.48036        | Yes          |                         |  |
| 15  | IPI00229530 | BCL-6 corepressor;BCL-     | Bcor;Kiaa1575;Bcor;Kia   | Y977  | 1           | 7             | IANSAGYVGRDFK       | IANS(0.001)AGY(0.999)      | IANSAGY(ph)VGRDFK                    | EGFR             | 0.4                       | 9.716E-10      | Down         | Yes                     |  |
| 55  | IPI00114352 | Myc box-dependent-int      | Bin1;Amphl;Sh3p9;Bin1    | S296  | 1           | 1             | SPSPPPDGSPPAATPEIR  | S(0.973)NPE(0.027)PPDP     | S(ph)SPSPPPDGSPPAATPEIR              |                  | 0.8                       | 0.022192       | Down         | Yes                     |  |
| 327 | IPI00114352 | Myc box-dependent-int      | Bin1;Amphl;Sh3p9;Bin1    | S298  | 1           | 16            | AQPSDNAPEKGNKSPSP   | AQPSDNAPEKGNK(S)(0.0)      | AQPSDNAPEKGNKSPS(ph)PPDPDGSPPAATPEIR |                  | 1.2                       | 0.31709        | Yes          |                         |  |
| 303 | IPI00114352 | Myc box-dependent-int      | Bin1;Amphl;Sh3p9;Bin1    | S304  | 1           | 9             | SPSPPPDGSPPAATPEIR  | SPSPPPDGS(0.994)PAA        | SPSPPPDGS(ph)PAAATPEIR               |                  | 1.2                       | 0.30269        | Yes          |                         |  |
| 192 | IPI00268218 | Zinc finger protein basc   | Bnc2;Bnc2;Bnc2           | S431  | 1           | 7             | TEPACVPIQNSAPVDSL   | T(0.002)EPACV(S)(0.998)    | TEPACV(ph)PIQNSAPVDSL                |                  | 1.3                       | 0.17359        | Yes          |                         |  |
| 486 | IPI00410792 | Bromodomain-containi       | Brd3;Frg2;Brd3;Frg2;B    | S262  | 1           | 3             | SESPPLSEPK          | S(0.095)ES(0.905)PPLS      | SES(ph)PPLSEPK                       | 14-3-3 binding   | 1.1                       | 0.45071        | Yes          |                         |  |
| 293 | IPI00118762 | Bystin                     | Bysl                     | S97   | 1           | 10            | LGPGLPQDGSDEEEDVE   | LGPGLPQDGS(1)DEEED         | LGPGLPQDGS(ph)DEED                   | CK2              | 1.2                       | 0.28944        | Yes          |                         |  |
| 143 | IPI00828741 | HnRNP-associated with      | C130057N11Rik;Raly;Rf    | S270  | 1           | 10            | LPAPQEDTASEAGTPQG   | LPAPQEDT(0.066)AS(0.4)     | LPAPQEDTAS(ph)EAGTPQGEVQTR           |                  | 0.9                       | 0.12314        | Yes          |                         |  |
| 582 | IPI00828741 | HnRNP-associated with      | C130057N11Rik;Raly;Rf    | T268  | 1           | 8             | LPAPQEDTASEAGTPQG   | LPAPQEDT(0.475)AS(0.4)     | LPAPQEDT(ph)ASEAGT                   | CK2              |                           |                | No           |                         |  |
| 142 | IPI00828741 | HnRNP-associated with      | C130057N11Rik;Raly;Rf    | T274  | 1           | 14            | LPAPQEDTASEAGTPQG   | LPAPQEDT(0.06)AS(0.06)     | LPAPQEDTASEAGT(ph)PQGEVQTR           |                  | 0.9                       | 0.12216        | Yes          |                         |  |
| 472 | IPI00828741 | HnRNP-associated with      | C130057N11Rik;Raly;Rf    | S135  | 1           | 4             | GRLSVPVPR           | GRLS(1)PVPVPR              | GRLS(ph)PVPVPR                       | PKA              | 1.1                       | 0.43325        | Yes          |                         |  |
| 348 | IPI00380280 | Carbamoyl-phosphate        | Cad;mCG_23490;Cad        | S1859 | 1           | 5             | IHRASDPLPAEPEK      | IHRAS(1)DPGLPAEPEK         | IHRAS(ph)DPGLPAEPEK                  | PKA              | 1.2                       | 0.33964        | Yes          |                         |  |
| 288 | IPI00775950 | Putative uncharacterize    | Cald1;Cald1              | S254  | 1           | 9             | LKQTENAFSPSR        | LKQT(0.001)ENAF(S)(0.999)  | LKQTENAFS(ph)PSR                     | CDK2             | 1.0                       | 0.28635        | Yes          |                         |  |
| 437 | IPI00119618 | Calnexin                   | Canx                     | S582  | 1           | 10            | AEEDEILNRSR         | AEEDEILNRS(1)PR            | AEEDEILNRS(ph)PR                     | CDK1             | 1.1                       | 0.40453        | Yes          |                         |  |
| 278 | IPI00776341 | Peripheral plasma mem      | Cask                     | S571  | 1           | 5             | TQSSCEDLPSTTQPK     | TQS(0.001)S(0.113)S(0.0)   | TQSSS(ph)CEDLPSTTQPK                 | CK1              | 1.0                       | 0.27901        | Yes          |                         |  |
| 314 | IPI00653604 | Coiled-coil domain-con     | Ccdc102a                 | S12   | 1           | 4             | LAESPQLSK           | LAES(1)PQLSK               | LAES(ph)PQLSK                        | NEK6             | 1.2                       | 0.30823        | Yes          |                         |  |
| 378 | IPI00170037 | Malcavernin;Cerebral c     | Ccm2;Osm;Ccm2;Osm        | S393  | 1           | 6             | GIITDSFGR           | GIITDS(1)FGR               | GIITDS(ph)FGR                        |                  | 1.0                       | 0.35947        | Yes          |                         |  |
| 385 | IPI00752728 | Cyclin-H                   | Ccnh                     | Y178  | 1           | 1             | YPMLENPEILRK        | Y(1)PMLENPEILRK            | Y(ph)PMLENPEILRK                     | ALK              | 1.0                       | 0.36155        | Yes          |                         |  |
| 255 | IPI00336973 | Cyclin-L1;Cyclin Ania-6    | Ccnl1;Ania6a;Ccn1        | S358  | 1           | 5             | AEEKSPVSNV          | AEEKS(0.995)PVS(0.005)     | AEEKS(ph)PVSINVK                     |                  | 1.2                       | 0.24467        | Yes          |                         |  |
| 501 | IPI00308149 | Cyclin-Y;Cyclin fold pr    | Ccny;Cfp1;Ccny;Cfp1      | S326  | 1           | 4             | RSASADNLLPR         | RSAS(1)ADNLLPR             | RSAS(ph)ADNLLPR                      | PKA/AKT          | 1.1                       | 0.46264        | Yes          |                         |  |
| 376 | IPI00753875 | Putative uncharacterize    | Ccny1                    | S352  | 1           | 4             | RSLSADNFIQIR        | RSLS(1)ADNFIQIR            | RSLS(ph)ADNFIQIR                     | CHK1             | 1.0                       | 0.35777        | Yes          |                         |  |
| 506 | IPI00464128 | Cell division cycle 2-like | Cdc215;Kiaa1791;Cdc21    | T1245 | 1           | 5             | IILETPEDRPR         | IILET(1)PEDRPR             | IILET(ph)PEDRPR                      | NEK6             | 1.1                       | 0.46395        | Yes          |                         |  |
| 583 | IPI00114613 | Serine/threonine-prote     | Cdc42bpb;Kiaa1124        | S1679 | 1           | 2             | HSTPSNNSNPSPGPPSPNS | HS(0.28)T(0.28)PS(0.10)    | HS(ph)TSPNSNPSPGPPSPNS               | CK1              |                           |                | No           |                         |  |
| 67  | IPI00114613 | Serine/threonine-prote     | Cdc42bpb;Kiaa1124        | S1692 | 1           | 15            | HSTPSNNSNPSPGPPSPNS | HSTPSNNSNPSPGPPS(0.9)      | HSTPSNNSNPSPGPPS(ph)WW GroupIV       |                  | 0.8                       | 0.034312       | Down         | Yes                     |  |
| 585 | IPI00114613 | Serine/threonine-prote     | Cdc42bpb;Kiaa1124        | S1695 | 1           | 18            | HSTPSNNSNPSPGPPSPNS | HSTPSNNSNPSPGPPS(0.5)      | HSTPSNNSNPSPGPPS(ph)WW GroupIV       |                  |                           |                | No           |                         |  |
| 584 | IPI00114613 | Serine/threonine-prote     | Cdc42bpb;Kiaa1124        | T1680 | 1           | 3             | HSTPSNNSNPSPGPPSPNS | HS(0.28)T(0.28)PS(0.10)    | HS(ph)TSPNSNPSPGPPSPNS               | Polo box         |                           |                | No           |                         |  |
| 389 | IPI00471127 | Cdc42 effector protein     | Cdc42ep1;Borg5;Cep1      | S207  | 1           | 4             | RSDSLLSFR           | RSDS(1)LLSFR               | RSDS(ph)LLSFR                        | CHK1/2           | 1.0                       | 0.36634        | Yes          |                         |  |
| 354 | IPI00138190 | Cadherin-11;Osteoblast     | Cdh11;Cad-11             | S714  | 1           | 9             | PGLRPAPNSVDVDFINT   | PGLRPAPNS(1)VDVDF          | PGLRPAPNS(ph)VDVDFINTR               |                  | 1.2                       | 0.34494        | Yes          |                         |  |
| 97  | IPI00752710 | CCAAT/enhancer-bindin      | Cebpz;Cb2;Cebpa-rs1      | S621  | 2           | 1             | SQLDDHPESDEENFVDV   | S(0.589)QLDDHPES(0.2)      | S(ph)QLDDHPESDEENFVDV                | GGDS(ph)DDEKFTDA | 1.4                       | 0.069273       | No           |                         |  |
| 100 | IPI00752710 | CCAAT/enhancer-bindin      | Cebpz;Cb2;Cebpa-rs1      | S629  | 2           | 9             | SQLDDHPESDEENFVDV   | S(0.002)QLDDHPES(0.9)      | SQLDDHPES(ph)DEENF                   | CK2              | 1.4                       | 0.073937       | Yes          |                         |  |
| 285 | IPI00752710 | CCAAT/enhancer-bindin      | Cebpz;Cb2;Cebpa-rs1      | S641  | 2           | 21            | SQLDDHPESDEENFVDV   | S(0.095)QLDDHPES(0.9)      | SQLDDHPES(ph)DEENF                   | CK2              | 1.2                       | 0.28263        | Yes          |                         |  |
| 586 | IPI00752710 | CCAAT/enhancer-bindin      | Cebpz;Cb2;Cebpa-rs1      | T647  | 2           | 27            | SQLDDHPESDEENFVDV   | S(0.003)QLDDHPES(0.9)      | SQLDDHPES(ph)DEENF                   | FHA1 Rad53p      |                           |                | No           |                         |  |
| 75  | IPI00653910 | Protein capicua homolo     | Cic;Kiaa0306;Cic;Kiaa03  | S2280 | 2           | 20            | FAELPFRPEEVLPSPTLQ  | FAELPFRPEEVLPS(0.24)       | FAELPFRPEEVLPSPTLQ                   | GSK3             | 1.4                       | 0.047282       | Up           | No                      |  |
| 102 | IPI00653910 | Protein capicua homolo     | Cic;Kiaa0306;Cic;Kiaa03  | S2284 | 2           | 24            | FAELPFRPEEVLPSPTLQ  | FAELPFRPEEVLPS(0.03)       | FAELPFRPEEVLPSPTLQ                   | CDK1             | 1.4                       | 0.084232       | Yes          |                         |  |
| 298 | IPI00672213 | CLIP-associating protei    | Clasp1;Kiaa0622;Clasp1   | S598  | 1           | 1             | SRSIDIVNAAASAK      | S(0.76)RS(0.24)DIVNAA      | S(ph)SRSIDIVNAAASAK                  | NEK6             | 1.0                       | 0.29916        | Yes          |                         |  |
| 421 | IPI00672213 | CLIP-associating protei    | Clasp1;Kiaa0622;Clasp1   | S600  | 1           | 3             | SRSIDIVNAAASAK      | S(0.092)RS(0.908)DIVN      | SRS(ph)SRSIDIVNAAASAK                | CHK1/2           | 1.0                       | 0.39313        | Yes          |                         |  |

| No  | IPI Numbers | Protein Names             | Gene Names               | pAA   | Number of P | Position in p | Peptide Sequence    | Phospho (STY) Probabil  | Modified Sequence                          | Best Motifs     | Ratio <sup>1</sup> of Phd | Ratio Signific | Up-/Down-reg | Phosphosites localized? |
|-----|-------------|---------------------------|--------------------------|-------|-------------|---------------|---------------------|-------------------------|--------------------------------------------|-----------------|---------------------------|----------------|--------------|-------------------------|
| 211 | IPI00857273 | CAP-Gly domain-contain    | Clip1;Kiaa4046;Rsn;Clip  | S203  | 1           | 14            | TASESINLSLEAGSVK    | TASESINLSLEAGS(1)VK     | TASESINLSLEAGS(ph)VK                       | CK1             | 0.9                       | 0.1993         |              | Yes                     |
| 274 | IPI00467854 | CAP-Gly domain-contain    | Clip2;Cynl2;Kiaa0291;C   | S295  | 1           | 7             | IGFPSTSPAK          | IGFPST(0.003)S(0.996)P  | IGFPSTS(ph)PAK                             | CDK2            | 1.0                       | 0.27355        |              | Yes                     |
| 322 | IPI00124248 | Chloride channel regula   | Clns1a;Cln               | S100  | 1           | 10            | LGEEKSKEPLSDEDEEDN  | LGEEKSKEPLS(1)DEDEED    | LGEEKSKEPLS(ph)DEDEEDNDDVEIPESEFR          |                 | 1.0                       | 0.31394        |              | Yes                     |
| 587 | IPI00230426 | Chymase;Alpha-chymas      | Cma1;Mcp5                | S193  | 2           | 14            | MRLQEQPOACKHFTSFR   | MRLQEQPOACKHFT(1)S      | M(ox)RQEQPOACKHFT(ph)S(ph)FR               |                 | 1.0                       | 0.34722        |              | Yes                     |
| 363 | IPI00135512 | Protein canopy homolo     | Cnpy2;Msap;Tmem4;Zs      | S115  | 1           | 4             | NGESSELDLQGR        | NGES(0.95)S(0.045)EL    | NGES(ph)SELDLQGR                           |                 | 1.0                       | 0.34722        |              | Yes                     |
| 383 | IPI00112963 | Catenin alpha-1;102 kD    | Ctnn1;Catna1             | S641  | 1           | 8             | TPEELDDSDFTEDFDVDR  | T(0.139)PEELDDSD(0.859) | TPEELDDSD(ph)DFETDF                        | CK2             | 1.1                       | 0.3608         |              | Yes                     |
| 229 | IPI00112963 | Catenin alpha-1;102 kD    | Ctnn1;Catna1             | T645  | 1           | 12            | TPEELDDSDFTEDFDVDR  | TPEELDDSD(0.67)DFET     | TPEELDDSDFT(ph)EDFDVDR                     |                 | 0.9                       | 0.22167        |              | Yes                     |
| 588 | IPI00112963 | Catenin alpha-1;102 kD    | Ctnn1;Catna1;Ctnna2;     | S652  | 1           | 1             | SRTSVQTEDDQLIAGQSA  | S(0.42)RT(0.29)S(0.29)  | S(ph)RTSVQTEDDQLIAGQSA                     |                 |                           |                |              | No                      |
| 91  | IPI00125899 | Catenin beta-1;Beta-ca    | Ctnnb1;Catnb;Ctnnb1      | S552  | 1           | 3             | RTSMGGTQQQFVEGVDR   | RT(0.012)S(0.988)MGG    | RTS(ph)M(ox)GGTQQQ                         | AURORA-A        | 0.8                       | 0.062974       |              | Yes                     |
| 589 | IPI00125899 | Catenin beta-1;Beta-ca    | Ctnnb1;Catnb;Ctnnb1      | T556  | 1           | 7             | RTSMGGTQQQFVEGVDR   | RT(0.161)S(0.42)MGGT    | RTS(ph)M(ox)GGTQQQFVEGVDR                  |                 |                           |                |              | No                      |
| 494 | IPI00120919 | RNA polymerase-associ     | Ctr9;Kiaa0155;Sh2bp1;    | T925  | 1           | 13            | KGGFEDEFVNDTDDDD    | KGGFEDEFVNDT(1)DD       | KGGFEDEFVNDT(ph)D                          | FHA1 Rad53p     | 1.1                       | 0.45883        |              | Yes                     |
| 104 | IPI00118143 | Src substrate cortactin   | Cctn;Ems1;Cctn;mCG       | S405  | 3           | 7             | KQTPPASPSQPPIEDRPP  | KQT(0.984)PPAS(0.691)   | KQT(ph)PPAS(ph)PSPQ                        | WW GroupIV      | 1.4                       | 0.081257       |              | No                      |
| 178 | IPI00118143 | Src substrate cortactin   | Cctn;Ems1;Cctn;mCG       | S407  | 3           | 9             | KQTPPASPSQPPIEDRPP  | KQT(0.985)PPAS(0.209)   | KQT(ph)PPASPS(ph)PQPIEDRPPSPPIY            | (ph)EDAAP       | 1.3                       | 0.16083        |              | Yes                     |
| 590 | IPI00118143 | Src substrate cortactin   | Cctn;Ems1;Cctn;mCG       | S417  | 3           | 19            | KQTPPASPSQPPIEDRPP  | KQT(0.984)PPAS(0.691)   | KQT(ph)PPAS(ph)PSPQ                        | CAMK2           |                           |                |              | No                      |
| 591 | IPI00118143 | Src substrate cortactin   | Cctn;Ems1;Cctn;mCG       | S418  | 3           | 20            | KQTPPASPSQPPIEDRPP  | KQT(0.984)PPAS(0.691)   | KQT(ph)PPAS(ph)PSPQ                        | WW GroupIV      |                           |                |              | No                      |
| 24  | IPI00754924 | Dapper homolog 3          | Dact3                    | S409  | 1           | 3             | SOSETLLGR           | S(0.094)QS(0.903)ET     | SOS(ph)ETSLGR                              | PKA/AKT         | 2.2                       | 4.57E-06       | Up           | Yes                     |
| 84  | IPI00128975 | Death-associated prote    | Dap                      | S49   | 1           | 9             | DKDDQEWESTSPPKPTV   | DKDDQEWES(0.736)T       | DKDDQEWES(ph)TSPPKTVFISGVIAR               |                 | 0.8                       | 0.056888       |              | No                      |
| 349 | IPI00128975 | Death-associated prote    | Dap                      | S51   | 1           | 11            | DKDDQEWESTSPPKPTV   | DKDDQEWES(0.013)T       | DKDDQEWESTS(ph)PK                          | CDK2            | 1.2                       | 0.34           |              | Yes                     |
| 402 | IPI00468380 | Serine/threonine-prote    | Dck1;Dcamk1l;Dcl;Dcl     | S32   | 2           | 6             | VNGLSPSTHSAHCSFYR   | VNGLPS(0.86)PT(0.04)    | VNGLPS(ph)PTHSAHCS                         | GSK3            | 1.1                       | 0.37752        |              | Yes                     |
| 403 | IPI00468380 | Serine/threonine-prote    | Dck1;Dcamk1l;Dcl;Dcl     | S40   | 2           | 14            | VNGLSPSTHSAHCSFYR   | VNGLPS(0.86)PT(0.04)    | VNGLPS(ph)PTHSAHCS                         | CK1             | 1.1                       | 0.37752        |              | Yes                     |
| 592 | IPI00468380 | Serine/threonine-prote    | Dck1;Dcamk1l;Dcl;Dcl     | S337  | 1           | 8             | SPSPSPTSPGSLR       | SPSPS(0.001)PT(0.499)   | SPSPSPT(ph)SPGSLR                          | WW GroupIV      |                           |                |              | No                      |
| 593 | IPI00130114 | mRNA-decapping enzyr      | Dcp1a;Mtc1;Smif          | S542  | 1           | 2             | ASSPSPLTVGTAESQR    | AS(0.497)S(0.497)PS     | AS(ph)SPSPLTVGTAESQ                        | CHK1/2          |                           |                |              | No                      |
| 594 | IPI00130114 | mRNA-decapping enzyr      | Dcp1a;Mtc1;Smif          | S543  | 1           | 3             | ASSPSPLTVGTAESQR    | AS(0.497)S(0.497)PS     | AS(ph)SPSPLTVGTAESQ                        | Polo box        |                           |                |              | No                      |
| 275 | IPI00120691 | Nucleolar RNA helicase    | Ddx21;Ddx21;mCG_113      | S118  | 1           | 8             | EIITEEPEEEEEADMPKPK | EIITEEPS(1)EEEDAMPK     | EIITEEPEEEEEADMPK                          | CK2             | 1.0                       | 0.27364        |              | Yes                     |
| 214 | IPI00329839 | ATP-dependent RNA he      | Ddx42;Ddx42              | S185  | 1           | 23            | YMAENPTAGVVQEEEE    | YMAENPTAGVVQEEEE        | YMAENPTAGVVQEEEEEDNLEYDS                   | (ph)JDNPIAPSK   | 1.2                       | 0.2045         |              | Yes                     |
| 281 | IPI00329839 | ATP-dependent RNA he      | Ddx42;Ddx42              | Y183  | 1           | 21            | YMAENPTAGVVQEEEE    | YMAENPTAGVVQEEEE        | YMAENPTAGVVQEEEEEDNLEYD                    | (ph)DSDGNPIAPSK | 1.2                       | 0.2803         |              | Yes                     |
| 299 | IPI00339468 | ATP-dependent RNA he      | Dhx9;Ddx9                | S137  | 1           | 16            | AEAEENNSGVESGYS     | AEAEENNSGVESGYS(0.00)   | AEAEENNSGVESGYS(ph)                        | CK1             | 0.6                       | 0.0006943      | Down         | Yes                     |
| 537 | IPI00761536 | Dedicator of cytokines    | Dock5;Lr2;Rlc            | S1765 | 1           | 1             | SLQLVDSR            | S(1)QLVDSR              | S(ph)QLVDSR                                | CAMK2           | 1.1                       | 0.49021        |              | Yes                     |
| 151 | IPI00816914 | Dedicator of cytokines    | Dock7;Gm430;Kiaa177      | S1422 | 1           | 3             | SPSGAFSGQENLR       | S(0.017)PS(0.982)GS     | SPS(ph)SGAFSGQENLR                         | PKA/AKT         | 1.3                       | 0.13156        |              | Yes                     |
| 595 | IPI00816914 | Dedicator of cytokines    | Dock7;Gm430;Kiaa177      | S896  | 1           | 1             | SLNSNPDISGTPSPDD    | S(0.456)LS(0.272)NS     | S(ph)LSNSNPDISGTPSPD                       | PKA/AKT         |                           |                |              | No                      |
| 347 | IPI00882020 | Putative uncharacterize   | Dpf2;Dpf2;Req;Ubid4      | S142  | 1           | 5             | VDDDSLGEFPVNSNR     | VDDDS(1)LGEFPVNSNR      | VDDDS(ph)LGEFPVNSNR                        | PLK             | 1.2                       | 0.33951        |              | Yes                     |
| 247 | IPI00857720 | Protein dpy-19 homolo     | Dpy19l1                  | S22   | 1           | 11            | SGPPPLSGASEVDAGELG  | S(0.626)S(0.374)PPPLS   | S(ph)SPPLSGASEVDAG                         | CK1             | 1.0                       | 0.25115        |              | No                      |
| 596 | IPI00406447 | Collapsin response me     | Dpysl3;Dpysl3;Drp3;Uli   | S635  | 1           | 11            | GGTPAGSTRGSPTRPNP   | GGT(0.001)PAGS(0.082)   | GGTPAGST(ph)RGSPTPR                        | CDK2            | 0.9                       |                |              | No                      |
| 146 | IPI00230692 | Bullous pemphigoid ant    | Dst;Bpag1;Dst;Bpag1;D    | S3240 | 1           | 5             | PHVCSDLR            | PHVCS(1)DLR             | PHVCS(ph)DLR                               |                 | 1.0                       | 0.1245         |              | Yes                     |
| 371 | IPI00118849 | Dual specificity tyrosine | Dyrk1a;Dyrk;Dyrk1a;RP    | Y321  | 1           | 4             | IYQYIQSR            | IYQY(1)QSR              | IYQY(ph)QSR                                |                 | 1.0                       | 0.35384        |              | Yes                     |
| 1   | IPI00223156 | Uncharacterized protei    | E130012A19Rik            | S19   | 2           | 10            | LAVPASPRGSPCPTPLK   | LAVPAS(0.086)PRG(S      | LAVPASPRGS(ph)PCSPTR                       | PKA             | 0.04                      | 1.54E-81       | Down         | Yes                     |
| 183 | IPI00848728 | Enhanced at puberty pr    | Eap1;Kiaa1865            | S584  | 1           | 3             | KASPEPPDASAESALK    | KAS(1)PEPPDASAESALK     | KAS(ph)PEPPDASAESALK                       | PKA/AKT         | 0.9                       | 0.16633        |              | Yes                     |
| 130 | IPI00848728 | Enhanced at puberty pr    | Eap1;Kiaa1865            | S696  | 1           | 4             | NSSSPVSPASVPGQR     | NS(0.001)S(0.003)S      | NSSS(ph)PVSPASVPGQR                        | Polo box        | 1.3                       | 0.10888        |              | Yes                     |
| 220 | IPI00467435 | ER degradation-enhanc     | Edem1;Edem               | S214  | 1           | 2             | DSTVQVFATIR         | DS(0.5)T(0.5)VQVFATI    | DS(ph)TVQVFATIR                            |                 | 0.9                       | 0.21204        |              | No                      |
| 202 | IPI00320208 | Elongation factor 1-bet   | Eef1b;Eef1b2             | S106  | 1           | 28            | YGPSSVEDTTGSGAADA   | YGPSSVEDTTGSGAADA       | YGPSSVEDTTGSGAADA                          | CK2             | 1.2                       | 0.18995        |              | Yes                     |
| 599 | IPI00320208 | Elongation factor 1-bet   | Eef1b;Eef1b2             | S90   | 1           | 12            | YGPSSVEDTTGSGAADA   | Y(0.103)GPS(0.1)S       | YGPSSVEDT(ph)TSGGAADAKDDDDIDLFGSDDEESEEAKK |                 |                           |                |              | No                      |
| 597 | IPI00320208 | Elongation factor 1-bet   | Eef1b;Eef1b2             | T87   | 1           | 9             | YGPSSVEDTTGSGAADA   | Y(0.103)GPS(0.1)S       | YGPSSVEDT(ph)TSGGA                         | FHA KAPP        |                           |                |              | No                      |
| 598 | IPI00320208 | Elongation factor 1-bet   | Eef1b;Eef1b2             | T88   | 1           | 10            | YGPSSVEDTTGSGAADA   | Y(0.103)GPS(0.1)S       | YGPSSVEDT(ph)TSGGAADAKDDDDIDLFGSDDEESEEAKK |                 |                           |                |              | No                      |
| 601 | IPI00944009 | Elongation factor 1-del   | Eef1d;Eef1d;Eef1d;Eef1   | S492  | 1           | 2             | LSSLEKSSPTPR        | LS(0.325)S(0.325)LEKS   | LS(ph)SLEKSSPTPR                           | PKA             |                           |                |              | No                      |
| 602 | IPI00944009 | Elongation factor 1-del   | Eef1d;Eef1d;Eef1d;Eef1   | S493  | 1           | 3             | LSSLEKSSPTPR        | LS(0.325)S(0.325)LEKS   | LS(ph)SLEKSSPTPR                           | CAMK2           |                           |                |              | No                      |
| 603 | IPI00944009 | Elongation factor 1-del   | Eef1d;Eef1d;Eef1d;Eef1   | S497  | 1           | 7             | LSSLEKSSPTPR        | LS(0.325)S(0.325)LEKS   | LS(ph)SLEKSSPTPR                           | NEK6            |                           |                |              | No                      |
| 262 | IPI00944009 | Elongation factor 1-del   | Eef1d;Eef1d;Eef1d;Eef1   | S498  | 1           | 8             | LSSLEKSSPTPR        | LS(0.001)SLEKS(0.07)    | SLSLEKSS(ph)PTPR                           | Polo box        | 1.0                       | 0.25683        |              | Yes                     |
| 523 | IPI00944009 | Elongation factor 1-del   | Eef1d;Eef1d;Eef1d;Eef1   | S512  | 1           | 10            | ATAPQTQHVSPMR       | ATAPQTQHV(1)PMR         | ATAPQTQHV(1)PMR                            | CDK2            | 1.1                       | 0.47902        |              | Yes                     |
| 115 | IPI00944009 | Elongation factor 1-del   | Eef1d;Eef1d;Eef1d;Eef1   | S541  | 1           | 18            | GATPAEDDEDKIDILFGS  | GATPAEDDEDKIDILFGS      | GATPAEDDEDKIDILFGS                         | CK2             | 1.3                       | 0.092139       |              | Yes                     |
| 400 | IPI00944009 | Elongation factor 1-del   | Eef1d;Eef1d;Eef1d;Eef1   | T508  | 1           | 6             | ATAPQTQHVSPMR       | AT(0.001)APQT(0.499)    | ATAPQT(ph)QHVSPM(ox)R                      |                 |                           |                |              | No                      |
| 422 | IPI00402968 | EH domain-containing      | Ehd2                     | S438  | 1           | 20            | MGPFVERGDEAIEDGE    | MGPFVERGDEAIEDGE        | MGPFVERGDEAIEDGEGS                         | (ph)EDDAEWWVTK  | 1.1                       | 0.39472        |              | Yes                     |
| 92  | IPI00402968 | EH domain-containing      | Ehd2                     | T447  | 1           | 29            | MGPFVERGDEAIEDGE    | MGPFVERGDEAIEDGE        | M(ox)GPFVERGDEAIEDGEGSEDDAEWVVT            | (ph)            | 1.4                       | 0.064192       |              | Yes                     |
| 364 | IPI00261239 | Translation initiation fa | Eif2b5                   | S540  | 1           | 3             | AGSPQLDDIR          | AGS(1)PQLDDIR           | AGS(ph)PQLDDIR                             | CAMK2           | 1.2                       | 0.34829        |              | Yes                     |
| 223 | IPI00229859 | Eukaryotic translation    | Eif3b;Eif3s9             | S75   | 1           | 14            | AKPAAQSEETATSPAAS   | AKPAAQSEETAT(0.003)     | AKPAAQSEETATS(ph)P                         | GSK3            | 0.9                       | 0.21569        |              | Yes                     |
| 604 | IPI00229859 | Eukaryotic translation    | Eif3b;Eif3s9             | S79   | 2           | 18            | AKPAAQSEETATSPAAS   | AKPAAQS(0.001)EET       | (0)AKPAAQSEETATS(ph)P                      | CK1             |                           |                |              | No                      |
| 605 | IPI00229859 | Eukaryotic translation    | Eif3b;Eif3s9             | T81   | 2           | 20            | AKPAAQSEETATSPAAS   | AKPAAQS(0.001)EET       | (0)AKPAAQSEETATS(ph)P                      | FHA KAPP        |                           |                |              | No                      |
| 345 | IPI00421179 | Eukaryotic translation    | Eif4g1;Eif4g1;Eif4g1;Eif | S1187 | 1           | 1             | SFSKEVEER           | S(1)FSKEVEER            | S(ph)FSKEVEER                              |                 | 1.2                       | 0.33736        |              | Yes                     |
| 120 | IPI00776162 | Eukaryotic translation    | Eif4g2;Nat1;Eif4g2;Nat   | T507  | 1           | 3             | TQTPPLGQTPQLGLK     | T(0.036)QT(0.958)PPLG   | TQTP(ph)PPLGQTPQLGLK                       | CAMK2           | 0.9                       | 0.097918       |              | Yes                     |
| 468 | IPI00756424 | Eukaryotic translation    | Eif5b;Iif2;Eif5b;Iif2    | S137  | 1           | 11            | TARPNSAEPLSGSEDA    | T(0.001)ARPNS(0.026)    | TARPNSAEPLS(ph)GSE                         | CK2             | 1.1                       | 0.43005        |              | Yes                     |
| 399 | IPI00756424 | Eukaryotic translation    | Eif5b;Iif2;Eif5b;Iif2    | S215  | 1           | 7             | SVPTVDSGNEDDSSFK    | SVPTVDS(1)GNEDDSS       | SVPTVDS(ph)GNEDDSS                         | CK2             | 1.0                       | 0.37228        |              | Yes                     |
| 607 | IPI00756424 | Eukaryotic translation    | Eif5b;Iif2;Eif5b;Iif2    | S223  | 3           | 15            | SVPTVDSGNEDDSSFK    | S(0.289)VPT(0.84)VDS    | (SVPT(ph)VDS(ph)GNE                        | PLK1            |                           |                |              | No                      |
| 606 | IPI00756424 | Eukaryotic translation    | Eif5b;Iif2;Eif5b;Iif2    | T212  | 3           | 4             | SVPTVDSGNEDDSSFK    | S(0.289)VPT(0.84)VDS    | (SVPT(ph)VDS(ph)GNE                        | CK1             |                           |                |              | Yes                     |
| 141 | IPI00309309 | RNA polymerase II elon    | Ell;Ell;mCG_23118        | S299  | 1           | 12            | KLCQPQNATDSSPPREH   | KLCQPQNATD(0.886)       | KLCQPQNATD(ph)SPPREHGR                     |                 | 1.3                       | 0.11973        |              | Yes                     |
| 219 | IPI00403406 | Epb4.112 protein;Erythr   | Epb4.112;Epb4.112        | S596  | 1           | 11            | ATPLPAEGKSSHETLNVV  | ATPLPAEGKS(0.071)S      | (0)ATPLPAEGKS(ph)HETLNVVEEK                |                 | 0.9                       | 0.20905        |              | Yes                     |
| 608 | IPI00229300 | Band 4.1-like protein 3;  | Epb4113;Dal1;Epb4.113;   | S749  | 1           | 8             | VESTSVGSISPGGAK     | VESTSVGS(0.5)S(0.5)P    | VESTSVGS(ph)ISPGGAK                        | CK1             |                           |                |              | No                      |
| 474 | IPI00229300 | Band 4.1-like protein 3;  | Epb4113;Dal1;Epb4.113;   | S751  | 1           | 10            | VESTSVGSISPGGAK     | VESTSVGS(0.077)S        | (0.9)VESTSVGS(ph)ISPGGAK                   |                 |                           | 0.44317        |              | Yes                     |

| No  | IPI Numbers | Protein Names            | Gene Names               | pAA   | Number of P | Position in p | Peptide Sequence    | Phospho (STY) Probabil   | Modified Sequence         | Best Motifs                                       | Ratio <sup>1</sup> of Phd | Ratio Signific | Up-/Down-reg | Phosphosites localized? |
|-----|-------------|--------------------------|--------------------------|-------|-------------|---------------|---------------------|--------------------------|---------------------------|---------------------------------------------------|---------------------------|----------------|--------------|-------------------------|
| 324 | IPI00420185 | Epidermal growth factor  | Egfr;Egfr;Egfr;Egfr;Egfr | S255  | 1           | 18            | STPSHGVSLSNSTGSLSP  | STPSHGVSLSNSTGSLSP       | STPSHGVSLSNSTGSLSP        | CDK1                                              | 1.2                       | 0.31583        |              | Yes                     |
| 392 | IPI00154109 | Protein FAM122A          | Fam122a                  | S73   | 1           | 8             | HGLLLPASVPR         | HGLLLPAS(1)PVR           | HGLLLPAS(ph)PVR           | WW GroupIV                                        | 1.1                       | 0.36679        |              | Yes                     |
| 208 | IPI00223670 | Protein FAM40A;Protein   | Fam40a;Kiaa1761;Fam40    | S335  | 1           | 3             | AASPPASASDLIEQQQK   | AAS(1)PPASASDLIEQQQK     | AAS(ph)PPASASDLIEQQQK     | CAMK2                                             | 0.9                       | 0.19813        |              | Yes                     |
| 276 | IPI00874398 | Protein FAM65A           | Fam65a;Kiaa1930          | S90   | 1           | 1             | SQSFAGVLGSHER       | S(0.644)QS(0.356)FAGV    | S(ph)QSFAFVGLGSHER        |                                                   | 1.0                       | 0.27455        |              | No                      |
| 129 | IPI00874398 | Protein FAM65A           | Fam65a;Kiaa1930          | S92   | 1           | 3             | SQSFAGVLGSHER       | S(0.176)QS(0.824)FAGV    | SQS(ph)FAGVGLGSHER        | PKD                                               | 0.9                       | 0.10656        |              | Yes                     |
| 292 | IPI00344835 | Protein FAM65C           | Fam65c                   | S24   | 1           | 3             | SASFAGFSAQSR        | S(0.081)AS(0.919)FAGF    | SAS(ph)FAGFSAQSR          | PKD                                               | 1.2                       | 0.28731        |              | Yes                     |
| 428 | IPI00757373 | Farp1 protein;Farp1 pr   | Farp1;Farp1              | S427  | 1           | 11            | ACTLELGHQPSALPK     | ACT(0.001)LELGHQPS(0)    | ACTLELGHQPS(ph)PALPK      |                                                   | 1.1                       | 0.39715        |              | Yes                     |
| 386 | IPI00757373 | Farp1 protein;Farp1 pr   | Farp1;Farp1;Farp1        | T24   | 1           | 11            | LGAPENSGISTLER      | LGAPENSGIS(0.06)T(0.9)   | LGAPENSGIST(ph)LER        |                                                   | 1.1                       | 0.36214        |              | Yes                     |
| 609 | IPI00929902 | Fas;Tumor necrosis fact  | Fas;Fas;Apt1;Tnfrsf6     | S217  | 1           | 8             | ETIPMNASNLNLSK      | ET(0.15)IPMNAS(0.297)    | ETIPM(ox)NAS(ph)NLSK      |                                                   |                           |                |              | No                      |
| 448 | IPI00929902 | Fas;Tumor necrosis fact  | Fas;Fas;Apt1;Tnfrsf6     | S220  | 1           | 11            | ETIPMNASNLNLSK      | ETIPMNAS(0.005)NLS(0)    | ETIPMNASNLNLSK            | CK1                                               | 1.1                       | 0.41371        |              | Yes                     |
| 610 | IPI00849967 | Putative uncharacterize  | Fez1                     | S150  | 4           | 9             | EEEEFNKSEKENDSGINEE | EEEEFNKES(0.271)ENDS     | EEEEFNKES(ph)ENDS(ph)     | GSK3                                              |                           |                |              | No                      |
| 611 | IPI00849967 | Putative uncharacterize  | Fez1                     | S154  | 4           | 13            | EEEEFNKSEKENDSGINEE | EEEEFNKES(0.271)ENDS     | EEEEFNKES(ph)ENDS(ph)     | CK1                                               |                           |                |              | No                      |
| 613 | IPI00849967 | Putative uncharacterize  | Fez1                     | S178  | 4           | 37            | EEEEFNKSEKENDSGINEE | EEEEFNKES(0.271)ENDS     | EEEEFNKES(ph)ENDS(ph)     | GINEEPLLTADQVIEIEEEM(ox)MQNSPDPPEEEEEVLEEDGGEISSQ |                           |                |              | No                      |
| 614 | IPI00849967 | Putative uncharacterize  | Fez1                     | S197  | 4           | 56            | EEEEFNKSEKENDSGINEE | EEEEFNKES(0.271)ENDS     | EEEEFNKES(ph)ENDS(ph)     | GINEEPLLTADQVIEIEEEM(ox)MQNSPDPPEEEEEVLEEDGGEISSQ |                           |                |              | No                      |
| 615 | IPI00849967 | Putative uncharacterize  | Fez1                     | S198  | 4           | 57            | EEEEFNKSEKENDSGINEE | EEEEFNKES(0.271)ENDS     | EEEEFNKES(ph)ENDS(ph)     | GSK3                                              |                           |                |              | No                      |
| 616 | IPI00849967 | Putative uncharacterize  | Fez1                     | S202  | 4           | 61            | EEEEFNKSEKENDSGINEE | EEEEFNKES(0.271)ENDS     | EEEEFNKES(ph)ENDS(ph)     | CK1                                               |                           |                |              | No                      |
| 247 | IPI00849967 | Putative uncharacterize  | Fez1                     | S220  | 4           | 79            | EEEEFNKSEKENDSGINEE | EEEEFNKES(0.271)ENDS     | EEEEFNKES(ph)ENDS(ph)     | GINEEPLLTADQVIEIEEEM                              | 1.2                       | 0.23641        |              | No                      |
| 612 | IPI00849967 | Putative uncharacterize  | Fez1                     | T163  | 4           | 22            | EEEEFNKSEKENDSGINEE | EEEEFNKES(0.271)ENDS     | EEEEFNKES(ph)ENDS(ph)     | GINEEPLLTADQVIEIEEEM(ox)MQNSPDPPEEEEEVLEEDGGEISSQ |                           |                |              | No                      |
| 617 | IPI00849967 | Putative uncharacterize  | Fez1                     | T212  | 4           | 71            | EEEEFNKSEKENDSGINEE | EEEEFNKES(0.271)ENDS     | EEEEFNKES(ph)ENDS(ph)     | GINEEPLLTADQVIEIEEEM(ox)MQNSPDPPEEEEEVLEEDGGEISSQ |                           |                |              | No                      |
| 618 | IPI00849967 | Putative uncharacterize  | Fez1                     | T214  | 4           | 73            | EEEEFNKSEKENDSGINEE | EEEEFNKES(0.271)ENDS     | EEEEFNKES(ph)ENDS(ph)     | NEK6                                              |                           |                |              | No                      |
| 82  | IPI00223046 | FH1/FH2 domain-conta     | Fhod1;Fhos1              | S370  | 1           | 1             | SLEGGGCPVR          | S(1)LEGGGCPVR            | S(ph)LEGGGCPVR            | AURORA                                            | 0.8                       | 0.055184       |              | Yes                     |
| 14  | IPI00664670 | Filamin-C;Gamma-filam    | FlnC;Abp1;Fln2;FlnC;Abp  | S2234 | 1           | 3             | LGSFGSITR           | LGS(1)FGSITR             | LGS(ph)FGSITR             | PKA/AKT                                           | 3.3                       | 2.696E-12      | Up           | Yes                     |
| 222 | IPI00664670 | Filamin-C;Gamma-filam    | FlnC;Abp1;Fln2;FlnC;Abp  | S2237 | 1           | 6             | LGSFGSITR           | LGSFGS(0.881)IT(0.119)   | LGSFGS(ph)ITR             | CK1                                               | 0.9                       | 0.21372        |              | Yes                     |
| 98  | IPI00652813 | Fn1 protein;Fibronectin  | Fn1;Fn1;Fn1              | S2359 | 1           | 24            | TNTNVNCPICFCMPLDV   | TNTNVNCPICFCMPLDV        | TNTNVNCPICFCMPLDV         | CAMK2                                             | 0.8                       | 0.072399       |              | Yes                     |
| 350 | IPI00119242 | Formin-binding protein   | Fnbp4;Fbp30;Kiaa1014     | S65   | 1           | 7             | RPILQLSPPGPR        | RPILQLS(1)PPGPR          | RPILQLS(ph)PPGPR          | NEK6                                              | 1.0                       | 0.34031        |              | Yes                     |
| 619 | IPI00170120 | Forkhead box protein N   | Foxn4                    | S217  | 2           | 3             | TGSLPVSEIYFNM       | T(0.999)GS(0.992)LPVS    | T(ph)GS(ph)LPVSEIYFNM     | GSK3                                              |                           |                |              | Yes                     |
| 410 | IPI00338635 | FERM domain-containi     | FrmD6;FrmD6              | S544  | 1           | 4             | HLSLDDDIR           | HLS(1)LDDDIR             | HLSL(ph)LDDDIR            |                                                   | 1.0                       | 0.38347        |              | Yes                     |
| 620 | IPI00224112 | Fibroblast growth facto  | Frs2;Frs2a               | S327  | 1           | 3             | LTSTSTSDTQININNSAQR | LT(0.391)S(0.391)T(0.06) | LT(ph)S(ph)TSDTQININNSAQR | PKA/AKT                                           |                           |                |              | No                      |
| 163 | IPI00224112 | Fibroblast growth facto  | Frs2;Frs2a               | S331  | 1           | 9             | GRLTSTSTSDTQININNSA | GRLT(0.003)S(0.003)T(0)  | GRLTSTSTSDTQININNSA       | CK1                                               | 1.3                       | 0.14169        |              | Yes                     |
| 30  | IPI00224112 | Fibroblast growth facto  | Frs2;Frs2a               | T326  | 1           | 4             | GRLTSTSTSDTQININNSA | GRLT(0.805)S(0.154)T(0)  | GRLTSTSTSDTQININNSA       | PKA                                               | 1.8                       | 0.0012258      | Up           | Yes                     |
| 621 | IPI00224112 | Fibroblast growth facto  | Frs2;Frs2a               | T328  | 1           | 4             | LTSTSTSDTQININNSAQR | LT(0.32)S(0.32)T(0.32)   | LT(ph)S(ph)TSDTQININNSAQR | NEK6                                              |                           |                |              | No                      |
| 248 | IPI00122521 | Fragile X mental retard  | Fxr1;Fxr1h;Fxr1;Fxr1h    | S643  | 1           | 9             | AINGPPTSASGDEIPKLR  | AINGP(0.002)S(0.113)     | AINGP(ox)S(ph)GDEIPKLR    | CK2                                               | 1.2                       | 0.23921        |              | Yes                     |
| 135 | IPI00126389 | Fragile X mental retard  | Fxr2;Fxr2h;RP23-422L1    | S603  | 2           | 4             | TDGSIQDRQPVTVADYI   | T(0.288)DGS(0.856)IS(0)  | TDGSIQDRQPVTVADYI         | PLK1                                              | 1.3                       | 0.11611        |              | Yes                     |
| 136 | IPI00126389 | Fragile X mental retard  | Fxr2;Fxr2h;RP23-422L1    | S605  | 2           | 6             | TDGSIQDRQPVTVADYI   | T(0.234)DGS(0.808)IS(0)  | TDGSIQDRQPVTVADYI         |                                                   | 1.3                       | 0.11611        |              | Yes                     |
| 622 | IPI00130455 | Phospholemmann;FXD       | Fxyd1;Plm                | S82   | 1           | 13            | TGEPDEEETFRSSIR     | TGEPDEEETFRS(0.5)S(0)    | TGEPDEEETFRS(ph)SIR       |                                                   |                           |                |              | No                      |
| 259 | IPI00130455 | Phospholemmann;FXD       | Fxyd1;Plm                | S83   | 1           | 14            | TGEPDEEETFRSSIR     | TGEPDEEETFRS(0.374)      | TGEPDEEETFRS(ph)SIR       | AURORA                                            | 1.0                       | 0.25183        |              | No                      |
| 546 | IPI00130095 | Ras GTPase-activating p  | G3bp1;G3bp;G3bp1;G3      | S229  | 1           | 1             | STSPAPADVAPAEQDLR   | S(0.564)T(0.218)S(0.21)  | S(ph)TSPAPADVAPAEQDLR     |                                                   | 1.1                       | 0.49147        |              | No                      |
| 66  | IPI00124245 | Ras GTPase-activating p  | G3bp2;G3bp2              | S225  | 1           | 1             | SATPPPAEASLPQEPKP   | S(0.956)AT(0.044)PPPA    | S(ph)ATPPPAEASLPQEPKP     |                                                   | 0.8                       | 0.032515       | Down         | No                      |
| 207 | IPI00406371 | Glucosamine-fructose     | Gfpt1;Gfpt;Gfpt1;Gfpt    | S259  | 1           | 3             | VDSITCLFPVEEK       | VDS(0.993)T(0.006)T(0)   | VDS(ph)TCLFPVEEK          | CHK1/2                                            | 0.9                       | 0.19754        |              | Yes                     |
| 312 | IPI00473912 | PERQ amino acid-rich w   | Gigyf2;Kiaa0642;Perq2    | S26   | 1           | 10            | ALSSGGISITPPLSPALPK | ALSSGGISIT(0.132)S(0.8)  | ALSSGGISIT(ph)PPLSPA      | CK1                                               | 1.0                       | 0.30792        |              | Yes                     |
| 441 | IPI00473912 | PERQ amino acid-rich w   | Gigyf2;Kiaa0642;Perq2    | T383  | 1           | 21            | AGAEASEEVPQTSLSAR   | AGAEASEEVPQTSLS(0.0)     | AGAEASEEVPQTSLSAR         | ERK/MAPK                                          | 1.0                       | 0.4078         |              | Yes                     |
| 2   | IPI00749815 | similar to DNA cytosine  | Gm14490                  | S290  | 1           | 12            | RTTNDPAASESPPPKR    | RTTNDPAASES(0.013)S(0)   | RTTNDPAASES(ph)PPKR       | Polo box                                          | 0.04                      | 2.182E-80      | Down         | Yes                     |
| 270 | IPI00222461 | Guanine nucleotide-bin   | Gnl3;Ns;Gnl3;Ns          | S505  | 1           | 3             | ELSPQSTAGKPSDSSA    | ELS(0.914)PQ(0.058)      | ELS(ph)PQSTAGKPSDSSA      | CAMK2                                             | 1.0                       | 0.2668         |              | Yes                     |
| 623 | IPI00222461 | Guanine nucleotide-bin   | Gnl3;Ns;Gnl3;Ns          | S509  | 1           | 21            | NAEISDVAVPEETRELSPE | NAEISDVAVPEET(0.153)     | NAEISDVAVPEETRELSPE       | CK1                                               |                           |                |              | No                      |
| 624 | IPI00138860 | Golgin subfamily A men   | Golga4;Golga4;Golga4     | T39   | 1           | 1             | TSSFTDQLDDVTPNR     | T(0.394)S(0.202)S(0.20)  | T(ph)SSFTDQLDDVTPNR       | PKA/AKT                                           |                           |                |              | No                      |
| 157 | IPI00131457 | Probable G-protein cou   | Gpr124;Tem5              | S1104 | 1           | 10            | ALPTATEDGSPVLGEGPA  | ALPTATEDGS(1)PVLGEG      | ALPTATEDGS(ph)PVLGEG      | CK1                                               | 0.9                       | 0.13382        |              | Yes                     |
| 72  | IPI00648141 | Glycogen synthase kina   | Gsk3a;Gsk3b              | Y279  | 1           | 7             | GEPNVSYICSR         | GEPNVSY(0.02)Y(0.998)    | GEPNVSY(ph)ICSR           |                                                   | 0.8                       | 0.041235       | Down         | No                      |
| 625 | IPI00113686 | General transcription fa | Gtf2i;Bap135;Diws1;G     | S674  | 1           | 1             | SPGNSKVPVEIETVGGP   | S(0.498)P(0.41)NS(0)     | S(ph)PNSKVPVEIETVGGP      | WW GroupIV                                        |                           |                |              | No                      |
| 309 | IPI00340529 | General transcription fa | Gtf3c3;AL022818          | S42   | 1           | 3             | GKSSPKENPDDSEVPSSS  | GKS(0.864)S(0.136)PKE    | GKS(ph)SPKENPDDSEVPSSS    | GIDSAK                                            | 1.0                       | 0.30677        |              | Yes                     |
| 626 | IPI00340529 | General transcription fa | Gtf3c3;AL022818          | S43   | 1           | 4             | GKSSPKENPDDSEVPSSS  | GKS(0.286)S(0.286)PKE    | GKS(ph)SPKENPDDSEVPSSS    | Polo box                                          |                           |                |              | No                      |
| 627 | IPI00340529 | General transcription fa | Gtf3c3;AL022818          | S51   | 1           | 12            | GKSSPKENPDDSEVPSSS  | GKS(0.286)S(0.286)PKE    | GKS(ph)SPKENPDDSEVPSSS    | GSK3                                              |                           |                |              | No                      |
| 628 | IPI00378480 | Core histone macro-H2    | H2afy;H2afy;H2afy        | S170  | 4           | 3             | AASADSTTEGTPDGFV    | AA(0.441)ADS(0.441)T     | AA(ox)ADS(ph)T(ph)T       | PKD                                               |                           |                |              | No                      |
| 629 | IPI00378480 | Core histone macro-H2    | H2afy;H2afy;H2afy        | S173  | 4           | 6             | AASADSTTEGTPDGFV    | AA(0.441)ADS(0.441)T     | AA(ox)ADS(ph)T(ph)T       | CK2                                               |                           |                |              | No                      |
| 634 | IPI00378480 | Core histone macro-H2    | H2afy;H2afy;H2afy        | S187  | 4           | 20            | AASADSTTEGTPDGFV    | AA(0.441)ADS(0.441)T     | AA(ox)ADS(ph)T(ph)T       | EGTPTDGFVLSTK                                     |                           |                |              | No                      |
| 630 | IPI00378480 | Core histone macro-H2    | H2afy;H2afy;H2afy        | T174  | 4           | 7             | AASADSTTEGTPDGFV    | AA(0.441)ADS(0.441)T     | AA(ox)ADS(ph)T(ph)T       | EGTPTDGFVLSTK                                     |                           |                |              | No                      |
| 631 | IPI00378480 | Core histone macro-H2    | H2afy;H2afy;H2afy        | T175  | 4           | 8             | AASADSTTEGTPDGFV    | AA(0.441)ADS(0.441)T     | AA(ox)ADS(ph)T(ph)T       | EGTPTDGFVLSTK                                     |                           |                |              | No                      |
| 543 | IPI00378480 | Core histone macro-H2    | H2afy;H2afy;H2afy        | T178  | 1           | 11            | AASADSTTEGTPDGFV    | AA(0.001)T(0.001)        | AASADSTTEGTPDGFV          | FHA1 Rad53p                                       | 1.1                       | 0.49074        |              | Yes                     |
| 632 | IPI00378480 | Core histone macro-H2    | H2afy;H2afy;H2afy        | T180  | 4           | 13            | AASADSTTEGTPDGFV    | AA(0.441)ADS(0.441)T     | AA(ox)ADS(ph)T(ph)T       | EGTPTDGFVLSTK                                     |                           |                |              | No                      |
| 633 | IPI00378480 | Core histone macro-H2    | H2afy;H2afy;H2afy        | T184  | 4           | 17            | AASADSTTEGTPDGFV    | AA(0.441)ADS(0.441)T     | AA(ox)ADS(ph)T(ph)T       | FHA KAPP                                          |                           |                |              | No                      |
| 635 | IPI00378480 | Core histone macro-H2    | H2afy;H2afy;H2afy        | T188  | 4           | 21            | AASADSTTEGTPDGFV    | AA(0.441)ADS(0.441)T     | AA(ox)ADS(ph)T(ph)T       | FHA2 Rad53p                                       |                           |                |              | No                      |
| 377 | IPI00117011 | Hematopoietic lineage    | Hcls1;Hs1;Hcls1          | S112  | 2           | 16            | SAVGHEYVADVEKHSSQ   | S(0.958)AVGHEY(0.042)    | S(ph)AVGHEYVADVEKHSSQ     | PKD                                               | 1.1                       | 0.35916        |              | Yes                     |
| 331 | IPI00117011 | Hematopoietic lineage    | Hcls1;Hs1;Hcls1          | S97   | 2           | 1             | SAVGHEYVADVEKHSSQ   | S(0.958)AVGHEY(0.042)    | S(ph)AVGHEYVADVEKHSSQ     | QTDAAR                                            | 1.2                       | 0.31943        |              | Yes                     |
| 492 | IPI00114232 | Histone deacetylase 1    | Hdac1                    | S393  | 1           | 22            | MLPHAPGVQMQAIPED    | MLPHAPGVQMQAIPED         | M(ox)LPHPAGVQMQAIPED      | CK2                                               | 1.1                       | 0.45695        |              | Yes                     |
| 511 | IPI00114232 | Histone deacetylase 1    | Hdac1                    | S421  | 2           | 8             | IACEEFSDSDEEGGRR    | IACEEFS(1)DS(1)DEEG      | IACEEFS(ph)DS(ph)DEEG     | GRRK                                              | 1.1                       | 0.47198        |              | Yes                     |
| 512 | IPI00114232 | Histone deacetylase 1    | Hdac1                    | S423  | 2           | 10            | IACEEFSDSDEEGGRR    | IACEEFS(1)DS(1)DEEG      | IACEEFS(ph)DS(ph)DEEG     | CK2                                               | 1.1                       | 0.47198        |              | Yes                     |
| 549 | IPI00137668 | Histone deacetylase 2;   | Hdac2;Yy1bp              | S394  | 1           | 22            | MLPHAPGVQMQAIPED    | MLPHAPGVQMQAIPED         | MLPHAPGVQMQAIPED          | CK2                                               | 1.1                       | 0.49234        |              | Yes                     |

| No  | IPI Numbers | Protein Names                      | Gene Names               | pAA   | Number of P | Position in p | Peptide Sequence   | Phospho (STY) Probabil  | Modified Sequence     | Best Motifs           | Ratio <sup>1</sup> of Phd | Ratio Signific | Up-/Down-reg | Phosphosites localized? |
|-----|-------------|------------------------------------|--------------------------|-------|-------------|---------------|--------------------|-------------------------|-----------------------|-----------------------|---------------------------|----------------|--------------|-------------------------|
| 175 | IPI00137668 | Histone deacetylase 2; Hdac2;Yy1bp | Hdac2;Yy1bp              | S422  | 2           | 8             | IACDEEFSDEDEGEGR   | IACDEEFS(1)DS(1)EDEG    | IACDEEFS(ph)DS(ph)ED  | CK2                   | 1.3                       | 0.15866        |              | Yes                     |
| 176 | IPI00137668 | Histone deacetylase 2; Hdac2;Yy1bp | Hdac2;Yy1bp              | S424  | 2           | 10            | IACDEEFSDEDEGEGR   | IACDEEFS(1)DS(1)EDEG    | IACDEEFS(ph)DS(ph)ED  | CK2                   | 1.3                       | 0.15866        |              | Yes                     |
| 551 | IPI00313817 | Hepatoma-derived gro               | Hdgf;Tdrn1               | S165  | 1           | 9             | RAGDVLEDS(1)PK     | RAGDVLEDS(1)PK          | RAGDVLEDS(ph)PK       | CK2                   | 1.1                       | 0.49303        |              | Yes                     |
| 413 | IPI00313817 | Hepatoma-derived gro               | Hdgf;Tdrn1               | S202  | 1           | 5             | NSTPSEPDGQGGPAEE   | NS(0.023)T(0.136)PS(0.  | NSTPS(ph)EPDGGQGGP    | CK1                   | 1.0                       | 0.38531        |              | Yes                     |
| 636 | IPI00313817 | Hepatoma-derived gro               | Hdgf;Tdrn1               | S206  | 1           | 9             | NSTPSEPDGQGGPAEE   | NS(0.132)T(0.132)PS(0.  | NSTPS(ph)EPDGGQGGP    | CK1                   |                           |                |              | No                      |
| 38  | IPI00116442 | Hepatoma-derived gro               | Hdgfrp2;Hdgfrp2          | S644  | 1           | 10            | GGSEELHDS(1)PRNS   | GGSEELHDS(1)PRNS        | GGSEELHDS(ph)PRNS     | CDK1                  | 0.7                       | 0.0091446      | Down         | Yes                     |
| 174 | IPI00420246 | HEAT repeat-containing             | Heatr6                   | S646  | 1           | 15            | TFPAGSLEEAASLSPK   | TFPAGSLEEAASL(0.009     | TFPAGSLEEAASL(ph)P    | Polo box              | 0.9                       | 0.15844        |              | Yes                     |
| 210 | IPI00331597 | Histone H1.3;H1 VAR.4              | Hist1h1d;H1f3            | S62   | 2           | 1             | SETAPAAPAAPAPVEK   | S(1)ET(1)APAAPAAPAP     | S(ph)ET(ph)APAAPAAPV  | PKA                   | 1.2                       | 0.19929        |              | Yes                     |
| 419 | IPI00623776 | Histone H4                         | Hist1h4a;Hist1h4b;H4     | S103  | 1           | 3             | RISGLIYEETR        | RIS(1)GLIYEETR          | RIS(ph)GLIYEETR       | PKA                   | 1.1                       | 0.39185        |              | Yes                     |
| 271 | IPI00314240 | High mobility group prc            | Hmg1a;Hmgi;Hmgiy;Hn      | S102  | 2           | 14            | KLEKEEEEGISQESSEEE | KLEKEEEEGISQES(1)S(1)   | KLEKEEEEGISQES(ph)S   | CK2                   | 1.2                       | 0.26859        |              | Yes                     |
| 272 | IPI00314240 | High mobility group prc            | Hmg1a;Hmgi;Hmgiy;Hn      | S103  | 2           | 15            | KLEKEEEEGISQESSEEE | KLEKEEEEGISQES(1)S(1)   | KLEKEEEEGISQES(ph)S   | CK2                   | 1.2                       | 0.26859        |              | Yes                     |
| 556 | IPI00338745 | Non-histone chromoso               | Hmgn1;Hmg-14;Hmg14       | S84   | 2           | 23            | QADVADQQTTELPAEN   | QADVADQQT(0.001)T(0.    | QADVADQQTTELPAEN      | CK1                   | 1.1                       | 0.4994         |              | No                      |
| 206 | IPI00338745 | Non-histone chromoso               | Hmgn1;Hmg-14;Hmg14       | S87   | 2           | 26            | QADVADQQTTELPAEN   | QADVADQQT(0.001)T(0.    | QADVADQQTTELPAEN      | CK2                   | 1.2                       | 0.19612        |              | No                      |
| 111 | IPI00338745 | Non-histone chromoso               | Hmgn1;Hmg-14;Hmg14       | S95   | 1           | 34            | QADVADQQTTELPAEN   | QADVADQQTTELPAEN        | QADVADQQTTELPAEN      | GETENQSPASEEKEAKS     | 1.3                       | 0.088666       |              | Yes                     |
| 637 | IPI00338745 | Non-histone chromoso               | Hmgn1;Hmg-14;Hmg14       | T80   | 2           | 19            | QADVADQQTTELPAEN   | QADVADQQTTELPAEN        | QADVADQQTTELPAEN      | GET(ph)ENQSPASEEKEAKS |                           |                |              | No                      |
| 54  | IPI00314755 | Hematological and neu              | Hn1                      | S87   | 1           | 3             | SNSSEASSGDFLDLK    | S(0.011)NS(0.983)S(0.   | SNS(ph)SEASSGDFLDLK   | CAMK2                 | 0.8                       | 0.02151        | Down         | Yes                     |
| 397 | IPI00553777 | Heterogeneous nuclear              | Hnrnpa1;Fli-2;Hnrpa1;    | S4    | 1           | 1             | SESPKEPEQLR        | S(0.959)ES(0.041)PKEP   | S(ph)JESPKPEQLR       |                       | 1.0                       | 0.37078        |              | Yes                     |
| 269 | IPI00553777 | Heterogeneous nuclear              | Hnrnpa1;Fli-2;Hnrpa1;    | S6    | 1           | 3             | SESPKEPEQLR        | S(0.007)ES(0.993)PKEP   | SES(ph)PKEPEQLR       | CDK1                  | 1.2                       | 0.26534        |              | Yes                     |
| 256 | IPI00224729 | Heterogeneous nuclear              | Hnrnp1;Hnrph1;RP23;      | S104  | 1           | 6             | HTGPNSPDTANDGFVR   | HTGPNNS(0.992)PDT(0.    | HTGPNNS(ph)PDTANDGF   | WW GroupIV            | 1.2                       | 0.24584        |              | Yes                     |
| 216 | IPI00224729 | Heterogeneous nuclear              | Hnrnp1;Hnrph1;RP23;      | T107  | 1           | 9             | HTGPNSPDTANDGFVR   | HTGPNNS(0.008)PDT(0.    | HTGPNNS(ph)PDTANDGF   | FHA1 Rad53p           | 1.2                       | 0.20495        |              | Yes                     |
| 199 | IPI00229080 | Heat shock protein 84b             | Hsp90ab1;Hsp84b;Hsp      | S255  | 1           | 6             | IEDVGSDEEDDSGDKK   | IEDVGS(1)DEEDDSGDKD     | IEDVGS(ph)DEEDDSGDK   | CK2                   | 1.3                       | 0.18597        |              | Yes                     |
| 365 | IPI00229080 | Heat shock protein 84b             | Hsp90ab1;Hsp84b;Hsp      | S261  | 1           | 12            | IEDVGSDEEDDSGDKK   | IEDVGS(0.5)DEEDDS(0.    | IEDVGS(ph)DEEDDSGDK   | CK2                   | 1.0                       | 0.35149        |              | No                      |
| 490 | IPI00123802 | Heat shock protein 105             | Hsp11;Hsp105;Hsp110;     | S810  | 1           | 3             | IESPKLER           | IES(1)PKLER             | IES(ph)PKLER          | CDK1                  | 1.1                       | 0.45577        |              | Yes                     |
| 232 | IPI00221566 | HIV Tat-specific factor            | Htatsf1                  | S645  | 1           | 6             | VFDSDSDIEEEEADEE   | VFDSDSD(1)DDIEEEEADE    | VFDSDSD(ph)DDIEEEEADE | CECEDADKCEDNDID       | 1.2                       | 0.2223         |              | Yes                     |
| 319 | IPI00463909 | E3 ubiquitin-protein lig           | Huwe1;Klaa0312;Ureb1     | S1907 | 1           | 6             | GSSTASDDEFENLR     | GS(0.004)GT(0.004)AS    | GSSTAS(ph)DDEFENLR    | CK2                   | 1.0                       | 0.31334        |              | Yes                     |
| 357 | IPI00120225 | Insulin-like growth fact           | Igf1r                    | S1260 | 1           | 4             | MRPSFLEIIGSIK      | MRPS(1)FLEIIGSIK        | M(ox)RPS(ph)FLEIIGSIK | PKA                   | 1.2                       | 0.34515        |              | Yes                     |
| 461 | IPI00120225 | Insulin-like growth fact           | Igf1r                    | S1267 | 1           | 11            | MRPSFLEIIGSIK      | MRPS(0.126)FLEIIGS(0.   | M(ox)RPSFLEIIGS(ph)IK |                       | 1.1                       | 0.4239         |              | Yes                     |
| 638 | IPI00308971 | Cation-independent ma              | Igf2r                    | S2476 | 1           | 8             | LVSFHDDSDDELLHI    | LVSFHDDSD(1)DEDLHI      | LVSFHDDSD(ph)DEDLHI   |                       |                           |                |              | Yes                     |
| 639 | IPI00124436 | Interleukin-22 receptor            | Il22ra1                  | S420  | 2           | 8             | DSTPGILSTPKYLTKT   | DSTPGILS(0.876)T(0.12)  | DSTPGILS(ph)TPKY(ph)L | LTKT                  |                           |                |              | Yes                     |
| 640 | IPI00124436 | Interleukin-22 receptor            | Il22ra1                  | Y424  | 2           | 12            | DSTPGILSTPKYLTKT   | DSTPGILS(0.876)T(0.12)  | DSTPGILS(ph)TPKY(ph)E | EGFR                  |                           |                |              | Yes                     |
| 439 | IPI00308094 | Integrator complex sub             | Ints3;Ints3              | S500  | 1           | 11            | EKFPEFCSSPPVVEK    | EKFPEFC(0.011)S(0.04)   | EKFPEFCSSPS(ph)PPVE   | CK1                   | 1.1                       | 0.40553        |              | Yes                     |
| 491 | IPI00468004 | IQ domain-containing p             | Iqce;Iqce                | S661  | 1           | 12            | ETVSLTPSGASPPSLR   | ETVSLTPS(0.001)GS(0.    | ETVSLTPSGAS(ph)PPSL   | CK1                   | 1.1                       | 0.4559         |              | No                      |
| 641 | IPI00854942 | Putative uncharacterize            | Irf2bp2                  | S419  | 1           | 4             | RPASVSSAAAEHEAR    | RPAS(0.462)VS(0.462)S   | RPAS(ph)VSSAAAEHEAR   | CAMK2                 | 2.2                       | 3.864E-06      | Up           | Yes                     |
| 23  | IPI00854942 | Putative uncharacterize            | Irf2bp2                  | S421  | 1           | 6             | RPASVSSAAAEHEAR    | RPAS(0.141)VS(0.841)S   | RPASV(ph)VSSAAAEHEAR  |                       | 0.8                       | 0.040344       | Down         | Yes                     |
| 71  | IPI00854942 | Putative uncharacterize            | Irf2bp2                  | S536  | 1           | 4             | RKPSPEPEGEVGPVK    | RKPS(1)PEPEGEVGPVK      | RKPS(ph)PEPEGEVGPVK   | PKA/AKT               | 2.2                       | 0.040344       | Down         | Yes                     |
| 642 | IPI00119627 | Insulin receptor substra           | Irs1;Irs-1;Irs1;mCG_203  | S1096 | 1           | 2             | HSSETFSAPTR        | HS(0.49)S(0.49)ET(0.01) | HS(ph)SETFSAPTR       | PKA                   |                           |                |              | No                      |
| 417 | IPI00119627 | Insulin receptor substra           | Irs1;Irs-1;Irs1;mCG_203  | S1097 | 1           | 3             | HSSETFSAPTR        | HS(0.065)S(0.934)ET(0.  | HSS(ph)JTFFSAPTR      | PIM1/2                | 1.1                       | 0.38948        |              | Yes                     |
| 166 | IPI00923679 | Insulin receptor substra           | Irs2;Irs2                | S1165 | 1           | 5             | HNSASVENVSLR       | HNS(0.007)AS(0.993)VE   | HNSAS(ph)VENVSLR      |                       | 0.9                       | 0.14548        |              | Yes                     |
| 643 | IPI00923679 | Insulin receptor substra           | Irs2;Irs2                | S515  | 1           | 1             | SNTPESIAETPPAR     | S(0.941)NT(0.059)PESIA  | S(ph)NTPESIAETPPAR    | CK1                   |                           |                |              | Yes                     |
| 124 | IPI00923679 | Insulin receptor substra           | Irs2;Irs2                | T517  | 1           | 3             | SNTPESIAETPPAR     | S(0.104)NT(0.896)PESIA  | SNT(ph)PESIAETPPAR    | CAMK2                 | 1.3                       | 0.10202        |              | Yes                     |
| 554 | IPI00410790 | Iroquois-class homeod              | Irx1;Irx1a;Irx1          | S267  | 1           | 4             | DQSSPLSAAETLK      | DQS(0.006)S(0.993)PLS   | DQSS(ph)PLSAAETLK     | Polo box              | 1.1                       | 0.49435        |              | Yes                     |
| 195 | IPI00856218 | Iron-sulfur cluster asse           | Iscu;Nifun               | S15   | 1           | 4             | RAASALLLR          | RAAS(1)ALLLR            | RAAS(ph)ALLLR         | CHK1/2                | 0.9                       | 0.17898        |              | Yes                     |
| 644 | IPI00649251 | Integrin beta-4;Integrin           | Irgb4;Irgb4;Irgb4;RP23-  | S1086 | 1           | 6             | FQVQLSNPK          | FQVQLS(1)NPK            | FQVQLS(ph)NPK         |                       |                           |                |              | Yes                     |
| 645 | IPI00831223 | Intersectin-1;EH and SH            | Itns1;Ese1;Itns1;Itns1;E | S900  | 1           | 12            | SAFTPATATGSSPVLG   | SAFTPATATGS(0.044)S     | SAFTPATATGSS(ph)PSP   | Polo box              |                           |                |              | No                      |
| 95  | IPI00831223 | Intersectin-1;EH and SH            | Itns1;Ese1;Itns1;Itns1;E | S902  | 1           | 14            | SAFTPATATGSSPVLG   | SAFTPATATGS(0.015)S     | SAFTPATATGSS(ph)PSP   | CK1                   | 0.8                       | 0.064821       |              | Yes                     |
| 544 | IPI00122143 | Tyrosine-protein kinase            | Jak2                     | S523  | 1           | 10            | TNGISDVQISPTLQR    | TNGISDVQIS(0.5)PT(0.5)  | TNGISDVQIS(ph)PTLQR   |                       | 1.1                       | 0.49101        |              | No                      |
| 545 | IPI00122143 | Tyrosine-protein kinase            | Jak2                     | T525  | 1           | 12            | TNGISDVQISPTLQR    | TNGISDVQIS(0.5)PT(0.5)  | TNGISDVQIS(ph)PTLQR   |                       | 1.1                       | 0.49101        |              | No                      |
| 172 | IPI00469103 | Lysyl-tRNA synthetase;             | Kars;Kars                | S422  | 1           | 3             | RISMVEELEK         | RIS(1)MVEELEK           | RIS(ph)MVEELEK        | AURORA-A              | 0.9                       | 0.15608        |              | Yes                     |
| 45  | IPI00381078 | Uncharacterized protei             | Klaa1712                 | S292  | 2           | 11            | VTLLETMLLSK        | VTLLET(1)EMLLS(1)K      | VTLLET(ph)EMLLS(ph)K  |                       | 0.7                       | 0.013382       | Down         | Yes                     |
| 44  | IPI00381078 | Uncharacterized protei             | Klaa1712                 | T287  | 2           | 6             | VTLLETMLLSK        | VTLLET(1)EMLLS(1)K      | VTLLET(ph)EMLLS(ph)K  | NEK6                  | 0.7                       | 0.013382       | Down         | Yes                     |
| 464 | IPI00411082 | Kinesin-like protein KIF           | Kif1b;Kif1b              | S1057 | 1           | 4             | SGLSLEELR          | SGLS(1)LEELR            | SGLS(ph)LEELR         | CK2                   | 1.0                       | 0.42554        |              | Yes                     |
| 53  | IPI00753928 | Klc2 protein;Kinesin lig           | Klc2;mCG_8395;Klc2       | S579  | 1           | 3             | ASSLNFNLK          | AS(0.049)S(0.951)NFLN   | ASS(ph)NFLNLK         | PKA                   | 0.7                       | 0.017685       | Down         | Yes                     |
| 483 | IPI00230429 | Importin subunit alpha             | Kpna3;Qip2;Kpna3         | S60   | 1           | 11            | NVPQEESLESDVDADF   | NVPQEESLEDS(1)DVDA      | NVPQEESLEDS(ph)DVD    | NEK6                  | 1.1                       | 0.4497         |              | Yes                     |
| 337 | IPI00929786 | La-related protein 1;La            | Larp1;Kiaa0731;Larp      | S81   | 1           | 15            | ESPRPAAAEAPAGSDG   | ESPRPAAAEAPAGS(1)T      | ESPRPAAAEAPAGS(ph)    | CK2                   | 1.0                       | 0.32485        |              | Yes                     |
| 646 | IPI00929786 | La-related protein 1;La            | Larp1;Kiaa0731;Larp      | T503  | 1           | 3             | AVTPVPKTEEVSNLK    | AVT(0.499)PVPT(0.499)   | AVT(ph)PVPTKTEEVSNL   | CAMK2                 |                           |                |              | No                      |
| 647 | IPI00929786 | La-related protein 1;La            | Larp1;Kiaa0731;Larp      | T507  | 1           | 7             | AVTPVPKTEEVSNLK    | AVT(0.499)PVPT(0.499)   | AVT(ph)PVPTKTEEVSNL   | CK2                   |                           |                |              | No                      |
| 453 | IPI00112339 | LIM domain and actin-b             | Lima1;D15Ert366E;Epl     | S360  | 1           | 13            | SEAQQPMHPKPLSPDAR  | SEAQQPMHPKPLS(1)PD      | SEAQQPM(ox)HPKPLS     | WW GroupIV            | 1.0                       | 0.42056        |              | Yes                     |
| 415 | IPI00112339 | LIM domain and actin-b             | Lima1;D15Ert366E;Epl     | S488  | 1           | 22            | SDNEETLGRPAQPPNAG  | SDNEETLGRPAQPPNAG       | SDNEETLGRPAQPPNAG     | WW GroupIV            | 1.0                       | 0.38831        |              | Yes                     |
| 226 | IPI00620256 | Lamin-A/C                          | Lmna;Lmn1                | S573  | 1           | 5             | GSHCSGSDPAEYNLR    | GS(0.003)HCS(0.997)G    | GSHCS(ph)GSDPAEYN     | CK1                   | 0.9                       | 0.22           |              | Yes                     |
| 484 | IPI00620256 | Lamin-A/C                          | Lmna;Lmn1                | S633  | 1           | 5             | SVGGSGGSGFDNLVTR   | S(0.004)VGGSG(0.996)G   | SVGGSGGSG(ph)GSGFDNL  | GSK3                  | 1.1                       | 0.44989        |              | Yes                     |
| 246 | IPI00620256 | Lamin-A/C                          | Lmna;Lmn1                | S637  | 1           | 9             | SVGGSGGSGFDNLVTR   | SVGGSGGSGS(1)FGDNLV     | SVGGSGGSGS(ph)FGDNL   | CK1                   | 1.0                       | 0.23435        |              | Yes                     |
| 534 | IPI00620256 | Lamin-A/C;Lamin-A/C;L              | Lmna;Lmn1;Lmna;Lmn1      | S390  | 1           | 4             | LRLSPSPTSQR        | LRLS(0.885)PS(0.099)PT  | LRLS(ph)PSPTSQR       | PKA                   | 1.1                       | 0.48753        |              | Yes                     |
| 336 | IPI00620256 | Lamin-A/C;Lamin-A/C;L              | Lmna;Lmn1;Lmna;Lmn1      | S392  | 1           | 4             | LRLSPSPTSQR        | LS(0.001)PS(0.99)PT(0.  | LRLSPS(ph)PTSQR       | NEK6                  | 1.0                       | 0.32349        |              | Yes                     |
| 326 | IPI00620256 | Lamin-A/C;Lamin-A/C;L              | Lmna;Lmn1;Lmna;Lmn1      | S395  | 2           | 9             | LRLSPSPTSQR        | LRLS(0.055)PS(0.055)PT  | LRLSPS(ph)S(ph)QR     | CK1                   | 1.2                       | 0.31608        |              | Yes                     |
| 299 | IPI00620256 | Lamin-A/C;Lamin-A/C;L              | Lmna;Lmn1;Lmna;Lmn1      | S458  | 1           | 3             | NKSNEQDSMGNWQIR    | NKS(1)NEDQSMGNWQ        | NKS(ph)NEDQSM(ox)G    | PKA/AKT               | 1.0                       | 0.2998         |              | Yes                     |
| 243 | IPI00620256 | Lamin-A/C;Lamin-A/C;L              | Lmna;Lmn1;Lmna;Lmn1      | S546  | 1           | 1             | SLTMVEDNEDDEDGEE   | S(0.57)LT(0.43)MVEDN    | S(ph)LTMVEDNEDDED     | NEK6                  | 1.0                       | 0.2296         |              | No                      |

| No  | IPI Numbers | Protein Names            | Gene Names              | pAA   | Number of P | Position in p | Peptide Sequence    | Phospho (STY) Probabil | Modified Sequence     | Best Motifs        | Ratio <sup>1</sup> of Phd | Ratio Signific | Up-/Down-reg | Phosphosites localized? |
|-----|-------------|--------------------------|-------------------------|-------|-------------|---------------|---------------------|------------------------|-----------------------|--------------------|---------------------------|----------------|--------------|-------------------------|
| 325 | IPI00620256 | Lamin-A/C;Lamin-A/C/L    | Lmna;Lmn1;Lmna;Lmn1     | T394  | 2           | 8             | LRLSPSPTSQR         | LRLS(0.055)PS(0.055)PT | LRLSPSPT(ph)S(ph)QR   |                    | 1.2                       | 0.31608        |              | Yes                     |
| 128 | IPI00659447 | LIM domain only 7        | Lmo7                    | S194  | 1           | 4             | REDSFESLDSLGSR      | REDS(0.939)FES(0.02)LS | REDS(ph)FESLDSLGSR    | PLK1               | 0.9                       | 0.10641        |              | Yes                     |
| 209 | IPI00474873 | Leucine-rich repeat-cor  | Lrrc16a;Carmil;Lrrc16;L | S971  | 1           | 1             | SSGLISELPSSEGR      | S(0.554)S(0.393)GLIS(O | S(ph)SSGLISELPSSEGR   |                    | 0.9                       | 0.19852        |              | No                      |
| 171 | IPI00474873 | Leucine-rich repeat-cor  | Lrrc16a;Carmil;Lrrc16;L | S972  | 1           | 3             | RSSGLISELPSSEGR     | RS(0.107)S(0.893)GLISE | RSS(ph)GLISELPSSEGR   | PKA                | 1.3                       | 0.15603        |              | Yes                     |
| 137 | IPI00762483 | Putative uncharacterize  | Lrrfp1;Lrrfp1;Lrrfp1;F  | S98   | 1           | 3             | RGSGDTSISMDEEASR    | RGS(0.989)GDT(0.009)S  | RGS(ph)GSDTSISM(ox)D  | PKA                | 0.9                       | 0.11626        |              | Yes                     |
| 193 | IPI00607974 | Protein MAK16 homolo     | Mak16;Rbm13             | S197  | 2           | 9             | ALEKQEAESDEDEE      | ALEKQEAES(1)DS(1)EDE   | ALEKQEAES(ph)DS(ph)E  | CK2                | 1.3                       | 0.17634        |              | Yes                     |
| 194 | IPI00607974 | Protein MAK16 homolo     | Mak16;Rbm13             | S199  | 2           | 11            | ALEKQEAESDEDEE      | ALEKQEAES(1)DS(1)EDE   | ALEKQEAES(ph)DS(ph)E  | CK2                | 1.3                       | 0.17634        |              | Yes                     |
| 425 | IPI00676243 | Microtubule-associated   | Map1a;Mtap1;Mtap1a;     | S764  | 2           | 5             | ELALSSPEDLTQDFEELKR | ELALS(1)S(1)PEDLTQDF   | ELALS(ph)S(ph)PEDLTQ  | CK2                | 1.0                       | 0.39651        |              | Yes                     |
| 426 | IPI00676243 | Microtubule-associated   | Map1a;Mtap1;Mtap1a;     | S765  | 2           | 6             | ELALSSPEDLTQDFEELKR | ELALS(1)S(1)PEDLTQDF   | ELALS(ph)S(ph)PEDLTQ  | Polo box           | 1.0                       | 0.39651        |              | Yes                     |
| 406 | IPI00223621 | Microtubule-associated   | Map1s;Bpy2ip1;Map8;f    | S658  | 1           | 1             | STSPHDVLDLVSPEFSH   | S(0.778)T(0.111)S(0.11 | S(ph)STSPHDVLDLVSPE   | PKA                | 1.1                       | 0.38036        |              | Yes                     |
| 531 | IPI00123967 | Putative uncharacterize  | Map3k7;Map3k7;Tak1;     | S439  | 1           | 3             | RRSIQDLTVGTGTEPGQVS | RRS(1)QDLTVGTGTEPGG    | RRS(ph)QDLTVGTGTEPG   | AURORA-A           | 1.1                       | 0.48457        |              | Yes                     |
| 296 | IPI00408119 | Microtubule-associated   | Map4;Mtap4;Map4;Mt      | S598  | 1           | 11            | GQSTVPPCTASPEPVK    | GQSTVPPCT(0.001)AS(D   | GQSTVPPCTAS(ph)PEPVK  |                    | 1.0                       | 0.29258        |              | Yes                     |
| 411 | IPI00408119 | Microtubule-associated   | Map4;Mtap4;Map4;Mt      | S667  | 1           | 21            | AAVGVGTGNDIITPPNKE  | AAVGVGTGNDIITPPNKE     | AAVGVGTGNDIITPPNKE    | WW GroupIV         | 1.0                       | 0.38366        |              | Yes                     |
| 457 | IPI00408119 | Microtubule-associated   | Map4;Mtap4;Map4;Mt      | T788  | 1           | 6             | ATSPSTLVSTGSSSR     | AT(0.06)S(0.06)PS(0.06 | ATSPST(ph)LVSTGSSSR   | CK1                | 1.1                       | 0.42246        |              | Yes                     |
| 8   | IPI00119663 | Mitogen-activated prot   | Mapk1;Erk2;Mapk;Prkn    | T179  | 2           | 9             | VADPDHDHTGFLTEYVA   | VADPDHDHT(0.6)GFLT     | VADPDHDHT(ph)GFLTE    | FHA2 Rad53p        | 5.3                       | 1.50E-23       | Up           | No                      |
| 3   | IPI00119663 | Mitogen-activated prot   | Mapk1;Erk2;Mapk;Prkn    | T183  | 2           | 13            | VADPDHDHTGFLTEYVA   | VADPDHDHTGFLT(1)EY     | VADPDHDHTGFLT(ph)EY   | (ph)VATR           | 10.9                      | 3.47E-47       | Up           | Yes                     |
| 4   | IPI00119663 | Mitogen-activated prot   | Mapk1;Erk2;Mapk;Prkn    | T188  | 2           | 18            | VADPDHDHTGFLTEYVA   | VADPDHDHT(0.177)GFL    | VADPDHDHTGFLT(ph)EY   | (ph)VATR           | 9.5                       | 1.003E-41      | Up           | No                      |
| 20  | IPI00119663 | Mitogen-activated prot   | Mapk1;Erk2;Mapk;Prkn    | Y185  | 1           | 15            | VADPDHDHTGFLTEYVA   | VADPDHDHTGFLT(0.00     | VADPDHDHTGFLTEY(ph)   | VATR               | 2.4                       | 2.44E-07       | Up           | Yes                     |
| 6   | IPI00230277 | Mitogen-activated prot   | Mapk3;Erk1;Prkm3;Ma     | T199  | 2           | 9             | IADPEHDHTGFLTEYVAT  | IADPEHDHT(0.992)GFL    | IADPEHDHT(ph)GFLT     | (ph)FHA2 Rad53p    | 6.7                       | 3.98E-30       | Up           | Yes                     |
| 9   | IPI00230277 | Mitogen-activated prot   | Mapk3;Erk1;Prkm3;Ma     | T208  | 2           | 18            | IADPEHDHTGFLTEYVAT  | IADPEHDHT(0.156)GFL    | IADPEHDHTGFLT(ph)EY   | VAT(ph)R           | 4.8                       | 7.763E-21      | Up           | Yes                     |
| 12  | IPI00230277 | Mitogen-activated prot   | Mapk3;Erk1;Prkm3;Ma     | Y205  | 1           | 15            | IADPEHDHTGFLTEYVAT  | IADPEHDHTGFLT(0.012    | IADPEHDHTGFLTEY(ph)   | VATR               | 3.5                       | 1.164E-13      | Up           | Yes                     |
| 648 | IPI00229534 | Myristoylated alanine-r  | Marcks;Macs             | S138  | 1           | 8             | AEDGAAPSPSSETPKKK   | AEDGAAPS(0.25)PS(0.2   | AEDGAAPS(ph)PSSETPKK  |                    |                           |                |              | No                      |
| 649 | IPI00229534 | Myristoylated alanine-r  | Marcks;Macs             | S141  | 1           | 11            | AEDGAAPSPSSETPKKK   | AEDGAAPS(0.004)PS(O    | AEDGAAPSPS(ph)ETPK    | CK1                |                           |                |              | No                      |
| 493 | IPI00622008 | Microtubule-associated   | Mast2;Mast205;Mast2     | S149  | 1           | 7             | NQSLGQSPSLTAGLK     | NQSLGQS(0.99)APS(0.0   | NQSLGQS(ph)APSLTAGI   | NEK6               | 1.1                       | 0.45868        |              | Yes                     |
| 48  | IPI00677823 | Microtubule-associated   | Mast4;Mast4             | S204  | 1           | 7             | SQALGQSPSLTAGLK     | SQALGQS(0.823)APS(O    | SQALGQS(ph)APSLTAGI   | NEK6               | 0.7                       | 0.015541       | Down         | Yes                     |
| 33  | IPI00453826 | Matrin-3                 | Matr3                   | S188  | 1           | 3             | RDSFDDRGPSPSLNPLV   | RDS(0.826)FDDRGRS(0.   | RDS(ph)FDDRGPSPSLNP   | PKA                | 1.7                       | 0.003376       | Up           | Yes                     |
| 650 | IPI00453826 | Matrin-3                 | Matr3                   | S195  | 1           | 10            | RDSFDDRGPSPSLNPLV   | RDS(0.5)FDDRGRS(0.5)   | RDS(ph)FDDRGPSPSLNP   | CAMK2              |                           |                |              | No                      |
| 68  | IPI00117098 | MAP3K12-binding inhib    | Mbip                    | S22   | 1           | 7             | SLEQCSSPLLTR        | SLEQCS(0.002)S(0.998)  | SLEQCSS(ph)PLLTR      | Polo box           | 0.8                       | 0.036854       | Down         | Yes                     |
| 41  | IPI00323820 | DNA replication licensi  | Mcm2;Bm28;Cdc1;Kiaa     | S21   | 1           | 3             | RISDPLTSSPGR        | RIS(0.997)DPLT(0.002)S | RIS(ph)DPLTSSPGR      | PKA                | 0.7                       | 0.012453       | Down         | Yes                     |
| 412 | IPI00323820 | DNA replication licensi  | Mcm2;Bm28;Cdc1;Kiaa     | S27   | 1           | 8             | ISDPLTSSPGR         | ISDPLTS(0.002)S(0.998) | ISDPLTS(ph)PGR        | Polo box           | 1.0                       | 0.384          |              | Yes                     |
| 138 | IPI00753701 | Mediator of DNA dama     | Mdc1;Kiaa0170           | S168  | 1           | 17            | VLLAADSEEEGDFPSPG   | VLLAADS(1)EEEGDFPSP    | VLLAADS(ph)EEEGDFPS   | CK2                | 0.9                       | 0.11676        |              | Yes                     |
| 123 | IPI00857417 | Mediator of RNA polym    | Med24;D11Erdt307e;T     | S890  | 1           | 14            | LLSSDDDDANILSSPTDR  | LLSSDDDDANILS(0.039)   | LLSSDDDDANILSS(ph)P   | T                  | 0.9                       | 0.098768       |              | Yes                     |
| 204 | IPI00850543 | Mitochondrial fission fa | Mff;Mff                 | S146  | 1           | 3             | NDSIPVLR            | NDS(1)IPVLR            | NDS(ph)IPVLR          | CHK1/2             | 0.9                       | 0.19261        |              | Yes                     |
| 416 | IPI00116372 | Myeloid leukemia facto   | Mlf2                    | S237  | 1           | 9             | LAIQGPEDSPSR        | LAIQGPEDS(0.94)PS(O    | LAIQGPEDS(ph)PSR      | CDK2               | 1.0                       | 0.38884        |              | Yes                     |
| 149 | IPI00856176 | Putative uncharacterize  | Mobk1a;Mobk1a;Mob       | T35   | 1           | 5             | HAEAT1JLGSNLR       | HAEAT(1)JLGSNLR        | HAEAT(ph)JLGSNLR      | PLK1               | 0.9                       | 0.12741        |              | Yes                     |
| 173 | IPI00720036 | Myosin phosphatase Rf    | Mrip;Kiaa0864;Mrip;R    | S1018 | 1           | 1             | SKSVIEQVSWDN        | S(0.999)KS(0.001)VIEQ  | S(ph)KSVIEQVSWDN      |                    | 1.3                       | 0.15621        |              | Yes                     |
| 480 | IPI00720036 | Myosin phosphatase Rf    | Mrip;Kiaa0864;Mrip;R    | S1020 | 1           | 3             | SKSVIEQVSWDN        | S(0.096)KS(0.904)VIEQ  | SKS(ph)VIEQVSWDN      | CAMK2              | 1.1                       | 0.4469         |              | Yes                     |
| 56  | IPI00720036 | Myosin phosphatase Rf    | Mrip;Kiaa0864;Mrip;R    | S292  | 1           | 13            | AEEQLPPLSPSPSPH     | AEEQLPPLS(0.019)PPS    | AEEQLPPLSPSPS(ph)P    | WW GroupIV         | 0.8                       | 0.023892       | Down         | Yes                     |
| 651 | IPI00720036 | Myosin phosphatase Rf    | Mrip;Kiaa0864;Mrip;R    | S294  | 1           | 15            | AEEQLPPLSPSPSPH     | AEEQLPPLS(0.001)PPS    | AEEQLPPLSPSPS(ph)T    | GSK3               |                           |                |              | No                      |
| 652 | IPI00720036 | Myosin phosphatase Rf    | Mrip;Kiaa0864;Mrip;R    | T295  | 1           | 16            | AEEQLPPLSPSPSPH     | AEEQLPPLS(0.001)PPS    | AEEQLPPLSPSPS(ph)T    | WW GroupIV         |                           |                |              | No                      |
| 81  | IPI00128196 | Myotubularin-related p   | Mtmr2;Mtmr2;RP23-13     | S74   | 1           | 3             | SSCESLGAQLPAAR      | S(0.171)S(0.075)S(0.75 | SSS(ph)CESLGAQLPAAR   | CHK1               | 0.8                       | 0.052329       |              | Yes                     |
| 653 | IPI00132938 | Myeloid-associated diff  | Myadm;Mug               | S16   | 4           | 9             | TTTTTTSSSTTVGSSAR   | T(0.509)T(0.449)T(0.53 | T(ph)TTTTSSSTTVGSSA   | CK1                |                           |                |              | Yes                     |
| 39  | IPI00132938 | Myeloid-associated diff  | Myadm;Mug               | S17   | 1           | 10            | TTTTTTSSSTTVGSSAR   | T(0.001)T(0.001)T(0.00 | TTTTTTSSS(ph)TVGSA    | CK1                | 0.7                       | 0.010051       | Down         | No                      |
| 528 | IPI00331361 | Myb-binding protein 1A   | Mybbp1a;P160;Mybbp      | S1253 | 1           | 10            | SPAPSNPTLSPSTPAK    | SPAPSNPT(0.041)LS(O    | SPAPSNPTLSPSTPAK      |                    | 1.1                       | 0.48276        |              | Yes                     |
| 535 | IPI00757312 | Myosin, heavy polypep    | Myh10;RP23-396M19.2     | S1993 | 1           | 13            | RQLHIEGASLELSDDDTE  | RQLHIEGASLELS(0.993)   | RQLHIEGASLELS(ph)DD   | NEK6               | 1.1                       | 0.48999        |              | Yes                     |
| 442 | IPI00757312 | Myosin, heavy polypep    | Myh10;RP23-396M19.2     | T1997 | 1           | 17            | RQLHIEGASLELSDDDTE  | RQLHIEGASLELS(0.036)   | RQLHIEGASLELSDDDT     | (ph)ESK            | 1.0                       | 0.41008        |              | Yes                     |
| 212 | IPI00752027 | Acyl-CoA synthetase sh   | Myh7b;Acss2;RP23-26D    | S30   | 1           | 3             | GWSPPEVVR           | GWS(1)PPEVVR           | GWS(ph)PPEVVR         | PKA/AKT            | 0.9                       | 0.20299        |              | Yes                     |
| 351 | IPI00123181 | Myosin-9;Myosin heav     | Myh9                    | S1943 | 1           | 7             | KGTGDCSDEEVDGKADG   | KGT(0.003)GDCS(0.997   | KGTGDCS(ph)DEEVDGK    | CK2                | 1.2                       | 0.34123        |              | Yes                     |
| 70  | IPI00123181 | Myosin-9;Myosin heav     | Myh9                    | T1939 | 1           | 3             | KGTGDCSDEEVDGKADG   | KGT(0.5)GDCS(0.5)DEE   | KGT(ph)GDCSDEEVDGK    | PKA                | 1.4                       | 0.040104       | Up           | No                      |
| 295 | IPI00849670 | Myof protein;Myoferlin   | Myof;Myof;Fer13;Kiaa    | S175  | 1           | 17            | GPSGTVSEALQR        | GPSGT(0.003)VS(0.997)  | GPSGTVSEALQR          | CK1                | 1.0                       | 0.29216        |              | Yes                     |
| 447 | IPI00133977 | Nap14 protein;Nucleos    | Nap14;mCG_129001;N      | S125  | 1           | 8             | EFITGDVEPTDAESAWHS  | EFITGDVEPTDAESAWHS     | EFITGDVEPTDAESAWHS    | CK2                | 1.0                       | 0.41272        |              | Yes                     |
| 28  | IPI00133977 | Nap14 protein;Nucleos    | Nap14;mCG_129001;N      | T117  | 1           | 10            | EFITGDVEPTDAESAWHS  | EFIT(0.05)GDVEPT(0.51  | EFITGDVEPT(ph)DAESA   | CK2                | 0.6                       | 0.000647       | Down         | No                      |
| 290 | IPI00317794 | Nucleolin;Protein C23    | Ncl;Nuc                 | S145  | 2           | 7             | NAKKEDSDEDEDEEDED   | NAKKEDS(1)DEDEDEED     | NAKKEDS(ph)DEDEDEE    | EDDS(ph)DEDEDEEDED | 1.2                       | 0.28729        |              | Yes                     |
| 291 | IPI00317794 | Nucleolin;Protein C23    | Ncl;Nuc                 | S157  | 2           | 19            | NAKKEDSDEDEDEEDED   | NAKKEDS(1)DEDEDEED     | NAKKEDS(ph)DEDEDEE    | EDDS(ph)DEDEDEEDED | 1.2                       | 0.28729        |              | Yes                     |
| 436 | IPI00116968 | Nuclear receptor coact   | Ncoa2;Grip1;Tif2;Ncoa   | S699  | 1           | 7             | LLQDSSPVDLAK        | LLQDSS(0.052)S(0.948)  | LLQDSS(ph)PVDLAK      | Polo box           | 1.1                       | 0.40325        |              | Yes                     |
| 187 | IPI00113730 | Nuclear receptor coact   | Ncoa2;RP23-120P1.1-0    | S846  | 1           | 3             | AVSLDSPVSVSGSPVVK   | AVS(0.999)LDS(0.001)P  | AVS(ph)LDSPVSVSGSPV   | CAMK2              | 0.9                       | 0.16935        |              | Yes                     |
| 87  | IPI00123871 | Nuclear receptor corep   | Ncor2;Smrt;Ncor2;Smrt   | S1255 | 1           | 6             | IVGEDSPSRLDR        | IVGEDS(0.5)PS(0.5)R    | IVGEDS(ph)PSRLDR      | CDK2               | 1.4                       | 0.058043       |              | No                      |
| 188 | IPI00123871 | Nuclear receptor corep   | Ncor2;Smrt;Ncor2;Smrt   | S1257 | 1           | 8             | IVGEDSPSRLDR        | IVGEDS(0.5)PS(0.5)R    | IVGEDS(ph)PSRLDR      |                    | 1.4                       | 0.058043       |              | No                      |
| 89  | IPI00125960 | Protein NDRG1;N-myc c    | Ndr1;Ndr1;Ndr1;Tdd5     | S333  | 1           | 6             | TASGSSVTSLEGR       | T(0.001)AS(0.003)GS(O  | TASGSS(ph)VTSLEGR     | CK1                | 1.3                       | 0.17265        |              | No                      |
| 443 | IPI00462445 | E3 ubiquitin-protein lig | Nedd4;Kiaa0093;Nedd     | S281  | 1           | 3             | RPSDDDLTDEDNDMD     | RPS(0.5)PDDDLT(0.5)D   | RPS(ph)PDDDLTDEDND    | PKA                | 1.1                       | 0.4111         |              | No                      |
| 76  | IPI00462445 | E3 ubiquitin-protein lig | Nedd4;Kiaa0093;Nedd     | S309  | 1           | 4             | RQISEEDVDGPDNR      | RQIS(1)EDVDGPDNR       | RQIS(ph)EDVDGPDNR     | CAMK2              | 1.0                       | 0.04888        | Down         | Yes                     |
| 308 | IPI00462445 | E3 ubiquitin-protein lig | Nedd4;Kiaa0093;Nedd     | T287  | 1           | 13            | TQWKRSPDDDLTDEDN    | T(0.001)QWKRSPDDDLT    | T(ph)QWKRSPDDDLT      | (ph)FHA1 Rad53p    | 0.8                       | 0.30577        |              | Yes                     |
| 654 | IPI00554928 | Neurofilament light pol  | Nefl;Nf68;Nfl           | S11   | 4           | 11            | MSSFYDYPFSTYKRR     | MSSFYDYPFYS(1)T(1)S    | MSSFYDYPFYS(ph)T(ph)S | (ph)Y(ph)KRR       |                           |                |              | Yes                     |
| 656 | IPI00554928 | Neurofilament light pol  | Nefl;Nf68;Nfl           | S13   | 4           | 13            | MSSFYDYPFSTYKRR     | MSSFYDYPFYS(1)T(1)S    | MSSFYDYPFYS(ph)T(ph)S | (ph)Y(ph)KRR       |                           |                |              | Yes                     |
| 655 | IPI00554928 | Neurofilament light pol  | Nefl;Nf68;Nfl           | T12   | 4           | 12            | MSSFYDYPFSTYKRR     | MSSFYDYPFYS(1)T(1)S    | MSSFYDYPFYS(ph)T(ph)S | (ph)Y(ph)KRR       |                           |                |              | Yes                     |

| No  | IPI Numbers | Protein Names             | Gene Names              | pAA   | Number of P | Position in p | Peptide Sequence    | Phospho (STY) Probabil  | Modified Sequence         | Best Motifs              | Ratio <sup>1</sup> of Phd | Ratio Signific | Up-/Down-reg | Phosphosites localized? |
|-----|-------------|---------------------------|-------------------------|-------|-------------|---------------|---------------------|-------------------------|---------------------------|--------------------------|---------------------------|----------------|--------------|-------------------------|
| 657 | IPI0054928  | Neurofilament light pol   | Nefl;Nf68;Nfl           | Y14   | 4           | 14            | MSSFGYDPYFSTYKRR    | MSSFGYDPYF(1)T(1)S(     | MSSFGYDPYF(ph)T(ph)S      | S(ph)Y(ph)KRR            |                           |                |              | Yes                     |
| 658 | IPI00409935 | Nuclear factor of activa  | Nfat4;Nfat3;Nfatc4;NF   | S334  | 1           | 3             | RTSSEQAVALPR        | RT(0.057)S(0.887)S(0.0  | RTS(ph)SEQAVALPR          | PKA                      |                           |                |              | Yes                     |
| 449 | IPI00421052 | Nipped-B-like protein;D   | Nipbl;Nipbl             | S2652 | 1           | 10            | AITSLGGGSPK         | AITSLGGG(S1)PK          | AITSLGGG(ph)PK            | CDK1                     | 1.1                       | 0.41415        |              | Yes                     |
| 659 | IPI00421052 | Nipped-B-like protein;D   | Nipbl;Nipbl;Nipbl       | S305  | 1           | 16            | GSRPPLILQSQSLPCSSPR | GS(0.004)RPPILQSQ(0.0   | GSRPPLILQSQSLPCSS(ph)     | NEK6                     |                           |                |              | No                      |
| 475 | IPI00421052 | Nipped-B-like protein;D   | Nipbl;Nipbl;Nipbl       | S306  | 1           | 17            | GSRPPLILQSQSLPCSSPR | GS(0.001)RPPILQSQ(0.0   | GSRPPLILQSQSLPCSS(ph)     | Polo box                 | 1.1                       | 0.44318        |              | Yes                     |
| 404 | IPI00318048 | Nucleolar protein 56;N    | Nop56;Nol5a;Nol5a;RP    | S536  | 1           | 9             | SSPKVEEVAEPEEAASPTT | SSPKVEEVA(S1)PEEAAS     | SSPKVEEVA(ph)PEEAAS       | CK2                      | 1.1                       | 0.37815        |              | Yes                     |
| 74  | IPI00318048 | Nucleolar protein 56;N    | Nop56;Nol5a;Nol5a;RP    | S543  | 1           | 16            | SSPKVEEVAEPEEAASPTT | SSPKVEEVAEPEEAAS(0.5    | SSPKVEEVAEPEEAAS(ph)PTTPK |                          | 0.8                       | 0.044601       | Down         | Yes                     |
| 231 | IPI00463468 | Nucleolar protein 58;N    | Nop58;Nol5              | S509  | 1           | 8             | HIKEEPLSEEEPCSTAVPR | HIKEEPLS(0.977)EEEPC    | HIKEEPLS(ph)EEEPCST       | CK2                      | 0.9                       | 0.22227        |              | Yes                     |
| 660 | IPI00463468 | Nucleolar protein 58;N    | Nop58;Nol5              | T515  | 1           | 14            | HIKEEPLSEEEPCSTAVPR | HIKEEPLS(0.175)EEEPC    | HIKEEPLSEEEPC(ph)ST       | FHA KAPP                 |                           |                |              | No                      |
| 661 | IPI00127415 | Nucleophosmin;Nucleo      | Npm1;Npm1;Npm1;Np       | S106  | 1           | 3             | CGSGPVHISGQHLVAVEH  | CGS(0.322)GPVHIS(0.32   | CGS(ph)GPVHISGQHLVAVE     | DAEAEDEDEEDVKLLGM(ox)SGK |                           |                |              | No                      |
| 85  | IPI00127415 | Nucleophosmin;Nucleo      | Npm1;Npm1;Npm1;Np       | S112  | 1           | 9             | CGSGPVHISGQHLVAVEH  | CGS(0.094)GPVHIS(0.81   | CGSGPVHIS(ph)GQHLVAVE     | DAEAEDEDEEDVKLL          | 1.4                       | 0.057059       |              | Yes                     |
| 155 | IPI00127415 | Nucleophosmin;Nucleo      | Npm1;Npm1;Npm1;Np       | S125  | 1           | 22            | CGSGPVHISGQHLVAVEH  | CGSGPVHISGQHLVAVEH      | CGSGPVHISGQHLVAVEH        | CK2                      | 1.3                       | 0.13318        |              | Yes                     |
| 305 | IPI00894870 | tRNA (cytosine-5'-)met    | Nsun2;D13Wsu123e;M      | S723  | 1           | 12            | EGVILTNENAASPEQPGI  | EGVILTNENAAS(1)PEQPG    | EGVILTNENAAS(ph)PEQPG     | DEDAK                    | 1.0                       | 0.30543        |              | Yes                     |
| 359 | IPI00132314 | Nucleobindin-1;CALNU      | Nucb1;Nuc;Nucb;Nucb     | S368  | 1           | 5             | AQRLSQETALGR        | AQRLS(1)QETALGR         | AQRLS(ph)QETALGR          | PKA                      | 1.2                       | 0.346202       |              | Yes                     |
| 154 | IPI00132314 | Nucleobindin-1;CALNU      | Nucb1;Nuc;Nucb;Nucb     | S456  | 1           | 14            | KVPEQPPELPQLDSQHL   | KVPEQPPELPQLDS(1)QH     | KVPEQPPELPQLDS(ph)QHL     |                          | 0.9                       | 0.13293        |              | Yes                     |
| 94  | IPI00132314 | Nucleobindin-1;CALNU      | Nucb1;Nuc;Nucb;Nucb     | T371  | 1           | 8             | AQRLSQETALGR        | AQRLS(0.198)QET(0.80    | AQRLSQET(ph)EALGR         | CK1                      | 0.8                       | 0.064681       |              | Yes                     |
| 663 | IPI00341869 | Nuclear ubiquitous case   | Nucks1;Nucks            | S14   | 1           | 5             | VVDYSQFQESDDADEDY   | VVDY(0.134)S(0.421)QF   | VVDYS(ph)QFQESDDADEDY     | GRDSSGPPAK               |                           |                |              | No                      |
| 548 | IPI00341869 | Nuclear ubiquitous case   | Nucks1;Nucks            | S19   | 1           | 11            | KVVDYSQFQESDDADEDY  | KVVDYSQFQES(1)DDAD      | KVVDYSQFQES(ph)DDADEDY    | GR                       | 1.1                       | 0.49233        |              | Yes                     |
| 527 | IPI00341869 | Nuclear ubiquitous case   | Nucks1;Nucks            | S30   | 1           | 21            | VVDYSQFQESDDADEDY   | VVDY(0.007)S(0.014)QF   | VVDYSQFQESDDADEDY         | PKA                      | 1.1                       | 0.48153        |              | No                      |
| 662 | IPI00341869 | Nuclear ubiquitous case   | Nucks1;Nucks            | Y13   | 1           | 5             | KVVDYSQFQESDDADEDY  | KVVDY(0.426)S(0.13)QF   | KVVDY(ph)SQFQESDDADEDY    | GRDSSGPPAK               |                           |                |              | No                      |
| 664 | IPI00341869 | Nuclear ubiquitous case   | Nucks1;Nucks            | Y26   | 1           | 17            | VVDYSQFQESDDADEDY   | VVDY(0.025)S(0.04)QF    | VVDYSQFQES(ph)DDAD        | SRC                      |                           |                |              | No                      |
| 342 | IPI00263048 | Putative uncharacterize   | Numa1                   | S1739 | 1           | 14            | TQPDGTSVPGEPASPIQ   | TQPDGTSVPGEPAS(0.99     | TQPDGTSVPGEPAS(ph)P       | WW GroupIV               | 1.2                       | 0.33401        |              | Yes                     |
| 240 | IPI00420602 | Nucleoporin NUP188 h      | Nup188;Kiaa0169         | S1719 | 1           | 5             | GAPSSPAAGVLPSPQK    | GAPS(0.012)S(0.988)PA   | GAPSS(ph)PAAGVLPSPC       | WW GroupIV               | 0.9                       | 0.2259         |              | Yes                     |
| 445 | IPI00918049 | Oxysterol-binding prote   | Osbp11                  | S192  | 1           | 10            | SFSLASSGNSPISQR     | SFSLASS(0.001)GNS(0.9   | SFSLASSGNS(ph)PISQR       | CK1                      | 1.0                       | 0.4115         |              | Yes                     |
| 170 | IPI00462728 | MKIAA0704 protein;Ox      | Osbp3;mkIAA0704;Ost     | S302  | 1           | 3             | LHSSNPMLSTLDFGEEK   | LHS(0.818)S(0.145)NPN   | LHS(ph)SNPMLSTLDFGE       | CAMK2                    | 0.9                       | 0.15547        |              | Yes                     |
| 297 | IPI00462728 | MKIAA0704 protein;Ox      | Osbp3;mkIAA0704;Ost     | S303  | 1           | 4             | LHSSNPMLSTLDFGEEK   | LHS(0.083)S(0.909)NPN   | LHSSNPMLSTLDFGE           | NEK6                     | 1.0                       | 0.2928         |              | Yes                     |
| 17  | IPI00911135 | Putative uncharacterize   | Oxr1;Oxr1;C7;Gm1238;    | S201  | 1           | 3             | VVSSSTEEEAFATEK     | VVS(0.927)S(0.001)T(0   | VVS(ph)STEEEAFATEK        | CAMK2                    | 2.5                       | 5.976E-08      | Up           | Yes                     |
| 518 | IPI00223738 | Serine/threonine-prote    | Oxsr1;Oxr1;Oxr1;mkIA    | S339  | 1           | 12            | LHKTEDEGGWEVSDDEF   | LHKTEDEGGWEV(S1)DD      | LHKTEDEGGWEV(ph)D         | CK2                      | 1.1                       | 0.47645        |              | Yes                     |
| 286 | IPI00129298 | Paralemmin;Paralemm       | Palm;Palm               | T145  | 1           | 14            | SETLVNAQQTPLGTPK    | SETLVNAQQTPLGT(1)PK     | SETLVNAQQTPLGT(ph)P       | CDK1                     | 1.0                       | 0.28403        |              | Yes                     |
| 253 | IPI00719927 | Protocadherin 1 isoform   | Pcdh1;Pcdh1;Pcdh1       | S823  | 1           | 14            | SNPLPISQLQPSPASISQ  | SNPLPISQLQP(S0.998)     | SNPLPISQLQP(S)P           | WW GroupIV               | 1.0                       | 0.24212        |              | Yes                     |
| 665 | IPI00464318 | PCF11;Pcf11 protein       | Pcf11;Pcf11             | S279  | 1           | 1             | SRAGPSLQMQDLK       | S(0.995)RAGPS(0.005)L   | S(ph)RAGPSLQMQDLK         | ox)QDLK                  |                           |                |              | Yes                     |
| 504 | IPI00828325 | Pericentriolar material   | Pcm1;Pcm1               | S1805 | 2           | 4             | NVRSDVSDQEEDEESER   | NVRS(1)DV(S1)DQEEDE     | NVRS(ph)DV(S)DQEEDE       | ESERCPVSINLSK            | 1.1                       | 0.46326        |              | Yes                     |
| 505 | IPI00828325 | Pericentriolar material   | Pcm1;Pcm1               | S1808 | 2           | 7             | NVRSDVSDQEEDEESER   | NVRS(1)DV(S1)DQEEDE     | NVRS(ph)DV(S)DQEE         | CK2                      | 1.1                       | 0.46326        |              | Yes                     |
| 260 | IPI00828325 | Pericentriolar material   | Pcm1;Pcm1               | S65   | 1           | 6             | VITNAISPESPGVGR     | VITNAIS(1)PESPGVGR      | VITNAIS(ph)PESPGVGR       | GSK3                     | 1.0                       | 0.25481        |              | Yes                     |
| 499 | IPI00352475 | 28 kDa heat- and acid-s   | Pdap1                   | S57   | 2           | 1             | SLDSEDESEDEDDYQQK   | S(0.983)LDS(0.017)DES   | S(ph)LDSDES(ph)EDED       | AURORA                   | 1.1                       | 0.46188        |              | Yes                     |
| 310 | IPI00352475 | 28 kDa heat- and acid-s   | Pdap1                   | S60   | 2           | 5             | KSLDSESEDEDDYQQK    | KS(0.036)LDS(0.982)DE   | KSLD(S)DES(ph)EDED        | CK1                      | 1.2                       | 0.30724        |              | Yes                     |
| 482 | IPI00352475 | 28 kDa heat- and acid-s   | Pdap1                   | S63   | 2           | 7             | SLDSESEDEDDYQQK     | S(0.983)LDS(0.017)DES   | S(ph)LDSDES(ph)EDED       | CK2                      | 1.1                       | 0.44855        |              | Yes                     |
| 463 | IPI00352475 | 28 kDa heat- and acid-s   | Pdap1                   | Y70   | 2           | 14            | SLDSESEDEDDYQQK     | S(0.034)LDS(0.966)DES   | SLD(S)DES(ph)EDED         | DDYQQK                   | 1.1                       | 0.42547        |              | No                      |
| 64  | IPI00130881 | cAMP-specific 3',5'-cyc   | Pde4a;Pde4a;Pde4a;Pd    | T331  | 1           | 4             | LVHTGSLNINVPR       | LVHT(0.911)GS(0.089)L   | LVHT(ph)GSLNINVPR         | NEK6                     | 0.8                       | 0.0312         | Down         | Yes                     |
| 73  | IPI00153375 | PDZ and LIM domain pr     | Pdlim2;Pdlim2           | S199  | 2           | 5             | VLLHSPGRPSSPR       | VLLHS(1)PGRPS(0.074)    | VLLHS(ph)PGRPSS(ph)P      | CDK2                     | 0.8                       | 0.041921       | Down         | Yes                     |
| 330 | IPI00153375 | PDZ and LIM domain pr     | Pdlim2;Pdlim2           | S204  | 1           | 10            | VLLHSPGRPSSPR       | VLLHS(0.161)PGRPS(0.6   | VLLHSPGRPS(ph)SPR         | PKA                      | 1.0                       | 0.31847        |              | No                      |
| 52  | IPI00153375 | PDZ and LIM domain pr     | Pdlim2;Pdlim2           | S205  | 2           | 11            | VLLHSPGRPSSPR       | VLLHS(1)PGRPS(0.074)    | VLLHS(ph)PGRPSS(ph)P      | PKC                      | 0.7                       | 0.017657       | Down         | Yes                     |
| 529 | IPI00317401 | Sister chromatid cohesi   | Pds5b;Aprin;As3;Kiaa0   | S1356 | 1           | 3             | AESPETSAVESTQSTPQK  | AES(1)PETSAVESTQSTP     | AES(ph)PETSAVESTQST       | CAMK2                    | 1.1                       | 0.48399        |              | Yes                     |
| 667 | IPI00317401 | Sister chromatid cohesi   | Pds5b;Aprin;As3;Kiaa0   | S1360 | 1           | 7             | AESPETSAVESTQSTPQK  | AES(0.333)PET(0.333)S   | AES(ph)PETSAVESTQST       | CK2                      |                           |                |              | No                      |
| 666 | IPI00317401 | Sister chromatid cohesi   | Pds5b;Aprin;As3;Kiaa0   | T1359 | 1           | 7             | AESPETSAVESTQSTPQK  | AES(0.492)PET(0.492)S   | AES(ph)PETSAVESTQST       | CK1                      |                           |                |              | No                      |
| 400 | IPI00856504 | Pyridoxal-dependent de    | Pdxdc1;Pdxdc1;Pdxdc1    | T687  | 1           | 6             | VQGTGVTTPPTPLGTR    | VQGTGVT(1)PPTPLGTR      | VQGTGVT(ph)PPTPLGTR       |                          | 1.0                       | 0.3743         |              | Yes                     |
| 358 | IPI00554862 | 6-phosphofructokinase     | Pfk1;Pfk-1;Pfk1;Pfk1    | S775  | 1           | 3             | TLSIDKGF            | TLS(1)DKGF              | TLS(ph)DKGF               | CAMK2                    | 1.2                       | 0.34558        |              | Yes                     |
| 479 | IPI00319973 | Membrane-associated       | Pgrmc1;Pgrmc            | S181  | 1           | 9             | EGEETPVYSDDEEPEKDE  | EGEETP(0.001)JVY(0.07   | EGEETPVY(S)DDEEPEK        | CK2                      | 1.1                       | 0.44677        |              | Yes                     |
| 668 | IPI00319973 | Membrane-associated       | Pgrmc1;Pgrmc            | T178  | 1           | 6             | EGEETPVYSDDEEPEKDE  | EGEETP(0.325)JVY(0.32   | EGEETP(ph)YVSDDEEPEK      | PLK1                     |                           |                |              | No                      |
| 669 | IPI00319973 | Membrane-associated       | Pgrmc1;Pgrmc            | T190  | 1           | 18            | EGEETPVYSDDEEPEKDE  | EGEETP(0.105)JVY(0.20   | EGEETPVYSDDEEPEKDE        | (ph)AR                   |                           |                |              | No                      |
| 77  | IPI00319973 | Membrane-associated       | Pgrmc1;Pgrmc            | Y180  | 1           | 8             | EGEETPVYSDDEEPEKDE  | EGEETP(0.116)JVY(0.76   | EGEETPVY(ph)SDDEEPEKDE    | TAR                      | 1.4                       | 0.049488       | Up           | Yes                     |
| 328 | IPI00377615 | Phf3 protein              | Phf3                    | S377  | 1           | 12            | NTVDIVDKPENSQRNEL   | NT(0.001)JVYDVKPENS     | NTVDIVDKPENS(ph)PQ        | CDK2                     | 1.2                       | 0.31766        |              | Yes                     |
| 670 | IPI00400215 | Plectin-1;Plectin-6;Plect | Plec1;Plec1;Plec1;Plec1 | S4243 | 1           | 1             | SSSVGSSSSYPISAGPR   | S(0.359)S(0.294)S(0.29  | S(ph)SSVSSSSYPISAG        | PKA/AKT                  |                           |                |              | No                      |
| 40  | IPI00400215 | Plectin-1;Plectin-6;Plect | Plec1;Plec1;Plec1;Plec1 | S4245 | 1           | 3             | SSSVGSSSSYPISAGPR   | S(0.164)S(0.09)S(0.747  | SSS(ph)JVGSSSSYPISAG      | PKA/AKT                  | 1.6                       | 0.010563       | Up           | No                      |
| 177 | IPI00400215 | Plectin-1;Plectin-6;Plect | Plec1;Plec1;Plec1;Plec1 | S580  | 1           | 9             | ARNDESQSLSPATR      | ARNDES(0.08)QLS(0.91    | ARNDESQSLS(ph)PATR        | CK1                      | 0.9                       | 0.15866        |              | Yes                     |
| 473 | IPI00400215 | Plectin-1;Plectin-6;Plect | Plec1;Plec1;Plec1;Plec1 | T3889 | 1           | 4             | KQITVEELVR          | KQIT(1)VEELVR           | KQIT(ph)VEELVR            | PKD                      | 1.1                       | 0.44235        |              | Yes                     |
| 423 | IPI00229810 | MKIAA1686 protein;Ple     | Plekha5;mkIAA1686;Ple   | S1241 | 1           | 1             | SLSPSPDSSTAADPPTP   | S(0.571)LS(0.385)PS(0.0 | S(ph)LSPSPDSSTAADPP       | GSK3                     | 1.0                       | 0.39542        |              | No                      |
| 671 | IPI00403031 | Pleckstrin homology do    | Plekho2;Plekho2         | S393  | 1           | 1             | SSSLGDLRL           | S(0.421)S(0.29)S(0.29)L | S(ph)SSSLGDLRL            |                          |                           |                |              | No                      |
| 323 | IPI00403031 | Pleckstrin homology do    | Plekho2;Plekho2         | S395  | 1           | 3             | SSSLGDLRL           | S(0.01)S(0.005)S(0.985  | SSS(ph)JGDLRL             | CAMK2                    | 1.0                       | 0.31445        |              | No                      |
| 86  | IPI00223459 | Lipid phosphate phosph    | Ppap2a;Hpic53;Lp1;Pp    | S274  | 1           | 14            | KEEDPHHTLHETASSR    | KEEDPHHT(0.01)T(0.08)L  | KEEDPHHTLHETAS(ph)SR      |                          | 0.8                       | 0.057114       |              | Yes                     |
| 93  | IPI00671847 | Ppp1r12a protein;MCG      | Ppp1r12a;mCG_122391     | S445  | 1           | 4             | KTGSYGALAEISASK     | KT(0.044)GS(0.911)Y(0.  | KTGS(ph)YGALAEISASK       | PKD                      | 1.4                       | 0.064677       |              | Yes                     |
| 5   | IPI00671847 | Ppp1r12a protein;MCG      | Ppp1r12a;mCG_122391     | S507  | 1           | 3             | LASTSDIEEKENR       | LAS(0.912)T(0.079)S(0.  | LAS(ph)TSDIEEKENR         | CAMK2                    | 6.9                       | 5.622E-31      | Up           | Yes                     |
| 10  | IPI00671847 | Ppp1r12a protein;MCG      | Ppp1r12a;mCG_122391     | S509  | 1           | 6             | RLASTSDIEEK         | RLAS(0.057)T(0.057)S(0  | RLASTS(ph)DIEEK           | CK2                      | 4.0                       | 2.25E-16       | Up           | Yes                     |
| 57  | IPI00671847 | Ppp1r12a protein;MCG      | Ppp1r12a;mCG_122391     | S861  | 1           | 11            | STGVSFWTQDSDENEQE   | S(0.001)T(0.001)GVS(0.  | STGVSFWTQDSDENEQ          | (ph)DENEQ                | 1.5                       | 0.023908       | Up           | Yes                     |
| 165 | IPI00671847 | Ppp1r12a protein;MCG      | Ppp1r12a;mCG_122391     | S870  | 1           | 20            | STGVSFWTQDSDENEQE   | S(0.001)T(0.001)GVS(0.  | STGVSFWTQDSDENEQ          | PKA                      | 1.3                       | 0.1454         |              | No                      |
| 674 | IPI00671847 | Ppp1r12a protein;MCG      | Ppp1r12a;mCG_122391     | S876  | 1           | 26            | STGVSFWTQDSDENEQE   | S(0.002)T(0.002)GVS(0.  | STGVSFWTQDSDENEQ          | (ph)DEN                  | 1.0                       |                |              | No                      |

| No  | IPI Numbers | Protein Names            | Gene Names              | pAA   | Number of P | Position in p | Peptide Sequence    | Phospho (STY) Probabil   | Modified Sequence              | Best Motifs | Ratio <sup>1</sup> of Phd | Ratio Signific | Up-/Down-reg | Phosphosites localized? |
|-----|-------------|--------------------------|-------------------------|-------|-------------|---------------|---------------------|--------------------------|--------------------------------|-------------|---------------------------|----------------|--------------|-------------------------|
| 675 | IPI00671847 | PPP1r12a protein;MCG     | PPP1r12a;mCG_122391     | S877  | 1           | 27            | STGVSWFTQSDSENEEQ   | S(0.002)T(0.002)GVS(0.0) | STGVSWFTQDS(ph)DEN             | CK2         |                           |                |              | No                      |
| 673 | IPI00671847 | PPP1r12a protein;MCG     | PPP1r12a;mCG_122391     | T508  | 1           | 5             | RLASTSDIEEK         | RLAS(0.482)T(0.482)S(0)  | RLAS(ph)TSDIEEK                | NEK6        |                           |                |              | No                      |
| 672 | IPI00671847 | PPP1r12a protein;MCG     | PPP1r12a;mCG_122391     | Y446  | 1           | 5             | KTGSYGALAEISASK     | KT(0.096)GS(0.39)T(0.3)  | KTGS(ph)YALAEISASK             | ALK         |                           |                |              | No                      |
| 228 | IPI00671847 | PPP1r12a protein;MCG     | PPP1r12a;mCG_122391     | S693  | 1           | 1             | STQGVTLTDLQEAEK     | S(0.645)T(0.355)QGVTL    | S(ph)TQGVTLTDLQEAEK            | PKA         | 0.9                       | 0.22132        |              | No                      |
| 489 | IPI00671847 | PPP1r12a protein;MCG     | PPP1r12a;mCG_122391     | T694  | 1           | 3             | RSTQGVTLTDLQEAEK    | RS(0.032)T(0.968)QGVTL   | RST(ph)QGVTLTDLQEAEK           | PKA         | 1.1                       | 0.45385        |              | Yes                     |
| 503 | IPI00671847 | PPP1r12a protein;MCG     | PPP1r12a;mCG_122391     | T698  | 1           | 7             | RSTQGVTLTDLQEAEK    | RS(0.204)T(0.204)QGVTL   | RSTQGVTL(ph)TDLQEAEK           | FHA1 Rad53p | 1.1                       | 0.46312        |              | No                      |
| 495 | IPI00856140 | Putative uncharacterize  | PPP1r2                  | S122  | 2           | 6             | TREQESSGEEDNLSPEE   | TREQES(1)S(1)GEEEDND     | TREQES(ph)S(ph)GEEEDN          | CK2         | 1.1                       | 0.46065        |              | Yes                     |
| 496 | IPI00856140 | Putative uncharacterize  | PPP1r2                  | S123  | 2           | 7             | TREQESSGEEDNLSPEE   | TREQES(1)S(1)GEEEDND     | TREQES(ph)S(ph)GEEEDN          | CK2         | 1.1                       | 0.46065        |              | Yes                     |
| 21  | IPI00856140 | Putative uncharacterize  | PPP1r2                  | T117  | 2           | 1             | TREQESSGEEDNLSPEE   | T(0.933)REQES(0.494)S    | T(ph)REQES(ph)S(ph)GEEEDNLSPEE |             | 0.5                       | 2.386E-06      | Down         | Yes                     |
| 287 | IPI00380331 | Protein phosphatase 2A   | PPP2r5d;mCG_2696        | S81   | 1           | 3             | RQSSFPFNLNK         | RQS(0.5)S(0.5)FPFNLNK    | RQS(ph)SFPFNLNK                | PKA         | 1.0                       | 0.28627        |              | No                      |
| 280 | IPI00380331 | Protein phosphatase 2A   | PPP2r5d;mCG_2696        | S82   | 1           | 4             | RQSSFPFNLNK         | RQS(0.279)S(0.721)FPF    | RQSS(ph)SFPFNLNK               | CAMK2       | 1.0                       | 0.28019        |              | No                      |
| 83  | IPI00119575 | Putative uncharacterize  | Prkar1a;Prkar1a;Prkar1  | S212  | 1           | 9             | TDSREDEISPPPPNPVVK  | TDSREDEIS(1)PPPPNPV      | TDSREDEIS(ph)PPPPNPVVK         |             | 0.8                       | 0.055375       |              | Yes                     |
| 676 | IPI00119575 | Putative uncharacterize  | Prkar1a;Prkar1a;Prkar1  | T204  | 1           | 1             | TDSREDEISPPPPNPVVK  | T(0.49)DS(0.1)REDEIS(0   | T(ph)DSREDEISPPPPNPVVK         |             |                           |                |              | No                      |
| 597 | IPI00169788 | Protein kinase, cAMP de  | Prkar2a;mCG_16488;Pr    | S97   | 1           | 3             | RVSVCATFNPDDEEEDN   | RVS(1)VCATFNPDDEEEDN     | RVS(ph)VCATFNPDDEEEDN          | AURORA-A    | 1.2                       | 0.2406         |              | Yes                     |
| 117 | IPI00169788 | Protein kinase, cAMP de  | Prkar2a;mCG_16488;Pr    | T102  | 1           | 8             | RVSVCATFNPDDEEEDN   | RVS(0.5)VCAT(0.5)FNPD    | RVS(ph)VCATFNPDDEEEDN          | PKA         | 1.3                       | 0.093751       |              | No                      |
| 217 | IPI00224570 | cAMP-dependent prote     | Prkar2b                 | S112  | 1           | 3             | RASVCAEAYNPDEEEDN   | RAS(1)VCAEAYNPDEEEDN     | RAS(ph)VCAEAYNPDEEEDN          | AURORA-A    | 1.2                       | 0.20697        |              | Yes                     |
| 233 | IPI00126939 | Protein kinase C delta-1 | Prkcdpb;Srbc            | S165  | 2           | 29            | AFQKVPPELLGPEDLQVLG | AFQKVPPELLGPEDLQVLG      | AFQKVPPELLGPEDLQVLG            | CK2         | 1.2                       | 0.2239         |              | Yes                     |
| 234 | IPI00126939 | Protein kinase C delta-1 | Prkcdpb;Srbc            | S166  | 2           | 30            | AFQKVPPELLGPEDLQVLG | AFQKVPPELLGPEDLQVLG      | AFQKVPPELLGPEDLQVLG            | CK2         | 1.2                       | 0.2239         |              | Yes                     |
| 146 | IPI00895452 | Protein kinase D3;Serin  | Prkd3;Prkcn;Prkd3;Prk   | S44   | 1           | 5             | LSNGFSAPSLTNSR      | LS(0.007)NGS(0.982)FS    | LSNGS(ph)FAPSLTNSR             | CK1         | 0.4                       | 2.67E-08       | Down         | Yes                     |
| 339 | IPI00417140 | Protein arginine N-met   | Prmt3;Hrmt113;Prmt3;H   | S22   | 2           | 12            | GAELGPEPLELSDSGDDA  | GAELGPEPLELS(1)DS(1)     | GAELGPEPLELS(ph)DS(1)          | NEK6        | 1.0                       | 0.33149        |              | Yes                     |
| 340 | IPI00417140 | Protein arginine N-met   | Prmt3;Hrmt113;Prmt3;H   | S24   | 2           | 14            | GAELGPEPLELSDSGDDA  | GAELGPEPLELS(1)DS(1)     | GAELGPEPLELS(ph)DS(1)          | NEK6        | 1.0                       | 0.33149        |              | Yes                     |
| 360 | IPI00896672 | PRP4 pre-mRNA proces     | Prpf4b;mCG_22253;Prf    | S852  | 1           | 21            | LCDFGSAHVADNDITPY   | LCDFGSAHVADNDITPY        | LCDFGSAHVADNDITPY              | PKA         | 1.2                       | 0.34647        |              | Yes                     |
| 99  | IPI00896672 | PRP4 pre-mRNA proces     | Prpf4b;mCG_22253;Prf    | S94   | 1           | 12            | EVIEASDKGELSPAKR    | EVIEASDKGELS(1)PAKR      | EVIEASDKGELS(ph)PAKR           | CDK2        | 1.4                       | 0.073754       |              | Yes                     |
| 116 | IPI00896672 | PRP4 pre-mRNA proces     | Prpf4b;mCG_22253;Prf    | Y849  | 1           | 18            | LCDFGSAHVADNDITPY   | LCDFGSAHVADNDITPY        | LCDFGSAHVADNDITPY              | PKA         | 1.3                       | 0.092502       |              | Yes                     |
| 355 | IPI00337948 | Tyrosine-protein phosph  | Ptpn12;Ptpn12;mCG_61    | S434  | 1           | 3             | NLSFEIK             | NLS(1)FEIK               | NLS(ph)FEIK                    | CHK1/2      | 1.0                       | 0.34495        |              | Yes                     |
| 452 | IPI00117689 | Polymerase I and trans   | Ptrf;Ptrf;Ptrf          | S42   | 1           | 10            | ATEEPSGTGSDELK      | ATEEPS(0.007)GT(0.076)   | ATEEPSGTGS(ph)DELK             | CK1         | 1.0                       | 0.42006        |              | Yes                     |
| 343 | IPI00112203 | Pumilio homolog 2;Put    | Pum2;Kiaa0235;Pum2;     | S136  | 1           | 4             | GKASPFEEQNR         | GKAS(1)PFEEQNR           | GKAS(ph)PFEEQNR                | CK2         | 1.0                       | 0.33505        |              | Yes                     |
| 677 | IPI00320422 | Periodic tryptophan pr   | Pwp1                    | S486  | 1           | 5             | GLSVSGPCGSRSPQQTPN  | GLS(0.072)VS(0.428)GP    | GLSVS(ph)GPCGSRSPQQTPN         | NEK6        |                           |                |              | No                      |
| 678 | IPI00320422 | Periodic tryptophan pr   | Pwp1                    | S491  | 1           | 10            | GLSVSGPCGSRSPQQTPN  | GLS(0.072)VS(0.428)GP    | GLSVS(ph)GPCGSRSPQQTPN         | PKA         |                           |                |              | No                      |
| 485 | IPI00320422 | Periodic tryptophan pr   | Pwp1                    | S493  | 1           | 12            | GLSVSGPCGSRSPQQTPN  | GLS(0.001)VS(0.001)GP    | GLSVSGPCGSRSPQQTPN             | PKA         | 1.1                       | 0.45002        |              | Yes                     |
| 265 | IPI00461460 | R3hdm1 protein           | R3hdm1                  | S381  | 1           | 3             | ASSFSGISVLR         | AS(0.06)S(0.936)FS(0.0)  | ASSF(ph)SFGISVLR               | PKD         | 1.0                       | 0.25977        |              | Yes                     |
| 679 | IPI00461479 | RAB3A-interacting prot   | Rab3ip                  | S215  | 1           | 7             | TLVLSSTPSTQPELAAA   | T(0.001)LVLS(0.044)S(0)  | TLVLS(ph)SPTQPELAAA            | Polo box    |                           |                |              | No                      |
| 680 | IPI00461479 | RAB3A-interacting prot   | Rab3ip                  | T217  | 1           | 9             | TLVLSSTPSTQPELAAA   | TLVLS(0.001)S(0.006)S    | TLVLS(ph)SPTQPELAAA            | CK1         |                           |                |              | Yes                     |
| 118 | IPI00845537 | Rab GTPase-binding eff   | Rabep1;Rab5ep;Rab5ep    | S407  | 1           | 4             | RAQSTDSLGTSSSLQSK   | RAQS(0.892)T(0.104)DS    | RAQS(ph)TDSLGTSSSLQSK          | CHK1/2      | 0.9                       | 0.094146       |              | Yes                     |
| 58  | IPI00453820 | Ankyrin;Ankyrin reg      | Rai14;Kiaa1334;Norpeg   | S914  | 1           | 3             | RQSQQLDLQQLQVVK     | RQS(1)QQLDLQQLQVVK       | RQS(ph)QQLDLQQLQVVK            | PKA         | 1.5                       | 0.024355       | Up           | Yes                     |
| 530 | IPI00135190 | Ran-binding protein 3    | Ranbp3                  | S28   | 3           | 1             | SAGSSSPEAGEDSDHEDC  | S(0.832)AGS(0.19)S(0.1)  | S(ph)AGSSS(ph)PEAGEDC          | GSK3        | 1.1                       | 0.48406        |              | Yes                     |
| 181 | IPI00135190 | Ran-binding protein 3    | Ranbp3                  | S31   | 3           | 4             | SAGSSSPEAGEDSDHEDC  | S(0.187)AGS(0.604)S(0.   | SAGS(ph)S(ph)PEAGEDC           | CK1         | 0.9                       | 0.16504        |              | No                      |
| 182 | IPI00135190 | Ran-binding protein 3    | Ranbp3                  | S32   | 3           | 5             | SAGSSSPEAGEDSDHEDC  | S(0.187)AGS(0.604)S(0.   | SAGS(ph)S(ph)PEAGEDC           | CK2         | 0.9                       | 0.16504        |              | No                      |
| 224 | IPI00135190 | Ran-binding protein 3    | Ranbp3                  | S33   | 2           | 6             | SAGSSSPEAGEDSDHEDC  | S(0.004)AGS(0.02)S(0.1)  | SAGSSS(ph)PEAGEDC              | Polo box    | 0.9                       | 0.21611        |              | Yes                     |
| 225 | IPI00135190 | Ran-binding protein 3    | Ranbp3                  | S40   | 2           | 13            | SAGSSSPEAGEDSDHEDC  | S(0.004)AGS(0.02)S(0.1)  | SAGSSS(ph)PEAGEDC              | CK2         | 0.9                       | 0.21611        |              | Yes                     |
| 519 | IPI00116031 | RNA-binding protein 10   | Rbm10;Kiaa0122;Rbm1     | S723  | 1           | 8             | LASDDRSPPR          | LASDRPS(1)PPR            | LASDRPS(ph)PPR                 | CDK2        | 1.1                       | 0.47774        |              | Yes                     |
| 34  | IPI00170394 | Splicing factor 45;45 kD | Rbm17;Spf45             | S155  | 1           | 6             | RPPDPSDEDEYERER     | RPPDPS(1)DEDEYERER       | RPPDPS(ph)DEDEYERER            |             | 1.7                       | 0.0034046      | Up           | Yes                     |
| 221 | IPI00229472 | RNA-binding protein 28   | Rbm28                   | S231  | 2           | 8             | VEEQVEDSDDEEDDSSH   | VEEQVEDS(0.999)DDEE      | VEEQVEDS(ph)DDEEDD             | CK2         | 1.0                       | 0.31382        |              | Yes                     |
| 230 | IPI00229472 | RNA-binding protein 28   | Rbm28                   | S239  | 2           | 16            | VEEQVEDSDDEEDDSSH   | VEEQVEDS(0.999)DDEE      | VEEQVEDS(ph)DDEEDDSSH          | PKA         | 0.9                       | 0.22176        |              | Yes                     |
| 105 | IPI00229472 | RNA-binding protein 28   | Rbm28                   | S248  | 2           | 25            | VEEQVEDSDDEEDDSSH   | VEEQVEDS(0.12)DDEE       | VEEQVEDS(ph)DDEEDDSSH          | PKA         | 1.4                       | 0.081931       |              | Yes                     |
| 106 | IPI00229472 | RNA-binding protein 28   | Rbm28                   | T249  | 2           | 26            | VEEQVEDSDDEEDDSSH   | VEEQVEDS(0.12)DDEE       | VEEQVEDS(ph)DDEEDDSSH          | PK1         | 1.4                       | 0.081931       |              | Yes                     |
| 241 | IPI00223371 | RNA-binding protein 39   | Rbm39;Caper;Rncp2;R     | S136  | 1           | 3             | DKSPVREPIDNLTPEER   | DKS(1)PVREPIDNLTPEER     | DKS(ph)PVREPIDNLTPEER          | CDK2        | 0.9                       | 0.22854        |              | Yes                     |
| 478 | IPI00380766 | E3 ubiquitin-protein lig | Rnf20;Bre1a;Kiaa4116;   | S138  | 1           | 13            | ALVVPPEPDSDSNQER    | ALVVPPEPDS(0.01)DS       | ALVVPPEPDS(ph)JNC              | CK2         | 1.1                       | 0.44644        |              | Yes                     |
| 264 | IPI00453849 | mRNA cap guanine-N7      | Rnmt;Kiaa0398;Rnmt;K    | S15   | 1           | 9             | ASVASDPESPPGGNEPA   | ASVASDPES(1)PPGGNE       | ASVASDPES(ph)PPGGNE            | ERK/MAPK    | 1.0                       | 0.25962        |              | Yes                     |
| 301 | IPI00111412 | 60S ribosomal protein    | Rpl4                    | S295  | 1           | 4             | ILKSPFQIR           | ILKS(1)PFQIR             | ILKS(ph)PFQIR                  |             | 1.0                       | 0.30236        |              | Yes                     |
| 391 | IPI00314950 | 60S acidic ribosomal pr  | Rplp0;Arbp              | S304  | 2           | 7             | AEAKEESEDEDMGFLFD   | AEAKES(1)EES(1)DEDM      | AEAKES(ph)EES(ph)DEDM          | GFLFD       | 1.1                       | 0.36662        |              | Yes                     |
| 396 | IPI00314950 | 60S acidic ribosomal pr  | Rplp0;Arbp              | S307  | 2           | 10            | AEAKEESEDEDMGFLFD   | AEAKES(1)EES(1)DEDM      | AEAKES(ph)EES(ph)DE            | CK1         | 1.1                       | 0.37076        |              | Yes                     |
| 125 | IPI00113377 | 60S acidic ribosomal pr  | Rplp1                   | S101  | 2           | 4             | KEESESEDEDMGFLFD    | KEES(1)EES(1)EDDMGF      | KEES(ph)EES(ph)EDDMGF          | GFLFD       | 1.3                       | 0.10222        |              | Yes                     |
| 126 | IPI00113377 | 60S acidic ribosomal pr  | Rplp1                   | S104  | 2           | 7             | KEESESEDEDMGFLFD    | KEES(1)EES(1)EDDMGF      | KEES(ph)EES(ph)EDDM            | CK1         | 1.3                       | 0.10222        |              | Yes                     |
| 283 | IPI00139795 | 60S acidic ribosomal pr  | Rplp2                   | S102  | 2           | 4             | KEESESEDEDMGFLFD    | KEES(1)EES(1)EDDMGF      | KEES(ph)EES(ph)EDDM            | GFLFD       | 1.2                       | 0.28092        |              | Yes                     |
| 284 | IPI00139795 | 60S acidic ribosomal pr  | Rplp2                   | S105  | 2           | 7             | KEESESEDEDMGFLFD    | KEES(1)EES(1)EDDMGF      | KEES(ph)EES(ph)EDDM            | CK1         | 1.2                       | 0.28092        |              | Yes                     |
| 469 | IPI00134599 | 40S ribosomal protein    | Rps3                    | T221  | 1           | 7             | DEILPTTPISEQK       | DEILPT(0.06)T(0.94)PIS   | DEILPTT(ph)PISEQK              | WW GroupIV  | 1.1                       | 0.43151        |              | Yes                     |
| 103 | IPI00114333 | Ribosomal protein S6 k   | Rps6ka3;Rps6ka-rs1;R    | S715  | 1           | 3             | NQSPVLEPVGR         | NQS(1)PVLEPVGR           | NQS(ph)PVLEPVGR                | CHK1/2      | 0.8                       | 0.078735       |              | Yes                     |
| 354 | IPI00849948 | 40S ribosomal protein    | Rps8;Rps8;OTTMUSG0      | T143  | 1           | 5             | GAKLTPEEEILNK       | GAKLT(1)PEEEILNK         | GAKLT(ph)PEEEILNK              | CK2         | 1.0                       | 0.34271        |              | Yes                     |
| 65  | IPI00411051 | Regulatory-associated    | Rptor;Raptor;Raptor;Rap | S863  | 1           | 14            | ILDTSSTLQSQAPASPTNK | ILDTSSTLQS(0.009)APAS    | ILDTSSTLQSQAPAS(ph)PTNK        | WW GroupIV  | 1.5                       | 0.031364       | Up           | Yes                     |
| 465 | IPI00468702 | Ras-related GTP-bindin   | Rragc;Rragc             | S94   | 1           | 11            | MSPNETLFLFSTNK      | MSPNETLFLS(0.997)T(1     | M(sp)SPNETLFLS(ph)TNK          |             | 1.1                       | 0.42644        |              | Yes                     |
| 446 | IPI00323822 | Ras-related protein R-R  | Rras2                   | S186  | 1           | 10            | KFQEQCECPSPPEPTRK   | KFQEQCECPSP(1)PEPTRK     | KFQEQCECPSP(ph)PEPTRK          | WW GroupIV  | 1.1                       | 0.41215        |              | Yes                     |
| 215 | IPI00420344 | RRP12-like protein       | Rrp12;Kiaa0690          | S1073 | 1           | 3             | GDSIEEILADSEDEDEEE  | GDS(0.5)IEEILADS(0.5)E   | GDS(ph)IEEILADSEDEDEE          | CK2         | 1.2                       | 0.20491        |              | No                      |
| 375 | IPI00420344 | RRP12-like protein       | Rrp12;Kiaa0690          | S1081 | 1           | 11            | GDSIEEILADSEDEDEEE  | GDSIEEILADS(1)EDEDEE     | GDSIEEILADS(ph)EDEDEE          | CK2         | 1.1                       | 0.35737        |              | Yes                     |
| 205 | IPI00471271 | Rsrc2 protein            | Rsrc2                   | S30   | 1           | 8             | KKEQSDISISPR        | KKEQS(0.003)DIS(0.884)   | KKEQSDIS(ph)ISPR               | PLK1        | 0.9                       | 0.1946         |              | Yes                     |
| 362 | IPI00471271 | Rsrc2 protein            | Rsrc2                   | S32   | 1           | 10            | KKEQSDISISPR        | KKEQS(0.307)S(0.695)     | KKEQSDIS(ph)ISPR               | CDK1        | 1.2                       | 0.3469         |              | No                      |



| No  | IPI Numbers | Protein Names              | Gene Names              | pAA   | Number of P | Position in p | Peptide Sequence     | Phospho (STY) Probabil  | Modified Sequence                    | Best Motifs | Ratio <sup>1</sup> of Phd | Ratio Signific | Up-/Down-reg | Phosphosites localized? |     |
|-----|-------------|----------------------------|-------------------------|-------|-------------|---------------|----------------------|-------------------------|--------------------------------------|-------------|---------------------------|----------------|--------------|-------------------------|-----|
| 681 | IPI00649426 | Runt-related transcript    | Runx1t1;RP23-134H12     | S590  | 1           | 1             | STTPGTPSTIETTPR      | S(0.445)T(0.277)T(0.27) | S(ph)TTPGTPSTIETTPR                  |             |                           |                |              | No                      |     |
| 682 | IPI00649426 | Runt-related transcript    | Runx1t1;RP23-134H12     | T601  | 3           | 12            | STTPGTPSTIETTPR      | S(0.443)T(0.403)T(0.17) | S(ph)TTPGTPSTIETTPR                  |             |                           |                |              | No                      |     |
| 683 | IPI00649426 | Runt-related transcript    | Runx1t1;RP23-134H12     | T602  | 3           | 13            | STTPGTPSTIETTPR      | S(0.443)T(0.403)T(0.17) | S(ph)TTPGTPSTIETTPR                  | CDK1        |                           |                |              | No                      |     |
| 395 | IPI00122174 | MKIAA0138 protein;Sc       | Safb2;mkIAA0138;Safb    | S404  | 1           | 7             | APTAALSPQDQSKEDVKA   | APTAALS(1)PEPQDQSKED    | APTAALS(ph)PEPQDQSKED                | CK1         | 1.1                       | 0.36992        |              | Yes                     |     |
| 431 | IPI00719971 | Serine/threonine-prote     | Saps3;D19ErtD703e;Kia   | S617  | 1           | 9             | IQQFDDGGSSDEEDIWEE   | IQQFDDGGSS(1)DEEDIWEE   | IQQFDDGGSS(ph)DEEDIWEE               | CK2         | 1.1                       | 0.39925        |              | Yes                     |     |
| 353 | IPI00338954 | SAM and SH3 domain-c       | Sash1                   | S400  | 1           | 3             | TCSFGGFDLTNR         | T(0.008)CS(0.392)FGGF   | TCS(ph)GGFDLTNR                      | CAMK2       | 1.0                       | 0.34363        |              | Yes                     |     |
| 684 | IPI00338954 | SAM and SH3 domain-c       | Sash1                   | S805  | 1           | 1             | SLPVSICR             | S(1)LPVSICR             | S(ph)LPVSICR                         | AURORA-A    |                           |                |              | Yes                     |     |
| 159 | IPI00177200 | Scavenger receptor clas    | Scarf2;Srec2            | S672  | 1           | 9             | HSAAAAAPSPPPAGR      | HSAAAAAPSP(1)PPAGR      | HSAAAAAPSP(ph)PPAGR                  |             | 0.9                       | 0.13631        |              | Yes                     |     |
| 335 | IPI00474285 | Protein LAP4;Protein sc    | Scrib;Kiaa0147;Lap4;Sc  | S1361 | 1           | 3             | RVSLVGADDLR          | RVS(1)LVGADDLR          | RVS(ph)LVGADDLR                      | AURORA-A    | 1.2                       | 0.32214        |              | Yes                     |     |
| 108 | IPI00135660 | Serum deprivation-resp     | Sdpr;Sdr                | S192  | 3           | 1             | SLEETHHNVDLSSDDELP   | S(0.545)LEET(0.543)LHN  | S(ph)LEET(ph)LHNVDLS                 | CK2         | 1.4                       | 0.084632       |              | No                      |     |
| 557 | IPI00135660 | Serum deprivation-resp     | Sdpr;Sdr                | S203  | 3           | 12            | SLEETHHNVDLSSDDELP   | S(0.025)LEET(0.024)LHN  | SLEETHHNVDLS(ph)S(ph)DDELPRDEEALEDSP | (ph)        | 1.1                       | 0.5            |              | Yes                     |     |
| 334 | IPI00135660 | Serum deprivation-resp     | Sdpr;Sdr                | S204  | 3           | 13            | SLEETHHNVDLSSDDELP   | S(0.025)LEET(0.024)LHN  | SLEETHHNVDLS(ph)S(ph)CK2             |             | 1.2                       | 0.31998        |              | Yes                     |     |
| 558 | IPI00135660 | Serum deprivation-resp     | Sdpr;Sdr                | S218  | 3           | 27            | SLEETHHNVDLSSDDELP   | S(0.255)LEET(0.225)LHN  | SLEETHHNVDLS(ph)S(ph)CK2             |             | 1.1                       | 0.5            |              | Yes                     |     |
| 685 | IPI00135660 | Serum deprivation-resp     | Sdpr;Sdr                | S283  | 2           | 2             | ASSGKSSPFKVSPLSFR    | AS(0.25)S(0.25)GKS(0.2) | AS(ph)GKSSPFKVS(ph)GSK3              |             |                           |                |              | No                      |     |
| 686 | IPI00135660 | Serum deprivation-resp     | Sdpr;Sdr                | S284  | 2           | 3             | ASSGKSSPFKVSPLSFR    | AS(0.046)S(0.318)GKS(0. | ASS(ph)GKSSPFKVS(ph)GSK3             |             |                           |                |              | No                      |     |
| 687 | IPI00135660 | Serum deprivation-resp     | Sdpr;Sdr                | S287  | 2           | 6             | ASSGKSSPFKVSPLSFR    | AS(0.009)S(0.061)GKS(0. | ASSGKSS(ph)SPFKVS(ph)CK1             |             |                           |                |              | No                      |     |
| 688 | IPI00135660 | Serum deprivation-resp     | Sdpr;Sdr                | S288  | 2           | 7             | ASSGKSSPFKVSPLSFR    | AS(0.009)S(0.061)GKS(0. | ASSGKSS(ph)SPFKVS(ph)Polo box        |             |                           |                |              | No                      |     |
| 201 | IPI00135660 | Serum deprivation-resp     | Sdpr;Sdr                | S293  | 2           | 12            | ASSGKSSPFKVSPLSFR    | AS(0.046)S(0.318)GKS(0. | ASS(ph)GKSSPFKVS(ph)PLSFR            |             |                           | 1.2            | 0.1881       |                         | Yes |
| 36  | IPI00135660 | Serum deprivation-resp     | Sdpr;Sdr                | S359  | 1           | 5             | RGNNSAVGNSADLTIEE    | RGNNNS(0.761)AVGNS(0.2  | RGNNNS(ph)AVGNSADLT                  | GSK3        | 1.6                       | 0.005584       | Up           | Yes                     |     |
| 160 | IPI00135660 | Serum deprivation-resp     | Sdpr;Sdr                | S363  | 1           | 9             | RGNNSAVGNSADLTIEE    | RGNNNS(0.021)AVGNS(0.9  | RGNNNSAVGNS(ph)NADLT                 | CK1         | 1.3                       | 0.13831        |              | Yes                     |     |
| 109 | IPI00135660 | Serum deprivation-resp     | Sdpr;Sdr                | T366  | 3           | 5             | SLEETHHNVDLSSDDELP   | S(0.545)LEET(0.543)LHN  | S(ph)LEET(ph)LHNVDLS                 | PLK1        | 1.4                       | 0.084632       |              | No                      |     |
| 79  | IPI00135660 | Serum deprivation-resp     | Sdpr;Sdr                | T368  | 1           | 14            | RGNNSAVGNSADLTIEE    | RGNNNSAVGNS(0.055)NAD   | RGNNNSAVGNSADLT(ph)PLK               |             | 1.4                       | 0.051611       |              | Yes                     |     |
| 458 | IPI00648142 | Sec23ip protein;SEC23-     | Sec23ip;Sec23ip         | S748  | 1           | 3             | KLSVGYAVYSVR         | KLS(1)VGYAVYSVR         | KLS(ph)VGYAVYSVR                     | CAMK2       | 1.1                       | 0.42292        |              | Yes                     |     |
| 438 | IPI00133030 | Protein transport prote    | Sec61b                  | S14   | 1           | 13            | PGPTPSGTNVGSSGRSP    | PGPTPSGTNVGSS(0.084)    | PGPTPSGTNVGSS(ph)GRSPSK              |             | 1.0                       | 0.40494        |              | Yes                     |     |
| 689 | IPI00133030 | Protein transport prote    | Sec61b                  | S17   | 1           | 16            | PGPTPSGTNVGSSGRSP    | PGPTPSGTNVGSS(0.057)    | PGPTPSGTNVGSS(ph)G                   | CDK2        |                           |                |              | No                      |     |
| 481 | IPI00114945 | Septin-2;Neural precurs    | Sept2;Nedd5;Nedd5       | S218  | 1           | 9             | IYHLPADEADEDEDFKQ    | IYHLPADES(1)DEDEDFKQ    | IYHLPADES(ph)DEDEDFKQ                |             | 1.1                       | 0.44779        |              | Yes                     |     |
| 381 | IPI00923056 | Sept5 protein;Septin-5;    | Sept5;Sept5;Pnut1;Sep   | S225  | 1           | 13            | FGIHVYQFPECDSDDEED   | FGIHVYQFPECDSD(1)DEED   | FGIHVYQFPECDSD(ph)DEED               | QQR         | 1.1                       | 0.36055        |              | Yes                     |     |
| 78  | IPI00457611 | Septin-9;SL3-3 integrat    | Sept9;Kiaa0991;Sint1;S  | S41   | 1           | 12            | SFEVEEIEPPNSTPPR     | SFEVEEIEPPNS(0.5)T(0.   | SFEVEEIEPPNS(ph)TTPR                 |             | 1.4                       | 0.050031       |              | No                      |     |
| 424 | IPI00457611 | Septin-9;SL3-3 integrat    | Sept9;Kiaa0991;Sint1;S  | T42   | 1           | 13            | SFEVEEIEPPNSTPPR     | SFEVEEIEPPNS(0.003)T    | SFEVEEIEPPNST(ph)PPR                 | Polo box    | 1.0                       | 0.39618        |              | Yes                     |     |
| 197 | IPI00116284 | Splicing factor 1;Zinc fir | Sf1;Zfm1;Zfp162;Sf1;Zf  | S80   | 2           | 14            | TGDLGIPNPEDRSPSP     | TGDLGIPNPEDRS(1)PS      | TGDLGIPNPEDRS(ph)PS                  | PEPINSEGR   | 1.3                       | 0.18521        |              | Yes                     |     |
| 198 | IPI00116284 | Splicing factor 1;Zinc fir | Sf1;Zfm1;Zfp162;Sf1;Zf  | S82   | 2           | 16            | TGDLGIPNPEDRSPSP     | TGDLGIPNPEDRS(1)PS      | TGDLGIPNPEDRS(ph)P                   | CAMK2       | 1.3                       | 0.18521        |              | Yes                     |     |
| 134 | IPI00420807 | Splicing factor, arginine  | Sfrs1                   | S199  | 1           | 8             | VKVDGPRSPSYGR        | VKVDGPRS(0.984)PS(0.    | VKVDGPRS(ph)PSYGR                    | WW GroupIV  | 1.3                       | 0.11386        |              | Yes                     |     |
| 690 | IPI00420807 | Splicing factor, arginine  | Sfrs1                   | S201  | 1           | 10            | VKVDGPRSPSYGR        | VKVDGPRS(0.496)PS(0.    | VKVDGPRS(ph)PSYGR                    | CAMK2       |                           |                |              | No                      |     |
| 110 | IPI00848672 | Putative uncharacterize    | Sfrs11;mcG_11658;Sfrs   | S235  | 1           | 10            | LNHVAAGLVSPSLK       | LNHVAAGLV(0.992)PS      | LNHVAAGLV(ph)PSLK                    |             | 1.4                       | 0.085157       |              | Yes                     |     |
| 235 | IPI00310880 | Splicing factor arginine   | Sfrs4;RP23-13A13.2-00   | S118  | 1           | 7             | LIVENLSSR            | LIVENLS(0.5)S(0.5)R     | LIVENLS(ph)SR                        | GSK3        | 1.2                       | 0.2253         |              | No                      |     |
| 553 | IPI00310880 | Splicing factor arginine   | Sfrs4;RP23-13A13.2-00   | S119  | 1           | 8             | LIVENLSSR            | LIVENLS(0.107)S(0.893)  | LIVENLS(ph)R                         |             | 1.1                       | 0.49397        |              | Yes                     |     |
| 356 | IPI00310880 | Putative uncharacterize    | Sfrs6;mcG_1675          | S303  | 1           | 3             | SHSPLPAPPSK          | S(0.008)HS(0.992)PLPA   | SHS(ph)PLPAPPSK                      | CAMK2       | 1.0                       | 0.34506        |              | Yes                     |     |
| 514 | IPI00120052 | Sphingosine-1-phospha      | Sgpp1;Spp1;Spph1        | S101  | 1           | 3             | RNSLTGEEGELVK        | RNS(0.999)LT(0.001)GE   | RNS(ph)LTGEEGELVK                    | PKA/AKT     | 1.1                       | 0.47231        |              | Yes                     |     |
| 294 | IPI00120052 | Sphingosine-1-phospha      | Sgpp1;Spp1;Spph1        | T103  | 1           | 5             | RNSLTGEEGELVK        | RNS(0.5)LT(0.5)GEEGEL   | RNS(ph)LTGEEGELVK                    | CK2         | 1.0                       | 0.29132        |              | No                      |     |
| 127 | IPI00828245 | SH3-domain binding pr      | Sh3bp1;AL592169.1-00    | S535  | 1           | 12            | ERTEADLPKPTPK        | ERTEADLPKPT(0.09)S(0.   | ERTEADLPKPT(ph)PK                    | WW GroupIV  | 0.9                       | 0.10384        |              | Yes                     |     |
| 133 | IPI00280250 | SH3 and PX domain-cor      | Sh3pxd2a;Fish;Sh3md1    | S1032 | 1           | 6             | AASQGSSEPLLTQQR      | AAS(0.008)QGS(0.984)E   | AASQGS(ph)ESPLLTQQR                  | CK1         | 0.9                       | 0.11065        |              | Yes                     |     |
| 185 | IPI00453688 | Signal-induced prolifere   | Sipa11;Kiaa0440;Sipa1   | S1528 | 1           | 6             | LIDLESPTPESQK        | LIDLES(0.931)PT(0.069)  | LIDLES(ph)PTPESQK                    |             | 1.3                       | 0.16802        |              | Yes                     |     |
| 203 | IPI00454140 | MCG15924, isoform CR       | Skiv2;SKI;Stk19;mcG_1   | S240  | 1           | 5             | GDNASPSPSGTPLVLR     | GDNAS(0.991)PS(0.008)   | GDNAS(ph)PSPSGTPLVLR                 | GSK3        | 0.9                       | 0.19082        |              | Yes                     |     |
| 27  | IPI00454140 | MCG15924, isoform CR       | Skiv2;SKI;Stk19;mcG_1   | S242  | 1           | 7             | GDNASPSPSGTPLVLR     | GDNAS(0.115)PS(0.655)   | GDNAS(ph)PSGTPLVLR                   |             | 0.6                       | 0.0001013      | Down         | No                      |     |
| 450 | IPI00454140 | MCG15924, isoform CR       | Skiv2;SKI;Stk19;mcG_1   | S253  | 1           | 3             | ASSLEDLVK            | AS(0.003)S(0.997)LEDL   | ASS(ph)LEDLVK                        | CHK1/2      | 1.0                       | 0.41585        |              | Yes                     |     |
| 502 | IPI00622815 | Sodium/hydrogen exch       | Slc9a1;Slc9a1;Nhe1      | S697  | 1           | 3             | LDSPTLSR             | LDS(1)PTLSR             | LDS(ph)PTLSR                         | GSK3        | 1.1                       | 0.46287        |              | Yes                     |     |
| 550 | IPI00622815 | Sodium/hydrogen exch       | Slc9a1;Slc9a1;Nhe1      | S790  | 1           | 20            | SKEPSSPGTDDVFTPGSS   | SKEPSSPGTDDVFTPGS(0.    | SKEPSSPGTDDVFTPGSS                   | CK1         | 1.1                       | 0.49299        |              | Yes                     |     |
| 46  | IPI00109311 | Na(+)/H(+) exchange re     | Slc9a3r1;Nherf;Nherf1   | S285  | 1           | 3             | SASSDTSSEELNSQDSPKR  | S(0.148)AS(0.837)S(0.0  | SAS(ph)SDTSEELNSQDS                  | CHK1/2      | 0.7                       | 0.015072       | Down         | Yes                     |     |
| 221 | IPI00229571 | SAFB-like transcription    | Sltm;Met;Sltm;Met;Sltm  | S289  | 1           | 9             | DVQDAIAQSPKEAK       | DVQDAIAQS(1)PEKEAK      | DVQDAIAQS(ph)PEKEAK                  | CDK2        | 1.2                       | 0.21304        |              | Yes                     |     |
| 460 | IPI00127941 | Small acidic protein;Sid   | Smap;Sid2057            | S15   | 1           | 2             | RSASPDDDLGSNNWEAA    | RS(0.863)AS(0.136)PDD   | RS(ph)ASPDDDLGSNNWEA                 | ADLNGNEER   | 1.0                       | 0.4232         |              | Yes                     |     |
| 432 | IPI00127941 | Small acidic protein;Sid   | Smap;Sid2057            | S17   | 1           | 3             | SASPDDDLGSNNWEAA     | S(0.13)AS(0.87)PDDDLG   | SAS(ph)PDDDLGSNNWEA                  | PKA         | 1.0                       | 0.39927        |              | Yes                     |     |
| 691 | IPI00127941 | Small acidic protein;Sid   | Smap;Sid2057            | S24   | 1           | 11            | RSASPDDDLGSNNWEAA    | RS(0.194)AS(0.194)PDD   | RSASPDDDLGSNNWEA                     | ADLNGNEER   |                           |                |              | No                      |     |
| 692 | IPI00127941 | Small acidic protein;Sid   | Smap;Sid2057            | S25   | 1           | 12            | RSASPDDDLGSNNWEAA    | RS(0.25)AS(0.25)PDDDL   | RS(ph)ASPDDDLGSNNWEA                 | CK2         |                           |                |              | No                      |     |
| 333 | IPI00396739 | SWI/SNF-related matrix     | Smarca5;Snf2h           | S65   | 1           | 32            | GGPEGGAAPAAPCAAGS    | GGPEGGAAPAAPCAAGS       | GGPEGGAAPAAPCAAGS                    | CDK2        | 1.2                       | 0.31989        |              | Yes                     |     |
| 200 | IPI00459742 | SWI/SNF complex subu       | Smarca2;Baf170;Smarca   | S283  | 1           | 8             | TLTDEVNSPDSRRR       | TLTDEVNS(1)PDSRRR       | TLTDEVNS(ph)PDSRRR                   | ERK/MAPK    | 0.9                       | 0.18612        |              | Yes                     |     |
| 164 | IPI00129918 | Survival motor neuron      | Smn1;Smn                | S25   | 2           | 6             | RGTGQSDSDIWDDTAL     | RGT(0.158)GQS(0.844)I   | RGTGQS(ph)DDSDIWDDTAL                |             | 1.3                       | 0.14443        |              | Yes                     |     |
| 184 | IPI00129918 | Survival motor neuron      | Smn1;Smn                | S28   | 2           | 9             | RGTGQSDSDIWDDTAL     | RGT(0.158)GQS(0.844)I   | RGTGQS(ph)DDSDIWDDTAL                | CK1         | 0.9                       | 0.16694        |              | Yes                     |     |
| 242 | IPI00929261 | Sntb2 protein;Beta-2-5y    | Sntb2;Sntb2;Snt2b2      | S90   | 1           | 9             | GPAGEASASPPYR        | GPAGEAS(0.024)AS(0.9)   | GPAGEASAS(ph)PPYR                    |             | 0.9                       | 0.22867        |              | Yes                     |     |
| 487 | IPI00342755 | Sorting nexin-33;SH3 ar    | Snx33;Sh3px3            | S169  | 1           | 8             | APLERQDSLASAK        | APLERQDS(1)LASAK        | APLERQDS(ph)LASAK                    | CHK1/2      | 1.1                       | 0.45112        |              | Yes                     |     |
| 245 | IPI00654133 | Protein SOLO;Protein S     | Solo;Solo;Solo;Solo;Sol | S959  | 1           | 10            | IQQLGEEASPR          | IQQLGEEAS(1)PR          | IQQLGEEAS(ph)PR                      | CDK1        | 1.0                       | 0.2339         |              | Yes                     |     |
| 693 | IPI00648688 | C-jun-amino-terminal k     | Spag9;Jip4;Jsap2;Kiaa0  | S732  | 1           | 5             | SASQSSLDKLDQELK      | S(0.065)AS(0.043)QS(0.  | SASQS(ph)SLDKLDQELK                  | CK1         |                           |                |              | No                      |     |
| 694 | IPI00648688 | C-jun-amino-terminal k     | Spag9;Jip4;Jsap2;Kiaa0  | S733  | 1           | 6             | SASQSSLDKLDQELK      | S(0.065)AS(0.043)QS(0.  | SASQS(ph)SLDKLDQELK                  | CK1         |                           |                |              | No                      |     |
| 695 | IPI00404721 | Serine protease inhibit    | Spink6;Spink6           | S93   | 1           | 1             | SSGKINKLHR           | S(0.691)S(0.309)GKINKL  | S(ph)SGKINKLHR                       | NEK6        |                           |                |              | No                      |     |
| 218 | IPI00319830 | Spectrin beta chain, bra   | Sptbn1;Elf;Sptn-2;Sptn  | S2340 | 1           | 16            | AQTLPTSVMVTIETSSSPGK | AQTLPTSVMVT(0.009)TIT   | AQTLPTSVMVTIETSSSPGK                 | Polo box    | 1.2                       | 0.20816        |              | Yes                     |     |
| 552 | IPI00319830 | Spectrin beta chain, bra   | Sptbn1;Elf;Sptn-2;Sptn  | S2102 | 1           | 4             | RPPSPDPNTK           | RPPS(0.973)PDPNT(0.0)   | RPPS(ph)PDPNTK                       | WW GroupIV  | 1.1                       | 0.49338        |              | Yes                     |     |
| 509 | IPI00605037 | Serine/arginine repetit    | Srrm1;Pop101;Srrm1;R    | S915  | 2           | 5             | KETESEAEDNLDLDER     | KET(1)ES(1)EAEDNLDL     | KET(ph)ES(ph)EAEDNLDL                | CK2         | 1.1                       | 0.469          |              | Yes                     |     |

| No  | IPI Numbers | Protein Names             | Gene Names             | pAA   | Number of P | Position in p | Peptide Sequence    | Phospho (STY) Probabil     | Modified Sequence            | Best Motifs        | Ratio <sup>1</sup> of Phd | Ratio Signific | Up-/Down-reg | Phosphosites localized? |
|-----|-------------|---------------------------|------------------------|-------|-------------|---------------|---------------------|----------------------------|------------------------------|--------------------|---------------------------|----------------|--------------|-------------------------|
| 508 | IPI00605037 | Serine/arginine repetit   | Srrm1;Pop101;Srrm1;R   | T913  | 2           | 3             | KETESAEDDNLDDLDER   | KET(1)ES(1)EAEDDNLDE       | KET(ph)ES(ph)EAEDDNL         | PKA                | 1.1                       | 0.469          |              | Yes                     |
| 318 | IPI00605037 | Serine/arginine repetit   | Srrm1;Pop101;Srrm1;R   | S220  | 1           | 3             | EKSELPPEPSVR        | EKS(1)PELPEPSVR            | EKS(ph)PELPEPSVR             | PKA                | 1.2                       | 0.31314        |              | Yes                     |
| 119 | IPI00605037 | Serine/arginine repetit   | Srrm1;Pop101;Srrm1;R   | S448  | 1           | 3             | RESPSAPKPKR         | RES(0.88)PS(0.12)PAPK      | RES(ph)PSAPKPKR              | PKA                | 0.9                       | 0.096192       |              | Yes                     |
| 320 | IPI00605037 | Serine/arginine repetit   | Srrm1;Pop101;Srrm1;R   | S450  | 1           | 5             | RESPSAPKPKR         | RES(0.051)PS(0.949)PAPK    | RES(ph)PSAPKPKR              | PKA                | 1.0                       | 0.31342        |              | Yes                     |
| 538 | IPI00605037 | Serine/arginine repetit   | Srrm1;Pop101;Srrm1;R   | S572  | 2           | 3             | RRSPSPAPKPKR        | RRS(1)PS(1)PAPKPKR         | RRS(ph)PSAPKPKR              | PKA/AKT            | 1.1                       | 0.49021        |              | Yes                     |
| 539 | IPI00605037 | Serine/arginine repetit   | Srrm1;Pop101;Srrm1;R   | S574  | 2           | 5             | RRSPSPAPKPKR        | RRS(1)PS(1)PAPKPKR         | RRS(ph)PSAPKPKR              | PKA/AKT            | 1.1                       | 0.49021        |              | Yes                     |
| 696 | IPI00605037 | Serine/arginine repetit   | Srrm1;Pop101;Srrm1;R   | S713  | 1           | 5             | APQTSPPVPR          | APQT(0.004)S(0.498)SAPQTS  | APQT(ph)SPPVPR               |                    |                           |                |              | No                      |
| 366 | IPI00605037 | Serine/arginine repetit   | Srrm1;Pop101;Srrm1;R   | S714  | 1           | 6             | APQTSPPVPR          | APQT(0.001)S(0.01)SAPQTS   | APQT(ph)SPPVPR               | Polo box           | 1.0                       | 0.35151        |              | Yes                     |
| 158 | IPI00785240 | Serine/arginine repetit   | Srrm2;Kiaa0324;Srrm2;  | S2535 | 1           | 4             | RVPSPTPVPK          | RVPS(0.906)PT(0.094)P      | RVPS(ph)PTPVPK               | PKA                | 0.9                       | 0.1344         |              | Yes                     |
| 433 | IPI00785240 | Serine/arginine repetit   | Srrm2;Kiaa0324;Srrm2;  | T2537 | 1           | 6             | RVPSPTPVPK          | RVPS(0.002)PT(0.998)P      | RVPSPT(ph)PVPK               |                    | 1.1                       | 0.39957        |              | Yes                     |
| 374 | IPI00785240 | Serine/arginine repetit   | Srrm2;Kiaa0324;Srrm2;  | S1068 | 1           | 3             | SSSPVTELTAR         | S(0.097)S(0.054)S(0.84)SSS | (ph)PVTELTAR                 | CHK1/2             | 1.1                       | 0.35687        |              | Yes                     |
| 388 | IPI00785240 | Serine/arginine repetit   | Srrm2;Kiaa0324;Srrm2;  | S1151 | 1           | 4             | DKFSPTQDRPESSTVVK   | DKFS(0.978)PT(0.022)Q      | DKFS(ph)PTQDRPESSTVVK        |                    | 1.1                       | 0.36558        |              | Yes                     |
| 317 | IPI00785240 | Serine/arginine repetit   | Srrm2;Kiaa0324;Srrm2;  | S1160 | 1           | 13            | DKFSPTQDRPESSTVVK   | DKFS(0.001)PT(0.013)Q      | DKFSPTQDRPESSTVVK            |                    | 1.2                       | 0.31307        |              | Yes                     |
| 306 | IPI00785240 | Serine/arginine repetit   | Srrm2;Kiaa0324;Srrm2;  | S1214 | 1           | 11            | SEQPLSQVLPSPK       | SEQPLSQVLP(0.5)LS(0.0)     | SEQPLSQVLP(0.5)LS(ph)SPK     |                    | 1.0                       | 0.30556        |              | No                      |
| 430 | IPI00785240 | Serine/arginine repetit   | Srrm2;Kiaa0324;Srrm2;  | S1216 | 1           | 13            | SEQPLSQVLPSPK       | SEQPLSQVLP(0.002)QVLP(0.0) | SEQPLSQVLP(0.002)QVLP(ph)SPK |                    | 1.1                       | 0.39885        |              | Yes                     |
| 498 | IPI00785240 | Serine/arginine repetit   | Srrm2;Kiaa0324;Srrm2;  | S1305 | 1           | 13            | NSGPVSEVNTGFSPEVK   | NSGPVSEVNTGFS(1)PEV        | NSGPVSEVNTGFS(ph)PEVK        |                    | 1.1                       | 0.4618         |              | Yes                     |
| 701 | IPI00785240 | Serine/arginine repetit   | Srrm2;Kiaa0324;Srrm2;  | S1338 | 1           | 2             | RSSSELSPEVVEK       | RS(0.468)S(0.468)S(0.0)    | RS(ph)SSELSPEVVEK            | PKA                |                           |                |              | No                      |
| 188 | IPI00785240 | Serine/arginine repetit   | Srrm2;Kiaa0324;Srrm2;  | S1339 | 1           | 3             | RSSSELSPEVVEK       | RS(0.02)S(0.957)S(0.02)    | RSS(ph)SSELSPEVVEK           | PKA                | 1.3                       | 0.17088        |              | Yes                     |
| 266 | IPI00785240 | Serine/arginine repetit   | Srrm2;Kiaa0324;Srrm2;  | S2070 | 1           | 5             | MSCFSRSPMSPTPLDR    | MSCFS(0.744)RPS(0.25)M     | (ox)SCFS(ph)RPSMSP           | CK1                | 1.0                       | 0.25982        |              | No                      |
| 521 | IPI00785240 | Serine/arginine repetit   | Srrm2;Kiaa0324;Srrm2;  | S2073 | 1           | 8             | MSCFSRSPMSPTPLDR    | MSCFS(0.001)RPS(0.99)      | M(ox)SCFSRSPMS(ph)M          | ox)PKA             | 1.1                       | 0.47864        |              | Yes                     |
| 698 | IPI00785240 | Serine/arginine repetit   | Srrm2;Kiaa0324;Srrm2;  | S2075 | 1           | 10            | MSCFSRSPMSPTPLDR    | MS(0.075)CFS(0.081)R       | M(ox)SCFSRSPMS(ph)P          | PLDR               |                           |                |              | No                      |
| 702 | IPI00785240 | Serine/arginine repetit   | Srrm2;Kiaa0324;Srrm2;  | S2347 | 1           | 2             | VSGRTSPLMLDR        | VS(0.456)GRT(0.087)S(0.0)  | (ph)GRTSPLM(ox)LD            | PKA                |                           |                |              | No                      |
| 346 | IPI00785240 | Serine/arginine repetit   | Srrm2;Kiaa0324;Srrm2;  | S2351 | 1           | 6             | VSGRTSPLMLDR        | VSGRT(0.006)S(0.994)P      | VSGRTS(ph)PLM(ox)LD          | PKA                | 1.0                       | 0.33946        |              | Yes                     |
| 459 | IPI00785240 | Serine/arginine repetit   | Srrm2;Kiaa0324;Srrm2;  | S2404 | 1           | 19            | MVQASSQSLPPAQDRP    | MVQASSQSLPPAQDRP           | M(ox)VQASSQSLPPAQ            | WW GroupIV         | 1.1                       | 0.42319        |              | Yes                     |
| 700 | IPI00785240 | Serine/arginine repetit   | Srrm2;Kiaa0324;Srrm2;  | S2411 | 1           | 26            | MVQASSQSLPPAQDRP    | MVQAS(0.135)S(0.079)       | M(ox)VQASSQSLPPAQ            | CK1                |                           |                |              | No                      |
| 520 | IPI00785240 | Serine/arginine repetit   | Srrm2;Kiaa0324;Srrm2;  | S821  | 1           | 1             | SGTPPRPGSVTNMQADE   | S(0.55)GT(0.441)PPRP       | S(ph)GTTPPRPGSVTNM           | (ox)QADECTATPQR    | 1.1                       | 0.47858        |              | No                      |
| 89  | IPI00785240 | Serine/arginine repetit   | Srrm2;Kiaa0324;Srrm2;  | S829  | 2           | 9             | SGTPPRPGSVTNMQADE   | S(0.493)GT(0.439)PPRP      | S(ph)GTTPPRPGSVTNM           | VTN                | 0.8                       | 0.060924       |              | No                      |
| 697 | IPI00785240 | Serine/arginine repetit   | Srrm2;Kiaa0324;Srrm2;  | T1153 | 1           | 6             | DKFSPTQDRPESSTVVK   | DKFS(0.277)PT(0.442)Q      | DKFSPT(ph)QDRPESSTVVK        |                    |                           |                |              | No                      |
| 699 | IPI00785240 | Serine/arginine repetit   | Srrm2;Kiaa0324;Srrm2;  | T2077 | 1           | 12            | MSCFSRSPMSPTPLDR    | MS(0.075)CFS(0.081)R       | M(ox)SCFSRSPMS(ph)P          | FHA1 Rad53p        |                           |                |              | No                      |
| 379 | IPI00785240 | Serine/arginine repetit   | Srrm2;Kiaa0324;Srrm2;  | T2350 | 1           | 1             | TSPLMLDR            | T(0.987)S(0.013)PLMLD      | T(ph)SPLMLDR                 | CK1                | 1.0                       | 0.35965        |              | No                      |
| 401 | IPI00785240 | Serine/arginine repetit   | Srrm2;Kiaa0324;Srrm2;  | T823  | 1           | 3             | SGTPPRPGSVTNMQADE   | S(0.194)GT(0.796)PPRP      | SGT(ph)PPRPGSVTNM            | CDK2               | 1.0                       | 0.37655        |              | Yes                     |
| 90  | IPI00785240 | Serine/arginine repetit   | Srrm2;Kiaa0324;Srrm2;  | T831  | 2           | 11            | SGTPPRPGSVTNMQADE   | S(0.493)GT(0.439)PPRP      | S(ph)GTTPPRPGSVTNM           | (ox)QADECTATPQR    | 0.8                       | 0.060924       |              | No                      |
| 102 | IPI00785240 | Serine/arginine repetit   | Srrm2;Kiaa0324;Srrm2;  | T973  | 1           | 5             | SMLQTTPDQNLGSGK     | SMLQT(1)PPDQNLGSGK         | SM(ox)LQT(ph)PPDQNL          | FHA1 Rad53p        | 0.8                       | 0.076776       |              | Yes                     |
| 273 | IPI00830670 | Sperm-specific antigen    | Ssfa2;Kiaa1927;Krap;Ss | S738  | 1           | 3             | SQSLPTLLSPVPR       | S(0.097)QS(0.901)LP        | SQSL(ph)PTLLSPVPR            | 14-3-3 binding     | 1.0                       | 0.27111        |              | Yes                     |
| 542 | IPI00830670 | Sperm-specific antigen    | Ssfa2;Kiaa1927;Krap;Ss | S90   | 1           | 6             | TPLGASLDEQSSGTPK    | TPLGAS(1)LDEQSSGTPK        | TPLGAS(ph)LDEQSSGTP          | CK2                | 1.1                       | 0.49073        |              | Yes                     |
| 405 | IPI00311020 | Sarcospan;K-ras oncoge    | Ssnp;Krag;Ssnp         | S205  | 1           | 1             | SLMASDGLQPKA        | S(0.994)LMAS(0.006)D       | S(ph)LM(ox)ASDGLQPK          | GSK3               | 1.1                       | 0.37995        |              | Yes                     |
| 540 | IPI00755329 | Translocan-associated     | Ssr1                   | S268  | 1           | 28            | VEMGTSSQNDVDMSW     | VEMGTSSQNDVDM(0.0)         | VEMGTSSQNDVDM(0.0)           | CDK2               | 1.1                       | 0.49051        |              | Yes                     |
| 289 | IPI00755329 | Translocan-associated     | Ssr1                   | T260  | 1           | 20            | VEMGTSSQNDVDMSW     | VEMGT(0.001)S(0.002)       | VEMGTSSQNDVDM(0.001)         | POET(ph)LNQINKASPR | 1.2                       | 0.28652        |              | No                      |
| 329 | IPI00131311 | Striamin protein          | Strm;Strn2             | S67   | 1           | 10            | IQALTAQLPSPLGR      | IQALTAQLPS(1)PLGR          | IQALTAQLPS(ph)PLGR           |                    | 1.2                       | 0.31818        |              | Yes                     |
| 455 | IPI00471361 | STIP1 homology and U      | Stub1;Chip             | S20   | 1           | 8             | LGTGGGGSPDKPSAQE    | LGT(0.007)GGGG(0.99)       | LGTGGGGSPDKPS(ph)P           | CDK2               | 1.0                       | 0.42157        |              | Yes                     |
| 315 | IPI00471361 | STIP1 homology and U      | Stub1;Chip             | T15   | 1           | 3             | LGTGGGGSPDKPSAQE    | LGT(0.919)GGGG(0.08)       | LGT(ph)GGGGSPDKPS            | CAMK2              | 1.0                       | 0.31043        |              | Yes                     |
| 344 | IPI00170232 | Supervillin;Archivillin;p | Svil;Svil;Svil;Svil    | S227  | 1           | 10            | SISFPEVPRSPK        | SISFPEVPRS(1)PK            | SISFPEVPRS(ph)PK             | WW GroupIV         | 1.2                       | 0.33695        |              | Yes                     |
| 467 | IPI00662157 | Synaptopodin              | Synpo;Kiaa1029         | S116  | 1           | 8             | KVMTASGSSPVPR       | KVMTAS(0.012)GS(0.80)      | KVM(ox)TASGS(ph)SSP          | CK1                | 1.1                       | 0.42682        |              | Yes                     |
| 132 | IPI00662157 | Synaptopodin              | Synpo;Kiaa1029         | S118  | 1           | 10            | KVMTASGSSPVPR       | KVMT(0.001)AS(0.017)       | KVM(ox)TASGSS(ph)P           | Polo box           | 0.9                       | 0.1102         |              | Yes                     |
| 418 | IPI00662157 | Synaptopodin              | Synpo;Kiaa1029         | S134  | 1           | 3             | STSFTEIDLK          | S(0.006)T(0.049)S(0.94)    | STS(ph)FTEIDLK               | PKA/AKT            | 1.0                       | 0.38955        |              | Yes                     |
| 454 | IPI00662157 | Synaptopodin;Synapto      | Synpo;Kiaa1029;Synpo;  | S535  | 1           | 6             | LLGQRSPLVLR         | LLGQRS(1)PVLR              | LLGQRS(ph)PVLR               |                    | 1.0                       | 0.42156        |              | Yes                     |
| 341 | IPI00662157 | Synaptopodin;Synapto      | Synpo;Kiaa1029;Synpo;  | S672  | 1           | 4             | DRASPAEAEEAVPEWAS   | DRAS(1)PAAEAEEAVPEW        | DRAS(ph)PAAEAEEAVPE          | PKA                | 1.0                       | 0.33338        |              | Yes                     |
| 703 | IPI00930819 | Transcription elongatio   | Tcea1;Tceat;Tcea1;Tce  | S107  | 1           | 7             | KKEPAISSQNSPEAR     | KKEPAIS(0.333)S(0.333)     | KKEPAIS(ph)SQNSPEAR          | GSK3               |                           |                |              | No                      |
| 704 | IPI00930819 | Transcription elongatio   | Tcea1;Tceat;Tcea1;Tce  | S108  | 1           | 8             | KKEPAISSQNSPEAR     | KKEPAIS(0.333)S(0.333)     | KKEPAIS(ph)SQNSPEAR          |                    |                           |                |              | No                      |
| 471 | IPI00930819 | Transcription elongatio   | Tcea1;Tceat;Tcea1;Tce  | S111  | 1           | 11            | KKEPAISSQNSPEAR     | KKEPAISSQNS(1)PEAR         | KKEPAISSQNS(ph)PEAR          | CK1                | 1.1                       | 0.43291        |              | Yes                     |
| 96  | IPI00828809 | Transcription factor E3;  | Tcf3;RP23-109E24.7-0   | S553  | 1           | 11            | AASDPLLSVSPAVSK     | AASDPLLSVS(0.999)PAV       | AASDPLLSVS(ph)PAVSK          | CK1                | 0.8                       | 0.06702        |              | Yes                     |
| 517 | IPI00115660 | Treacle protein;Treache   | Tcof1;Tcof1            | S169  | 1           | 13            | KSAEPLANTVLASETEEEK | KS(0.002)AEPLANTVL(0.0)    | KSAEPLANTVLAS(ph)ET          | CK2                | 1.1                       | 0.47583        |              | Yes                     |
| 547 | IPI00115660 | Treacle protein;Treache   | Tcof1;Tcof1;Tcof1      | S1191 | 1           | 3             | KLSGDLGAGAPK        | KLS(1)GDLEAGAPK            | KLS(ph)GDLEAGAPK             | PKA                | 1.1                       | 0.49212        |              | Yes                     |
| 179 | IPI00848939 | Tensin-like C1 domain-c   | Tenc1;Tns2;Tenc1;Tns2  | S1089 | 1           | 5             | HLPGSGQQPSPPAR      | HLPGS(0.862)GQQPS(0.0)     | HLPGS(ph)GQQPSPPAR           | NEK6               | 0.9                       | 0.16105        |              | Yes                     |
| 373 | IPI00848939 | Tensin-like C1 domain-c   | Tenc1;Tns2;Tenc1;Tns2  | S1094 | 1           | 10            | HLPGSGQQPSPPAR      | HLPGS(0.002)GQQPS(0.0)     | HLPGSGQQPS(ph)PPAR           |                    | 1.2                       | 0.35512        |              | Yes                     |
| 476 | IPI00848939 | Tensin-like C1 domain-c   | Tenc1;Tns2;Tenc1;Tns2  | Y483  | 1           | 8             | GPLDGSYPYIAQVQR     | GPLDGSYPY(1)AQVQR          | GPLDGSYPY(ph)AQVQR           | ALK                | 1.1                       | 0.44323        |              | Yes                     |
| 250 | IPI00807764 | 29 kDa protein            | Tfpt                   | S180  | 1           | 9             | TTATLDPTSPAPGEGP    | TTATLDPT(0.5)S(0.5)PA      | TTATLDPT(ph)SPAPGEG          | WW GroupIV         | 1.2                       | 0.23922        |              | No                      |
| 249 | IPI00807764 | 29 kDa protein            | Tfpt                   | T179  | 1           | 8             | TTATLDPTSPAPGEGP    | TTATLDPT(0.5)S(0.5)PA      | TTATLDPT(ph)SPAPGEG          | NEK6               | 1.2                       | 0.23922        |              | No                      |
| 261 | IPI00556768 | Thyroid hormone recep     | Thrap3;Trap150;Thrap3  | S243  | 1           | 7             | ASVSDLSR            | ASVSDLS(1)PR               | ASVSDLS(ph)PR                | CDK1               | 1.2                       | 0.25485        |              | Yes                     |
| 332 | IPI00556768 | Thyroid hormone recep     | Thrap3;Trap150;Thrap3  | S679  | 1           | 4             | IDISPSTFR           | IDIS(1)PSTFR               | IDIS(ph)PSTFR                |                    | 1.2                       | 0.31973        |              | Yes                     |
| 235 | IPI00556768 | Thyroid hormone recep     | Thrap3;Trap150;Thrap3  | S681  | 1           | 7             | RIDISPSTFR          | RIDIS(0.499)PS(0.499)T     | RIDIS(ph)PSTFR               |                    |                           |                |              | No                      |
| 706 | IPI00114862 | THUMP domain-containi     | Thumpd1                | S86   | 2           | 9             | FIDKDDQPSGSEGEDDD   | FIDKDDQPS(1)GS(1)EG        | FIDKDDQPS(ph)GS(ph)E         | CK2                | 0.9                       | 0.22536        |              | Yes                     |
| 237 | IPI00114862 | THUMP domain-containi     | Thumpd1                | S88   | 2           | 11            | FIDKDDQPSGSEGEDDD   | FIDKDDQPS(1)GS(1)EG        | FIDKDDQPS(ph)GS(ph)E         | CK2                | 0.9                       | 0.22536        |              | Yes                     |
| 488 | IPI00461642 | Tight junction-associate  | Tjp1;Pilt;Tjp4         | S527  | 1           | 3             | KDSLTAQEQGTVLS      | KDS(0.959)LT(0.041)QA      | KDS(ph)LTQAQEQGTVL           | CHK1/2             | 1.1                       | 0.45183        |              | Yes                     |
| 31  | IPI00828976 | Putative uncharacterize   | Tmpo;Tmpe;Tmpe;Lap2    | S277  | 1           | 9             | IDGAVISESTPIAETIK   | IDGAVISES(0.5)T(0.5)PI     | IDGAVISES(ph)TPIAETIK        |                    | 0.6                       | 0.0017421      | Down         | No                      |
| 32  | IPI00828976 | Putative uncharacterize   | Tmpo;Tmpe;Tmpe;Lap2    | T278  | 1           | 10            | IDGAVISESTPIAETIK   | IDGAVISES(0.5)T(0.5)PI     | IDGAVISES(ph)TPIAETIK        | Polo box           | 0.6                       | 0.0017421      | Down         | No                      |

| No  | IPI Numbers | Protein Names            | Gene Names              | pAA   | Number of P | Position in p | Peptide Sequence   | Phospho (STY) Probabil    | Modified Sequence          | Best Motifs        | Ratio <sup>1</sup> of Phd | Ratio Signific | Up-/Down-reg | Phosphosites localized? |
|-----|-------------|--------------------------|-------------------------|-------|-------------|---------------|--------------------|---------------------------|----------------------------|--------------------|---------------------------|----------------|--------------|-------------------------|
| 282 | IPI00896574 | Putative uncharacterize  | Tmpo;Tmpo;Tmpo;Lap      | S157  | 1           | 1             | SSTPLPTVSSSAENR    | S(0.528)S(0.236)T(0.236)  | S(ph)STPLPTVSSSAENR        | CK1                | 1.2                       | 0.28071        | No           |                         |
| 706 | IPI00896574 | Putative uncharacterize  | Tmpo;Tmpo;Tmpo;Lap      | S165  | 1           | 9             | SSTPLPTVSSSAENR    | S(0.066)S(0.047)T(0.047)  | SSTPLPTVSSSAENR            |                    |                           |                | No           |                         |
| 707 | IPI00896574 | Putative uncharacterize  | Tmpo;Tmpo;Tmpo;Lap      | S167  | 1           | 11            | SSTPLPTVSSSAENR    | S(0.066)S(0.047)T(0.047)  | SSTPLPTVSSSAENR            | CK1                |                           |                | No           |                         |
| 525 | IPI00896574 | Putative uncharacterize  | Tmpo;Tmpo;Tmpo;mc       | S66   | 2           | 6             | GPPDFSSDEEREPTVLG  | GPPDF(S)(0.777)S(0.777)   | GPPDF(S)(ph)S(ph)DEERE     | CK2                | 1.1                       | 0.48121        | Yes          |                         |
| 526 | IPI00896574 | Putative uncharacterize  | Tmpo;Tmpo;Tmpo;mc       | S67   | 2           | 7             | GPPDFSSDEEREPTVLG  | GPPDF(S)(0.777)S(0.777)   | GPPDF(S)(ph)S(ph)DEERE     | CK2                | 1.1                       | 0.48121        | Yes          |                         |
| 279 | IPI00121341 | Thioredoxin-related tra  | Tmx1;Txndc;Txndc1       | S245  | 1           | 14            | KVEEQEQAEEEDVSEEEA | KVEEQEQAEEEDV(S)1EE       | KVEEQEQAEEEDV(S)(ph)CK2    |                    | 1.2                       | 0.27982        | Yes          |                         |
| 153 | IPI00121341 | Thioredoxin-related tra  | Tmx1;Txndc;Txndc1       | S256  | 1           | 25            | KVEEQEQAEEEDVSEEEA | KVEEQEQAEEEDV(S)0.5       | KVEEQEQAEEEDV(S)(ph)GSK3   |                    | 1.3                       | 0.13214        | No           |                         |
| 300 | IPI00459443 | 182 kDa tankyrase-1-bi   | Tnks1bp1;Kiaa1741;Ta    | S1063 | 1           | 7             | MQAESQSPTNVDLDEK   | MQAESQ(0.082)QS(0.917)    | M(ox)QAESQ(S)(ph)PTNVDLDEK |                    | 1.0                       | 0.30129        | Yes          |                         |
| 708 | IPI00459443 | 182 kDa tankyrase-1-bi   | Tnks1bp1;Kiaa1741;Ta    | S1373 | 1           | 4             | SSGSLSPGLETEDEPLER | S(0.056)S(0.033)GS(0.4)   | SSGS(ph)LSPGLETEDEPLER     | CK1                |                           |                | No           |                         |
| 709 | IPI00459443 | 182 kDa tankyrase-1-bi   | Tnks1bp1;Kiaa1741;Ta    | S1375 | 1           | 6             | SSGSLSPGLETEDEPLER | S(0.056)S(0.033)GS(0.4)   | SSGS(ph)LSPGLETEDEPLER     | CK1                |                           |                | No           |                         |
| 147 | IPI00459443 | 182 kDa tankyrase-1-bi   | Tnks1bp1;Kiaa1741;Ta    | T533  | 1           | 11            | GEGVSVQVPGTTPAPES  | GEGVSVQVPGT(1)PPAP        | GEGVSVQVPGT(ph)PPA         | ERK/MAPK           | 0.9                       | 0.12659        | Yes          |                         |
| 434 | IPI00378438 | Putative uncharacterize  | Tns1                    | S1346 | 1           | 9             | TVGNTTTPSPGFR      | TVGT(0.001)NT(0.021)F     | TVGNTTTPS(ph)PGFR          | WW GroupIV         | 1.0                       | 0.40177        | Yes          |                         |
| 26  | IPI00353237 | Tensin-3;Tensin-like SH  | Tns3;Tens1              | S769  | 1           | 3             | KLISGQYDNDAAASQVTF | KL(0.998)IGQY(0.002)I     | KL(ph)IGQYDNDAAASQV        | PKA/AKT            | 2.0                       | 6.292E-05      | Up           | Yes                     |
| 594 | IPI00751137 | Putative uncharacterize  | Tomm70a                 | S92   | 1           | 8             | KTPTEGRASPALGSGHHD | KT(0.051)PEGRAS(0.753)    | KTPTEGRAS(ph)PALGSGH       | PKA                | 1.1                       | 0.47873        | Yes          |                         |
| 47  | IPI00135443 | DNA topoisomerase 2-t    | Top2b                   | S1387 | 1           | 4             | VKASPIITNDGDEFVPSD | VKAS(0.824)PIT(0.176)     | VKAS(ph)PITNDGDEFVPSD      | GDKLDEYAFSSG       | 1.5                       | 0.015322       | Up           | Yes                     |
| 372 | IPI00135443 | DNA topoisomerase 2-t    | Top2b                   | S1400 | 2           | 17            | VKASPIITNDGDEFVPSD | VKAS(0.984)PIT(0.017)     | VKAS(ph)PITNDGDEFVPSD      | DGLDKDEYAFSSG      | 1.2                       | 0.35489        | Yes          |                         |
| 710 | IPI00135443 | DNA topoisomerase 2-t    | Top2b                   | S1563 | 1           | 3             | KTSFDQDSDVDFIPSDFT | KT(0.464)S(0.464)FDQD     | KT(ph)SFDQDSDVDFIPSDFT     | SEPPALPR           |                           |                | No           |                         |
| 541 | IPI00135443 | DNA topoisomerase 2-t    | Top2b                   | S1568 | 1           | 8             | KTSFDQDSDVDFIPSDFT | KT(0.005)S(0.005)FDQD     | KTSFDQD(S)(ph)DVIDFIPSDFT  | SEPPALPR           | 1.1                       | 0.49068        | Yes          |                         |
| 311 | IPI00135443 | DNA topoisomerase 2-t    | Top2b                   | T1390 | 1           | 7             | VKASPIITNDGDEFVPSD | VKAS(0.196)PIT(0.803)     | VKASPIIT(ph)ITNDGDEFV      | CK1                | 1.2                       | 0.30745        | Yes          |                         |
| 382 | IPI00135443 | DNA topoisomerase 2-t    | Top2b                   | Y1408 | 2           | 25            | VKASPIITNDGDEFVPSD | VKAS(0.499)PIT(0.499)     | VKAS(ph)PITNDGDEFVPSD      | GDKLDEYAFSSG       | 1.0                       | 0.3607         | No           |                         |
| 254 | IPI00755183 | Tumor protein D52-like   | Tpd52l;RP23-33L3.2-0    | S189  | 1           | 7             | NSATFKSFEDR        | NSATFKS(1)FEDR            | NSATFKS(ph)FEDR            |                    | 1.2                       | 0.24246        | Yes          |                         |
| 167 | IPI00312128 | Transcription intermed   | Trim28;Krip1;Tif1b;Trin | S471  | 1           | 1             | SRSGEGEVSGLLR      | S(0.701)RS(0.299)GEGE     | S(ph)RSGEGEVSGLLR          | NIMA               | 1.3                       | 0.14593        | No           |                         |
| 555 | IPI00480497 | Tripartite motif-contain | Trim47;Trim47;Trim47    | S591  | 1           | 6             | SGALASPTDPFQSR     | SGALAS(0.994)PT(0.006)    | SGALAS(ph)PTDPFQSR         |                    | 1.1                       | 0.49457        | No           |                         |
| 711 | IPI00480497 | Tripartite motif-contain | Trim47;Trim47;Trim47    | T593  | 1           | 9             | RSGALASPTDPFQSR    | RSGALAS(0.497)PT(0.497)   | RSGALAS(ph)PTDPFQSR        |                    |                           |                | No           |                         |
| 409 | IPI00623570 | Cbp37                    | Trip12;Gtl6;cbp37       | S310  | 1           | 1             | SESPPAELPSLR       | S(0.663)ES(0.337)PPAE     | S(ph)ESPPAELPSLR           | CK1                | 1.0                       | 0.38212        | No           |                         |
| 190 | IPI00623570 | Cbp37                    | Trip12;Gtl6;cbp37       | S312  | 1           | 4             | RSEPPAELPSLR       | RS(0.108)ES(0.892)PPAE    | RSE(ph)PPAELPSLR           | 14-3-3 binding     | 0.9                       | 0.17328        | Yes          |                         |
| 304 | IPI00229801 | Transformation related   | Trp53bp1;RP23-437L13    | S267  | 1           | 6             | SEDRPSPQVSVAAVETK  | S(0.002)EDRPS(0.902)S     | SEDRPS(ph)SPQVSVAAV        | PKA                | 1.0                       | 0.30373        | Yes          |                         |
| 532 | IPI00229801 | Transformation related   | Trp53bp1;RP23-437L13    | S268  | 1           | 7             | SEDRPSPQVSVAAVETK  | SEDRPSS(1)PQVSVAAV        | SEDRPSS(ph)PQVSVAAV        | WW GroupIV         | 1.1                       | 0.48655        | Yes          |                         |
| 384 | IPI00229801 | Transformation related   | Trp53bp1;RP23-437L13    | S382  | 1           | 9             | STPFIVPSSPTEQGGGR  | STPFIVP(S)(0.057)S(0.887) | STPFIVPSS(ph)PTEQGGG       | WW GroupIV         | 1.1                       | 0.36103        | Yes          |                         |
| 7   | IPI00119314 | Tubby protein;Tubby pr   | Tub;Rd5;Tub;Rd5         | S333  | 1           | 1             | SNLMGTFKFTVYDNGVNP | S(1)NLMGTFKFTVYDNGV       | S(ph)NLMGTFKFTVYDNGV       | PKD                | 0.2                       | 8.043E-26      | Down         | Yes                     |
| 35  | IPI00115425 | Twist-related protein 1  | Twist1;Twist            | S68   | 1           | 24            | SAGGSAGPGGATGGGIG  | SAGGSAGPGGAT(0.201)       | SAGGSAGPGGATGGGIG          | ERK/MAPK           | 1.6                       | 0.0049247      | Up           | Yes                     |
| 42  | IPI00848643 | Twist homolog 2 (Dros    | Twist2;Twist2;Dermo1    | S55   | 1           | 3             | KGSPSAQSFEELQSQSR  | KGS(0.956)PS(0.022)AC     | KGS(ph)PSAQSFEELQSQSR      |                    | 1.5                       | 0.012927       | Up           | Yes                     |
| 712 | IPI00848643 | Twist homolog 2 (Dros    | Twist2;Twist2;Dermo1    | S57   | 1           | 5             | KGSPSAQSFEELQSQSR  | KGS(0.5)PS(0.5)AQSFEE     | KGS(ph)PSAQSFEELQSQSR      |                    |                           |                | No           |                         |
| 338 | IPI00113746 | Splicing factor U2AF 65  | U2af2;U2af65            | S79   | 1           | 12            | GAKEEHGGLIRSP      | GAKEEHGGLIR(S)1PR         | GAKEEHGGLIR(S)(ph)PR       | CDK1               | 1.2                       | 0.33033        | Yes          |                         |
| 497 | IPI00112597 | Ubiquitin conjugation f  | Ube4b;Ufd2;Ube4b;RP2    | S103  | 1           | 1             | SQSMIDIGVSCER      | S(0.746)QS(0.254)MDIC     | S(ph)QSMDIDIGVSCER         | NEK6               | 1.1                       | 0.46143        | No           |                         |
| 713 | IPI00420949 | Regulator of nonsense    | Upf1;Rent1;Upf1;Rent1   | S915  | 2           | 2             | ESLMQFSKPRK        | ES(1)LMQFS(1)KPRK         | ES(ph)LMQFS(ph)KPRK        | AURORA             |                           |                | Yes          |                         |
| 714 | IPI00420949 | Regulator of nonsense    | Upf1;Rent1;Upf1;Rent1   | S920  | 2           | 7             | ESLMQFSKPRK        | ES(1)LMQFS(1)KPRK         | ES(ph)LMQFS(ph)KPRK        |                    |                           |                | Yes          |                         |
| 470 | IPI00128071 | General vesicular trans  | Uso1;Vdp;Uso1;Vdp;U     | S940  | 1           | 14            | LKDLGHPVEEEDSGDQL  | LKDLGHPVEEED(S)1G         | LKDLGHPVEEED(S)(ph)GDQ     | EDDDDEIDDGDKDQ     | 1.1                       | 0.43172        | Yes          |                         |
| 148 | IPI00405227 | Vinculin;Metavinculin    | Vcl                     | S290  | 1           | 9             | GWLRDPNASPDGAGEQ   | GWLRDPNAS(1)PGDAG         | GWLRDPNAS(ph)PGDAGEQ       | AIR                | 0.9                       | 0.12659        | Yes          |                         |
| 715 | IPI00122549 | Voltage-dependent anik   | Vdac1;Vdac5;Vdac1;Vd    | S114  | 1           | 5             | LTFDSSFSPNTGKK     | LT(0.001)FDS(0.332)S(0    | LTFD(S)(ph)SFPNTGKK        |                    |                           |                | No           |                         |
| 716 | IPI00122549 | Voltage-dependent anik   | Vdac1;Vdac5;Vdac1;Vd    | S115  | 1           | 6             | LTFDSSFSPNTGKK     | LT(0.001)FDS(0.332)S(0    | LTFD(S)(ph)SFPNTGKK        | PLK1               |                           |                | No           |                         |
| 717 | IPI00122549 | Voltage-dependent anik   | Vdac1;Vdac5;Vdac1;Vd    | S117  | 1           | 8             | LTFDSSFSPNTGKK     | LT(0.001)FDS(0.332)S(0    | LTFD(S)(ph)SFPNTGKK        | CK1                |                           |                | No           |                         |
| 429 | IPI00226275 | WD repeat-containing g   | Wdr26                   | S101  | 1           | 3             | RLSQSDDEDVIR       | RLS(0.977)QS(0.023)DE     | RLS(ph)QSDEDVIR            | PKA                | 1.1                       | 0.39859        | No           |                         |
| 59  | IPI00229856 | WD repeat-containing g   | Wdr42a;D1Ucla4;H326     | S123  | 2           | 4             | DQDSSDDERALEDWVSS  | DQDS(1)S(1)DDEERALED      | DQDS(S)(ph)SDDERALED       | WVSSSETALPRPR      | 1.5                       | 0.024848       | Up           | Yes                     |
| 60  | IPI00229856 | WD repeat-containing g   | Wdr42a;D1Ucla4;H326     | S124  | 2           | 5             | DQDSSDDERALEDWVSS  | DQDS(1)S(1)DDEERALED      | DQDS(S)(ph)SDDERALED       | CK2                | 1.5                       | 0.024848       | Up           | Yes                     |
| 719 | IPI00849786 | Nuclease-sensitive elen  | Ybx1;Msy-1;Msy1;Nsep    | S166  | 1           | 9             | NYQQNYQNSSEGEKNEC  | NYQQNY(0.015)QNS(0.       | NYQQNYQNS(ph)ESGEKNEGS     | ESAPEGQAQR         |                           |                | No           |                         |
| 387 | IPI00849786 | Nuclease-sensitive elen  | Ybx1;Msy-1;Msy1;Nsep    | S168  | 1           | 11            | NYQQNYQNSSEGEKNEC  | NYQQNY(0.005)QNS(0.       | NYQQNYQNS(ph)ESGEKNEGS     | ESAPEGQAQR         | 1.1                       | 0.3638         | Yes          |                         |
| 500 | IPI00849786 | Nuclease-sensitive elen  | Ybx1;Msy-1;Msy1;Nsep    | S175  | 1           | 18            | NYQQNYQNSSEGEKNEC  | NYQQNYQNS(0.007)ES        | NYQQNYQNSSEGEKNEGS         | (ph)ESAPEGQAQR     | 1.1                       | 0.4626         | Yes          |                         |
| 121 | IPI00849786 | Nuclease-sensitive elen  | Ybx1;Msy-1;Msy1;Nsep    | S177  | 1           | 20            | NYQQNYQNSSEGEKNEC  | NY(0.008)QNNY(0.02)Q      | NYQQNYQNSSEGEKNEC          | CK2                | 0.9                       | 0.098281       | No           |                         |
| 718 | IPI00849786 | Nuclease-sensitive elen  | Ybx1;Msy-1;Msy1;Nsep    | Y163  | 1           | 6             | NYQQNYQNSSEGEKNEC  | NY(0.114)QNNY(0.373)      | NYQQNY(ph)QNSSEGEKNEGS     | ESAPEGQAQR         |                           |                | No           |                         |
| 80  | IPI00676162 | YEATS domain-containi    | Yeats2;Kiaa1197;Yeats2  | S462  | 1           | 3             | IVSGSPITSPSPPLPR   | IVS(0.924)GS(0.075)PIS    | IVS(ph)GSPITSPSPPLPR       |                    | 0.8                       | 0.052188       | No           |                         |
| 456 | IPI00515528 | Zinc finger CCCH type c  | Zc3h13                  | S242  | 1           | 7             | KAADVASPLLDQQR     | KAADVAS(1)PLLDQQR         | KAADVAS(ph)PLLDQQR         | ERK/MAPK           | 1.1                       | 0.42223        | Yes          |                         |
| 510 | IPI00461416 | Zinc finger CCCH domai   | Zc3h14                  | S515  | 1           | 10            | DLVQPKDPKASPK      | DLVQPKDPAS(1)PK           | DLVQPKDPAS(ph)PK           | WW GroupIV         | 1.1                       | 0.47088        | Yes          |                         |
| 390 | IPI00673693 | Zinc finger CCCH domai   | Zc3h18;Nhn1             | S554  | 1           | 6             | LGVSIVSPSR         | LGVSIVS(1)PSR             | LGVSIVS(ph)PSR             | CDK2               | 1.1                       | 0.36656        | Yes          |                         |
| 720 | IPI00673693 | Zinc finger CCCH domai   | Zc3h18;Nhn1             | S556  | 1           | 8             | LGVSIVSPSR         | LGVS(0.004)VS(0.498)P     | LGVSIVS(ph)PSR             | CK1                |                           |                | No           |                         |
| 369 | IPI00673693 | Zinc finger CCCH domai   | Zc3h18;Nhn1;Zc3h18;N    | S114  | 2           | 27            | GPAGSPCEEEDVVEEDG  | GPAGS(1)PCEEEDVVEE        | GPAGS(ph)PCEEEDVVEE        | DGTSDLRDEASS(ph)VT | 1.2                       | 0.35318        | No           |                         |
| 368 | IPI00673693 | Zinc finger CCCH domai   | Zc3h18;Nhn1;Zc3h18;N    | S92   | 2           | 5             | GPAGSPCEEEDVVEEDG  | GPAGS(1)PCEEEDVVEE        | GPAGS(ph)PCEEEDVVEE        | CK2                | 1.2                       | 0.35318        | Yes          |                         |
| 239 | IPI00453824 | MKIAA1227 protein;Put    | Zfp295;MKIAA1227;Zfp    | S462  | 1           | 6             | IKTEPSPSLDPSDIIR   | IKTEPS(0.906)S(0.093)P    | IKTEPS(ph)SPLDPSDIIR       | GSK3               | 1.2                       | 0.22577        | Yes          |                         |
| 721 | IPI00453824 | MKIAA1227 protein;Put    | Zfp295;MKIAA1227;Zfp    | S463  | 1           | 7             | IKTEPSPSLDPSDIIR   | IKT(0.006)EPS(0.497)S     | (IKTEPS(ph)SPLDPSDIIR      | WW GroupIV         |                           |                | No           |                         |
| 427 | IPI00467729 | Zinc finger protein 462  | Zfp462                  | S1994 | 1           | 12            | KHVQYGSVPAVSAVKG   | KHVQYGSVPAVS(1)AAV        | KHVQYGSVPAVS(ph)AAV        | KGLR               | 1.1                       | 0.39665        | Yes          |                         |
| 361 | IPI00123531 | Zinc finger protein 148  | Znf148;Zfp89;Zfp148;Z   | S306  | 1           | 15            | GGLLTSEEDSGFSTSPK  | GGLLTSEEDSGFSTS(1)P       | GGLLTSEEDSGFSTS(ph)P       | CDK1               | 1.0                       | 0.34675        | Yes          |                         |
| 139 | IPI00421031 | Zinc finger protein 521  | Znf521;Evi3;Zfp521;Znf  | S273  | 1           | 10            | HIAECPHPCSPNEDR    | HIAECPHPC(S)1PNEDR        | HIAECPHPC(S)(ph)PNEDR      | CK2                | 0.9                       | 0.11693        | Yes          |                         |
| 316 | IPI00227314 | Zinc finger protein 609  | Znf609;Kiaa0295;Zfp60   | S1057 | 1           | 3             | APSLTDLVK          | APS(0.999)LT(0.001)DL     | APS(ph)TDLVK               | PKD                | 1.2                       | 0.31059        | Yes          |                         |
| 380 | IPI00463399 | Zinc finger protein 740  | Znf740;Zfp740;Znf740    | S19   | 1           | 3             | AGSPDVLIR          | AGS(1)PDVLIR              | AGS(ph)PDVLIR              | CAMK2              | 1.1                       | 0.36021        | Yes          |                         |
| 51  | IPI00320990 | Uncharacterized protein  | KIAA1143 homolog        | S50   | 1           | 13            | IQPQLPDEDGNHSDKED  | IQPQLPDEDGNH(S)1DK        | IQPQLPDEDGNH(S)(ph)D       | CK2                | 0.7                       | 0.01748        | Down         | Yes                     |

| No      | IPI Numbers                                                                                                                                                                                                                                                                                                                                         | Protein Names | Gene Names | pAA | Number of P | Position in p | Peptide Sequence | Phospho (STY) Probabil | Modified Sequence | Best Motifs | Ratio <sup>1</sup> of Phd | Ratio Signific | Up-/Down-re | Phosphosites localized? |
|---------|-----------------------------------------------------------------------------------------------------------------------------------------------------------------------------------------------------------------------------------------------------------------------------------------------------------------------------------------------------|---------------|------------|-----|-------------|---------------|------------------|------------------------|-------------------|-------------|---------------------------|----------------|-------------|-------------------------|
| The End |                                                                                                                                                                                                                                                                                                                                                     |               |            |     |             |               |                  |                        |                   |             |                           |                |             |                         |
|         | <sup>1</sup> The ratios are normalized to correct for unequal amounts of "light" and "heavy" protein in the assay. For the peptides where a value for "Ratio of Phosphorylations (+GH/-GH), Normalized" is not listed, one or both peptide signals in the corresponding peptide pair (light and heavy) were below the threshold for quantification. |               |            |     |             |               |                  |                        |                   |             |                           |                |             |                         |
|         |                                                                                                                                                                                                                                                                                                                                                     |               |            |     |             |               |                  |                        |                   |             |                           |                |             |                         |

| Supplemental Table S4. Phosphoproteomics data from the second 5 min GH treatment experiment. |             |                         |                        |       |             |               |                     |                         |                         |                  |                           |                |            |                        |
|----------------------------------------------------------------------------------------------|-------------|-------------------------|------------------------|-------|-------------|---------------|---------------------|-------------------------|-------------------------|------------------|---------------------------|----------------|------------|------------------------|
| No                                                                                           | IPI Numbers | Protein Names           | Gene Names             | pAA   | Number of P | Position in p | Peptide Sequence    | Phospho (STY) Probabi   | Modified Sequence       | Best Motif       | Ratio <sup>1</sup> of Phc | Ratio Signific | Up-/Down-r | Localized phosphosite? |
| 676                                                                                          | IPI00229328 | 1110037F02Rik protein   | 1110037F02Rik;Kiaa14   | S1627 | 1           | 7             | SFLSEPPSPGR         | SFLSEPS(0.5)S(0.5)PGR   | SFLSEPS(ph)SPGR         | CK1              | 1.0                       | 0.34135        | No         |                        |
| 677                                                                                          | IPI00229328 | 1110037F02Rik protein   | 1110037F02Rik;Kiaa14   | S1628 | 1           | 8             | SFLSEPPSPGR         | SFLSEPS(0.5)S(0.5)PGR   | SFLSEPS(ph)SPGR         | WW GroupIV       | 1.0                       | 0.34135        | No         |                        |
| 421                                                                                          | IPI00336929 | Phostensin;Protein phc  | 2310014H01Rik;RP24     | S5510 | 1           | 7             | SCLVKGSPER          | SCLVKG(1)PER            | SCLVKG(ph)PER           | CDK2             | 1.0                       | 0.2203         | Yes        |                        |
| 79                                                                                           | IPI00109044 | Putative uncharacterize | 2900073G15Rik;mcG      | S20   | 1           | 3             | ATSNVFMFQDSQIQEAF   | AT(0.082)S(0.918)NVFAMF | AT(0.082)S(0.918)NVFAMF | CDK2             | 0.6                       | 0.002444       | Down       | Yes                    |
| 100                                                                                          | IPI00109044 | Putative uncharacterize | 2900073G15Rik;mcG      | T19   | 1           | 2             | ATSNVFMFQDSQIQEAF   | AT(0.5)S(0.5)NVFAMF     | AT(0.5)S(0.5)NVFAMF     | PKA              | 0.6                       | 0.0012963      | Down       | Yes                    |
| 445                                                                                          | IPI00874907 | Putative uncharacterize | 4933425L03Rik          | S472  | 1           | 11            | AGEEDEGEVDSDDPETS   | AGEEDEGEVDS(0.902)T     | AGEEDEGEVDS(ph)DSDPETS  | SAK              | 1.2                       | 0.2326         | Yes        |                        |
| 299                                                                                          | IPI00223634 | Ankyrin repeat-contain  | 6330439K17Rik;RP23     | S541  | 2           | 3             | LISATVHEDGVEYSIR    | LIS(0.982)AT(1)VHEDG    | LIS(ph)AT(ph)VHEDG      | CHK1             | 0.9                       | 0.12587        | Yes        |                        |
| 300                                                                                          | IPI00223634 | Ankyrin repeat-contain  | 6330439K17Rik;RP23     | T543  | 2           | 5             | LISATVHEDGVEYSIR    | LIS(0.982)AT(1)VHEDG    | LIS(ph)AT(ph)VHEDG      | CK2              | 0.9                       | 0.12587        | Yes        |                        |
| 313                                                                                          | IPI00458153 | Uncharacterized protei  | 6330577E15Rik;63305    | S67   | 1           | 5             | ENPPSPPTSPAAPQPR    | ENPPS(0.967)PPT(0.01    | ENPPS(ph)PPTSPAAP       | WW GroupIV       | 0.9                       | 0.14004        | Yes        |                        |
| 575                                                                                          | IPI00458153 | Uncharacterized protei  | 6330577E15Rik;63305    | S71   | 2           | 9             | ENPPSPPTSPAAPQPR    | ENPPS(0.082)PPT(0.95    | ENPPSPPT(ph)S(ph)PA     | WW GroupIV       | 1.2                       | 0.28816        | Yes        |                        |
| 576                                                                                          | IPI00458153 | Uncharacterized protei  | 6330577E15Rik;63305    | T70   | 2           | 8             | ENPPSPPTSPAAPQPR    | ENPPS(0.082)PPT(0.95    | ENPPSPPT(ph)S(ph)PA     | CK1              | 1.2                       | 0.28816        | Yes        |                        |
| 256                                                                                          | IPI00753321 | Antigen containing epit | A230054D04Rik;AF013    | S2920 | 1           | 14            | SVSETSEDKKDEESDEEE  | SVSETSEDKKDEES(1)DE     | SVSETSEDKKDEES(ph)      | CK2              | 0.9                       | 0.099002       | Yes        |                        |
| 680                                                                                          | IPI00458612 | AP2-associated protein  | Aak1;Kiaa1048;Aak1,Ki  | S621  | 2           | 8             | VGSLTPPSPK          | VGSLT(0.105)PPS(0.914   | VGSLTPPS(ph)S(ph)PK     | PKA              | 1.0                       | 0.34209        | Yes        |                        |
| 562                                                                                          | IPI00458612 | AP2-associated protein  | Aak1;Kiaa1048;Aak1,Ki  | S622  | 2           | 9             | VGSLTPPSPK          | VGSLT(0.105)PPS(0.914   | VGSLTPPS(ph)S(ph)PK     | WW GroupIV       | 1.0                       | 0.28288        | Yes        |                        |
| 1403                                                                                         | IPI00762360 | ATP-binding cassette, s | Abcf1                  | S187  | 1           | 1             | SKPAAADSEGEEDTAK    | S(0.343)KPAAAD(0.32     | S(ph)KPAAADSEGEEDTAK    |                  |                           |                | No         |                        |
| 1005                                                                                         | IPI00762360 | ATP-binding cassette, s | Abcf1                  | S194  | 1           | 8             | SKPAAADSEGEEDTAK    | SKPAAAD(1)EGEEEDT       | SKPAAAD(ph)EGEEEDT      | CK2              | 1.1                       | 0.47857        | Yes        |                        |
| 974                                                                                          | IPI00762360 | ATP-binding cassette, s | Abcf1;Abcf1            | S103  | 1           | 3             | QLSVPASDEEDEVPAIP   | QLS(0.851)VPAS(0.149    | QLS(ph)VPASDEEDEV       | GSK3             | 1.1                       | 0.46542        | Yes        |                        |
| 900                                                                                          | IPI00762360 | ATP-binding cassette, s | Abcf1;Abcf1            | S107  | 1           | 7             | QLSVPASDEEDEVPAIP   | QLSVPAS(1)DEEDEVPAI     | QLSVPAS(ph)DEEDEV       | CK2              | 1.1                       | 0.43963        | Yes        |                        |
| 612                                                                                          | IPI00762360 | ATP-binding cassette, s | Abcf1;Abcf1            | S138  | 1           | 13            | GGNVFALIQQDSEEEEE   | GGNVFALIQQD(1)EE        | GGNVFALIQQD(ph)         | CK2              | 1.0                       | 0.30591        | Yes        |                        |
| 451                                                                                          | IPI00798483 | Abl interactor 1;Abelso | Abi1;Sh3bp1;Abi1;RP2   | S296  | 1           | 3             | HNSSTTSSTGGYR       | HNS(0.804)T(0.079)T     | HNS(ph)TTSSTGGYR        | PKD              | 1.0                       | 0.23412        | Yes        |                        |
| 827                                                                                          | IPI00467530 | Actin-binding LIM prot  | Ablim1;Ablim;Kiaa0055  | S475  | 1           | 3             | TLSPTPSAEGYQDVR     | T(0.089)LS(0.869)PT(0   | TLSPTPSAEGYQDVR         | PKA/AKT          | 1.0                       | 0.40352        | Yes        |                        |
| 208                                                                                          | IPI00467530 | Actin-binding LIM prot  | Ablim1;Ablim;Kiaa0055  | S479  | 2           | 7             | TLSPTPSAEGYQDVR     | T(0.473)LS(0.43)PT(0.2  | T(ph)LSPTPS(ph)AEGY     | CK1              | 0.8                       | 0.061165       | No         |                        |
| 1096                                                                                         | IPI00467530 | Actin-binding LIM prot  | Ablim1;Ablim;Kiaa0055  | S494  | 1           | 1             | STSQGSINSVPYSR      | S(0.475)T(0.262)S(0.26  | S(ph)TSQGSINSVPYSR      |                  |                           |                | No         |                        |
| 1100                                                                                         | IPI00467530 | Actin-binding LIM prot  | Ablim1;Ablim;Kiaa0055  | T473  | 2           | 1             | TLSPTPSAEGYQDVR     | T(0.473)LS(0.43)PT(0.2  | T(ph)LSPTPS(ph)AEGY     | CK1              |                           |                | No         |                        |
| 28                                                                                           | IPI00848443 | Acetyl-CoA carboxylase  | Acaca;Acac;Gm738;Ac    | S67   | 1           | 11            | FIIGSVSEDNSEDEISNLV | FIIGSVSEDN(1)EISNLV     | FIIGSVSEDN(ph)EISNLV    | CK2              | 0.2                       | 2.298E-25      | Down       | Yes                    |
| 1401                                                                                         | IPI00922962 | Apoptotic chromatin cc  | Acin1;RP23-94B13.1-0   | S895  | 1           | 23            | SLIPDIKPLAGQEAIVDLH | SLIPDIKPLAGQEAIVDLH     | SLIPDIKPLAGQEAIVDLH     | HADD(1)RISEDETER |                           |                | No         |                        |
| 452                                                                                          | IPI00922962 | Apoptotic chromatin cc  | Acin1;RP23-94B13.1-0   | S898  | 1           | 26            | SLIPDIKPLAGQEAIVDLH | S(0.005)LIPDIKPLAGQE    | SLIPDIKPLAGQEAIVDLH     | PKA              | 1.2                       | 0.2342         | No         |                        |
| 1402                                                                                         | IPI00922962 | Apoptotic chromatin cc  | Acin1;RP23-94B13.1-0   | T902  | 1           | 30            | SLIPDIKPLAGQEAIVDLH | S(0.009)LIPDIKPLAGQE    | SLIPDIKPLAGQEAIVDLH     | HADD(1)RISEDETER |                           |                | No         |                        |
| 408                                                                                          | IPI00911143 | Apoptotic chromatin cc  | Acin1;RP23-94B13.1-0   | S886  | 1           | 14            | EAVVDLHADD(1)RISEDE | EAVVDLHADD(0.175)F      | EAVVDLHADD(1)RISEDE     | PKA              | 1.0                       | 0.21153        | Yes        |                        |
| 666                                                                                          | IPI00922962 | Apoptotic chromatin cc  | Acin1;RP23-94B13.1-0   | S1003 | 1           | 6             | TAQVPSPPR           | TAQVPS(1)PPR            | TAQVPS(ph)PPR           | ERK/MAPK         | 1.2                       | 0.33752        | Yes        |                        |
| 945                                                                                          | IPI00922962 | Apoptotic chromatin cc  | Acin1;RP23-94B13.1-0   | S477  | 1           | 3             | SLSPLSGTTDTK        | S(0.606)LS(0.393)PLS(0  | S(ph)SPLSGTTDTK         | NEK6             | 1.1                       | 0.45474        | No         |                        |
| 511                                                                                          | IPI00922962 | Apoptotic chromatin cc  | Acin1;RP23-94B13.1-0   | S479  | 1           | 1             | SLSPLSGTTDTK        | S(0.013)LS(0.985)PLSG   | SLS(ph)SPLSGTTDTK       | CHK1/2           | 1.0                       | 0.26193        | No         |                        |
| 924                                                                                          | IPI00922962 | Apoptotic chromatin cc  | Acin1;RP23-94B13.1-0   | S482  | 1           | 6             | SLSPLSGTTDTK        | S(0.167)LS(0.147)PLS(0  | SLS(ph)SPLSGTTDTK       | CK1              | 1.1                       | 0.44719        | No         |                        |
| 118                                                                                          | IPI00922962 | Apoptotic chromatin cc  | Acin1;RP23-94B13.1-0   | S710  | 1           | 3             | HLSHPEPEQQHVIR      | HLS(1)HPEPEQQHVIR       | HLS(ph)HPEPEQQHVIR      | PIM1/2           | 1.7                       | 0.0034146      | Up         | Yes                    |
| 647                                                                                          | IPI00922962 | Apoptotic chromatin cc  | Acin1;RP23-94B13.1-0   | S216  | 1           | 11            | SSSFSSEKESDDEKPR    | SSSFS(0.001)EEKGES(0.   | SSSFSSEKES(ph)DDE       | CK2              | 1.2                       | 0.32598        | Yes        |                        |
| 617                                                                                          | IPI00126248 | Putative uncharacterize | Acly;Acly;RP23-39213.9 | S481  | 1           | 12            | AKPAMPQDSVPSPR      | AKPAMPQDS(0.004)VP      | AKPAMPQDSVPS(ph)P       | ERK/MAPK         | 1.2                       | 0.30928        | Yes        |                        |
| 200                                                                                          | IPI00314443 | Putative uncharacterize | Adam17;Adam17;Tace     | S813  | 1           | 1             | SFEDLTHPVR          | S(1)FEDLTHPVR           | S(ph)FEDLTHPVR          | CK1              | 0.8                       | 0.055126       | Yes        |                        |
| 170                                                                                          | IPI00136000 | Alpha-adducin;Erythro   | Add1;Add1              | S427  | 1           | 22            | KYSDVEVPASVTGHFSFAS | KYS(0.001)DVEVPASVT     | KYSDVEVPASVTGHFSF       | F box bTrCP      | 0.8                       | 0.035387       | Down       | No                     |
| 1394                                                                                         | IPI00136000 | Alpha-adducin;Erythro   | Add1;Add1              | S431  | 1           | 25            | YSDVEVPASVTGHFSFAS  | YSDVEVPASVTGHFSFAS      | YSDVEVPASVTGHFSF        | F box bTrCP      |                           |                | No         |                        |
| 1395                                                                                         | IPI00136000 | Alpha-adducin;Erythro   | Add1;Add1              | S436  | 1           | 30            | YSDVEVPASVTGHFSFAS  | YSDVEVPASVTGHFSFAS      | YSDVEVPASVTGHFSF        | PKA              |                           |                | No         |                        |
| 714                                                                                          | IPI00136000 | Alpha-adducin;Erythro   | Add1;Add1              | S465  | 1           | 13            | GDDASEEGQNGSSPK     | GDDASEEGQNGS(0.087      | GDDASEEGQNGSS(ph)       | Polo box         | 1.0                       | 0.35742        | Yes        |                        |
| 1396                                                                                         | IPI00136000 | Alpha-adducin;Erythro   | Add1;Add1              | T429  | 1           | 23            | YSDVEVPASVTGHFSFAS  | YSDVEVPASVTGHFSFAS      | YSDVEVPASVTGHFSF        | CSPLRHSFK        |                           |                | No         |                        |
| 447                                                                                          | IPI00387580 | Gamma-adducin;Adduc     | Add3;Add1;Add3;Add1    | S677  | 1           | 10            | TEEVLSPDGSPKSPK     | TEEVLSPDGS(0.801)PSI    | TEEVLSPDGS(ph)PSK       | CDK2             | 1.0                       | 0.2332         | Yes        |                        |
| 809                                                                                          | IPI00387580 | Gamma-adducin;Adduc     | Add3;Add1;Add3;Add1    | S679  | 1           | 12            | TEEVLSPDGSPKSPK     | TEEVLSPDGS(0.076)PSI    | TEEVLSPDGS(ph)PSK       | GSK3             | 1.0                       | 0.39558        | Yes        |                        |
| 532                                                                                          | IPI00387580 | Gamma-adducin;Adduc     | Add3;Add1;Add3;Add1    | S681  | 1           | 14            | TEEVLSPDGSPKSPK     | TEEVLSPDGS(0.005)PSI    | TEEVLSPDGS(ph)PSK       | CDK2             | 1.0                       | 0.26792        | Yes        |                        |
| 163                                                                                          | IPI00387580 | Gamma-adducin;Adduc     | Add3;Add1;Add3;Add1    | S683  | 1           | 16            | TEEVLSPDGSPKSPK     | TEEVLSPDGS(0.113)PSI    | TEEVLSPDGS(ph)PSK       | CK1              | 0.8                       | 0.03083        | Down       | No                     |
| 1241                                                                                         | IPI00387580 | Gamma-adducin;Adduc     | Add3;Add1;Add3;Add1    | T668  | 1           | 1             | TEEVLSPDGSPKSPK     | T(0.223)EVL(1.01)PD     | T(ph)EVLSPDGSPKSPK      |                  |                           |                | No         |                        |
| 805                                                                                          | IPI00467327 | Actin filament-associat | Afap1;Kiaa3018         | S669  | 1           | 8             | SGTSSPQSPVFR        | SGTSSPQS(1)PVFR         | SGTSSPQS(ph)PVFR        | WW GroupIV       | 1.0                       | 0.39438        | Yes        |                        |
| 742                                                                                          | IPI00420172 | Arf-GAP domain and FC   | Afg1;Hrb;Rip;Afg1;H    | S181  | 1           | 6             | GTPSQSPVGR          | GTPSQS(1)PVGR           | GTPSQS(ph)PVGR          | CK1              | 1.0                       | 0.369          | Yes        |                        |
| 1379                                                                                         | IPI00553798 | Ahnak protein           | Ahnak                  | S111  | 1           | 2             | SSEVLSGDDEYQYR      | S(0.293)S(0.331)EVL     | SS(ph)EVLSDGDEYQYR      | PKA              |                           |                | No         |                        |
| 505                                                                                          | IPI00553798 | Ahnak protein           | Ahnak                  | S116  | 1           | 7             | SSEVLSGDDEYQYR      | SSEVLS(1)GDDEYQYR       | SSEVLS(ph)GDDEYQYR      |                  | 1.0                       | 0.25954        | Yes        |                        |
| 34                                                                                           | IPI00553798 | Ahnak protein           | Ahnak                  | S136  | 1           | 3             | LRSDEGVGDLGETQSR    | LRS(1)EDGVEGLGETQ       | LRS(ph)EDGVEGLGETQ      | CAMK2            | 4.5                       | 3.024E-16      | Up         | Yes                    |
| 1378                                                                                         | IPI00553798 | Ahnak protein           | Ahnak                  | S149  | 1           | 16            | LRSDEGVGDLGETQSR    | LRS(0.12)EDGVEGLGET     | LRSDEGVGDLGET(ph)QSR    |                  |                           |                | No         |                        |
| 637                                                                                          | IPI00553798 | Ahnak protein           | Ahnak                  | S211  | 1           | 3             | LPSGSGPASPTTGSVAVD  | LPS(0.999)GS(0.001)GP   | LPS(ph)GSGPASPTTGS      | PKD              | 1.0                       | 0.32037        | Yes        |                        |
| 437                                                                                          | IPI00553798 | Ahnak protein           | Ahnak                  | S213  | 2           | 5             | LPSGSGPASPTTGSVAVD  | LPS(0.077)GS(0.923)GP   | LPSGSGPASPTTGS(ph)P     | GSK3             | 1.0                       | 0.22784        | Yes        |                        |
| 222                                                                                          | IPI00553798 | Ahnak protein           | Ahnak                  | S217  | 1           | 9             | LPSGSGPASPTTGSVAVD  | LPS(0.005)GS(0.001)GP   | LPSGSGPASPTTGS(ph)P     | WW GroupIV       | 1.4                       | 0.06832        | Yes        |                        |
| 1377                                                                                         | IPI00553798 | Ahnak protein           | Ahnak                  | S222  | 2           | 14            | LPSGSGPASPTTGSVAVD  | LPS(0.294)GS(0.39)GP    | LPSGSGPASPTTGS(ph)P     | AVDIR            |                           |                | No         |                        |
| 51                                                                                           | IPI00553798 | Ahnak protein           | Ahnak                  | S4890 | 1           | 9             | FKAEPALPSK          | FKAEPALPS(1)PK          | FKAEPALPS(ph)PK         | CDK1             | 2.5                       | 6.232E-07      | Up         | Yes                    |
| 157                                                                                          | IPI00553798 | Ahnak protein           | Ahnak                  | S5099 | 1           | 7             | GDLGASSPSMK         | GDLGAS(0.007)S(0.986    | (ca)GDLGASS(ph)PSM      | Polo box         | 0.8                       | 0.027932       | Down       | Yes                    |
| 165                                                                                          | IPI00553798 | Ahnak protein           | Ahnak                  | S5101 | 1           | 9             | GDLGASSPSMK         | GDLGAS(0.001)S(0.01)H   | (ca)GDLGASS(ph)JM       | CK1              | 0.8                       | 0.031585       | Down       | Yes                    |
| 279                                                                                          | IPI00553798 | Ahnak protein           | Ahnak                  | S5333 | 1           | 16            | GPSFNVASPESDFGVSLK  | GPSFNVASPESDFGV(1)      | GPSFNVASPESDFGV(ph)     | LKGP             | 0.9                       | 0.10943        | Yes        |                        |
| 743                                                                                          | IPI00553798 | Ahnak protein           | Ahnak                  | S5504 | 1           | 6             | GGVTGSPASISGSK      | GGVTGS(1)PEASISGSK      | GGVTGS(ph)PEASISG       | GSK3             | 1.0                       | 0.37001        | Yes        |                        |
| 117                                                                                          | IPI00553798 | Ahnak protein           | Ahnak                  | S5510 | 1           | 14            | GKGGVTGSPASISGSK    | GKGGVT(0.001)GS(0.0     | GKGGVTGSPASIS(ph)G      | GSKDLK           | 0.7                       | 0.0027616      | Down       | Yes                    |

| No   | IPI Numbers | Protein Names            | Gene Names            | pAA   | Number of P | Position in p | Peptide Sequence   | Phospho (STY) Probabi  | Modified Sequence            | Best Motif     | Ratio <sup>1</sup> of Ph | Ratio Signif | Up-/Down-r | Localized phosphosite? |
|------|-------------|--------------------------|-----------------------|-------|-------------|---------------|--------------------|------------------------|------------------------------|----------------|--------------------------|--------------|------------|------------------------|
| 72   | IPI00553798 | Ahnak protein            | Ahnak                 | S5512 | 1           | 14            | GGVTGSPEASISGSKGDL | GGVTGSPEAS(0.006)IS    | _GGVTGSPEASISGS(ph)          | CK1            | 0.6                      | 7.486E-05    | Down       | Yes                    |
| 359  | IPI00553798 | Ahnak protein            | Ahnak                 | S5518 | 2           | 1             | SSKASLGSLEGEVEAEAS | S(0.528)S(0.489)KAS(0  | _S(ph)S(ph)KASLGSLEGE        | GSK3           | 0.9                      | 0.17445      |            | No                     |
| 1382 | IPI00553798 | Ahnak protein            | Ahnak                 | S5519 | 2           | 2             | SSKASLGSLEGEVEAEAS | S(0.528)S(0.489)KAS(0  | _S(ph)S(ph)KASLGSLEGE        | NEK6           |                          |              |            | No                     |
| 465  | IPI00553798 | Ahnak protein            | Ahnak                 | S5522 | 1           | 2             | ASLGSLEGEVEAEASSPK | AS(0.813)LGS(0.182)LE  | AS(ph)LGSLEGEVEAEAE          | AURORA         | 1.2                      | 0.24139      |            | Yes                    |
| 864  | IPI00553798 | Ahnak protein            | Ahnak                 | S5525 | 1           | 5             | ASLGSLEGEVEAEASSPK | ASLGS(1)LEGEVEAEASS    | ASLGS(ph)LEGEVEAEAE          | CK1            | 1.1                      | 0.42219      |            | Yes                    |
| 214  | IPI00553798 | Ahnak protein            | Ahnak                 | S5535 | 1           | 15            | ASLGSLEGEVEAEASSPK | AS(0.052)LGS(0.052)LE  | ASLGSLEGEVEAEAS(ph)SPK       |                | 0.8                      | 0.064438     |            | No                     |
| 225  | IPI00553798 | Ahnak protein            | Ahnak                 | S5536 | 1           | 16            | ASLGSLEGEVEAEASSPK | ASLGSLEGEVEAEASS(1)    | ASLGSLEGEVEAEASS(ph)Polo box |                | 1.4                      | 0.071596     |            | Yes                    |
| 101  | IPI00553798 | Ahnak protein            | Ahnak                 | S5553 | 1           | 1             | SNSFSDER           | S(0.955)NS(0.044)FS(0  | _S(ph)SNSFSDER               | PIM1/2         | 0.7                      | 0.0013621    | Down       | Yes                    |
| 97   | IPI00553798 | Ahnak protein            | Ahnak                 | S5555 | 1           | 3             | SNSFSDER           | S(0.001)NS(0.999)FS(0  | _SNS(ph)FSDER                | PKA/AKT        | 0.6                      | 0.0011776    | Down       | Yes                    |
| 210  | IPI00553798 | Ahnak protein            | Ahnak                 | S5557 | 1           | 7             | HRSNSFSDER         | HRS(0.081)NS(0.047)FS  | (ca)HRSNSFSDER               | CK1            | 1.4                      | 0.061857     |            | Yes                    |
| 93   | IPI00553798 | Ahnak protein            | Ahnak                 | S5563 | 1           | 3             | EFSAPTPTGTLEFAGGD  | EF(0.988)APS(0.012)TT  | EF(ph)APSTPTGTLEF            | CAMK2          | 0.6                      | 0.000947     | Down       | Yes                    |
| 1371 | IPI00553798 | Ahnak protein            | Ahnak                 | S5566 | 2           | 6             | EFSAPTPTGTLEFAGGD  | EF(0.988)APS(0.042)IT  | EF(ph)APS(ph)TPTGT           | CK1            |                          |              |            | No                     |
| 755  | IPI00553798 | Ahnak protein            | Ahnak                 | S5607 | 1           | 10            | SKGHYEVTGSDDEAGKL  | SKGHYEVTGS(1)DDEAG     | _SKGHYEVTGS(ph)DDE           | CK2            | 1.0                      | 0.37371      |            | Yes                    |
| 1372 | IPI00553798 | Ahnak protein            | Ahnak                 | S5617 | 1           | 20            | SKGHYEVTGSDDEAGKL  | S(0.004)KGHY(0.004)EV  | SKGHYEVTGSDDEAGK             | NEK6           |                          |              |            | No                     |
| 1373 | IPI00553798 | Ahnak protein            | Ahnak                 | S5620 | 1           | 23            | SKGHYEVTGSDDEAGKL  | S(0.004)KGHY(0.004)EV  | SKGHYEVTGSDDEAGK             | CK1            |                          |              |            | No                     |
| 1375 | IPI00553798 | Ahnak protein            | Ahnak                 | S5623 | 1           | 26            | SKGHYEVTGSDDEAGKL  | S(0.004)KGHY(0.004)EV  | SKGHYEVTGSDDEAGK             | CK1            |                          |              |            | No                     |
| 1385 | IPI00553798 | Ahnak protein            | Ahnak                 | T147  | 1           | 14            | LRSEdGVEGDLGELTQSR | LRS(0.12)EDGVEGDLGE    | _LRSEdGVEGDLGELT(ph)         | NEK6           |                          |              |            | No                     |
| 1386 | IPI00553798 | Ahnak protein            | Ahnak                 | T205  | 2           | 1             | TVIRLPSGSGPASPTTGA | T(0.342)VIRLPS(0.265)G | _T(ph)VIRLPSGSGPASPTT        | (ph)GSAVDIR    |                          |              |            | No                     |
| 1384 | IPI00553798 | Ahnak protein            | Ahnak                 | T219  | 1           | 11            | LPSGSGPASPTTGSADV  | LPSGSGPAS(0.481)PT(0   | _LPSGSGPAS(ph)PTTGS          | FHA KAPP       |                          |              |            | No                     |
| 201  | IPI00553798 | Ahnak protein            | Ahnak                 | T220  | 1           | 12            | LPSGSGPASPTTGSADV  | LPSGS(0.01)GPAS(0.08   | _LPSGSGPASPTT(ph)GS          | CK1            | 1.4                      | 0.055541     |            | No                     |
| 230  | IPI00553798 | Ahnak protein            | Ahnak                 | T5567 | 1           | 7             | EFSAPTPTGTLEFAGGD  | EF(0.013)APS(0.102)TT  | EFSAPT(ph)PTGTLEF            | WW GroupIV     | 1.4                      | 0.074758     |            | Yes                    |
| 95   | IPI00553798 | Ahnak protein            | Ahnak                 | T5569 | 2           | 9             | EFSAPTPTGTLEFAGGD  | EFSA(0.071)T(0.496)    | EFSAPT(ph)PTGT(ph)           | CK1            | 0.6                      | 0.0011054    | Down       | No                     |
| 105  | IPI00553798 | Ahnak protein            | Ahnak                 | T5571 | 2           | 11            | EFSAPTPTGTLEFAGGD  | EFSA(0.071)T(0.496)    | EFSAPT(ph)PTGT(ph)           | LEFAGGD        | 0.7                      | 0.0016383    | Down       | Yes                    |
| 96   | IPI00553798 | Ahnak protein            | Ahnak                 | T5571 | 2           | 11            | EFSAPTPTGTLEFAGGD  | EFSA(0.071)T(0.496)    | EFSAPT(ph)PTGT(ph)           | CK1            | 0.6                      | 0.0011054    | Down       | No                     |
| 673  | IPI00553798 | Ahnak protein            | Ahnak                 | T5605 | 1           | 6             | GHYEVTGSDDEAGLQ    | GHY(0.002)EVT(0.802)G  | (ca)GHYEVT(ph)GSD            | FHA1 Rad53p    | 1.2                      | 0.34115      |            | Yes                    |
| 1387 | IPI00553798 | Ahnak protein            | Ahnak                 | Y5602 | 1           | 3             | GHYEVTGSDDEAGLQ    | GHY(0.317)EVT(0.124)G  | GHY(ph)EVTGSDDEAGL           | QSGVSLASK      |                          |              |            | No                     |
| 312  | IPI00553798 | Ahnak protein;Desmoy     | Ahnak;Ahnak           | S893  | 1           | 3             | AESEPMENVLPK       | AE(1)PEMENVLPK         | AE(1)PEMENVLPK               |                | 0.9                      | 0.13854      |            | Yes                    |
| 834  | IPI00553798 | Ahnak protein;Ahnak p    | Ahnak;Ahnak;mcG       | T107  | 1           | 18            | KGDRSPEPGQTWTHEV   | KGDRSPEPGQT(0.009)Y    | KGDRSPEPGQTWTHEV             | GSK3           | 1.0                      | 0.40759      |            | Yes                    |
| 941  | IPI00553798 | Ahnak protein;Ahnak p    | Ahnak;Ahnak;mcG       | T107  | 1           | 5             | KGDRSPEPGQTWTHEV   | KGDRS(1)PEPGQTWTH      | KGDRS(ph)PEPGQTWTHE          | VFSSR          | 1.1                      | 0.4542       |            | Yes                    |
| 1047 | IPI00553798 | Ahnak protein;Ahnak p    | Ahnak;Ahnak;mcG       | T102  | 1           | 13            | KGDRSPEPGQTWTHEV   | KGDRS(0.002)PEPGQT     | KGDRSPEPGQTWTH               | (ph)HEVFSSR    | 1.1                      | 0.49552      |            | No                     |
| 1017 | IPI00850843 | Putative uncharacterize  | Ahnak2;AI450948       | S286  | 1           | 3             | DMSPTDTEVHR        | DMS(0.982)PT(0.017)S   | _DMS(ph)PTDTEVHR             | CAMK2          | 1.1                      | 0.48437      |            | Yes                    |
| 652  | IPI00677756 | AHNAK nucleoprotein      | Ahnak2;AI450948       | S35   | 1           | 3             | KLSFSMPR           | KL(0.998)FS(0.002)MP   | KL(ph)FSMPR                  | PKA/AKT        | 1.0                      | 0.33001      |            | Yes                    |
| 61   | IPI00677756 | AHNAK nucleoprotein      | Ahnak2;AI450948       | S652  | 1           | 6             | DTTQRSVPVHQPTAR    | DT(0.025)T(0.136)QRS   | DTTQRS(ph)PVVHQPT            | CK1            | 2.4                      | 4.127E-06    | Up         | Yes                    |
| 533  | IPI00230591 | A kinase anchor protei   | Akap1;Akap;Akap1,RP2  | S88   | 1           | 3             | RLSEACPGVLSVAPT    | RLS(1)EEACPGVLSVAPT    | RLS(ph)EEACPGVLSVA           | PKA            | 1.2                      | 0.26807      |            | Yes                    |
| 276  | IPI00123709 | A-kinase anchor protei   | Akap1;Gag12;Ssecks;A  | S584  | 1           | 17            | GPSEAPQEAEEAGATS   | GPSEAPQEAEEAGAT(0      | _GPSEAPQEAEEAGAT             | CK2            | 0.9                      | 0.1082       |            | Yes                    |
| 1391 | IPI00123709 | A-kinase anchor protei   | Akap12;Gag12;Ssecks;A | T583  | 1           | 16            | GPSEAPQEAEEAGATS   | GP(0.002)EAPQEAEE      | GPSEAPQEAEEAGAT              | (ph)SDGEKKR    |                          |              |            | No                     |
| 88   | IPI00649060 | A kinase (PRKA) anchor   | Akap2;Palm2;RP23-33   | S984  | 1           | 3             | TLSMIEEIR          | T(0.087)LS(0.913)MIEE  | TL(ph)MIEEIR                 | CAMK2          | 1.9                      | 0.0005411    | Up         | Yes                    |
| 68   | IPI00649060 | A kinase (PRKA) anchor   | Akap2;Palm2;RP23-33   | T982  | 1           | 1             | TLSMIEEIR          | T(0.561)LS(0.439)MIEE  | T(ph)LSMIEEIR                |                | 2.2                      | 3.454E-05    | Up         | No                     |
| 633  | IPI00321739 | A-kinase anchor protei   | Akap8;Akap95          | S320  | 2           | 3             | ADSDGDLSENDGAGDI   | ADS(1)DGDL(1)ENDDC     | ADS(ph)DGDL(ph)EN            | CHK1/2         | 1.2                      | 0.31756      |            | Yes                    |
| 634  | IPI00321739 | A-kinase anchor protei   | Akap8;Akap95          | S325  | 2           | 8             | ADSDGDLSENDGAGDI   | ADS(1)DGDL(1)ENDDC     | ADS(ph)DGDL(ph)EN            | DDGAGDLR       | 1.2                      | 0.31756      |            | Yes                    |
| 65   | IPI00857073 | Proline-rich AKT1 subst  | Akt1s1;Pras           | S255  | 1           | 14            | SLPVSVPVWAFK       | S(1)LPVSVPVWAFK        | S(ph)LPVSVPVWAFK             | GSK3           | 2.2                      | 1.792E-05    | Up         | Yes                    |
| 1392 | IPI00453512 | Alkylated DNA repair p   | Alkbh5;Abh5;Ofoxd     | S384  | 1           | 1             | KSYESSEDCEPAASSPTR | KSYESSEDCEPAAS(0.47    | _KSYESSEDCEPAAS(ph)S         | PTR            |                          |              |            | No                     |
| 1393 | IPI00453512 | Alkylated DNA repair p   | Alkbh5;Abh5;Ofoxd     | S385  | 1           | 15            | KSYESSEDCEPAASSPTR | KSYESSEDCEPAAS(0.47    | _KSYESSEDCEPAAS(ph)          | Polo box       |                          |              |            | No                     |
| 448  | IPI00309844 | Alsin;Amyotrophic late   | Als2                  | S1456 | 1           | 1             | SESPPEGYVVTSSGLL   | S(0.58)ES(0.412)PEPGY  | S(ph)ESPEPGYVVTSSG           | CK1            | 1.2                      | 0.23334      |            | No                     |
| 694  | IPI00223838 | Ankyrin repeat domain    | Ankrd57               | S82   | 1           | 6             | FCTGDSPPLEAK       | FCTGDS(1)PPLEAK        | FCTGDS(ph)PPLEAK             |                | 1.2                      | 0.3481       |            | Yes                    |
| 828  | IPI00831258 | Acidic leucine-rich nucl | Anp32b;Pal31          | T265  | 1           | 4             | KRETDDDEGEDD       | KRET(1)DDEGEDD         | KRET(ph)DDEGEDD              | PKA            | 1.1                      | 0.40441      |            | Yes                    |
| 161  | IPI00648295 | Amine oxidase (Flavin d  | Aof2;RP23-426N4.2-00  | S132  | 2           | 10            | EMDESLANLSEDEYSEE  | EMDESLANLS(0.993)ED    | EM(ox)DESLANLS(ph)           | CK2            | 0.8                      | 0.029713     | Down       | Yes                    |
| 162  | IPI00648295 | Amine oxidase (Flavin d  | Aof2;RP23-426N4.2-00  | S138  | 2           | 16            | EMDESLANLSEDEYSEE  | EMDESLANLS(0.993)ED    | EM(ox)DESLANLS(ph)           | CK2            | 0.8                      | 0.029713     | Down       | Yes                    |
| 879  | IPI00130444 | AP-3 complex subunit c   | Ap3b1                 | S276  | 1           | 5             | NFYEEEEEEKEK       | NFY(0.001)ES(0.999)E   | NFY(1)EEEEEEKEK              | CK2            | 1.1                      | 0.42911      |            | Yes                    |
| 736  | IPI00117811 | AP-3 complex subunit c   | Ap3d1;Ap3d            | S754  | 1           | 3             | RHSSLPTESDEDIAPAQR | RHS(0.613)S(0.229)LPT  | RHS(ph)SLPTESDEDIA           | PKA            | 1.2                      | 0.36612      |            | No                     |
| 1397 | IPI00117811 | AP-3 complex subunit c   | Ap3d1;Ap3d            | S755  | 1           | 4             | RHSSLPTESDEDIAPAQR | RHS(0.081)S(0.306)LPT  | RHS(ph)SLPTESDEDIA           | PIM1/2         |                          |              |            | No                     |
| 540  | IPI00117811 | AP-3 complex subunit c   | Ap3d1;Ap3d            | S760  | 1           | 8             | RHSSLPTESDEDIAPAQR | HSSLPTES(1)DEDIAPAQR   | HSSLPTES(ph)DEDIAPAQR        |                | 1.0                      | 0.27118      |            | Yes                    |
| 1031 | IPI00117811 | AP-3 complex subunit c   | Ap3d1;Ap3d            | S784  | 1           | 15            | VDIITEEMPENALPSDED | VDIITEEMPENALPS(0.9    | _VDIITEEMPENALPS(ph)         | DEDDKDPNDP     | 1.1                      | 0.48893      |            | Yes                    |
| 1399 | IPI00117811 | AP-3 complex subunit c   | Ap3d1;Ap3d            | T758  | 1           | 6             | HSSLPTESDEDIAPAQR  | HS(0.003)S(0.003)LPT   | (ca)HSSLPT(ph)SEDED          | FHA1 Rad53p    |                          |              |            | No                     |
| 983  | IPI00117811 | AP-3 complex subunit c   | Ap3d1;Ap3d            | Y795  | 1           | 26            | VDIITEEMPENALPSDED | VDIITEEMPENALPS(0.5    | _VDIITEEMPENALPS(ph)         | ALK            | 1.1                      | 0.46816      |            | No                     |
| 472  | IPI00170307 | Apolipoprotein A-I-bind  | Apoa1bp;Aibp          | S43   | 1           | 3             | RGSEPMAGAAVK       | RGS(1)ETMAGAAVK        | RGS(ph)ETMAGAAVK             | PKA/AKT        | 1.2                      | 0.24424      |            | Yes                    |
| 147  | IPI00625950 | Adenine phosphoribos     | Aprt;aprt             | S15   | 1           | 1             | SFPDFPIPVGLFR      | S(1)FPDFPIPVGLFR       | S(ph)FPDFPIPVGLFR            | CAMK2          | 0.8                      | 0.017005     | Down       | Yes                    |
| 166  | IPI00123183 | Aquaporin-1;Aquaporin    | Aqp1                  | S262  | 1           | 19            | VWTSQGVVEYDLADDI   | VWTSQGVVEYDLADDI       | VWTSQGVVEYDLADDI             | CK2            | 0.8                      | 0.032489     | Down       | Yes                    |
| 146  | IPI00123183 | Aquaporin-1;Aquaporin    | Aqp1                  | T246  | 1           | 3             | VWTSQGVVEYDLADDI   | VWT(0.544)S(0.177)G    | VWT(ph)SQGVVEYDLADD          | INSRVM(ox)JKPK | 0.8                      | 0.016653     | Down       | No                     |
| 122  | IPI00109656 | ADP-ribosylation factor  | Arfgap2;Zfp289;Znf289 | S145  | 1           | 17            | HGTDLWIDSMNSAPSH   | HGTDLWIDSMNSAPS(0      | _HGTDLWIDSMNSAPSH            | CDK2           | 1.7                      | 0.0068805    | Up         | Yes                    |
| 464  | IPI00111931 | ADP-ribosylation factor  | Arfgap3               | S332  | 1           | 18            | SGISHSVTSDMQTIEQES | SGISHSVTSDMQT(0.00     | _SGISHSVTSDMQTIEQES          | (ph)PTLAKPR    | 1.2                      | 0.24109      |            | Yes                    |
| 1112 | IPI00137087 | ADP-ribosylation factor  | Arfgaf2;RP23-216D20   | S218  | 1           | 12            | ELEKPMQSKPQSPVIAQT | ELEKPMQ(0.05)KQPS(     | ELEKPMQSKPQSPVIA             | WW GroupIV     |                          |              |            | No                     |
| 1115 | IPI00137087 | ADP-ribosylation factor  | Arfgaf2;RP23-216D20   | S227  | 1           | 12            | ELEKPMQSKPQSPVIAQT | ELEKPMQSKPQ(0.002      | ELEKPMQSKPQSPVIA             | CDK1           |                          |              |            | No                     |
| 1120 | IPI00137087 | ADP-ribosylation factor  | Arfgaf2;RP23-216D20   | T224  | 1           | 21            | ELEKPMQSKPQSPVIAQT | ELEKPMQSKPQ(0.002      | ELEKPMQSKPQSPVIA             | FHA KAPP       |                          |              |            | No                     |
| 644  | IPI00652831 | Arginine and glutamate   | Arglu1;Arglu1         | S74   | 1           | 2             | ASSPPDRIDIFGR      | AS(0.5)S(0.5)PPDRIDIF  | AS(ph)SPPDRIDIFGR            | PKA            | 1.2                      | 0.32551      |            | No                     |
| 597  | IPI00652831 | Arginine and glutamate   | Arglu1;Arglu1         | S75   | 1           | 3             | ASSPPDRIDIFGR      | AS(0.113)S(0.887)PDR   | ASS(ph)PPDRIDIFGR            | PKA/AKT        | 1.2                      | 0.30003      |            | Yes                    |

| No   | IPI Numbers | Protein Names            | Gene Names              | pAA   | Number of P | Position in p | Peptide Sequence    | Phospho (STY) Probabi  | Modified Sequence         | Best Motif         | Ratio <sup>1</sup> of Phd | Ratio Signifid | Up-/Down-r | Localized phosphosite? |
|------|-------------|--------------------------|-------------------------|-------|-------------|---------------|---------------------|------------------------|---------------------------|--------------------|---------------------------|----------------|------------|------------------------|
| 376  | IPI00322312 | Rho GDP-dissociation     | Arhgdia;C87222;Gdi1     | T7    | 1           | 6             | AEQEPTAEQLAQIAAEN   | AEQEPT(1)AEQLAQIAA     | AEQEPT(ph)AEQLAQIAA       | AEENEDEHSVNYKPPAQ  | 0.9                       | 0.18516        |            | Yes                    |
| 1044 | IPI00310764 | Rho guanine nucleotide   | Arhgef2;Kiaa0651;Lbc1   | S585  | 1           | 1             | SLPAGDALYLSFNPPQPS  | S(0.997)LPAGDALY(0.00  | S(ph)LPAGDALYLSFNPP       | AURORA-A           | 1.1                       | 0.49328        |            | Yes                    |
| 1307 | IPI00230704 | Rho guanine nucleotide   | Arhgef7;Kiaa0142;Pak3   | S578  | 1           | 21            | VTSVSNPTIKPHSVPSHTI | VTSVSNPTIKPHS(0.001)   | VTSVSNPTIKPHSVPSHTDLS     | (ph)KSPK           | 1.1                       |                | No         |                        |
| 1309 | IPI00230704 | Rho guanine nucleotide   | Arhgef7;Kiaa0142;Pak3   | S580  | 1           | 23            | VTSVSNPTIKPHSVPSHTI | VTSVSNPTIKPHS(0.001)   | VTSVSNPTIKPHSVPSHTDLS     | CDK1               | 1.1                       |                | No         |                        |
| 913  | IPI00230704 | Rho guanine nucleotide   | Arhgef7;Kiaa0142;Pak3   | S497  | 1           | 2             | MSGFYQGGK           | MS(1)GFYQGGK           | M(ox)S(ph)GFYQGGK         | _PKA               | 1.1                       | 0.44449        |            | Yes                    |
| 773  | IPI00757909 | Armadillo repeat-conta   | Armc10                  | S43   | 1           | 1             | SAEDLTGSGYDDILNAEQ  | S(1)AEDLTGSGYDDILNAEQ  | S(ph)AEDLTGSGYDDILNAEQ    | LK                 | 1.2                       | 0.37962        |            | Yes                    |
| 234  | IPI00918646 | cAMP-regulated phosph    | Arpp19;Arpp19;Ensa;E    | S95   | 1           | 4             | YFDSGDYNNMAK        | YFDS(1)GDYNNMAK        | YFDS(ph)GDYNNMAK          | (ox)AK             | 0.9                       | 0.080352       |            | Yes                    |
| 184  | IPI00127472 | Armadillo repeat prote   | Arvcf;Arvcf;Arvcf;Arvcf | T637  | 1           | 4             | NFDT1LIDLPK         | NFDT(1)LIDLPK          | NFDT(ph)LIDLPK            | FHA2 Rad53p        | 0.8                       | 0.044151       | Down       | Yes                    |
| 766  | IPI00556827 | Putative uncharacterize  | Atp2b1                  | S1155 | 1           | 4             | IEDSEPHIPLIDDDTAEDD | IEDS(0.97)EPIHLIDDDT   | IEDS(ph)EPIHLIDDDTDAEDD   | DAPTKR             | 1.2                       | 0.3771         |            | Yes                    |
| 235  | IPI00857253 | Alpha thalassemia/mer    | Atrx;RP23-170G19.5-0    | S92   | 1           | 4             | YVESDDEKPTDENVNEK   | Y(0.165)VES(0.834)DDE  | (ca)YVES(ph)DDEKPTDCK2    |                    | 1.4                       | 0.080726       |            | Yes                    |
| 621  | IPI00857253 | Alpha thalassemia/mer    | Atrx;RP23-170G19.5-0    | Y89   | 1           | 1             | YVESDDEKPTDENVNEK   | Y(0.962)VES(0.038)DDE  | Y(ph)VESDDEKPTDENVNEK     |                    | 1.2                       | 0.31092        |            | Yes                    |
| 705  | IPI00605902 | Ataxin-1-like;Brother o  | Atxn1;Boat              | T328  | 1           | 11            | VEVAAPAHRGTPDPTDLE  | VEVAAPAHRG(0.999)H     | VEVAAPAHRG(ph)PD          | PKA                | 1.2                       | 0.35365        |            | Yes                    |
| 789  | IPI00458001 | Ataxin-2-like protein;A  | Atxn2;A2lp;Atxn2;A2l    | S109  | 1           | 5             | GPPQSPVFEVGVYNNRS   | GPPQS(0.999)PVFEVGV    | GPPQS(ph)PVFEVGVYNN       | WW GroupIV         | 1.0                       | 0.38607        |            | Yes                    |
| 238  | IPI00387388 | BCL2-associated athan    | Bag3;Bag3;Bis;MNCb-2    | S177  | 1           | 1             | SQSPAASDCSSSSSSASL  | S(0.61)QS(0.39)PAAASD  | S(ph)QSPAASDCSSSSSSASL    | PSGR               | 0.9                       | 0.082893       |            | No                     |
| 1278 | IPI00222731 | Brain-specific angiogen  | Baiap2;Baiap2;Baiap2;   | S365  | 1           | 1             | SSSMAAGLER          | S(0.448)S(0.276)S(0.27 | S(ph)SSSMAAGLER           | NEK6               |                           |                | No         |                        |
| 1284 | IPI00222731 | Brain-specific angiogen  | Baiap2;Baiap2;Baiap2;   | S366  | 1           | 2             | SSSMAAGLER          | S(0.193)S(0.404)S(0.40 | SS(ph)SM(ox)AAGLER        | PKA                |                           |                | No         |                        |
| 159  | IPI00222731 | Brain-specific angiogen  | Baiap2;Baiap2;Baiap2;   | S367  | 1           | 3             | SSSMAAGLER          | S(0.097)S(0.054)S(0.84 | SSS(ph)MAAGLER            | _CHK1/2            | 0.8                       | 0.028214       | Down       | Yes                    |
| 882  | IPI00129519 | Brain acid soluble prote | Basp1;Nap22             | T36   | 1           | 12            | KAEGAGTEEEGTKEPESE  | KAEGAGT(0.004)EEEGT    | KAEGAGTEEEGT(ph)P         | CDK1               | 1.1                       | 0.42972        |            | Yes                    |
| 176  | IPI00380722 | Large proline-rich prote | Bat2                    | S761  | 1           | 5             | ERSDSSGSSSEPFER     | ERS(0.017)DS(0.818)GC  | ERSDS(ph)GSSSEPFER        | F box bTrCP        | 1.5                       | 0.040394       | Up         | Yes                    |
| 889  | IPI00380722 | Large proline-rich prote | Bat2                    | T608  | 1           | 13            | EGPEPPEEVPPPTTPPAP  | EGPEPPEEVPPPT(0.5)T    | EGPEPPEEVPPPT(ph)T        | PPAP               | 1.1                       | 0.43249        |            | No                     |
| 660  | IPI00380722 | Large proline-rich prote | Bat2                    | T609  | 1           | 14            | EGPEPPEEVPPPTTPPAP  | EGPEPPEEVPPPT(0.017    | EGPEPPEEVPPPT(ph)T        | WW GroupIV         | 1.0                       | 0.33403        |            | Yes                    |
| 868  | IPI00130381 | Large proline-rich prote | Bat3;Bat3               | S995  | 1           | 4             | ENASAPAGTTAEAEAMSR  | ENAS(0.999)PAGTTAE     | ENAS(ph)PAGTTAEAEAM       | (ox)SR             | 1.1                       | 0.42282        |            | Yes                    |
| 885  | IPI00923656 | Tyrosine-protein kinase  | Baz1b;Wbscr9;Wstf;Ba    | S1464 | 1           | 8             | LADDEGDSDESVEGQSR   | LADDEGDS(1)DESVEGQ     | LADDEGDS(ph)DESVEGQ       | CK2                | 1.1                       | 0.43123        |            | Yes                    |
| 492  | IPI00923656 | Tyrosine-protein kinase  | Baz1b;Wbscr9;Wstf;Ba    | S1468 | 2           | 12            | LADDEGDSDESVEGQSR   | LADDEGDS(0.691)DS(0.   | LADDEGDS(ph)DESVEGQ       | GSK3               | 1.2                       | 0.2534         |            | No                     |
| 601  | IPI00625898 | HMG box transcription    | Bbx;Hbp2;Bbx;Hbp2;B     | S811  | 1           | 7             | TADGRVSPAGGLDLDK    | T(0.004)ADGRVS(0.82)   | TADGRVS(ph)PAGGLT         | PKA                | 1.2                       | 0.30226        |            | Yes                    |
| 512  | IPI00742368 | Novel protein (BC0056    | BC005624;RP23-2210      | S261  | 1           | 12            | VGDTEKPEPERSPPNR    | VGDTEKPEPERS(1)PPNR    | VGDTEKPEPERS(ph)PPNR      |                    | 1.2                       | 0.26197        |            | Yes                    |
| 5    | IPI00330070 | cDNA sequence BC0894     | BC089491                | S225  | 2           | 9             | LSTISPAPFSFGSTK     | LSTIS(0.002)PAPFS(0.99 | LSTISPAPFS(ph)FGS         | (ph)CK1            | 0.03                      | 7.97E-105      | Down       | Yes                    |
| 6    | IPI00330070 | cDNA sequence BC0894     | BC089491                | S228  | 2           | 12            | LSTISPAPFSFGSTK     | LSTIS(0.002)PAPFS(0.99 | LSTISPAPFS(ph)FGS         | (ph)CK2            | 0.03                      | 7.97E-105      | Down       | No                     |
| 7    | IPI00330070 | cDNA sequence BC0894     | BC089491                | T229  | 2           | 13            | LSTISPAPFSFGSTK     | LSTIS(0.002)PAPFS(0.99 | LSTISPAPFS(ph)FGS         | (ph)FHA2 Rad53p    | 0.03                      | 7.97E-105      | Down       | No                     |
| 589  | IPI00331555 | 2-oxoisovalerate dehyd   | Bckdha                  | S338  | 1           | 5             | IGHHSTSDSSAYR       | IGHHS(0.991)T(0.008)S  | IGHHS(ph)TSDSSAYR         |                    | 1.0                       | 0.29372        |            | Yes                    |
| 545  | IPI00331555 | 2-oxoisovalerate dehyd   | Bckdha                  | S348  | 1           | 1             | SVDEVNYYWQDKQDHP    | S(1)VDEVNYYWQDKQDHP    | S(ph)VDEVNYYWQDKQD        | CK2                | 1.0                       | 0.27408        |            | Yes                    |
| 1406 | IPI00115094 | [3-methyl-2-oxobutano    | Bckdk                   | S31   | 1           | 1             | STATDTHHVELAR       | S(0.429)T(0.271)S(0.27 | S(ph)STATDTHHVELAR        | CAMK2              |                           |                | No         |                        |
| 415  | IPI00321499 | Bcl-2-like protein 13;P  | Bcl2l13;Mii1;Bcl2l13    | S343  | 1           | 5             | AEKTSPTPSVFLVEEEL   | AEKT(0.027)S(0.707)PT  | AEKTS(ph)PTPSVFLVEL       | GSK3               | 1.3                       | 0.21601        |            | No                     |
| 1250 | IPI00321499 | Bcl-2-like protein 13;P  | Bcl2l13;Mii1;Bcl2l13    | T342  | 1           | 4             | AEKTSPTPSVFLVEEEL   | AEKT(0.305)S(0.305)PT  | AEKTS(ph)PTPSVFLVEEEL     | AVTARPEAVER        |                           |                | No         |                        |
| 1254 | IPI00321499 | Bcl-2-like protein 13;P  | Bcl2l13;Mii1;Bcl2l13    | T345  | 1           | 7             | AEKTSPTPSVFLVEEEL   | AEKT(0.305)S(0.305)PT  | AEKTS(ph)PTPSVFLVEEEL     | AVTARPEAVER        |                           |                | No         |                        |
| 896  | IPI00321499 | Bcl-2-like protein 13;P  | Bcl2l13;Mii1;Bcl2l13    | T361  | 1           | 23            | AEKTSPTPSVFLVEEEL   | AEKT(0.024)S(0.024)PT  | AEKTSPTPSVFLVEEEL         | AVTARPEAVER        | 1.1                       | 0.4371         |            | Yes                    |
| 416  | IPI00453751 | B-cell CLL/lymphoma 9    | Bcl9l;B9l;Bcl9l;B9l     | S116  | 1           | 1             | SVSVDSEGEQR         | S(0.665)VS(0.335)VDSE  | S(ph)SVSVDSEGEQR          | CAMK2              | 2.8                       | 3.05E-08       | Up         | No                     |
| 59   | IPI00453751 | B-cell CLL/lymphoma 9    | Bcl9l;B9l;Bcl9l;B9l     | S118  | 1           | 3             | SVSVDSEGEQR         | S(0.156)VS(0.821)VDSE  | SVS(ph)VDSEGEQR           | PKA/AKT            | 2.4                       | 3.154E-06      | Up         | Yes                    |
| 790  | IPI00415385 | Bcl-2-associated transc  | Bclaf1;Btf;Kiaa0164;B   | S177  | 1           | 10            | KAEGEPQEEESPLK      | KAEGEPQEEES(1)PLK      | KAEGEPQEEES(ph)PLK        | CDK2               | 1.1                       | 0.38646        |            | Yes                    |
| 1239 | IPI00415385 | Bcl-2-associated transc  | Bclaf1;Btf;Kiaa0164;B   | S261  | 1           | 7             | NTPSQHSHSIQHSPE     | NT(0.172)PS(0.156)QHS  | NTPSQHSHSIQHSI            | CK1                |                           |                | No         |                        |
| 639  | IPI00415385 | Bcl-2-associated transc  | Bclaf1;Btf;Kiaa0164;B   | S263  | 1           | 9             | NTPSQHSHSIQHSPE     | NT(0.005)PS(0.01)QHS   | NTPSQHSHSIQHSI            | GSK3               | 1.2                       | 0.32327        |            | No                     |
| 663  | IPI00415385 | Bcl-2-associated transc  | Bclaf1;Btf;Kiaa0164;B   | S267  | 1           | 13            | NTPSQHSHSIQHSPE     | NTPSQHS(0.001)HS(0.0   | NTPSQHSHSIQHSI            | (ph)CDK2           | 1.0                       | 0.33583        |            | Yes                    |
| 281  | IPI00415385 | Bcl-2-associated transc  | Bclaf1;Btf;Kiaa0164;B   | S383  | 1           | 17            | GRADGDWDDQEVLDYF    | GRADGDWDDQEVLDY(0.6    | GRADGDWDDQEVLDY           | CK2                | 1.3                       | 0.11201        |            | Yes                    |
| 1236 | IPI00415385 | Bcl-2-associated transc  | Bclaf1;Btf;Kiaa0164;B   | S387  | 1           | 19            | ADGDWDDQEVLDYFSD    | ADGDWDDQEVLDY(0.0      | ADGDWDDQEVLDYFSD          | CK1                |                           |                | No         |                        |
| 880  | IPI00415385 | Bcl-2-associated transc  | Bclaf1;Btf;Kiaa0164;B   | S395  | 1           | 4             | FHDSEGDTEETEDYR     | FHDS(1)EGDTEETEDYR     | FHDS(ph)EGDTEETEDYR       |                    | 1.1                       | 0.42925        |            | Yes                    |
| 628  | IPI00415385 | Bcl-2-associated transc  | Bclaf1;Btf;Kiaa0164;B   | S494  | 1           | 5             | KEVQSPQEVK          | KEVQS(1)PEQVK          | KEVQS(ph)PEQVK            | ERK/MAPK           | 1.2                       | 0.31548        |            | Yes                    |
| 433  | IPI00415385 | Bcl-2-associated transc  | Bclaf1;Btf;Kiaa0164;B   | S510  | 1           | 8             | LKELFDYSPPLHK       | LKELFDYS(1)PPLHK       | LKELFDYS(ph)PPLHK         |                    | 1.2                       | 0.22732        |            | Yes                    |
| 706  | IPI00415385 | Bcl-2-associated transc  | Bclaf1;Btf;Kiaa0164;B   | S656  | 1           | 5             | RIDISPSALR          | RIDIS(1)PSALR          | RIDIS(ph)PSALR            |                    | 1.2                       | 0.35374        |            | Yes                    |
| 1027 | IPI00415385 | Bcl-2-associated transc  | Bclaf1;Btf;Kiaa0164;B   | S658  | 1           | 6             | IDISPSALR           | IDIS(0.242)PS(0.758)AL | (ca)IDISPS(ph)ALR         |                    | 1.1                       | 0.48724        |            | No                     |
| 996  | IPI00415385 | Bcl-2-associated transc  | Bclaf1;Btf;Kiaa0164;B   | Y381  | 1           | 13            | ADGDWDDQEVLDYFSD    | ADGDWDDQEVLDY(0.6      | ADGDWDDQEVLDY(ph)FSDKESAK |                    | 1.1                       | 0.47532        |            | No                     |
| 701  | IPI00415385 | Bcl-2-associated transc  | Bclaf1;Btf;Kiaa0164;B   | Y509  | 1           | 5             | ELFDYSPPLHK         | ELFDY(0.5)S(0.5)PPLHK  | (ca)ELFDY(ph)PPLHK        |                    | 1.0                       | 0.35028        |            | No                     |
| 389  | IPI00114352 | Myc box-dependent-in     | Bin1;Amphl;Sh3p9;Bin    | S296  | 1           | 1             | SPSPPPDGSAAATPEIR   | S(0.938)PS(0.062)PPDP  | S(ph)SPSPPPDGSAAATPEIR    |                    | 0.9                       | 0.19761        |            | Yes                    |
| 811  | IPI00114352 | Myc box-dependent-in     | Bin1;Amphl;Sh3p9;Bin    | S298  | 1           | 16            | AQPSDNAMEKGNKSPS    | AQPS(0.006)DNAMEKGN    | AQPSDNAMEKGNKSPS          | (ph)PPPDGSPAATPEIR | 1.1                       | 0.39683        |            | Yes                    |
| 195  | IPI00114352 | Myc box-dependent-in     | Bin1;Amphl;Sh3p9;Bin    | S304  | 1           | 9             | SPSPPPDGSAAATPEIR   | S(0.001)PS(0.002)PPDP  | SPSPPPDGS(ph)PAAATPEIR    |                    | 0.8                       | 0.05335        |            | Yes                    |
| 1226 | IPI00114352 | Myc box-dependent-in     | Bin1;Amphl;Sh3p9;Bin    | T308  | 1           | 13            | SPSPPPDGSAAATPEIR   | S(0.228)PS(0.257)PPDP  | (ca)SPS(ph)PPPDGSPA       | FHA2 Rad53p        |                           |                | No         |                        |
| 1184 | IPI00850963 | BCL2/adenovirus E1B 1    | Bnip3l;Nix;Bnip3l;mcG   | S118  | 1           | 4             | DHSSQSEEEVVEGK      | DHS(0.029)S(0.486)QS   | DHSS(ph)QSEEEVVEGK        | CK2                |                           |                | No         |                        |
| 1187 | IPI00850963 | BCL2/adenovirus E1B 1    | Bnip3l;Nix;Bnip3l;mcG   | S120  | 1           | 6             | DHSSQSEEEVVEGK      | DHS(0.029)S(0.486)QS   | DHSS(ph)QSEEEVVEGK        | CK2                |                           |                | No         |                        |
| 268  | IPI00410792 | Bromodomain-containi     | Brd3;Fsr2;Brd3;Fsr2;    | S262  | 1           | 3             | SESPPLSEPK          | S(0.029)ES(0.971)PPLS  | SES(ph)PPLSEPK            | 14-3-3 binding     | 0.9                       | 0.10612        |            | Yes                    |
| 251  | IPI00153284 | BUD13 homolog;BUD1       | Bud13;Bud13             | S297  | 1           | 5             | AHHESPDLELHK        | AHHES(1)PDLELHK        | AHHES(ph)PDLELHK          |                    | 1.4                       | 0.094306       |            | Yes                    |
| 987  | IPI00118762 | Bystin                   | Bysl                    | S97   | 1           | 10            | LGGLPQDGSDEEDEF     | LGGLPQDGS(1)DEEDEF     | LGGLPQDGS(ph)DEEDEF       | CK2                | 1.1                       | 0.46989        |            | Yes                    |
| 683  | IPI00828741 | HnRNP-associated with    | C130057N11Rik;Raly;R    | S270  | 1           | 10            | LPAPQEDTASEAGTPQG   | LPAPQEDT(0.007)AS(0.   | LPAPQEDTAS(ph)EAGTPQ      | GEVQTR             | 1.2                       | 0.34386        |            | Yes                    |
| 929  | IPI00828741 | HnRNP-associated with    | C130057N11Rik;Raly;R    | T268  | 1           | 8             | LPAPQEDTASEAGTPQG   | LPAPQEDT(0.946)AS(0.   | LPAPQEDT(ph)ASEAGT        | CK2                | 1.1                       | 0.44882        |            | Yes                    |
| 480  | IPI00828741 | HnRNP-associated with    | C130057N11Rik;Raly;R    | T274  | 2           | 14            | LPAPQEDTASEAGTPQG   | LPAPQEDT(0.212)AS(0.   | LPAPQEDTAS(ph)EAGT        | (ph)PQGEVQTR       | 1.2                       | 0.24771        |            | Yes                    |
| 535  | IPI00828741 | HnRNP-associated with    | C130057N11Rik;Raly;R    | S1335 | 1           | 4             | GRLSVPVPR           | GRLS(1)PVPVPR          | GRLS(ph)PVPVPR            | PKA                | 1.2                       | 0.26993        |            | Yes                    |
| 90   | IPI00380280 | Carbamoyl-phosphate      | Cad;mcG 23490;Cad       | S1859 | 1           | 5             | IHRASDPGLPAEPEK     | IHRAS(1)DPGLPAEPEK     | IHRAS(ph)DPGLPAEPEK       | PKA                | 1.9                       | 0.0006648      | Up         | Yes                    |
| 640  | IPI00775950 | Putative uncharacterize  | Cald1                   | S254  | 1           | 9             | LKQTFNAFSPSR        | LKQT(0.001)ENAFS(0.9   | LKQTFNAFSPS(ph)PSR        | CDK2               | 1.2                       | 0.32369        |            | Yes                    |

| No   | IPI Numbers | Protein Names              | Gene Names              | pAA   | Number of P | Position in p | Peptide Sequence    | Phospho (STY) Probabi      | Modified Sequence     | Best Motif  | Ratio <sup>1</sup> of Phd | Ratio Signif | Up-/Down-r | Localized phosphosite? |
|------|-------------|----------------------------|-------------------------|-------|-------------|---------------|---------------------|----------------------------|-----------------------|-------------|---------------------------|--------------|------------|------------------------|
| 140  | IPI00406790 | Calcium/calmodulin-de      | Camk2d;Kiaa4163;Cam     | T371  | 1           | 9             | ESTESSNTTIEDVDK     | ES(0.013)T(0.013)ES(0.013) | ESTESSNTT(ph)IIEDEDV  | FHA1 Rad53p | 0.8                       | 0.014907     | Down       | Yes                    |
| 609  | IPI00119618 | Calnexin                   | Canx                    | S553  | 1           | 3             | QKSDAEEDGVTGSQDEE   | QKS(0.999)DAEEDGVT         | QKS(ph)DAEEDGVTGS     | CK2         | 1.2                       | 0.30554      |            | Yes                    |
| 698  | IPI00119618 | Calnexin                   | Canx                    | S563  | 1           | 11            | SDAEEDGVTGSQDEE     | SDAEEDGVT(0.096)GS         | SDAEEDGVTGS(ph)QD     | CK2         | 1.2                       | 0.34914      |            | Yes                    |
| 826  | IPI00119618 | Calnexin                   | Canx                    | S582  | 1           | 10            | AEDEILNRSR          | AEDEILNRS(1)PR             | AEDEILNRS(ph)PR       | CDK1        | 1.1                       | 0.40275      |            | Yes                    |
| 515  | IPI00133349 | Calcium-regulated heat     | Carhsp1                 | S42   | 1           | 6             | GNVVPSPLPTRR        | GNVVPS(1)PLPTRR            | GNVVPS(ph)PLPTRR      | ERK/MAPK    | 1.0                       | 0.26322      |            | Yes                    |
| 354  | IPI00133349 | Calcium-regulated heat     | Carhsp1                 | S53   | 1           | 3             | TFSATVR             | TFS(1)ATVR                 | TFS(ph)ATVR           | PKA/AKT     | 1.3                       | 0.17121      |            | Yes                    |
| 414  | IPI00133349 | Calcium-regulated heat     | Carhsp1                 | T46   | 1           | 10            | GNVVPSPLPTR         | GNVVPS(0.5)PLPT(0.5)P      | (ca)GNVVPS(ph)PLPTR   |             | 1.0                       | 0.21559      |            | No                     |
| 308  | IPI00776341 | Peripheral plasma mem      | Cask                    | S569  | 1           | 3             | TQSSCEDLPSTTQPK     | T(0.152)QS(0.628)S(0.1)    | TQS(ph)SSCEDLPSTTQ    | PKA/AKT     | 0.9                       | 0.13415      |            | No                     |
| 1359 | IPI00776341 | Peripheral plasma mem      | Cask                    | S570  | 1           | 4             | TQSSCEDLPSTTQPK     | T(0.004)QS(0.031)S(0.4)    | TQSS(ph)SSCEDLPSTTQ   | CK2         | 1.0                       | 0.25016      |            | No                     |
| 486  | IPI00776341 | Peripheral plasma mem      | Cask                    | S571  | 1           | 5             | TQSSCEDLPSTTQPK     | T(0.001)QS(0.007)S(0.0)    | TQSS(ph)CEDLPSTTQ     | CK1         | 1.0                       | 0.25016      |            | Yes                    |
| 1360 | IPI00776341 | Peripheral plasma mem      | Cask                    | T567  | 1           | 1             | TQSSCEDLPSTTQPK     | T(0.22)QS(0.204)S(0.20)    | T(ph)QSSCEDLPSTTQ     | CK1         |                           |              |            | No                     |
| 187  | IPI00409176 | Calpastatin;Calpain inh    | Cast;Cast;Cast;Cast;Cas | S219  | 1           | 9             | EQKPFPTASPVQSTPSKP  | EQKPFPT(0.009)PAS(0.9)     | EQKPFPTAS(ph)PVQST    | WW GroupIV  | 1.5                       | 0.045872     | Up         | Yes                    |
| 197  | IPI00409176 | Calpastatin;Calpain inh    | Cast;Cast;Cast;Cast;Cas | S226  | 1           | 16            | EQKPFPTASPVQSTPSKP  | EQKPFPT(0.037)PAS(0.2)     | EQKPFPTASPVQSTPS      | CK1         | 1.4                       | 0.05451      |            | No                     |
| 350  | IPI00409176 | Calpastatin;Calpain inh    | Cast;Cast;Cast;Cast;Cas | S442  | 1           | 1             | SLSESELIGLSADDFDR   | S(0.66)LS(0.34)SESELIGE    | S(ph)LSESELIGLSADDF   | CK2         | 0.9                       | 0.16792      |            | No                     |
| 148  | IPI00409176 | Calpastatin;Calpain inh    | Cast;Cast;Cast;Cast;Cas | T479  | 1           | 7             | SNDSQTTPGETVPR      | S(0.002)NDT(0.001)S(0.0)   | SNDSQT(ph)PGETVPR     |             | 0.8                       | 0.017165     | Down       | Yes                    |
| 131  | IPI00117829 | Caveolin-1                 | Cav1;Cav                | Y14   | 1           | 9             | YVYSEGHLYTVPIR      | YVYSEGHLY(0.931)T(0.1)     | YVYSEGHLY(ph)TVPIR    | ABL         | 0.7                       | 0.010847     | Down       | Yes                    |
| 1070 | IPI00677454 | Chromobox homolog 3        | Cbx3;Cbx3               | S176  | 1           | 5             | LTWHSCEPEDEAQ       | LTWHS(1)CPEDEAQ            | LTWHS(ph)CPEDEAQ      | CK2         |                           |              |            | Yes                    |
| 1033 | IPI00677454 | Chromobox homolog 3        | Cbx3;Cbx3               | S93   | 1           | 1             | SLSDESDDSK          | S(0.994)LS(0.006)DSE       | S(ph)SLSDESDDSK       | AURORA-A    | 1.1                       | 0.48941      |            | Yes                    |
| 950  | IPI00677454 | Chromobox homolog 3        | Cbx3;Cbx3               | S95   | 1           | 3             | SLSDESDDSK          | S(0.088)LS(0.912)DSE       | SLS(ph)SLSDESDDSK     | CK2         | 1.1                       | 0.45682      |            | Yes                    |
| 1067 | IPI00677454 | Chromobox homolog 3        | Cbx3;Cbx3               | S97   | 1           | 5             | SLSDESDDSKSK        | S(0.089)LS(0.415)DS(0.0)   | SLS(ph)SLSDESDDSKSK   | NEK6        |                           |              |            | No                     |
| 1263 | IPI00123755 | Chromobox protein ho       | Cbx5;Hp1a               | S92   | 1           | 2             | KSSFNSADDIK         | KS(0.5)S(0.5)FS(0.001)N    | KS(ph)SSFNSADDIK      | PKA         |                           |              |            | No                     |
| 80   | IPI00123755 | Chromobox protein ho       | Cbx5;Hp1a               | S93   | 1           | 3             | KSSFNSADDIK         | KS(0.06)S(0.935)FS(0.0)    | KSS(ph)SSFNSADDIK     | PKA         | 2.0                       | 0.0002769    | Up         | Yes                    |
| 949  | IPI00321848 | Coiled-coil and C2 dom     | Cc2d1a                  | S435  | 1           | 8             | LANHDEGSDDEEETPK    | LANHDEGS(1)DDEEET          | LANHDEGS(ph)DDEE      | CK2         | 1.1                       | 0.45577      |            | Yes                    |
| 322  | IPI00653604 | Coiled-coil domain-con     | Ccdc102a                | S12   | 1           | 4             | LAESPQLSK           | LAES(1)PQLSK               | LAES(ph)PQLSK         | NEK6        | 0.9                       | 0.14416      |            | Yes                    |
| 1297 | IPI00319221 | Coiled-coil domain-con     | Ccdc12                  | S165  | 1           | 21            | GQEDSLASAVDATTGQE   | GQEDSLASAVDATT(0.00)       | GQEDSLASAVDATTGQEA    | CD5(ph)D    |                           |              |            | Yes                    |
| 824  | IPI00133032 | Coiled-coil domain-con     | Ccdc43;D11ErtD707e;C    | T137  | 1           | 11            | AALLAQYADVTDEEAEI   | AALLAQY(0.001)ADVT(0.0)    | AALLAQYADVT(ph)DE     | CK2         | 1.0                       | 0.40166      |            | Yes                    |
| 215  | IPI00402914 | Coiled-coil domain-con     | Ccdc86;Cyclon;D19ErtD   | S18   | 1           | 11            | RLEGLKPLSPENLPPV    | RLEGLKPLS(1)PENLPPV        | RLEGLKPLS(ph)PENLP    | WW GroupIV  | 1.4                       | 0.064616     |            | Yes                    |
| 491  | IPI00170037 | Malcavernin;Cerebral c     | Ccm2;Osm;Ccm2;Osm       | S393  | 1           | 6             | GIITDSFGR           | GIITDS(1)FGR               | GIITDS(ph)FGR         |             | 1.0                       | 0.25269      |            | Yes                    |
| 273  | IPI00654283 | Putative uncharacterize    | Ccnk;Ccnk               | S341  | 1           | 5             | AVVVS1PKKENK        | AVVVS(1)PKKENK             | AVVVS(ph)PKKENK       | ERK/MAPK    | 1.4                       | 0.10743      |            | Yes                    |
| 457  | IPI00336973 | Cyclin-L1;Cyclin Ania-6    | Ccnl1;Ania6a;Ccn1       | S358  | 1           | 5             | AEEKSPVSNVVK        | AEEKS(0.993)PVS(0.007)     | AEEKS(ph)PVSINVK      |             | 1.2                       | 0.23732      |            | Yes                    |
| 450  | IPI00308149 | Cyclin-Y;Cyclin fold pro   | Ccny;Cfp1;Ccny;Cfp1     | S324  | 1           | 1             | SASADNLILPR         | S(0.642)AS(0.358)ADNL      | S(ph)ASADNLILPR       | PKA         | 1.0                       | 0.23399      |            | No                     |
| 517  | IPI00308149 | Cyclin-Y;Cyclin fold pro   | Ccny;Cfp1;Ccny;Cfp1     | S326  | 1           | 3             | SASADNLILPR         | S(0.112)AS(0.888)ADNL      | SAS(ph)ADNLILPR       | PKA/AKT     | 1.0                       | 0.26341      |            | Yes                    |
| 570  | IPI00753875 | Putative uncharacterize    | Ccny1                   | S350  | 1           | 1             | SLSADNFIGIQR        | S(0.663)LS(0.337)ADNF      | S(ph)SLSADNFIGIQR     | NIMA        | 1.0                       | 0.28563      |            | No                     |
| 599  | IPI00753875 | Putative uncharacterize    | Ccny1                   | S352  | 1           | 1             | SLSADNFIGIQR        | S(0.096)LS(0.904)ADNF      | SLS(ph)ADNFIGIQR      | CHK1        | 1.0                       | 0.3008       |            | Yes                    |
| 167  | IPI00268688 | CD2-associated protein     | Cd2ap;Mets1             | S458  | 1           | 3             | SVLDLDAFVAR         | S(1)VDLDAFVAR              | S(ph)VDLDAFVAR        | CAMK2       | 1.5                       | 0.033948     | Up         | Yes                    |
| 700  | IPI00110050 | PITSLRE serine/threoni     | Cdc21i;Cdc21            | S47   | 1           | 3             | RDSLEEGELR          | RDS(1)LEEGELR              | RDS(ph)LEEGELR        | AURORA-A    | 1.0                       | 0.34994      |            | Yes                    |
| 1024 | IPI00464128 | Cell division cycle 2-like | Cdc215;Kiaa1791;Cdc21   | T871  | 1           | 11            | LYSSESRPYTNK        | LYSSESRPY(0.001)T(0.1)     | LYSSESRPY(ph)TNK      | CAMK2       | 1.1                       | 0.48698      |            | Yes                    |
| 764  | IPI00114613 | Serine/threonine-prote     | Cdc42bpb;Kiaa1124       | S1692 | 1           | 15            | HSTPSNNSNPGPPSPNS   | HSTPSNNSNPGPPS(0.5)        | HSTPSNNSNPGPPS(ph)    | WW GroupIV  | 1.0                       | 0.37698      |            | No                     |
| 765  | IPI00114613 | Serine/threonine-prote     | Cdc42bpb;Kiaa1124       | S1695 | 1           | 18            | HSTPSNNSNPGPPSPNS   | HSTPSNNSNPGPPS(0.5)        | HSTPSNNSNPGPPS(ph)    | WW GroupIV  | 1.0                       | 0.37698      |            | No                     |
| 325  | IPI00471127 | Cdc42 effector protein     | Cdc42ep1;Borg5;Cep1     | S207  | 1           | 4             | RSDSLLSFR           | RSDS(1)LLSFR               | RSDS(ph)LLSFR         | CHK1/2      | 0.9                       | 0.14464      |            | Yes                    |
| 778  | IPI00124906 | Cdc42 effector protein     | Cdc42ep4;Borg4;Cep4;    | S64   | 1           | 8             | AREADDESLEQASASK    | AREADDES(1)LEQASA          | AREADDES(ph)LEQA      | PLK         | 1.2                       | 0.38299      |            | Yes                    |
| 1366 | IPI00125505 | Cdc42 GTPase-activatin     | Cdgap;Kiaa1204          | S1092 | 1           | 4             | HRPSSLNLDSATPIADLFR | HRPS(0.49)S(0.49)LNLD      | HRPS(ph)SLNLDSATPI    | PKA         |                           |              |            | No                     |
| 1370 | IPI00125505 | Cdc42 GTPase-activatin     | Cdgap;Kiaa1204          | S1093 | 1           | 5             | HRPSSLNLDSATPIADLFR | HRPS(0.49)S(0.49)LNLD      | HRPS(ph)SLNLDSATPI    | CAMK2       |                           |              |            | No                     |
| 806  | IPI00138190 | Cadherin-11;Osteoblas      | Cdh11;Cad-11            | S714  | 1           | 9             | PGLRPAAPNSVDVDFDIF  | PGLRPAAPNS(1)VDVDFD        | PGLRPAAPNS(ph)VDVDFD  | INTR        | 1.0                       | 0.39453      |            | Yes                    |
| 460  | IPI00138190 | Cadherin-11;Osteoblas      | Cdh11;Cad-11            | S788  | 1           | 7             | LADLYGSKDTFDDDS     | LADLY(0.001)GS(0.991)      | LADLYGS(ph)KDTFDD     | NEK6        | 1.0                       | 0.2391       |            | Yes                    |
| 1311 | IPI00138190 | Cadherin-11;Osteoblas      | Cdh11;Cad-11            | Y786  | 1           | 5             | LADLYGSKDTFDDDS     | LADLY(0.417)GS(0.417)      | LADLY(ph)GSKDTFDD     |             |                           |              |            | No                     |
| 602  | IPI00133537 | Cyclin-dependent kinas     | Cdkn1b;Cdkn1b           | S10   | 1           | 5             | VSNGLPSLER          | VSNGLS(0.94)PS(0.06)LE     | VSNGLS(ph)PSLER       | CK1         | 1.0                       | 0.30306      |            | Yes                    |
| 255  | IPI00353932 | Cerebellar degeneratio     | Cdr2l;Gm21              | S180  | 1           | 4             | LHSSLELGRPRLEQENEF  | LHS(0.136)S(0.728)S(0.0)   | LHSS(ph)SLELGRPRLEC   | CK2         | 0.9                       | 0.098741     |            | No                     |
| 702  | IPI00468999 | Phosphatidate cytidilyl    | Cds2;Cds2;RP23-33N1S    | S32   | 1           | 22            | EDAPPEDKESSEAKLDG   | EDAPPEDKESSEAKLDG          | EDAPPEDKESSEAKLD      | CK2         | 1.2                       | 0.35061      |            | Yes                    |
| 730  | IPI00468999 | Phosphatidate cytidilyl    | Cds2;Cds2;RP23-33N1S    | S34   | 1           | 9             | LDGETASDESER        | LDGET(0.004)AS(0.151)      | LDGETASDS(ph)ESR      | CK1         | 1.0                       | 0.36183      |            | Yes                    |
| 722  | IPI00752710 | CCAAT/enhancer-bindin      | Cebpz;Cb2;Cebpa-rs1     | S629  | 2           | 9             | SQLDDHPESDEENFVDV   | S(0.003)QLDDHPES(0.9)      | SQLDDHPES(ph)DEEN     | CK2         | 1.2                       | 0.35872      |            | Yes                    |
| 723  | IPI00752710 | CCAAT/enhancer-bindin      | Cebpz;Cb2;Cebpa-rs1     | S641  | 2           | 21            | SQLDDHPESDEENFVDV   | S(0.003)QLDDHPES(0.9)      | SQLDDHPES(ph)DEEN     | CK2         | 1.2                       | 0.35872      |            | Yes                    |
| 252  | IPI00667973 | Centrosomal protein of     | Cep170;Kiaa0470         | S1102 | 1           | 1             | LGEASDSELADADK      | LGEAS(0.922)DS(0.078)      | LGEAS(ph)DSELADAD     | CK2         | 1.4                       | 0.095599     |            | Yes                    |
| 397  | IPI00667973 | Centrosomal protein of     | Cep170;Kiaa0470         | S1155 | 1           | 1             | SDSEATISR           | S(0.969)DS(0.031)EATIS     | S(ph)DSEATISR         | CK2         | 0.9                       | 0.20389      |            | Yes                    |
| 897  | IPI00667973 | Centrosomal protein of     | Cep170;Kiaa0470         | S1157 | 1           | 3             | SDSEATISR           | S(0.102)DS(0.898)EATIS     | SDS(ph)EATISR         | CAMK2       | 1.1                       | 0.43846      |            | Yes                    |
| 220  | IPI00222386 | Charged multivesicular     | Chmp2b                  | S199  | 1           | 4             | ATISDEEIER          | AT(0.001)S(0.999)DEE       | ATIS(ph)DEEIER        | CK2         | 0.8                       | 0.067351     |            | Yes                    |
| 1026 | IPI00785520 | CBF1-interacting corep     | Cir;Cir;Cir             | S202  | 1           | 14            | NLTANDPQSDYVASDCE   | NLTANDPQSDYVASDCE          | NLTANDPQSDYVAS(ph)    | CK2         | 1.1                       | 0.48702      |            | Yes                    |
| 110  | IPI00672213 | CLIP-associating protei    | Clasp1;Kiaa0622;Clasp   | S795  | 1           | 5             | VLSTDTLEAAVADALK    | VLST(0.05)T(0.05)S(0.87)   | VLSTS(ph)TDLEAAVAD    | NEK6        | 0.7                       | 0.0002348    | Down       | Yes                    |
| 413  | IPI00672213 | CLIP-associating protei    | Clasp1;Kiaa0622;Clasp   | S600  | 1           | 3             | SRSIDIVNAAASAK      | S(0.097)RS(0.903)DIDV      | SRS(ph)DIDVNAASAK     | CHK1/2      | 1.0                       | 0.21373      |            | Yes                    |
| 775  | IPI00467854 | CAP-Gly domain-conta       | Clip2;Clyn2;Kiaa0291;C  | S924  | 1           | 10            | VLLLEANRHSPPGER     | VLLLEANRHS(1)PGPER         | VLLLEANRHS(ph)PGPE    | PKA         | 1.2                       | 0.38159      |            | Yes                    |
| 440  | IPI00124248 | Chloride channel regul     | Clns1a;Icln             | S100  | 1           | 10            | LGEESKEPLSDEEEDND   | LGEES(0.003)KEPLS(0.9)     | LGEESKEPLS(ph)DEEEDND | VPEIFEFR    | 1.0                       | 0.22986      |            | Yes                    |
| 444  | IPI00915083 | Putative uncharacterize    | Cnot2;Cnot2;Cnot2;Cn    | S175  | 1           | 11            | TNSMSSGLGSPNRR      | TNSMSSGLGS(1)PNRR          | TNSMSSGLGS(ph)PN      | CDK2        | 1.2                       | 0.2312       |            | Yes                    |
| 951  | IPI00277028 | Negative elongation fac    | Cobra1;Nelfb;MNCB-5     | S557  | 1           | 3             | KPSPTQAAETPALDPLP   | KPS(0.5)PT(0.5)QAAETF      | KPS(ph)PTQAAETPAL     | PKA         | 1.1                       | 0.45716      |            | No                     |
| 952  | IPI00277028 | Negative elongation fac    | Cobra1;Nelfb;MNCB-5     | T559  | 1           | 5             | KPSPTQAAETPALDPLP   | KPS(0.5)PT(0.5)QAAETF      | KPS(ph)PTQAAETPAL     | FHA KAPP    | 1.0                       | 0.45716      |            | No                     |
| 1312 | IPI00132076 | Catechol O-methyltran      | Comt;Comt1;Comt;Cor     | S260  | 1           | 8             | AVYQGGPSSPVKS       | AVY(0.306)QGGPS(0.30)      | (ca)AVY(ph)QGGPSSPVKS |             |                           |              |            | No                     |
| 496  | IPI00132076 | Catechol O-methyltran      | Comt;Comt1;Comt;Cor     | S261  | 1           | 9             | AVYQGGPSSPVKS       | AVYQGGPS(0.005)S(0.9)      | AVYQGGPS(ph)PVKS      | Polo box    | 1.0                       | 0.25477      |            | Yes                    |



| No   | IPI Numbers | Protein Names             | Gene Names             | pAA   | Number of P | Position in p | Peptide Sequence    | Phospho (STY) Probabi    | Modified Sequence    | Best Motif        | Ratio <sup>1</sup> of Phd | Ratio Signifid | Up-/Down-r | Localized phosphosite? |
|------|-------------|---------------------------|------------------------|-------|-------------|---------------|---------------------|--------------------------|----------------------|-------------------|---------------------------|----------------|------------|------------------------|
| 1316 | IPI00132076 | Catechol O-methyltran     | Comt;Comt1;Comt;Cor    | S265  | 1           | 13            | AVYQGGSSPVKS        | AVY(0.001)QGGPS(0.08     | (ca)AVYQGGSS(ph)PK1  | CK1               |                           |                | No         | No                     |
| 1319 | IPI00132076 | Catechol O-methyltran     | Comt;Comt1;Comt;Cor    | Y255  | 1           | 3             | AVYQGGSSPVKS        | AVY(0.306)QGGPS(0.30     | (ca)AVY(ph)QGGSSP    | ABL               |                           |                | No         | No                     |
| 942  | IPI00649269 | Cell division cycle 2-rel | Crkrs;Crk7;Kiaa0904;Cr | S1079 | 1           | 16            | KETTSGTAEPRKNNKSPA  | KETTSGT(0.001)AEPVK      | KETTSGTAEPRKNNKSPA   | PAP/PAPVK         | 1.1                       | 0.45422        | Yes        | Yes                    |
| 804  | IPI00330591 | DNA-binding protein A     | Csda;Msy4;Ybx3;Csda;   | S328  | 1           | 1             | SRPLNAVSDQDGK       | S(1)RPLNAVSDQDGK         | S(ph)RPLNAVSDQDGK    | PKA               | 1.1                       | 0.39396        | Yes        | Yes                    |
| 795  | IPI00116929 | Cleavage stimulation fa   | Cstf3                  | S691  | 1           | 6             | RPNEDSDEEEKGAVVP    | RPNEDS(1)DEEEKGAV        | RPNEDS(ph)DEEEKGAV   | PPVHDIYR          | 1.0                       | 0.38919        | Yes        | Yes                    |
| 995  | IPI00116929 | Cleavage stimulation fa   | Cstf3                  | Y708  | 1           | 23            | RPNEDSDEEEKGAVVP    | RPNEDS(0.418)DEEEK       | RPNEDSDEEEKGAVVP     | PPVHDIYR          | 1.1                       | 0.47517        | Yes        | Yes                    |
| 664  | IPI00112963 | Catenin alpha-1;102 kD    | Ctnna1;Catna1          | S641  | 1           | 8             | TPPEELDDSFETEDFV    | TPPEELDDSFETEDF          | TPPEELDDSFETEDF      | CK2               | 1.0                       | 0.33602        | Yes        | Yes                    |
| 618  | IPI00112963 | Catenin alpha-1;102 kD    | Ctnna1;Catna1          | T634  | 1           | 1             | TPPEELDDSFETEDFV    | T(0.98)PEELDDSF(0.02)D   | T(ph)PEELDDSFETEDF   | CK2               | 1.0                       | 0.30956        | Yes        | Yes                    |
| 1328 | IPI00112963 | Catenin alpha-1;102 kD    | Ctnna1;Catna1          | T645  | 1           | 12            | TPPEELDDSFETEDFV    | T(0.316)PEELDDSF(0.34    | TPPEELDDSFETEDFV     |                   |                           |                | No         | No                     |
| 392  | IPI00125899 | Catenin beta-1;Beta-ca    | Ctnnb1;Catnb;Ctnnb1    | S552  | 1           | 3             | RTSMGGTQQQVFEGVR    | RT(0.096)S(0.904)MGG     | RTS(ph)MGGTQQQVF     | AURORA-A          | 1.3                       | 0.19966        | Yes        | Yes                    |
| 1334 | IPI00125899 | Catenin beta-1;Beta-ca    | Ctnnb1;Catnb;Ctnnb1    | T551  | 1           | 2             | RTSMGGTQQQVFEGVR    | RT(0.431)S(0.138)MGG     | RT(ph)SMGGTQQQVF     | PKA               |                           |                | No         | No                     |
| 1337 | IPI00125899 | Catenin beta-1;Beta-ca    | Ctnnb1;Catnb;Ctnnb1    | T556  | 1           | 7             | RTSMGGTQQQVFEGVR    | RT(0.431)S(0.138)MGG     | RT(ph)SMGGTQQQVFEGVR |                   |                           |                | No         | No                     |
| 189  | IPI00752108 | Catenin delta-1;p120 c    | Ctnnd1;Catsn;Kiaa0384  | S230  | 1           | 15            | HYEDGYPGGSDNYGSL    | HYEDGYPGGSDNYGSL(0.01    | (ca)HYEDGYPGGSDNYGSL | (ph)LSR           | 0.8                       | 0.047488       | Down       | Yes                    |
| 1351 | IPI00752108 | Catenin delta-1;p120 c    | Ctnnd1;Catsn;Kiaa0384  | S232  | 1           | 17            | HYEDGYPGGSDNYGSL    | HYEDGYPGGSDNYGSL(0.001)D | HYEDGYPGGSDNYGSL     | (ph)LSR           |                           |                | No         | No                     |
| 107  | IPI00752108 | Catenin delta-1;p120 c    | Ctnnd1;Catsn;Kiaa0384  | S320  | 1           | 3             | LRSYEDMIGEEVPPDQY   | LRSY(0.5)Y(0.5)EDMIGEE   | LRYS(ph)YEDMIGEEVPP  | PKA/AKT           | 0.7                       | 0.0019583      | Down       | No                     |
| 1353 | IPI00752108 | Catenin delta-1;p120 c    | Ctnnd1;Catsn;Kiaa0384  | Y228  | 1           | 13            | HYEDGYPGGSDNYGSL    | HYEDGYPGGSDNYGSL(0.49    | HYEDGYPGGSDNYGSL     | (ph)ALK           |                           |                | No         | No                     |
| 108  | IPI00752108 | Catenin delta-1;p120 c    | Ctnnd1;Catsn;Kiaa0384  | Y321  | 1           | 4             | LRSYEDMIGEEVPPDQY   | LRSY(0.5)Y(0.5)EDMIGEE   | LRYS(ph)YEDMIGEEVPP  | ALK               | 0.7                       | 0.0019583      | Down       | No                     |
| 1020 | IPI00120919 | RNA polymerase-associ     | Ctr9;Kiaa0155;Sh2bp1;  | T925  | 1           | 13            | KGGEFDEFVNDTDDDD    | KGGEFDEFVNDT(1)DD        | KGGEFDEFVNDT(ph)     | FHA1 Rad53p       | 1.1                       | 0.48584        | Yes        | Yes                    |
| 186  | IPI00118143 | Src substrate cortactin   | Ctnn;Ems1;Ctnn;mCG     | S407  | 1           | 9             | KQTPPASPSQPPIEDRPP  | KQT(0.166)PPAS(0.166     | KQTPPASPS(ph)PQPIEDR | PPSSPIEDAAPFK     | 0.8                       | 0.04546        | Down       | No                     |
| 1139 | IPI00118143 | Src substrate cortactin   | Ctnn;Ems1;Ctnn;mCG     | S417  | 1           | 19            | KQTPPASPSQPPIEDRPP  | KQT(0.001)PPAS(0.005     | KQTPPASPSQPPIEDRPP   | CAMK2             |                           |                | No         | No                     |
| 1141 | IPI00118143 | Src substrate cortactin   | Ctnn;Ems1;Ctnn;mCG     | S418  | 1           | 20            | KQTPPASPSQPPIEDRPP  | KQT(0.001)PPAS(0.005     | KQTPPASPSQPPIEDRPP   | WW GroupIV        |                           |                | No         | No                     |
| 169  | IPI00118143 | Src substrate cortactin   | Ctnn;Ems1;Ctnn;mCG     | T401  | 1           | 3             | KQTPPASPSQPPIEDRPP  | KQT(0.955)PPAS(0.043     | KQT(ph)PPASPSQPPIE   | FHA KAPP          | 0.8                       | 0.035312       | Down       | Yes                    |
| 774  | IPI00854018 | CUG-BP- and ETR-3-li      | Cugbp2;Celf2;Napor;Cu  | S27   | 1           | 9             | ETATELGSPPSNGTANK   | ETATELGS(0.026)G(S0.77   | ETATELGS(ph)PPSNG    | NEK6              | 1.2                       | 0.38131        | Yes        | Yes                    |
| 1317 | IPI00854018 | CUG-BP- and ETR-3-li      | Cugbp2;Celf2;Napor;Cu  | S30   | 1           | 12            | ETATELGSPPSNGTANK   | ET(0.018)AT(0.018)ELS    | ETATELGS(ph)PPSNG    | CK1               |                           |                | No         | No                     |
| 133  | IPI00127811 | Fractalkine;C-X3-C mot    | Cx3cl1;Cx3c;Fkn;Scyd1; | S259  | 1           | 1             | SLGSEIINPVHTDNQFERS | (0.599)LGS(0.401)EINP    | S(ph)LGSSEIINPVHTDN  | PLK1              | 0.7                       | 0.011573       | Down       | No                     |
| 124  | IPI00127811 | Fractalkine;C-X3-C mot    | Cx3cl1;Cx3c;Fkn;Scyd1; | S262  | 1           | 4             | SLGSEIINPVHTDNQFERS | (0.15)LGS(0.85)EINP      | SLGS(ph)EINPVHTDN    | CK1               | 0.7                       | 0.0082169      | Down       | Yes                    |
| 35   | IPI00224867 | Novel protein;Novel p     | D930048N14Rik;RP23     | T15   | 1           | 3             | SLTSSADSPDEALER     | S(0.188)LT(0.792)CS(0    | (ca)SLT(ph)CSSADSP   | PKA/AKT           | 4.1                       | 1.364-14       | Up         | Yes                    |
| 402  | IPI00128975 | Death-associated prote    | Dap                    | S49   | 1           | 9             | DKDDQEWESTSPPKPTV   | DKDDQEWES(0.797)T(C      | DKDDQEWES(ph)TSPPK   | TVFISGVIAR        | 0.9                       | 0.20696        | Yes        | Yes                    |
| 964  | IPI00128975 | Death-associated prote    | Dap                    | S51   | 1           | 11            | DKDDQEWESTSPPKPTV   | DKDDQEWES(0.083)T(C      | DKDDQEWESTS(ph)P     | CDK2              | 1.1                       | 0.46046        | Yes        | Yes                    |
| 309  | IPI00128975 | Death-associated prote    | Dap                    | T50   | 1           | 10            | DKDDQEWESTSPPKPTV   | DKDDQEWES(0.054)T(C      | DKDDQEWEST(ph)SPPK   | TVFISGVIAR        | 0.9                       | 0.13472        | No         | No                     |
| 8    | IPI00128975 | Death-associated prote    | Dap                    | T56   | 1           | 2             | PTVFISGVIARGDK      | PT(0.983)VFIS(0.017)G    | (ca)PT(ph)VFISGVIAR  | AURORA            | 21.0                      | 4.26E-65       | Up         | Yes                    |
| 596  | IPI00135475 | Drebrin;Developmenta      | Dbn1;Drba;Dbn1;Drba;   | S142  | 1           | 2             | LSSPVLHR            | LS(0.003)S(0.997)PVLH    | LSS(ph)PVLHR         | CHK1/2            | 1.0                       | 0.29703        | Yes        | Yes                    |
| 126  | IPI00468380 | Serine/threonine-prote    | Dck1;Dcamk1;Dckl;Dc    | S305  | 1           | 4             | SKSPASTSSVNGTPGSQ   | S(0.839)KS(0.052)PAS(0   | (ca)S(ph)KSPASTSSVN  | PKA               | 0.7                       | 0.0086256      | Down       | Yes                    |
| 1310 | IPI00468380 | Serine/threonine-prote    | Dck1;Dcamk1;Dckl;Dc    | S307  | 1           | 4             | RSKSPASTSSVNGTPGS   | RS(0.038)KS(0.459)PAS    | RSKS(ph)PASTSSVNGT   | CAMK2             |                           |                | No         | No                     |
| 245  | IPI00468380 | Serine/threonine-prote    | Dck1;Dcamk1;Dckl;Dc    | S32   | 1           | 6             | VNGLPSPTSAHCSFYR    | VNGLPS(0.957)PT(0.02     | VNGLPS(ph)PTSAHCS    | GSK3              | 0.9                       | 0.088939       | Yes        | Yes                    |
| 160  | IPI00468380 | Serine/threonine-prote    | Dck1;Dcamk1;Dckl;Dc    | S36   | 2           | 10            | VNGLPSPTSAHCSFYR    | VNGLPS(0.267)PT(0.62     | VNGLPSPT(ph)HS(ph)   | GSK3              | 0.8                       | 0.029142       | Down       | No                     |
| 1314 | IPI00468380 | Serine/threonine-prote    | Dck1;Dcamk1;Dckl;Dc    | S40   | 2           | 14            | VNGLPSPTSAHCSFYR    | VNGLPS(0.226)PT(0.22     | VNGLPSPTS(ph)AHC     | CK1               | 1.0                       | 0.22           | No         | No                     |
| 317  | IPI00468380 | Serine/threonine-prote    | Dck1;Dcamk1;Dckl;Dc    | T34   | 2           | 8             | VNGLPSPTSAHCSFYR    | VNGLPS(0.267)PT(0.62     | VNGLPSPT(ph)HS(ph)   | FHA KAPP          | 0.9                       | 0.14251        | No         | No                     |
| 202  | IPI00468380 | Serine/threonine-prote    | Dck1;Dcamk1;Dckl;Dc    | Y42   | 2           | 16            | VNGLPSPTSAHCSFYR    | VNGLPS(0.942)PT(0.18     | VNGLPS(ph)PTSAHCSFY  | (ph)R             | 0.8                       | 0.055917       | No         | No                     |
| 259  | IPI00468380 | Serine/threonine-prote    | Dck1;Dcamk1;Dckl;Dc    | S330  | 2           | 1             | SPSPSPTSPGSLR       | S(0.588)PS(0.411)PS(0    | S(ph)SPSPSPT(ph)SPGS | CK1               | 1.0                       | 0.099837       | Yes        | Yes                    |
| 1330 | IPI00468380 | Serine/threonine-prote    | Dck1;Dcamk1;Dckl;Dc    | S334  | 1           | 5             | SPSPSPTSPGSLR       | S(0.002)PS(0.008)PS(0    | SPSPS(ph)PTSPGSLR    | CK1               |                           |                | No         | No                     |
| 289  | IPI00468380 | Serine/threonine-prote    | Dck1;Dcamk1;Dckl;Dc    | S337  | 1           | 5             | SPSPSPTSPGSLR       | SPSPS(0.001)PT(0.009)    | SPSPSPTS(ph)PGSLR    | WW GroupIV        | 0.9                       | 0.11851        | Yes        | Yes                    |
| 443  | IPI00468380 | Serine/threonine-prote    | Dck1;Dcamk1;Dckl;Dc    | S340  | 1           | 11            | SPSPSPTSPGSLR       | S(0.001)PS(0.001)PS(0    | (ca)SPSPSPTSPGS(ph)  | CK1               | 1.0                       | 0.23093        | Yes        | Yes                    |
| 112  | IPI00468380 | Serine/threonine-prote    | Dck1;Dcamk1;Dckl;Dc    | T336  | 1           | 7             | SPSPSPTSPGSLR       | SPSPSPT(0.5)S(0.5)PS     | SPSPSPT(ph)SPGSLR    |                   | 1.7                       | 0.0023412      | Down       | No                     |
| 574  | IPI00896604 | Probable ATP-depende      | Ddx10                  | T587  | 1           | 14            | LASGDGDEEQDEETE     | LASGDGDEEQDEETE(1)E      | LASGDGDEEQDEETE(ph   | CK2               | 0.2                       | 0.28731        | Yes        | Yes                    |
| 707  | IPI00120691 | Nucleolar RNA helicase    | Ddx21;Ddx21;mCG        | S118  | 1           | 8             | EITEEPEEEADMPKPK    | EITEEPEE(1)EEADMPK       | EITEEPEE(ph)EEEADM   | CK2               | 1.2                       | 0.35397        | Yes        | Yes                    |
| 770  | IPI00113576 | ATP-dependent RNA he      | Ddx24;Ddx24            | S126  | 1           | 5             | AQAVSEEEEEEGSSSP    | AQAVS(1)EEEEEEEGSS       | AQAVS(ph)EEEEEEEG    | CK2               | 1.2                       | 0.37858        | Yes        | Yes                    |
| 745  | IPI00329839 | ATP-dependent RNA he      | Ddx42;Ddx42            | S185  | 1           | 23            | YMAENPTAGVVQEEED    | YMAENPTAGVVQEEED         | YMAENPTAGVVQEEED     | NLEYS(ph)DGNPIAPS | 1.2                       | 0.37075        | Yes        | Yes                    |
| 1404 | IPI00329839 | ATP-dependent RNA he      | Ddx42;Ddx42            | S193  | 1           | 31            | YMAENPTAGVVQEEED    | Y(0.078)MAENPT(0.027     | YMAENPTAGVVQEEED     | NLEYS(ph)DGNPIAPS | 1.2                       | 0.37075        | Yes        | Yes                    |
| 587  | IPI00474721 | Putative uncharacteriz    | Ddx54;Ddx54            | S774  | 1           | 6             | IDDRDS1JEEEGPSNQR   | IDDRDS(1)JEEEGPSNQR      | IDDRDS(ph)JEEEGPSN   | PKA               | 1.2                       | 0.29263        | Yes        | Yes                    |
| 759  | IPI00339468 | ATP-dependent RNA he      | Dhx9;Ddx9              | S137  | 1           | 16            | AEAENNSGVESGYGSP    | AEAENNSGVESGYGSL(1       | AEAENNSGVESGYGSL     | CK1               | 1.2                       | 0.37521        | Yes        | Yes                    |
| 175  | IPI00331314 | Disco-interacting prote   | Dip2b;Kiaa1463         | Y97   | 1           | 1             | YRSDIHTAEVQAALAK    | Y(0.877)RS(0.123)DIHT    | Y(ph)RSDIHTAEVQAAL   | SRC               | 0.8                       | 0.04027        | Down       | Yes                    |
| 915  | IPI00113635 | H/ACA ribonucleoprote     | Dck1;Dck1;BC068171     | S481  | 1           | 5             | TVLESGGTGDGDNDDTT   | T(0.009)VL(0.99)GGE      | TVLES(ph)GGTGDGDD    | CK2               | 1.1                       | 0.44543        | Yes        | Yes                    |
| 799  | IPI00113635 | H/ACA ribonucleoprote     | Dck1;Dck1;BC068171     | S508  | 1           | 8             | VKVVEEMSE           | VKVVEEMS(1)E             | VKVVEEMS(ph)E        |                   | 1.0                       | 0.39186        | Yes        | Yes                    |
| 632  | IPI00113635 | H/ACA ribonucleoprote     | Dck1;Dck1;BC068171     | T485  | 1           | 9             | TVLESGGTGDGDNDDTT   | T(0.032)VL(0.089)GG      | TVLESGGT(ph)GGDNDD   | TK                | 1.0                       | 0.31639        | No         | No                     |
| 1063 | IPI00125861 | Disks large homolog 1;    | Dlg1;Dlgh1;Dlgl1;Dlgh1 | S694  | 1           | 5             | NKDQSEQETSADQHQV    | NKDQS(0.333)EQET(0.3     | NKDQS(ph)EQETSADQ    | CK2               |                           |                | No         | No                     |
| 1064 | IPI00125861 | Disks large homolog 1;    | Dlg1;Dlgh1;Dlgl1;Dlgh1 | S699  | 1           | 10            | NKDQSEQETSADQHQV    | NKDQS(0.052)EQET(0.4     | NKDQSEQET(ph)SDAQ    | HVTSNASDESSEYR    |                           |                | No         | No                     |
| 1068 | IPI00125861 | Disks large homolog 1;    | Dlg1;Dlgh1;Dlgl1;Dlgh1 | S707  | 1           | 18            | NKDQSEQETSADQHQV    | NKDQS(0.004)EQET(0.0     | NKDQSEQETSADQHQV     | (ph)NASDESSEYR    |                           |                | No         | No                     |
| 771  | IPI00125861 | Disks large homolog 1;    | Dlg1;Dlgh1;Dlgl1;Dlgh1 | S710  | 1           | 21            | NKDQSEQETSADQHQV    | NKDQSEQETSADQHQV         | NKDQSEQETSADQHQV     | CK2               | 1.0                       | 0.37939        | No         | No                     |
| 1071 | IPI00125861 | Disks large homolog 1;    | Dlg1;Dlgh1;Dlgl1;Dlgh1 | T698  | 1           | 9             | NKDQSEQETSADQHQV    | NKDQS(0.052)EQET(0.4     | NKDQSEQET(ph)SDAQ    | FHA KAPP          |                           |                | No         | No                     |
| 1073 | IPI00125861 | Disks large homolog 1;    | Dlg1;Dlgh1;Dlgl1;Dlgh1 | T706  | 1           | 17            | NKDQSEQETSADQHQV    | NKDQSEQETSADQHQV         | NKDQSEQETSADQHQV     | FHA KAPP          |                           |                | No         | No                     |
| 1354 | IPI00875866 | Dnal (Hsp40) homolog      | Dnajc5;RP23-33L3.3-00  | S12   | 1           | 5             | SLSTSGESLYHVLGLDKN  | S(0.164)LS(0.148)T(0.1   | SLSTS(ph)GESLYHVLG   | NEK6              |                           |                | No         | No                     |
| 936  | IPI00875866 | Dnal (Hsp40) homolog      | Dnajc5;RP23-33L3.3-00  | S8    | 1           | 5             | SLSTSGESLYHVLGLDKN  | S(0.613)LS(0.356)T(0.0   | (ca)S(ph)LSTSGESLYH  | CAMK2             | 1.1                       | 0.45117        | Yes        | Yes                    |
| 400  | IPI00469323 | DNA (cytosine-5)-meth     | Dnmt1;Dnmt;Met1;Uir    | S724  | 1           | 17            | EADDDDEADDVSEMP     | EADDDDEADDVSEMP          | EADDDDEADDVSEMP      | CDK2              | 0.9                       | 0.20554        | No         | No                     |
| 370  | IPI00816914 | Dedicator of cytokines    | Dock7;Gm430;Kiaa177    | S1422 | 1           | 3             | SPSGSAFGSQENLR      | S(0.111)PS(0.82)GS(0.0   | SPS(ph)SGSAFGSQENL   | PKA/AKT           | 0.9                       | 0.18208        | Yes        | Yes                    |
| 1061 | IPI00816914 | Dedicator of cytokines    | Dock7;Gm430;Kiaa177    | S896  | 1           | 1             | SLSNSNPDISGTPSPDDI  | S(0.467)LS(0.267)NS(0    | S(ph)SLSNSNPDISGTP   | PKA/AKT           |                           |                | No         | No                     |



| No   | IPI Numbers | Protein Names            | Gene Names                | pAA   | Number of P | Position in p | Peptide Sequence    | Phospho (STY) Probabi   | Modified Sequence          | Best Motif     | Ratio <sup>1</sup> of Phd | Ratio Signif | Up-/Down-r | Localized phosphosite? |
|------|-------------|--------------------------|---------------------------|-------|-------------|---------------|---------------------|-------------------------|----------------------------|----------------|---------------------------|--------------|------------|------------------------|
| 685  | IPI00330289 | Erythrocyte protein ba   | Epb4.112;Epb4112;Epb4     | S38   | 1           | 12            | AKEVENEQTPVSEPEEEK  | AKEVENEQ(T.0.04)PVSI    | AKEVENEQTPVSI(ph)E         | CK2            | 1.0                       | 0.34423      | Yes        | Yes                    |
| 127  | IPI00330289 | Erythrocyte protein ba   | Epb4.112;Epb4112;Epb4     | S86   | 1           | 1             | SYNLVVAK            | S(0.738)Y(0.262)NLVVA   | S(ph)YNLVAK                | PKD            | 0.7                       | 0.0099869    | Down       | No                     |
| 1405 | IPI00229295 | Band 4.1-like protein 3  | Epb413;Dal1;Epb4.113      | S790  | 1           | 8             | VESTSVGSIISPGGAK    | VESTSVGS(0.5)S(0.5)P    | VESTSVGSIISPGGAK           | CK1            | 1.1                       | 0.073783     | Yes        | Yes                    |
| 228  | IPI00229295 | Band 4.1-like protein 3  | Epb413;Dal1;Epb4.113      | S792  | 1           | 10            | VESTSVGSIISPGGAK    | VESTSVGS(0.019)S(0.9)   | VESTSVGSIISPGGAK           | CK1            | 1.4                       | 0.073783     | Yes        | Yes                    |
| 384  | IPI00875692 | Excision repair cross-co | Erc5;Erc5;Erc5;Xpg        | S384  | 1           | 12            | NSGATADAGSISPR      | NSGATADAGSIS(1)PR       | NSGATADAGSIS(ph)P          | CDK1           | 1.3                       | 0.19444      | Yes        | Yes                    |
| 851  | IPI00154109 | Protein FAM122A          | Fam122a                   | S32   | 1           | 1             | SNSAPLIHGLSDSPVQ    | S(0.531)NS(0.449)APLI   | S(ph)NSAPLIHGLSDSP         | NIMA           | 1.1                       | 0.41723      | Yes        | No                     |
| 955  | IPI00154109 | Protein FAM122A          | Fam122a                   | S34   | 1           | 3             | SNSAPLIHGLSDSPVQ    | S(0.25)NS(0.673)APLI    | SNS(ph)APLIHGLSDSP         | 14-3-3 binding | 1.1                       | 0.45792      | No         | No                     |
| 968  | IPI00468516 | Protein FAM21;Protein    | Fam21;D6Wsu116e;Kia       | S388  | 1           | 15            | ARPAQAPVSEELPPSPK   | ARPAQAPVSEELPPS(1)P     | ARPAQAPVSEELPPSP           | WW GroupIV     | 1.1                       | 0.46233      | Yes        | Yes                    |
| 297  | IPI00223670 | Protein FAM40A;Prote     | Fam40a;Kiaa1761;Fam       | S335  | 1           | 3             | AASPPASASDLIEQ      | AAS(0.976)PPAS(0.02)A   | AAS(ph)PPASASDLIEQ         | CAMK2          | 0.9                       | 0.12522      | Yes        | Yes                    |
| 461  | IPI00266942 | Extended synaptotagm     | Fam62b;D12Erd551e;        | S662  | 1           | 3             | SSSLLASPSHIAAK      | S(0.023)S(0.018)S(0.94  | SSS(ph)SLLASPSHIAAK        | CHK1/2         | 1.2                       | 0.23969      | Yes        | Yes                    |
| 1179 | IPI00266942 | Extended synaptotagm     | Fam62b;D12Erd551e;        | S679  | 2           | 5             | EPTPSIASDISLIATQELR | EPT(0.312)PS(0.447)IAS  | EPTPS(ph)IASDISLIATQELR    |                | 1.1                       | 0.35766      | No         | No                     |
| 716  | IPI00266942 | Extended synaptotagm     | Fam62b;D12Erd551e;        | S682  | 2           | 8             | EPTPSIASDISLIATQELR | EPT(0.036)PS(0.036)IAS  | EPTPSIAS(ph)DISLIATQELR    | CK1            | 1.2                       | 0.35766      | Yes        | Yes                    |
| 717  | IPI00266942 | Extended synaptotagm     | Fam62b;D12Erd551e;        | S685  | 2           | 11            | EPTPSIASDISLIATQELR | EPT(0.036)PS(0.036)IAS  | EPTPSIAS(ph)DISLIATQELR    | PLK1           | 1.2                       | 0.35766      | Yes        | Yes                    |
| 754  | IPI00874398 | Protein FAM65A           | Fam65a;Kiaa1930           | S417  | 1           | 7             | FSTYSQSPPTPSLR      | FS(0.005)T(0.005)Y(0.0  | FSTYSQSPPTPSLR             | CK1            | 1.0                       | 0.37362      | Yes        | Yes                    |
| 1245 | IPI00344835 | Protein FAM65C           | Fam65c                    | S635  | 1           | 7             | LASPNLSR            | LASPNLS(1)R             | LASPNLS(ph)R               | CK1            | 1.1                       | 0.39815      | Yes        | Yes                    |
| 294  | IPI00678532 | Regulator of microtubu   | Fam82a2;Fam82c;1200       | S46   | 1           | 3             | SHSLPNSLDYQAQASER   | S(0.117)HS(0.882)LPNS   | SHS(ph)PNSLDYQAQASER       | 14-3-3 binding | 1.3                       | 0.12303      | Yes        | Yes                    |
| 239  | IPI00757373 | Farp1 protein;Farp1 pr   | Farp1;Farp1               | S373  | 1           | 1             | SLVSQPTAPNSEVPK     | S(0.981)LV(0.019)QPT    | S(ph)LVSQPTAPNSEV          | CK1            | 0.9                       | 0.083133     | Yes        | Yes                    |
| 282  | IPI00757373 | Farp1 protein;Farp1 pr   | Farp1;Farp1               | S427  | 1           | 11            | ACTLELGHQSPALPK     | ACTLELGHQSP(1)PALPK     | ACTLELGHQSP(ph)PALPK       |                | 0.9                       | 0.11227      | Yes        | Yes                    |
| 816  | IPI00757373 | Farp1 protein;Farp1 pr   | Farp1;Farp1               | S892  | 1           | 12            | SPDEATAADQESDDL     | SPDEATAADQES(1)EDD      | SPDEATAADQES(ph)EDD        | JLSDSASR       | 1.0                       | 0.39815      | Yes        | Yes                    |
| 990  | IPI00757373 | Farp1 protein;Farp1 pr   | Farp1;Farp1;Farp1         | S23   | 1           | 10            | LGAPENSGISTLER      | LGAPENS(0.006)GIS(0.8   | LGAPENSGIS(ph)TLER         | CK2            | 1.1                       | 0.47137      | Yes        | Yes                    |
| 822  | IPI00757373 | Farp1 protein;Farp1 pr   | Farp1;Farp1;Farp1         | T24   | 1           | 11            | LGAPENSGISTLER      | LGAPENSGIS(0.046)T(0    | LGAPENSGIST(ph)LER         |                | 1.0                       | 0.4006       | Yes        | Yes                    |
| 86   | IPI00623114 | Cadherin FAT1 isoform    | Fat1;Fat1;Fath            | S4483 | 1           | 7             | DMPAAGSLGSSSR       | DMPAAGS(0.997)LGS(0)    | DMPAAGS(ph)LGS             | GSK3           | 0.6                       | 0.0004696    | Down       | Yes                    |
| 1291 | IPI00623114 | Cadherin FAT1 isoform    | Fat1;Fat1;Fath            | S4486 | 3           | 10            | DMPAAGSLGSSSR       | DMPAAGS(0.75)LGS(0)     | DMPAAGS(ph)LGS             | CK1            | 1.1                       | 0.4006       | No         | No                     |
| 1296 | IPI00623114 | Cadherin FAT1 isoform    | Fat1;Fat1;Fath            | S4487 | 3           | 11            | DMPAAGSLGSSSR       | DMPAAGS(0.75)LGS(0)     | DMPAAGS(ph)LGS             | NEK6           | 1.1                       | 0.4006       | No         | No                     |
| 1301 | IPI00623114 | Cadherin FAT1 isoform    | Fat1;Fat1;Fath            | S4488 | 3           | 12            | DMPAAGSLGSSSR       | DMPAAGS(0.75)LGS(0)     | DMPAAGS(ph)LGS             | S(ph)SR        | 1.1                       | 0.4006       | No         | No                     |
| 767  | IPI00228716 | Protocadherin Fat 4;FA   | Fat4;Fatj                 | S4878 | 1           | 7             | LSQVNESDADDEDNYGA   | LSQVNES(1)DADDEDNY      | LSQVNES(ph)DADDEDNY        | GAR            | 1.0                       | 0.37784      | Yes        | Yes                    |
| 419  | IPI00378206 | F-box/WD repeat-conta    | Fbxw8;Fbxw8               | S84   | 1           | 1             | SRSPPDRDATEPEPLVDC  | S(0.536)RS(0.459)PPDR   | S(ph)RSPPDRDATEPEPLVDC     | CK1            | 1.3                       | 0.21729      | Yes        | Yes                    |
| 927  | IPI00378206 | F-box/WD repeat-conta    | Fbxw8;Fbxw8               | S86   | 1           | 3             | SRSPPDRDATEPEPLVDC  | S(0.183)RS(0.817)PPDR   | SRS(ph)RSPPDRDATEPEPLVDC   | 14-3-3 binding | 1.1                       | 0.44798      | Yes        | Yes                    |
| 502  | IPI00223046 | FH1/FH2 domain-conta     | Fhod1;Fhos1               | S370  | 1           | 1             | SLEGGGCPVR          | S(1)LEGGGCPVR           | S(ph)LEGGGCPVR             | AURORA         | 1.0                       | 0.25805      | Yes        | Yes                    |
| 813  | IPI00881462 | Pre-mRNA 3'-end-proce    | Fip11;Fip11;Fip11         | S493  | 1           | 3             | DHSPTPSVFNSEDER     | DHS(0.984)PT(0.008)PS   | DHS(ph)PTPSVFNSEDER        | PKA/AKT        | 1.1                       | 0.39743      | Yes        | Yes                    |
| 832  | IPI00881462 | Pre-mRNA 3'-end-proce    | Fip11;Fip11;Fip11         | T495  | 1           | 7             | ERDHSPTPSVFNSEDER   | ERDHS(0.163)PT(0.827    | ERDHSPT(ph)PSVFNSEDER      |                | 1.1                       | 0.40595      | Yes        | Yes                    |
| 1023 | IPI00458068 | FK506-binding protein    | Fkbp15;Fkbp133;Kiaa0      | S1091 | 1           | 3             | RLSLTPDEPEKPPALPD   | RLS(0.982)LT(0.018)PD   | RLS(ph)LTPEPEKPPALPD       | PKA/AKT        | 1.1                       | 0.48689      | Yes        | Yes                    |
| 842  | IPI00921658 | Filamin, alpha;Filamin   | Flna;RP23-436K3.1-003     | S2152 | 1           | 4             | RAPSVANIGSHCDLSLK   | RAPS(1)VANIGSHCDLSLK    | RAPS(ph)VANIGSHCDLSLK      | PKA/AKT        | 1.1                       | 0.41011      | Yes        | Yes                    |
| 63   | IPI00664670 | Filamin-C;Gamma-filam    | Flncc;Abpl;Fln2;Flncc;Abp | S2234 | 1           | 3             | LGSFGSITR           | LGS(1)FGSITR            | LGS(ph)FGSITR              | PKA/AKT        | 2.3                       | 6.094E-06    | Up         | Yes                    |
| 869  | IPI00345373 | Formin-like protein 2;P  | Fmnl2;Kiaa1902;Man;F      | S687  | 2           | 6             | ITQKASSKVTLLEANR    | IT(0.983)QKAS(0.508)S   | (ca)IT(ph)QKAS(ph)SK       | CK1            | 1.1                       | 0.4233       | No         | No                     |
| 999  | IPI00345373 | Formin-like protein 2;P  | Fmnl2;Kiaa1902;Man;F      | S688  | 2           | 7             | ITQKASSKVTLLEANR    | IT(0.984)QKAS(0.128)S   | (ca)IT(ph)QKAS(ph)KVTLEANR |                | 1.1                       | 0.4772       | Yes        | Yes                    |
| 933  | IPI00345373 | Formin-like protein 2;P  | Fmnl2;Kiaa1902;Man;F      | T683  | 2           | 2             | ITQKASSKVTLLEANR    | IT(0.984)QKAS(0.128)S   | (ca)IT(ph)QKAS(ph)K        | FHA KAPP       | 1.1                       | 0.45013      | Yes        | Yes                    |
| 456  | IPI00876259 | Formin binding protein   | Fnbp1;RP23-24313.2-00     | S295  | 1           | 3             | TVSDNLSLSSK         | T(0.008)VS(0.992)DNSL   | TVS(ph)DNSLSSK             | PKA            | 1.0                       | 0.23668      | Yes        | Yes                    |
| 1207 | IPI00876259 | Formin binding protein   | Fnbp1;RP23-24313.2-00     | S298  | 1           | 6             | TVSDNLSLSSK         | T(0.09)VS(0.431)DNSL    | TVS(ph)DNSLSSK             | PLK1           | 1.0                       | 0.23668      | No         | No                     |
| 503  | IPI00761177 | Formin-binding protein   | Fnbp1;Toca1;Fnbp1;T       | S295  | 1           | 3             | TISDGTISAAK         | T(0.027)IS(0.949)DGT    | TIS(ph)DGTISAAK            | PKD            | 2.5                       | 8.11E-07     | Up         | Yes                    |
| 194  | IPI00761177 | Formin-binding protein   | Fnbp1;Toca1;Fnbp1;T       | S501  | 1           | 15            | HSSDINHVLTVQGRESPE  | HS(0.001)DINHVLTV(0.0   | HSSDINHVLTVQGRESPE         | PKA            | 0.8                       | 0.052042     | Yes        | Yes                    |
| 150  | IPI00761177 | Formin-binding protein   | Fnbp1;Toca1;Fnbp1;T       | T496  | 1           | 10            | HSSDINHVLTVQGRESPE  | HS(0.002)S(0.008)DINH   | HSSDINHVLTV(ph)QGRESPE     | YDDANQEV       | 0.8                       | 0.018956     | Down       | No                     |
| 522  | IPI00229601 | Fibronectin type III don | Fndc3b;Fad104;Kiaa41      | S208  | 1           | 3             | LNSPPTIYK           | LNS(0.993)PPS(0.003)T   | LNS(ph)PPPTIYK             | CAMK2          | 1.0                       | 0.26587      | Yes        | Yes                    |
| 518  | IPI00224112 | Fibroblast growth fact   | Frs2;Frs2a                | S292  | 1           | 25            | LEQLGKDPVSGSGAGNT   | LEQLGKDPVSGSGAGNT       | LEQLGKDPVSGSGAGNT          | F box bTrCP    | 1.0                       | 0.26353      | Yes        | No                     |
| 1229 | IPI00224112 | Fibroblast growth fact   | Frs2;Frs2a                | S327  | 1           | 3             | LTSTSTSDTQNNINSAQR  | LT(0.484)S(0.484)T(0.0  | LT(ph)STSTSDTQNNINSAQR     | PKA/AKT        | 1.0                       | 0.26353      | Yes        | No                     |
| 1231 | IPI00224112 | Fibroblast growth fact   | Frs2;Frs2a                | S329  | 1           | 5             | LTSTSTSDTQNNINSAQR  | LT(0.23)S(0.23)T(0.23)  | LT(ph)STSTSDTQNNINSAQR     |                | 1.0                       | 0.26353      | No         | No                     |
| 1233 | IPI00224112 | Fibroblast growth fact   | Frs2;Frs2a                | S331  | 1           | 7             | LTSTSTSDTQNNINSAQR  | LT(0.18)S(0.18)T(0.18)  | LT(ph)STSTSDTQNNINSAQR     | CK1            | 1.0                       | 0.26353      | No         | No                     |
| 1237 | IPI00224112 | Fibroblast growth fact   | Frs2;Frs2a                | T326  | 1           | 2             | LTSTSTSDTQNNINSAQR  | LT(0.484)S(0.484)T(0.0  | LT(ph)STSTSDTQNNINSAQR     | PKA            | 1.0                       | 0.26353      | No         | No                     |
| 1240 | IPI00224112 | Fibroblast growth fact   | Frs2;Frs2a                | T328  | 1           | 4             | LTSTSTSDTQNNINSAQR  | LT(0.027)S(0.473)T(0.4  | LTS(ph)STSTSDTQNNINSAQR    | NEK6           | 1.0                       | 0.26353      | No         | No                     |
| 1244 | IPI00224112 | Fibroblast growth fact   | Frs2;Frs2a                | T330  | 1           | 6             | LTSTSTSDTQNNINSAQR  | LT(0.18)S(0.18)T(0.18)  | LT(ph)STSTSDTQNNINSAQR     | CK1            | 1.0                       | 0.26353      | No         | No                     |
| 1247 | IPI00224112 | Fibroblast growth fact   | Frs2;Frs2a                | T333  | 1           | 9             | LTSTSTSDTQNNINSAQR  | LT(0.117)S(0.117)T(0.1  | LTSTSTSDT(ph)QNNINSAQR     | FHA2 Rad53p    | 1.0                       | 0.26353      | No         | No                     |
| 763  | IPI00119124 | FUN14 domain-contain     | Fundc1                    | S13   | 1           | 9             | NPPPPQDYSDDESVEYL   | NPPPPQDY(0.096)ES(0.9   | NPPPPQDYES(ph)DDES         | CK2            | 1.2                       | 0.37664      | Yes        | Yes                    |
| 1200 | IPI00119124 | FUN14 domain-contain     | Fundc1                    | S17   | 1           | 13            | NPPPPQDYSDDESVEYL   | NPPPPQDY(0.073)ES(0.0   | NPPPPQDYSDDES(ph)PLK1      |                | 1.0                       | 0.37664      | Yes        | Yes                    |
| 1208 | IPI00119124 | FUN14 domain-contain     | Fundc1                    | T24   | 1           | 20            | NPPPPQDYSDDESVEYL   | NPPPPQDY(0.073)ES(0.0   | NPPPPQDYSDDES(ph)NEK6      |                | 1.0                       | 0.37664      | No         | No                     |
| 615  | IPI00119124 | FUN14 domain-contain     | Fundc1                    | Y11   | 1           | 7             | NPPPPQDYSDDESVEYL   | NPPPPQDY(0.5)ES(0.5)D   | NPPPPQDY(ph)ESDDESVEYL     | DLTEYAR        | 1.2                       | 0.30751      | No         | No                     |
| 1213 | IPI00119124 | FUN14 domain-contain     | Fundc1                    | Y18   | 1           | 14            | NPPPPQDYSDDESVEYL   | NPPPPQDY(0.14)ES(0.22   | NPPPPQDYES(ph)DDES         | EGFR           | 1.0                       | 0.30751      | No         | No                     |
| 1217 | IPI00119124 | FUN14 domain-contain     | Fundc1                    | Y26   | 1           | 22            | NPPPPQDYSDDESVEYL   | NPPPPQDY(0.073)ES(0.0   | NPPPPQDYSDDES(ph)YEVLDL    | TEYAR          | 1.0                       | 0.30751      | No         | No                     |
| 1190 | IPI00126389 | Fragile X mental retard  | Fxr2;Fxr2h;RP23-4221      | T600  | 1           | 1             | TDGSIQDRQPVTVADYI   | T(0.498)DGS(0.413)S(0.0 | T(ph)DGSIQDRQPVTVADYI      | FHA KAPP       | 1.0                       | 0.30751      | No         | No                     |
| 1193 | IPI00126389 | Fragile X mental retard  | Fxr2;Fxr2h;RP23-4221      | S455  | 1           | 16            | TGGPAYGSSDPSTASE    | TGGPAYGSP(0.002)S(0.    | TGGPAYGSSDPST(ph)CK2       |                | 1.0                       | 0.30336      | No         | No                     |
| 604  | IPI00130095 | Ras GTPase-activating    | G3bp1;G3bp;G3bp1;G        | S149  | 1           | 17            | YQDEVFGGVTPEQEEIS   | YQDEVFGGVTPEQEEIS       | YQDEVFGGVTPEQEEIS          | CK2            | 1.0                       | 0.30336      | Yes        | Yes                    |
| 874  | IPI00130095 | Ras GTPase-activating    | G3bp1;G3bp;G3bp1;G        | S229  | 1           | 1             | STSPAPADVAPAQEDLR   | S(0.526)T(0.237)S(0.23  | S(ph)TSPAPADVAPAQEDLR      |                | 1.1                       | 0.42707      | No         | No                     |
| 1183 | IPI00130095 | Ras GTPase-activating    | G3bp1;G3bp;G3bp1;G        | S231  | 1           | 3             | STSPAPADVAPAQEDLR   | S(0.147)T(0.113)S(0.74  | STS(ph)PAPADVAPAQEDLR      | PKD            | 1.0                       | 0.42707      | No         | No                     |
| 853  | IPI00124245 | Ras GTPase-activating    | G3bp2;G3bp2               | S225  | 1           | 1             | SATPPPAEPASLPQEPK   | S(0.646)AT(0.354)PPPA   | S(ph)ATPPPAEPASLPQEPK      |                | 1.1                       | 0.41804      | No         | No                     |
| 527  | IPI00874964 | Glyceraldehyde-3-phos    | Gapdh;Gapd;Gapdh;AK       | T186  | 1           | 22            | VHIDNFVIGVEGLMTTVAH | VHIDNFVIGVEGLMTTVAH     | VHIDNFVIGVEGLMTTVAH        | ITAT(ph)QK     | 1.0                       | 0.26732      | Yes        | Yes                    |
| 151  | IPI00460042 | GTPase-activating Rap    | Garn1;Kiaa0884;Tulip1     | S796  | 1           | 3             | SSSSTDILEPFTVER     | S(0.106)S(0.074)S(0.67  | SSS(ph)STDILEPFTVER        | PKA/AKT        | 0.8                       | 0.019035     | Down       | No                     |
| 1326 | IPI00869450 | Growth arrest specific   | Gas7;mcG 133182;Ga        | S60   | 1           | 22            | YYVNTTNETTWERPSS    | YYVNTTNETTWERPSS        | YYVNTTNETTWERPSS           | CK1            | 1.0                       | 0.019035     | No         | No                     |

| No   | IPI Numbers | Protein Names            | Gene Names            | pAA   | Number of | Position in p | Peptide Sequence   | Phospho (STY) Probabi    | Modified Sequence               | Best Motif     | Ratio <sup>1</sup> of Phd | Ratio Signif | Up-/Down-r | Localized phosphosite? |
|------|-------------|--------------------------|-----------------------|-------|-----------|---------------|--------------------|--------------------------|---------------------------------|----------------|---------------------------|--------------|------------|------------------------|
| 113  | IPI00869450 | Growth arrest specific   | Gas7;mcCG_133182;Gas  | S62   | 1         | 24            | YYVNTTNETTWERPSS   | YYVNTTNETTWERP(S)        | YYVNTTNETTWERPSSPGISAS(ph)PGPHR | 0.7            | 0.0023958                 | Down         | Yes        |                        |
| 1259 | IPI00463493 | Gbf1 protein             | Gbf1                  | S1298 | 1         | 10            | ADAPDAGAQSDELSPSY  | ADAPDAGAQS(0.497)D       | ADAPDAGAQS(ph)DSECK2            |                |                           |              | No         |                        |
| 835  | IPI00463493 | Gbf1 protein             | Gbf1                  | S1300 | 1         | 12            | ADAPDAGAQSDELSPSY  | ADAPDAGAQS(0.194)D       | ADAPDAGAQS(ph)DSECK2            | 1.0            | 0.40817                   |              | Yes        |                        |
| 887  | IPI00463493 | Gbf1 protein             | Gbf1                  | S1318 | 1         | 4             | GYTSDSEVYTDHGRPGK  | GY(0.022)T(0.062)S(0.8)  | GYTS(ph)DSEVYTDHGRPGK           | 1.1            | 0.43158                   |              | Yes        |                        |
| 961  | IPI00463493 | Gbf1 protein             | Gbf1                  | S1320 | 1         | 6             | GYTSDSEVYTDHGRPGK  | GY(0.028)T(0.028)S(0.1)  | (ca)GYTSDS(ph)EYVTDHGRPGK       | 1.1            | 0.45966                   |              | Yes        |                        |
| 972  | IPI00463493 | Gbf1 protein             | Gbf1                  | T1317 | 1         | 3             | GYTSDSEVYTDHGRPGK  | GY(0.105)T(0.789)S(0.1)  | GYT(ph)DSEVYTDHGRPGK            | 1.1            | 0.46435                   |              | Yes        |                        |
| 1264 | IPI00463493 | Gbf1 protein             | Gbf1                  | T1324 | 1         | 10            | GYTSDSEVYTDHGRPGK  | GY(0.085)T(0.085)S(0.0)  | (ca)GYTSDSEVYTDHGRPGK           |                |                           |              | No         |                        |
| 1279 | IPI00406371 | Glucosamine-fructose     | Gfpt1;Gfpt;Gfpt1;Gfpt | S259  | 1         | 3             | VDSSTCLFPVEEK      | VDS(0.487)T(0.487)T(0.0) | VDS(ph)TCLFPVEEK                | CHK1/2         |                           |              | No         |                        |
| 1285 | IPI00406371 | Glucosamine-fructose     | Gfpt1;Gfpt;Gfpt1;Gfpt | T260  | 1         | 4             | VDSSTCLFPVEEK      | VDS(0.487)T(0.487)T(0.0) | VDS(ph)TCLFPVEEK                | FHA2 Rad53p    |                           |              | No         |                        |
| 1292 | IPI00127267 | Glycine dehydrogenase    | Gldc                  | S103  | 2         | 5             | TVPASIRLK          | T(1)VPAS(1)IRLK          | (ca)T(ph)VPAS(ph)IRLK           | CK1            |                           |              | Yes        |                        |
| 381  | IPI00123429 | Zinc finger protein GLI3 | Gli3;Gli3;Gli3        | S445  | 1         | 9             | IKPDEDLPSPGSR      | IKPDEDLPS(0.991)PGS(T)   | IKPDEDLPS(ph)PGSR               |                | 0.9                       | 0.19151      |            | Yes                    |
| 1308 | IPI00351252 | GMP synthase [glutam]    | Gmps                  | S332  | 1         | 7             | TLNMTTSPPEEK       | TLNMT(0.037)T(0.482)T    | TLNMTT(ph)SPEEK                 | CK2            |                           |              | No         |                        |
| 1313 | IPI00351252 | GMP synthase [glutam]    | Gmps                  | T331  | 1         | 6             | TLNMTTSPPEEK       | TLNMT(0.037)T(0.482)T    | TLNMTT(ph)SPEEK                 | CK2            |                           |              | No         |                        |
| 687  | IPI00762316 | Guanine nucleotide-bir   | Gnl1;Gna-rs1;Mmr1     | S51   | 1         | 8             | REEQTDSDSGSVTHHIR  | REEQT(0.004)DT(0.134)    | REEQTDTS(ph)DGSV                | CK2            | 1.2                       | 0.34563      |            | Yes                    |
| 781  | IPI00222461 | Guanine nucleotide-bir   | Gnl3;Ns;Gnl3;Ns       | S505  | 1         | 3             | ELSPQSTAGKPSDGS    | ELS(0.962)PEQS(0.018)    | ELS(ph)EQSTAGKPSD               | CAMK2          | 1.0                       | 0.38461      |            | No                     |
| 1338 | IPI00222461 | Guanine nucleotide-bir   | Gnl3;Ns;Gnl3;Ns       | S509  | 1         | 7             | ELSPQSTAGKPSDGS    | ELS(0.332)PEQS(0.332)    | ELS(ph)EQSTAGKPSD               | CK1            |                           |              | No         |                        |
| 1342 | IPI00222461 | Guanine nucleotide-bir   | Gnl3;Ns;Gnl3;Ns       | T510  | 1         | 8             | ELSPQSTAGKPSDGS    | ELS(0.332)PEQS(0.332)    | ELS(ph)EQSTAGKPSD               | GSSALDR        |                           |              | No         |                        |
| 453  | IPI00341196 | G patch domain-contai    | Gpatch8;Gpatch8;Kiaa0 | S1037 | 1         | 1             | SQSPHYFQSGR        | S(0.959)QS(0.041)PHYF    | S(ph)QSPHYFQSGR                 |                | 1.0                       | 0.23432      |            | Yes                    |
| 1049 | IPI00122054 | GPN-loop GTPase 1;XP     | Gpn1;Mbdin;Xab1       | S338  | 1         | 12            | GTLDDEEEDSDDTDI    | GTLDDEEEDS(0.989)        | GTLDDEEEDS(ph)D                 | DDDDIHR        | 1.1                       | 0.49838      |            | Yes                    |
| 271  | IPI00131457 | Probable G-protein cou   | Gpr124;Tem5           | S1104 | 1         | 10            | ALPTATEDGSPVLGEG   | ALPT(0.011)AT(0.014)E    | ALPTATEDGSPVLGEG                | CK1            | 0.9                       | 0.1066       |            | Yes                    |
| 902  | IPI00757356 | G-protein coupled rece   | Gpr98;Kiaa0686;Mass1  | T1994 | 1         | 14            | TRPLSVEEATQNVTL    | TRPLSVEEATQNV(T)0.95     | TRPLSVEEATQNV(T)ph              | FHA2 Rad53p    | 1.1                       | 0.44142      |            | Yes                    |
| 753  | IPI00750061 | Glycogen synthase kina   | Gsk3b;Gsk3a           | S215  | 1         | 6             | GEPNVSYICSR        | GEPNV(S)0.5Y(0.5)ICSR    | GEPNV(ph)YICSR                  | GSK3           | 1.2                       | 0.37348      |            | No                     |
| 1306 | IPI00750061 | Glycogen synthase kina   | Gsk3b;Gsk3a           | S219  | 1         | 10            | GEPNVSYICSR        | GEPNV(S)0.012Y(0.494)    | (ca)GEPNVSY(ph)ICSR             | CK1            |                           |              | No         |                        |
| 836  | IPI00750061 | Glycogen synthase kina   | Gsk3b;Gsk3a           | Y216  | 1         | 7             | GEPNVSYICSR        | GEPNV(S)0.002Y(0.998)    | GEPNVSY(ph)ICSR                 |                | 1.0                       | 0.40828      |            | Yes                    |
| 873  | IPI00114232 | Histone deacetylase 1    | Hdac1                 | S393  | 1         | 22            | MLPHAPGVQMQAIPED   | MLPHAPGVQMQAIPED         | (ca)MLPHAPGVQMQA                | CK2            | 1.1                       | 0.42684      |            | Yes                    |
| 1019 | IPI00313817 | Hepatoma-derived gro     | Hdgf;Tdrn1            | S165  | 1         | 9             | RAGDVLEDSPK        | RAGDVLEDS(1)PK           | RAGDVLEDS(ph)PK                 | CDK2           | 1.1                       | 0.48541      |            | Yes                    |
| 1040 | IPI00313817 | Hepatoma-derived gro     | Hdgf;Tdrn1            | S202  | 1         | 5             | NSTPSEPDGQPPAE     | NS(0.124)T(0.124)PS(0)   | NSTP(ph)EPDQGGP                 | CK1            | 1.1                       | 0.49115      |            | No                     |
| 557  | IPI00116442 | Hepatoma-derived gro     | Hdgfrp2;Hdgfrp2;Hdgfr | S629  | 1         | 8             | AQEDGQDSEDGPR      | AQEDGQD(S)1JEDGPR        | AQEDGQD(ph)JEDGPR               |                | 1.2                       | 0.27888      |            | Yes                    |
| 458  | IPI00123379 | Vigilin;High density lip | Hdlbp;Hdlbp           | S31   | 1         | 6             | VATLNSIEEENDPPTYK  | VATLNS(1)JEEENDPPTYK     | VATLNS(ph)JEEENDPPT             | CK2            | 1.0                       | 0.23743      |            | Yes                    |
| 690  | IPI00222813 | HIRA-interacting protei  | Hirip3                | S575  | 1         | 4             | TLDSEEEQPR         | T(0.006)LDS(0.994)EEE    | TLDS(ph)EEEQPR                  | CK2            | 1.0                       | 0.3463       |            | Yes                    |
| 331  | IPI00228616 | Histone H1.1;H1 VAR.3    | Hist1h1a;H1f1         | T15   | 1         | 14            | SETAPVAQAASTATEK   | S(0.009)ET(0.007)APVA    | SETAPVAQAASTAT(ph)CK1           |                | 0.9                       | 0.15312      |            | No                     |
| 581  | IPI00230133 | Histone H1.5;H1 VAR.5    | Hist1h1b;H1f5         | S2    | 1         | 11            | SETAPAEAAPAPVEK    | S(0.57)ET(0.43)APAETA    | S(ph)ETAPAEAAPAPVEK             |                | 1.0                       | 0.29111      |            | No                     |
| 561  | IPI00223713 | Histone H1.2;H1 VAR.4    | Hist1h1c;H1f2         | S2    | 1         | 1             | SEAAPAAPAAPAPAEK   | S(ph)EAAAPAAPAAPAEK      | SEAAPAAPAAPAPAEK                | CK2            | 1.0                       | 0.28197      |            | Yes                    |
| 829  | IPI00331597 | Histone H1.3;H1 VAR.4    | Hist1h1d;H1f3         | S2    | 1         | 1             | SETAPAAPAAPAPVEK   | S(0.946)ET(0.054)APAA    | S(ph)ETAPAAPAAPAPVEK            |                | 1.0                       | 0.40456      |            | Yes                    |
| 494  | IPI00223714 | Histone H1.4;H1 VAR.2    | Hist1h1e;H1f4         | S2    | 1         | 1             | SETAPAAPAAPAPVEK   | S(0.908)ET(0.092)APAA    | S(ph)ETAPAAPAAPAPAEK            |                | 1.0                       | 0.25447      |            | Yes                    |
| 787  | IPI00623776 | Histone H4               | Hist1h4a;Hist1h4b;H4- | S103  | 1         | 3             | RISGLIYEETR        | RIS(1)GLIYEETR           | RIS(ph)GLIYEETR                 | PKA            | 1.1                       | 0.38569      |            | Yes                    |
| 548  | IPI00624711 | High mobility group pr   | Hmga1;Hmgi;Hmgi;Hr    | S88   | 2         | 11            | KLEKEEEEIGISQESSE  | KLEKEEEEIGIS(0.761)QE    | KLEKEEEEIGIS(ph)QES             | GSK3           | 1.2                       | 0.27484      |            | No                     |
| 403  | IPI00624711 | High mobility group pr   | Hmga1;Hmgi;Hmgi;Hr    | S91   | 1         | 14            | KLEKEEEEIGISQESSE  | KLEKEEEEIGISQES(0.94)    | KLEKEEEEIGIS(ph)S               | CK2            | 1.3                       | 0.20876      |            | Yes                    |
| 233  | IPI00624711 | High mobility group pr   | Hmga1;Hmgi;Hmgi;Hr    | S92   | 2         | 15            | KLEKEEEEIGISQESSE  | KLEKEEEEIGISQES(1)S(1)   | KLEKEEEEIGISQES(ph)S            | CK2            | 1.4                       | 0.079098     |            | Yes                    |
| 459  | IPI00331612 | High mobility group pr   | Hmga2;Hmgic           | S104  | 1         | 14            | KPAQETTESQESAED    | KPAQETTESQES(0.001)Q     | KPAQETTESQES(ph)CK2             |                | 1.2                       | 0.23813      |            | Yes                    |
| 1013 | IPI00331612 | High mobility group pr   | Hmga2;Hmgic;Hmga2     | S44   | 1         | 11            | KQQQEPTCEPSPK      | KQQQEPTCEP(S)1PK         | KQQQEPTCEP(ph)PK                | CDK2           | 1.1                       | 0.48214      |            | Yes                    |
| 1398 | IPI00331707 | Hydroxymethylglutaryl    | Hmgcs1                | S486  | 1         | 18            | RPFTNDHSLDEGMGLV   | RPFT(0.053)NDHS(0.09)    | RPFTNDHSLDEGMGLV                | NEK6           |                           |              | No         |                        |
| 635  | IPI00331707 | Hydroxymethylglutaryl    | Hmgcs1                | S495  | 1         | 27            | RPFTNDHSLDEGMGLV   | RPFTNDHSLDEGMGLV         | RPFTNDHSLDEGMGLV                | CDK2           | 1.0                       | 0.31866      |            | Yes                    |
| 940  | IPI00338745 | Non-histone chromoso     | Hmgn1;Hmg-14;Hmg14    | S84   | 1         | 23            | QADVADQQTTELPAEN   | QADVADQQTTELPAEN         | (ca)QADVADQQTTEL                | CK1            | 1.1                       | 0.45309      |            | No                     |
| 667  | IPI00338745 | Non-histone chromoso     | Hmgn1;Hmg-14;Hmg14    | S87   | 1         | 26            | QADVADQQTTELPAEN   | QADVADQQTTELPAEN         | QADVADQQTTELPAEN                | CK2            | 1.2                       | 0.33864      |            | Yes                    |
| 128  | IPI00338745 | Non-histone chromoso     | Hmgn1;Hmg-14;Hmg14    | T70   | 2         | 9             | QADVADQQTTELPAEN   | QADVADQQT(0.512)T(0)     | QADVADQQT(ph)TEL                | FHA2 Rad53p    | 1.6                       | 0.010135     | Up         | No                     |
| 129  | IPI00338745 | Non-histone chromoso     | Hmgn1;Hmg-14;Hmg14    | T71   | 2         | 10            | QADVADQQTTELPAEN   | QADVADQQT(0.512)T(0)     | QADVADQQT(ph)TELPAEN            | ENQ(S)ph)PASE1 | 1.6                       | 0.010135     | Up         | No                     |
| 1270 | IPI00338745 | Non-histone chromoso     | Hmgn1;Hmg-14;Hmg14    | T80   | 2         | 19            | QADVADQQTTELPAEN   | QADVADQQT(0.408)T(0)     | (ca)QADVADQQT(ph)TELPAEN        | ENQ(S)ph)PASE1 | 1.6                       | 0.010135     | Up         | No                     |
| 782  | IPI00553777 | Heterogeneous nuclear    | Hnrnpa1;Fli-2;Hnrpa1; | S4    | 1         | 1             | SESPKPEQLR         | S(0.976)ES(0.024)PKPE    | S(ph)ESPKPEQLR                  |                | 1.1                       | 0.38498      |            | Yes                    |
| 793  | IPI00553777 | Heterogeneous nuclear    | Hnrnpa1;Fli-2;Hnrpa1; | S6    | 1         | 3             | SESPKPEQLR         | S(0.002)ES(0.998)PKPE    | SES(ph)PKPEQLR                  | CDK1           | 1.0                       | 0.38734      |            | Yes                    |
| 1015 | IPI00269661 | Heterogeneous nuclear    | Hnrnpa3;Hnrpa3;Hnrnp  | Y361  | 1         | 6             | SSGSPYGGYSGGGGSG   | S(0.011)S(0.007)GS(0.0)  | SSGSPY(ph)GGYSGGGGSG            | YGSR           | 1.1                       | 0.48312      |            | Yes                    |
| 649  | IPI00874321 | Heterogeneous nuclear    | Hnrnpc;Hnrpc;Hnrnpc;  | S306  | 1         | 15            | DDEKEPEEGEDDRDSAN  | DDEKEPEEGEDDRDS(0)       | DDEKEPEEGEDDRDS(ph)PKA          |                | 1.2                       | 0.32698      |            | Yes                    |
| 303  | IPI00874321 | Heterogeneous nuclear    | Hnrnpc;Hnrpc;Hnrnpc;  | S313  | 1         | 22            | DDEKEPEEGEDDRDSAN  | DDEKEPEEGEDDRDS(0)       | DDEKEPEEGEDDRDS(ph)ANGEDDS      |                | 0.9                       | 0.13065      |            | No                     |
| 693  | IPI00874321 | Heterogeneous nuclear    | Hnrnpc;Hnrpc;Hnrnpc;  | S241  | 1         | 4             | NEKSEEEQSSASVK     | NEKS(1)JEEEQSSASVK       | NEKS(ph)JEEEQSSASVK             | CK2            | 1.0                       | 0.34762      |            | Yes                    |
| 572  | IPI00874321 | Heterogeneous nuclear    | Hnrnpc;Hnrpc;Hnrnpc;  | S268  | 1         | 10            | MESEAGADDSAEEDLL   | MESEAGADDS(1)AEEGI       | M(ox)ESEAGADDS(ph)CK2           |                | 1.0                       | 0.28671      |            | Yes                    |
| 1368 | IPI00330958 | Heterogeneous nuclear    | Hnrnpd;Auf1;Hnrpd;Hr  | S80   | 1         | 13            | IDASKNEEDEGHNSSPR  | IDAS(0.002)KNEEDEGH      | IDASKNEEDEGHNSSPR               |                |                           |              | No         |                        |
| 724  | IPI00330958 | Heterogeneous nuclear    | Hnrnpd;Auf1;Hnrpd;Hr  | S82   | 1         | 15            | IDASKNEEDEGHNSSPR  | IDAS(0.001)KNEEDEGH      | (ca)IDASKNEEDEGHNS              | (ph)SPR        | 1.2                       | 0.35951      |            | Yes                    |
| 607  | IPI00330958 | Heterogeneous nuclear    | Hnrnpd;Auf1;Hnrpd;Hr  | S83   | 1         | 16            | IDASKNEEDEGHNSSPR  | IDASKNEEDEGHNS(0.006)    | IDASKNEEDEGHNS(S)Polo box       |                | 1.2                       | 0.30502      |            | Yes                    |
| 338  | IPI00224729 | Heterogeneous nuclear    | Hnrnp2;Hnrp2;Hnrnp    | S104  | 1         | 6             | HTGPNSPDTANDGFR    | HTGPN(S)0.995PDT(0.0)    | HTGPN(ph)PDTANDG                | WW GroupIV     | 1.3                       | 0.16125      |            | Yes                    |
| 261  | IPI00224729 | Heterogeneous nuclear    | Hnrnp2;Hnrp2;Hnrnp    | T107  | 1         | 9             | HTGPNSPDTANDGFR    | HTGPN(S)0.006PDT(0.9)    | HTGPNPDT(ph)ANDG                | FHA1 Rad53p    | 1.4                       | 0.10104      |            | Yes                    |
| 382  | IPI00224575 | Heterogeneous nuclear    | Hnrnpk;Hnrpk;Hnrpk;   | S116  | 1         | 14            | KIIPTEELGLQLPSPATS | KIIPTEELGLQLP(S)0.95P    | KIIPTEELGLQLP(ph)PATS           | QLPLESDA       | 1.3                       | 0.19329      |            | Yes                    |
| 1374 | IPI00224575 | Heterogeneous nuclear    | Hnrnpk;Hnrpk;Hnrpk;   | T118  | 1         | 16            | KIIPTEELGLQLPSPATS | KIIP(T)0.093LEELGLQLP    | KIIPTEELGLQLP(ph)P              | FHA KAPP       |                           |              | No         |                        |
| 1376 | IPI00224575 | Heterogeneous nuclear    | Hnrnpk;Hnrpk;Hnrpk;   | T120  | 1         | 18            | KIIPTEELGLQLPSPATS | KIIP(T)0.001LEELGLQLP    | KIIPTEELGLQLPSPAT               | FHA2 Rad53p    |                           |              | No         |                        |
| 890  | IPI00224575 | Heterogeneous nuclear    | Hnrnpk;Hnrpk;Hnrpk;   | S284  | 1         | 6             | DYDDMSIPR          | DYDDMS(1)PR              | DYDDMS(ph)PR                    | CDK2           | 1.1                       | 0.43322      |            | Yes                    |
| 1381 | IPI00224575 | Heterogeneous nuclear    | Hnrnpk;Hnrpk;Hnrpk;   | T13   | 1         | 13            | METEPEETFPNTEG     | MET(0.229)EQPEET(0.2)    | M(ox)ETEPEETFPNT                | (ph)ETNGEFGK   |                           |              | No         |                        |
| 1383 | IPI00224575 | Heterogeneous nuclear    | Hnrnpk;Hnrpk;Hnrpk;   | T15   | 1         | 15            | METEPEETFPNTEG     | MET(0.229)EQPEET(0.2)    | M(ox)ETEPEETFPNT                | CK2            |                           |              | No         |                        |

| No   | IPI Numbers | Protein Names             | Gene Names               | pAA   | Number of P | Position in p | Peptide Sequence    | Phospho (STY) Probabi   | Modified Sequence          | Best Motif        | Ratio <sup>1</sup> of Phd | Ratio Signifid | Up-/Down-r | Localized phosphosite? |
|------|-------------|---------------------------|--------------------------|-------|-------------|---------------|---------------------|-------------------------|----------------------------|-------------------|---------------------------|----------------|------------|------------------------|
| 871  | IPI00224575 | Heterogeneous nuclear     | Hnrnpk;Hnrpk;Hnrnpk;     | T3    | 1           | 3             | METEQQEETFPNTETNG   | MET(0.997)EQPEET(0.0)   | MET(ph)EQPEETFPNTETNGEFGK  |                   | 1.1                       | 0.42591        |            | Yes                    |
| 735  | IPI00458583 | Heterogeneous nuclear     | Hnrnpu;Hnrpu;hnrnp       | S247  | 1           | 3             | AKSPQPVVEEEDHFD     | AKS(1)PQPPVEEEDHFD      | AKS(ph)PQPPVEEEDHFD        | CAMK2             | 1.2                       | 0.36592        |            | Yes                    |
| 481  | IPI00458583 | Heterogeneous nuclear     | Hnrnpu;Hnrpu;hnrnp       | T262  | 1           | 18            | AKSPQPVVEEEDHFD     | AKS(0.268)PQPPVEEED     | AKSPQPVVEEEDHFD            | PLK1              | 1.2                       | 0.24776        |            | No                     |
| 758  | IPI00458583 | Heterogeneous nuclear     | Hnrnpu;Hnrpu;hnrnp       | T268  | 1           | 24            | AKSPQPVVEEEDHFD     | AKS(0.039)PQPPVEEED     | AKSPQPVVEEEDHFD            | YVCLDT(ph)YVCLDHF | 1.2                       | 0.37512        |            | Yes                    |
| 697  | IPI00123501 | Heterogeneous nuclear     | Hnrnpul1;Hnrnpul1;Hnr    | S195  | 1           | 3             | GRSPQPAEEDDDDF      | GRS(1)PQPAEEDDDDF       | GRS(ph)PQPAEEDDD           | CAMK2             | 1.2                       | 0.34868        |            | Yes                    |
| 966  | IPI00123501 | Heterogeneous nuclear     | Hnrnpul1;Hnrnpul1;Hnr    | T210  | 1           | 19            | GRSPQPAEEDDDDF      | GRS(0.287)PQPAEED       | GRSPQPAEEDDDDF             | PLK1              | 1.1                       | 0.46176        |            | No                     |
| 399  | IPI00123501 | Heterogeneous nuclear     | Hnrnpul1;Hnrnpul1;Hnr    | T216  | 1           | 25            | GRSPQPAEEDDDDF      | GRS(0.075)PQPAEED       | GRSPQPAEEDDDDF             | YVCLDT(ph)YVCLDHF | 0.9                       | 0.20481        |            | No                     |
| 614  | IPI00123501 | Heterogeneous nuclear     | Hnrnpul1;Hnrnpul1;Hnr    | Y217  | 1           | 26            | GRSPQPAEEDDDDF      | GRS(0.176)PQPAEED       | GRSPQPAEEDDDDF             | EGFR              | 1.2                       | 0.30668        |            | No                     |
| 531  | IPI00849047 | Heterogeneous nuclear     | Hnrnpul2;Hnrnpul2;Mar    | S224  | 1           | 1             | SKSPPPPEEAKDEEEDQ   | S(0.552)KS(0.448)PPPP   | S(ph)SKSPPPPEEAKDEEEDQ     | TLVNLDTYSDLHF     | 1.2                       | 0.26768        |            | No                     |
| 1388 | IPI00849047 | Heterogeneous nuclear     | Hnrnpul2;Hnrnpul2;Mar    | S251  | 1           | 28            | SKSPPPPEEAKDEEEDQ   | S(0.103)KS(0.105)PPPP   | SKSPPPPEEAKDEEEDQ          | TLVNLDTYSDLHF     | 1.2                       | 0.26768        |            | No                     |
| 1389 | IPI00849047 | Heterogeneous nuclear     | Hnrnpul2;Hnrnpul2;Mar    | S258  | 1           | 35            | SKSPPPPEEAKDEEEDQ   | S(0.156)KS(0.151)PPPP   | SKSPPPPEEAKDEEEDQ          | TLVNLDTYSDLHF     | 1.2                       | 0.26768        |            | No                     |
| 1390 | IPI00849047 | Heterogeneous nuclear     | Hnrnpul2;Hnrnpul2;Mar    | T250  | 1           | 27            | SKSPPPPEEAKDEEEDQ   | S(0.071)KS(0.071)PPPP   | SKSPPPPEEAKDEEEDQ          | FHA2 Rad53p       | 1.2                       | 0.26768        |            | No                     |
| 1006 | IPI00849047 | Heterogeneous nuclear     | Hnrnpul2;Hnrnpul2;Mar    | S159  | 1           | 1             | SGDETPGSEAPGDK      | S(1)GDETPGSEAPGDK       | S(ph)GDETPGSEAPGDK         | CK2               | 1.1                       | 0.47987        |            | Yes                    |
| 130  | IPI00849047 | Heterogeneous nuclear     | Hnrnpul2;Hnrnpul2;Mar    | T163  | 1           | 5             | SGDETPGSEAPGDK      | S(0.023)GDETP(0.861)PG  | SGDETP(ph)GSEAPGDK         | FHA KAPP          | 0.7                       | 0.010421       | Down       | Yes                    |
| 956  | IPI00121760 | Heterogeneous nuclear     | Hnrpl1;Hnrpl1            | S37   | 1           | 11            | LKTEEGEIVYSAEESNR   | LKTEEGEIVY(0.01)S(0.9)  | LKTEEGEIVY(ph)AEESCK2      | CK2               | 1.1                       | 0.45814        |            | Yes                    |
| 720  | IPI00330804 | Heat shock protein Hsp    | Hsp90aa1;Hsp86;Hsp8      | S263  | 1           | 13            | ESDDKPEIEDVGSDEE    | ESDDKPEIEDVGS(1)DEE     | ESDDKPEIEDVGS(ph)DCK2      | CK2               | 1.2                       | 0.35851        |            | Yes                    |
| 841  | IPI00229080 | Heat shock protein 84b    | Hsp90ab1;Hsp84b;Hsp      | S255  | 1           | 6             | IEDVGSDEEDDSGDKK    | IEDVGS(1)DEEDDSGDK      | IEDVGS(ph)DEEDDSGDK        | CK2               | 1.0                       | 0.40961        |            | Yes                    |
| 928  | IPI00229080 | Heat shock protein 84b    | Hsp90ab1;Hsp84b;Hsp      | S261  | 1           | 12            | IEDVGSDEEDDSGDKK    | IEDVGS(0.175)DEEDDS     | IEDVGSDEEDDS(ph)GDKDK      | CK2               | 1.1                       | 0.4481         |            | Yes                    |
| 814  | IPI00123802 | Heat shock protein 105    | Hsp11;Hsp105;Hsp110      | S810  | 1           | 3             | IESPFLER            | IES(1)PKLER             | IES(ph)PKLER               | CDK1              | 1.0                       | 0.39802        |            | Yes                    |
| 670  | IPI00221566 | HIV Tat-specific factor   | Htatsf1                  | S724  | 1           | 5             | LFDDSDER            | LFDDSDER                | LFDDSDER                   | CDK1              | 1.0                       | 0.34036        |            | Yes                    |
| 678  | IPI00463909 | E3 ubiquitin-protein lig  | Huwe1;Kiaa0312;Urb       | S1395 | 1           | 3             | AESPEEVACR          | AES(1)PEEVACR           | AES(ph)PEEVACR             | CAMK2             | 1.2                       | 0.34139        |            | Yes                    |
| 903  | IPI00463909 | E3 ubiquitin-protein lig  | Huwe1;Kiaa0312;Urb       | S1907 | 1           | 6             | GSSTASDDEFENLR      | GS(0.011)GT(0.011)AS    | GSSTAS(ph)DDEFENLR         | CK2               | 1.1                       | 0.44152        |            | Yes                    |
| 1400 | IPI00761863 | Insulin-like growth fact  | Igf2bp2;Imp2;Vickz2;I    | S161  | 1           | 10            | ISYIPDEEVSSPSPHHR   | IS(0.003)Y(0.008)PDEE   | ISYIPDEEVSSPSPHHR          | ERK/MAPK          | 1.1                       | 0.47798        |            | No                     |
| 1001 | IPI00761863 | Insulin-like growth fact  | Igf2bp2;Imp2;Vickz2;I    | S162  | 1           | 11            | ISYIPDEEVSSPSPHHR   | ISYIPDEEVSSPSPHHR       | ISYIPDEEVSSPSPHHR          | ERK/MAPK          | 1.1                       | 0.47798        |            | No                     |
| 850  | IPI00761863 | Insulin-like growth fact  | Igf2bp2;Imp2;Vickz2;I    | S164  | 1           | 13            | ISYIPDEEVSSPSPHHR   | ISYIPDEEVSSPSPHHR       | ISYIPDEEVSSPSPHHR          | ERK/MAPK          | 1.1                       | 0.41352        |            | Yes                    |
| 737  | IPI00331315 | Insulin-like growth fact  | Igf2bp3;Vickz3           | S165  | 1           | 15            | VAYIPDETAQQNPSPQ    | VAYIPDETAQQNPSP(1)      | VAYIPDETAQQNPSP(ph)PQLR    | CK2               | 1.0                       | 0.36621        |            | Yes                    |
| 582  | IPI00308971 | Cation-independent m      | Igf2r                    | S2401 | 1           | 14            | AEALSSLHGDDQDSEDE   | AEALSSLHGDDQDSEDE       | AEALSSLHGDDQDSEDE          | CK2               | 1.0                       | 0.2913         |            | Yes                    |
| 1356 | IPI00308971 | Cation-independent m      | Igf2r                    | S2476 | 1           | 8             | LVSFHDSDDEDLHI      | LVSFHDSDDEDLHI          | (ca)LVSFHDSDDEDLHI         | CK2               | 1.0                       | 0.2913         |            | Yes                    |
| 1358 | IPI00308971 | Cation-independent m      | Igf2r                    | T2407 | 1           | 20            | AEALSSLHGDDQDSEDE   | AEALS(0.002)S(0.014)LE  | AEALSSLHGDDQDSEDE          | CK2               | 1.0                       | 0.2913         |            | No                     |
| 224  | IPI00120155 | Interleukin-6 receptor    | Il6st                    | S665  | 1           | 7             | SHIAQWSPHTPPR       | SHIAQWS(0.991)PHT(0.0)  | SHIAQWS(ph)PHTPPR          | CK2               | 0.8                       | 0.070977       |            | Yes                    |
| 1010 | IPI00319956 | Protein IMPACT;Impr       | Impact                   | S137  | 1           | 2             | TEEVEVEEEDDPILEHPP  | TEEVEVES(1)EEDDPILEH    | TEEVEVES(ph)EEDDPILEHPP    | PKA               | 1.1                       | 0.48116        |            | Yes                    |
| 866  | IPI00319956 | Protein IMPACT;Impr       | Impact                   | T130  | 1           | 8             | KTEEVEVEEEDDPILEHPP | KT(0.5)EEVEVES(0.5)E    | KT(ph)EEVEVEEEDDPILEHPP    | PKA               | 1.1                       | 0.42239        |            | No                     |
| 750  | IPI00896646 | Tyrosine-protein kinase   | Insr;mcg_3075;Insr;      | S989  | 1           | 6             | ELGQGSFGMVYEGLAR    | ELGQGS(0.5)FGMVY(0.0)   | (ca)ELGQGS(ph)FGMVYEGLAR   | CK2               | 1.0                       | 0.37209        |            | No                     |
| 751  | IPI00896646 | Tyrosine-protein kinase   | Insr;mcg_3075;Insr;      | Y994  | 1           | 11            | ELGQGSFGMVYEGLAR    | ELGQGS(0.5)FGMVY(0.0)   | (ca)ELGQGS(ph)FGMVYEGLAR   | CK2               | 1.0                       | 0.37209        |            | No                     |
| 411  | IPI00453578 | Interferon regulatory f   | Irf2bp1;Irf2bp1          | S384  | 1           | 3             | KASPEPEGETAGK       | KAS(0.997)PEPEGET(0.0)  | KAS(ph)PEPEGETAGK          | PKA/AKT           | 1.3                       | 0.21337        |            | Yes                    |
| 1029 | IPI00453578 | Interferon regulatory f   | Irf2bp1;Irf2bp1          | S436  | 1           | 9             | NVAEALGHSPKDPGGG    | NVAEALGH(1)PKDPGG       | NVAEALGH(ph)PKDPGG         | CDK1              | 1.1                       | 0.48864        |            | Yes                    |
| 982  | IPI00854942 | Putative uncharacterize   | Irf2bp2                  | S362  | 1           | 11            | LEEPELNRQSPNPR      | LEEPELNRQSPNPR          | LEEPELNRQSPNPR             | PKA               | 1.1                       | 0.4681         |            | Yes                    |
| 1327 | IPI00854942 | Putative uncharacterize   | Irf2bp2                  | S419  | 1           | 4             | RPASVSSAAAEHEAR     | RPAS(0.462)VS(0.462)S   | RPAS(ph)VSSAAAEHEAR        | CAMK2             | 1.0                       | 0.4681         |            | No                     |
| 1329 | IPI00854942 | Putative uncharacterize   | Irf2bp2                  | S421  | 1           | 6             | RPASVSSAAAEHEAR     | RPAS(0.462)VS(0.462)S   | RPAS(ph)VSSAAAEHEAR        | CK2               | 1.0                       | 0.4681         |            | No                     |
| 892  | IPI00854942 | Putative uncharacterize   | Irf2bp2                  | S536  | 1           | 4             | RKPSPEPEGEVGGPK     | RKPS(1)PEPEGEVGGPK      | RKPS(ph)PEPEGEVGGPK        | PKA/AKT           | 1.1                       | 0.43479        |            | Yes                    |
| 311  | IPI00119627 | Insulin receptor substr   | Irs1;Irs-1;Irs1;mcg_20   | S1097 | 1           | 3             | HSETFSAPTR          | HS(0.004)S(0.996)ETFS   | HSS(ph)ETFSAPTR            | PIM1/2            | 0.9                       | 0.13779        |            | Yes                    |
| 190  | IPI00923679 | Insulin receptor substr   | Irs2;Irs2                | S556  | 1           | 3             | RVSGDGAQDLDR        | RVS(1)GDGAQDLDR         | RVS(ph)GDGAQDLDR           | PKA               | 1.5                       | 0.048389       | Up         | Yes                    |
| 125  | IPI00137400 | Inositol 1,4,5-trisphosp  | Itp3                     | S934  | 1           | 3             | KQSVFGASSLPAGVGVY   | KQS(0.714)VFGAS(0.14)   | KQS(ph)VFGASSLPAGVGVY      | CAMK2             | 1.7                       | 0.0084638      | Up         | No                     |
| 963  | IPI00831223 | Intersectin-1;EH and S    | Itns1;Ese1;Itns1;Itns1;E | S334  | 1           | 6             | LPEEPSSEDEQQPEK     | LPEEPS(0.886)S(0.114)   | LPEEPS(ph)SEDEQQPEK        | CK2               | 1.1                       | 0.46033        |            | Yes                    |
| 348  | IPI00831223 | Intersectin-1;EH and S    | Itns1;Ese1;Itns1;Itns1;E | S335  | 1           | 7             | LPEEPSSEDEQQPEK     | LPEEPS(0.113)S(0.887)   | LPEEPS(ph)SEDEQQPEK        | CK2               | 0.9                       | 0.16673        |            | Yes                    |
| 818  | IPI00876351 | potassium channel tetr    | Kctd18                   | S349  | 1           | 17            | AAQCSVATGASGHAPAS   | AAQCSVATGAS(0.002)K     | AAQCSVATGASGHAPAS          | WW GroupIV        | 1.1                       | 0.39934        |            | Yes                    |
| 367  | IPI00464324 | Uncharacterized protei    | Kiaa0754                 | S275  | 1           | 5             | EKTESELKFEEDER      | EKT(0.119)ES(0.881)EL   | EKTES(ph)ELKFEEDER         | CK2               | 1.3                       | 0.18108        |            | Yes                    |
| 73   | IPI00454081 | Kinesin-like protein KIF  | Kif21a;Kiaa1708;Kif21a   | S855  | 1           | 3             | KLSSESAPADTGGSSAAS  | KLS(0.97)S(0.026)S(0.0) | KLS(ph)SSESAPADTGGSSAAS    | PKA               | 2.1                       | 8.458E-05      | Up         | Yes                    |
| 434  | IPI00120089 | Kinesin light chain 4;Kir | Klc4;Kns18               | S590  | 1           | 3             | AASLNLYNQPNAAAPLQV  | AA(0.999)LN(0.001)LP    | AAS(ph)LNLYNQPNAAAPLQV     | PKA               | 1.0                       | 0.2274         |            | Yes                    |
| 918  | IPI00230429 | Importin subunit alpha    | Kpna3;Oip2;Kpna3         | S60   | 1           | 11            | NVPOQESLEDSVDADDF   | NVPOQESLEDS(1)DVDA      | NVPOQESLEDS(ph)DVDA        | NEK6              | 1.1                       | 0.44648        |            | Yes                    |
| 594  | IPI00129792 | Importin subunit alpha    | Kpna4;Oip1               | S60   | 1           | 11            | NVPOQEDICEDSDIDGDYR | NVPOQEDICEDS(1)DIDG     | NVPOQEDICEDS(ph)DIDGDYR    | CK2               | 1.0                       | 0.29583        |            | Yes                    |
| 739  | IPI00311761 | Protein KRI1 homolog      | Kri1                     | S148  | 1           | 7             | YVDEDNSDGETVDHR     | YVDEDNS(0.953)DGET      | YVDEDNS(ph)DGETVDHR        | CK2               | 1.2                       | 0.36726        |            | Yes                    |
| 364  | IPI00623208 | Kinase suppressor of R    | Ksr1;Ksr;Ksr1;Ksr;Ksr1;  | S518  | 1           | 19            | TDVLGVHEAEAEPEAG    | TDVLGVHEAEAEPEAG        | TDVLGVHEAEAEPEAG           | CK2               | 0.9                       | 0.17871        |            | Yes                    |
| 855  | IPI00122559 | Kinectin;Kinectin;Kine    | Ktn1;Ktn1;Ktn1;Ktn1;K    | S75   | 1           | 10            | EIQNGTLRESDESHPVPR  | EIQNGT(0.002)LR(0.9)S   | EIQNGTLRES(ph)DSEH         | PKA               | 1.1                       | 0.41931        |            | Yes                    |
| 1165 | IPI00929786 | La-related protein 1;La   | Larp1;Kiaa0731;Larp      | S298  | 1           | 12            | VEPAWHDDQDTSVSKSD   | VEPAWHDDQDET(0.059)     | VEPAWHDDQDTS(ph)GSK3       | CK2               | 1.0                       | 0.37197        |            | No                     |
| 1169 | IPI00929786 | La-related protein 1;La   | Larp1;Kiaa0731;Larp      | S299  | 1           | 13            | VEPAWHDDQDTSVSKSD   | VEPAWHDDQDET(0.168)     | VEPAWHDDQDTS(ph)VKSDGAGGAR | CK2               | 1.0                       | 0.37197        |            | Yes                    |
| 1174 | IPI00929786 | La-related protein 1;La   | Larp1;Kiaa0731;Larp      | S302  | 1           | 16            | VEPAWHDDQDTSVSKSD   | VEPAWHDDQDET(0.059)     | VEPAWHDDQDTS(ph)GSK3       | CK2               | 1.0                       | 0.37197        |            | No                     |
| 679  | IPI00929786 | La-related protein 1;La   | Larp1;Kiaa0731;Larp      | S525  | 1           | 5             | GLSASLPDLDESSEWIEVK | GLS(0.113)AS(0.886)LP   | GLSAS(ph)LPDLDESSEWIEVK    | NEK6              | 1.0                       | 0.34169        |            | Yes                    |
| 733  | IPI00929786 | La-related protein 1;La   | Larp1;Kiaa0731;Larp      | S751  | 1           | 9             | SLPTTVPEPSPNYR      | SLPTTVPEPSPNYR          | SLPTTVPEPSPNYR             | ERK/MAPK          | 1.0                       | 0.36309        |            | Yes                    |
| 749  | IPI00929786 | La-related protein 1;La   | Larp1;Kiaa0731;Larp      | S81   | 1           | 15            | ESPRPPAAAEEAPAGSDG  | ESPRPPAAAEEAPAGS(1)     | ESPRPPAAAEEAPAGS(ph)CK2    | CK2               | 1.0                       | 0.37197        |            | Yes                    |
| 859  | IPI00929786 | La-related protein 1;La   | Larp1;Kiaa0731;Larp      | T626  | 1           | 7             | ILIVTQTPPYMR        | ILIVTQ(0.997)PPY(0.0)   | ILIVTQ(ph)PPY(ox)R         | CK2               | 1.1                       | 0.42052        |            | Yes                    |
| 1177 | IPI00929786 | La-related protein 1;La   | Larp1;Kiaa0731;Larp      | Y754  | 1           | 12            | SLPTTVPEPSPNYR      | SLPTT(0.003)VPES(0.49)  | SLPTTVPEPSPNYR             | CK2               | 1.0                       | 0.37197        |            | No                     |
| 144  | IPI00340860 | La-related protein 7;La   | Larp7;D3Wsu161e          | T251  | 1           | 1             | TASEGSEAEETPEAPK    | T(0.613)AS(0.383)EGS    | T(ph)ASEGSEAEETPEAPK       | PKA               | 1.6                       | 0.016033       | Up         | No                     |
| 616  | IPI00474486 | RNA polymerase-assoc      | Leo1;Gm185               | S631  | 1           | 4             | KLNSDEEGESSGK       | KLNS(1)DEEGESSGK        | KLNS(ph)DEEGESSGK          | CK2               | 1.2                       | 0.30911        |            | Yes                    |
| 588  | IPI00474486 | RNA polymerase-assoc      | Leo1;Gm185               | S659  | 1           | 5             | KYVISDEEEEDD        | KY(0.003)VIS(0.997)DE   | KYVIS(ph)DEEEEDD           | CK2               | 1.2                       | 0.29372        |            | Yes                    |
| 516  | IPI00229517 | Galectin-1;Lectin galact  | Lgals1;Gbp               | S8    | 1           | 7             | ACGLVASNLNLKPGCE    | ACGLVAS(1)NLNLKPGCE     | ACGLVAS(ph)NLNLKPGCE       | NEK6              | 1.0                       | 0.2633         |            | Yes                    |

| No   | IPI Numbers | Protein Names           | Gene Names           | pAA   | Number of P | Position in p | Peptide Sequence   | Phospho (STY) Probabi  | Modified Sequence      | Best Motif       | Ratio <sup>1</sup> of Phd | Ratio Signif | Up-/Down-r | Localized phosphosite? |
|------|-------------|-------------------------|----------------------|-------|-------------|---------------|--------------------|------------------------|------------------------|------------------|---------------------------|--------------|------------|------------------------|
| 223  | IPI00112339 | LIM domain and actin-   | Lima1;D15ErtD366e;Ep | S225  | 1           | 3             | RLSENNCLDDWEIGAG   | RLS(0.985)ENNCS(0.01)  | RLS(ph)ENNCSLDDWEI     | PKA              | 1.4                       | 0.070318     |            | Yes                    |
| 185  | IPI00112339 | LIM domain and actin-   | Lima1;D15ErtD366e;Ep | S230  | 1           | 8             | RLSENNCLDDWEIGAG   | RLS(0.046)ENNCS(0.95)  | RLSENNCS(ph)LDDWEI     | GAGHLSAAFNSEK    | 1.5                       | 0.044672     | Up         | Yes                    |
| 1045 | IPI00112339 | LIM domain and actin-   | Lima1;D15ErtD366e;Ep | S360  | 1           | 13            | SEAAQPMHPKPLSPDAR  | SEAQPMHPKPLS(1)PG      | SEAQPMHPKPLS(ph)       | WW GroupIV       | 1.1                       | 0.49473      |            | Yes                    |
| 943  | IPI00112339 | LIM domain and actin-   | Lima1;D15ErtD366e;Ep | S485  | 1           | 19            | SDNEETLGRPAQPPNAG  | SDNEETLGRPAQPPNAG      | SDNEETLGRPAQPPNAG      | (ph)PHSPGVEDAPIA | 1.1                       | 0.45436      |            | No                     |
| 981  | IPI00112339 | LIM domain and actin-   | Lima1;D15ErtD366e;Ep | S488  | 1           | 22            | SDNEETLGRPAQPPNAG  | SDNEETLGRPAQPPNAG      | SDNEETLGRPAQPPNA       | WW GroupIV       | 1.1                       | 0.4678       |            | Yes                    |
| 1225 | IPI00112339 | LIM domain and actin-   | Lima1;D15ErtD366e;Ep | T472  | 1           | 6             | SDNEETLGRPAQPPNAG  | S(0.208)DNEET(0.412)   | SDNEETLGRPAQPP         | PLK1             |                           |              |            | No                     |
| 1251 | IPI00620256 | Lamin-A/C               | Lmna;Lmn1            | S570  | 1           | 2             | GSHCSGSGDPAEYNLR   | GS(0.454)HCS(0.454)GS  | (ca)GS(ph)HCSGSGDP     | PKA              |                           |              |            | No                     |
| 504  | IPI00620256 | Lamin-A/C               | Lmna;Lmn1            | S573  | 1           | 5             | GSHCSGSGDPAEYNLR   | GS(0.005)HCS(0.995)GS  | GSHCS(ph)GSGDPAEY      | CK1              | 1.0                       | 0.25889      |            | Yes                    |
| 1255 | IPI00620256 | Lamin-A/C               | Lmna;Lmn1            | S575  | 1           | 7             | GSHCSGSGDPAEYNLR   | GS(0.333)HCS(0.333)GS  | GS(ph)HCSGSGDPAEY      | NLR              |                           |              |            | No                     |
| 552  | IPI00620256 | Lamin-A/C               | Lmna;Lmn1            | S629  | 1           | 1             | SVGGSGGSGFDNLVTR   | S(0.925)VGG(0.073)GS   | S(ph)VGGSGGSGFDN       | CK1              | 1.0                       | 0.27809      |            | Yes                    |
| 344  | IPI00620256 | Lamin-A/C               | Lmna;Lmn1            | S633  | 1           | 5             | SVGGSGGSGFDNLVTR   | S(0.021)VGG(0.979)GS   | SVGGSG(ph)GGSGFDN      | GSK3             | 0.9                       | 0.16454      |            | Yes                    |
| 688  | IPI00620256 | Lamin-A/C               | Lmna;Lmn1            | T548  | 1           | 3             | SLTMVEDNEDDDEGEE   | S(0.15)LT(0.85)IMVEDN  | SLT(ph)IMVEDNEDDDE     | CHK1/2           | 1.2                       | 0.34584      |            | Yes                    |
| 1293 | IPI00620256 | Lamin-A/C;Lamin-A/C     | Lmna;Lmn1;Lmna;Lmn   | S17   | 1           | 6             | SGAQASSTPLSPTR     | S(0.001)GAQAS(0.333)P  | SGAQAS(ph)STPLSPTR     |                  |                           |              |            | No                     |
| 335  | IPI00620256 | Lamin-A/C;Lamin-A/C     | Lmna;Lmn1;Lmna;Lmn   | S18   | 1           | 7             | SGAQASSTPLSPTR     | SGAQAS(0.004)S(0.936)  | SGAQAS(ph)TPLSPTR      | GSK3             | 0.9                       | 0.15599      |            | Yes                    |
| 519  | IPI00620256 | Lamin-A/C;Lamin-A/C     | Lmna;Lmn1;Lmna;Lmn   | S22   | 1           | 11            | SGAQASSTPLSPTR     | SGAQASSTPLS(0.994)P    | SGAQASSTPLS(ph)PTR     | WW GroupIV       | 1.2                       | 0.26362      |            | Yes                    |
| 792  | IPI00400300 | Lamin-A/C;Lamin-A/C     | Lmna;Lmn1;Lmna;Lmn   | S570  | 1           | 25            | SLTMVEDNEDDDEGEE   | SLTMVEDNEDDDEGEE       | SLTMVEDNEDDDEGEE       | PKA              | 1.0                       | 0.38726      |            | Yes                    |
| 692  | IPI00400300 | Lamin-A/C;Lamin-A/C     | Lmna;Lmn1;Lmna;Lmn   | S572  | 1           | 27            | SLTMVEDNEDDDEGEE   | SLTMVEDNEDDDEGEE       | SLTM(ox)VEDNEDDDEGEE   | LLHHRV5(ph)GSF   | 1.0                       | 0.34709      |            | No                     |
| 218  | IPI00620256 | Lamin-A/C;Lamin-A/C     | Lmna;Lmn1;Lmna;Lmn   | T19   | 1           | 8             | SGAQASSTPLSPTR     | S(0.001)GAQAS(0.019)P  | SGAQASST(ph)PLSPTR     | Polo box         | 0.8                       | 0.065483     |            | Yes                    |
| 854  | IPI00620256 | Lamin-A/C;Lamin-A/C     | Lmna;Lmn1;Lmna;Lmn   | T24   | 1           | 13            | SGAQASSTPLSPTR     | SGAQASSTPLS(0.5)PT(0   | SGAQASSTPLS(ph)PTR     | NEK6             | 1.1                       | 0.41827      |            | No                     |
| 689  | IPI00400300 | Lamin-A/C;Lamin-A/C     | Lmna;Lmn1;Lmna;Lmn   | T548  | 1           | 3             | SLTMVEDNEDDDEGEE   | S(0.15)LT(0.85)IMVEDN  | SLT(ph)IMVEDNEDDDE     | CHK1/2           | 1.2                       | 0.34584      |            | Yes                    |
| 352  | IPI00620256 | Lamin-A/C;Lamin-A/C;L   | Lmna;Lmn1;Lmna;Lmn   | S390  | 1           | 4             | LRLSPSPTSQR        | LRLS(0.928)PS(0.071)P  | (ca)LRLS(ph)PSPTSQR    | PKA              | 0.9                       | 0.17006      |            | Yes                    |
| 192  | IPI00620256 | Lamin-A/C;Lamin-A/C;L   | Lmna;Lmn1;Lmna;Lmn   | S392  | 1           | 6             | LRLSPSPTSQR        | LRLS(0.029)PS(0.971)P  | LRLSPS(ph)PTSQR        | NEK6             | 0.8                       | 0.05045      |            | Yes                    |
| 41   | IPI00620256 | Lamin-A/C;Lamin-A/C;L   | Lmna;Lmn1;Lmna;Lmn   | S395  | 2           | 9             | LRLSPSPTSQR        | LRLS(0.386)PS(0.386)P  | LRLS(ph)PSPTS(ph)QR    | CK1              | 0.3                       | 2.007E-11    | Down       | No                     |
| 1132 | IPI00620256 | Lamin-A/C;Lamin-A/C;L   | Lmna;Lmn1;Lmna;Lmn   | S403  | 1           | 2             | ASSHSSQSQGGGSVTK   | AS(0.455)S(0.455)HS(0  | AS(ph)SHSSQSQGGGS      | PKA              |                           |              |            | No                     |
| 1136 | IPI00620256 | Lamin-A/C;Lamin-A/C;L   | Lmna;Lmn1;Lmna;Lmn   | S404  | 1           | 3             | ASSHSSQSQGGGSVTK   | AS(0.455)S(0.455)HS(0  | AS(ph)SHSSQSQGGGS      | PKA/AKT          |                           |              |            | No                     |
| 1137 | IPI00620256 | Lamin-A/C;Lamin-A/C;L   | Lmna;Lmn1;Lmna;Lmn   | S406  | 1           | 5             | ASSHSSQSQGGGSVTK   | AS(0.114)S(0.114)HS(0  | ASSHS(ph)SQSQGGGS      | CK1              |                           |              |            | No                     |
| 1140 | IPI00620256 | Lamin-A/C;Lamin-A/C;L   | Lmna;Lmn1;Lmna;Lmn   | S407  | 1           | 6             | ASSHSSQSQGGGSVTK   | AS(0.114)S(0.114)HS(0  | ASSHS(ph)SQSQGGGS      | CK1              |                           |              |            | No                     |
| 1142 | IPI00620256 | Lamin-A/C;Lamin-A/C;L   | Lmna;Lmn1;Lmna;Lmn   | T394  | 2           | 8             | LRLSPSPTSQR        | LRLS(0.386)PS(0.386)P  | LRLS(ph)PSPTS(ph)QR    |                  |                           |              |            | No                     |
| 1138 | IPI00849159 | similar to DNA cytosine | LOC100048887         | S217  | 1           | 9             | TTGVGGTGSATSCR     | TTGVGGT(0.05)GS(0.3)   | (ca)TTGVGGTGS(ph)ATSCR |                  |                           |              |            | No                     |
| 498  | IPI00849159 | similar to DNA cytosine | LOC100048887         | S220  | 1           | 12            | TTGVGGTGSATSCR     | TTGVGGT(0.017)GS(0.1   | (ca)TTGVGGTGSATS(p     | CK1              | 1.0                       | 0.25752      |            | Yes                    |
| 740  | IPI00172202 | Protein LSM14 homolo    | Lsm14a;Fam61a        | S216  | 1           | 2             | RSVPARPLPPTSQK     | RS(1)PVPARPLPPTSQK     | RS(ph)PVPARPLPPTSQ     | PKA              | 1.2                       | 0.36826      |            | Yes                    |
| 979  | IPI00874393 | Latent-transforming gr  | Ltbp2;Ltbp2          | S491  | 1           | 13            | VRGELDPVLEDNSVTR   | VRGELDPVLEDNS(0.974    | VRGELDPVLEDNS(ph)      | PLK1             | 1.1                       | 0.4673       |            | Yes                    |
| 484  | IPI00607974 | Protein MAK16 homolo    | Mak16;Rbm13          | S197  | 2           | 9             | ALEKQEAESDESEDEEE  | ALEKQEAES(1)DS(1)ED    | ALEKQEAES(ph)DS        | CK2              | 1.2                       | 0.24977      |            | Yes                    |
| 485  | IPI00607974 | Protein MAK16 homolo    | Mak16;Rbm13          | S199  | 2           | 11            | ALEKQEAESDESEDEEE  | ALEKQEAES(1)DS(1)ED    | ALEKQEAES(ph)DS        | CK2              | 1.2                       | 0.24977      |            | Yes                    |
| 1021 | IPI00676243 | Microtubule-associated  | Map1a;Mtap1;Mtap1a   | S2027 | 1           | 9             | VPSAPGQESVPVPTK    | VPS(0.001)APGQES(0.9   | VPSAPGQES(ph)VPVPTK    |                  | 1.1                       | 0.48585      |            | Yes                    |
| 206  | IPI00676243 | Microtubule-associated  | Map1a;Mtap1;Mtap1a   | S905  | 1           | 12            | AEELEEMEVHPSDEEE   | AEELEEMEVHPS(1)DEE     | AEELEEMEVHPS(ph)D      | CK2              | 0.8                       | 0.060625     |            | Yes                    |
| 1106 | IPI00223621 | Microtubule-associated  | Map1s;Bpy2lp1;Map8   | S658  | 1           | 1             | STSPHDVLDLCLVSPCF  | S(0.396)T(0.302)S(0.30 | S(ph)TSPHDVLDLCLVSP    | PKA              |                           |              |            | No                     |
| 623  | IPI00223621 | Microtubule-associated  | Map1s;Bpy2lp1;Map8   | S660  | 1           | 4             | RSTSPHDVLDLCLVSPCF | RS(0.206)T(0.206)S(0.5 | RSTS(ph)PHDVLCLVCS     | CAMK2            | 1.2                       | 0.3114       |            | No                     |
| 1109 | IPI00223621 | Microtubule-associated  | Map1s;Bpy2lp1;Map8   | T659  | 1           | 3             | RSTSPHDVLDLCLVSPCF | RS(0.333)T(0.333)S(0.3 | RS(ph)TSPHDVLDLCLV     | CHK1/2           |                           |              |            | No                     |
| 87   | IPI00874452 | 72 kDa protein          | Map3k2               | S180  | 1           | 4             | DRSSPPPGYIPDELQIAH | DRS(0.011)S(0.989)PPP  | DRSS(ph)PPGYIPDEL      | Polo box         | 0.6                       | 0.0005296    |            | Yes                    |
| 407  | IPI00408119 | Microtubule-associated  | Map4;Mtap4;Map4;M    | S345  | 1           | 18            | DVAPPMEEEIVPGNDT   | DVAPPMEEEIVPGNDT(I     | DVAPPMEEEIVPGNDT       | CDK1             | 1.3                       | 0.2109       |            | Yes                    |
| 691  | IPI00408119 | Microtubule-associated  | Map4;Mtap4;Map4;M    | S475  | 1           | 3             | DMSPLPESEVTLGK     | DMS(1)PLPESEVTLGK      | DMS(ph)PLPESEVTLGK     | CHK1             | 1.0                       | 0.3465       |            | Yes                    |
| 791  | IPI00408119 | Microtubule-associated  | Map4;Mtap4;Map4;M    | S506  | 1           | 11            | VAEFNNVTLSEEEVTSV  | VAEFNNVT(0.007)PLS(0   | VAEFNNVTPS(ph)EE       | CK2              | 1.1                       | 0.38705      |            | Yes                    |
| 671  | IPI00408119 | Microtubule-associated  | Map4;Mtap4;Map4;M    | S517  | 1           | 3             | DMPSAETAAPLAK      | DMS(1)PSAETAAPLAK      | DMS(ph)PSAETAAPLAK     |                  | 1.0                       | 0.3405       |            | Yes                    |
| 1129 | IPI00408119 | Microtubule-associated  | Map4;Mtap4;Map4;M    | T343  | 1           | 16            | DVAPPMEEEIVPGNDT   | DVAPPMEEEIVPGNDT(I     | DVAPPMEEEIVPGNDT       | (ph)TSPK         |                           |              |            | No                     |
| 1133 | IPI00408119 | Microtubule-associated  | Map4;Mtap4;Map4;M    | T344  | 1           | 17            | DVAPPMEEEIVPGNDT   | DVAPPMEEEIVPGNDT(I     | DVAPPMEEEIVPGNDT       | (ph)TSPK         |                           |              |            | No                     |
| 1126 | IPI00408119 | Microtubule-associated  | Map4;Mtap4;Map4;M    | T522  | 1           | 8             | DMPSAETAAPLAK      | DMS(0.312)PS(0.204)A   | (ca)DM(ox)PSAET(ph     | CK1              |                           |              |            | No                     |
| 565  | IPI00408119 | Microtubule-associated  | Map4;Mtap4;Map4;M    | S1046 | 1           | 3             | VGSLDNVGHLPAGGAVK  | VGS(1)LDNVGHLPAGGAV    | VGS(ph)LDNVGHLPAGG     | AVK              | 1.0                       | 0.28441      |            | Yes                    |
| 699  | IPI00408119 | Microtubule-associated  | Map4;Mtap4;Map4;M    | S667  | 1           | 21            | AAVGTGNDITTPPNK    | AAVGT(0.001)GNDIT(I    | AAVGTGNDITTPPNK        | WW GroupIV       | 1.2                       | 0.34942      |            | Yes                    |
| 232  | IPI00408119 | Microtubule-associated  | Map4;Mtap4;Map4;M    | S785  | 1           | 3             | ATSPSTLVSTGSSR     | AT(0.077)S(0.923)PS(0  | ATS(ph)PSTLVSTGSS      | PKD              | 0.9                       | 0.075848     |            | Yes                    |
| 503  | IPI00408119 | Microtubule-associated  | Map4;Mtap4;Map4;M    | S914  | 1           | 3             | VGSTENIK           | VGS(0.991)T(0.009)ENI  | VGS(ph)TENIK           | CK1              | 1.0                       | 0.2585       |            | Yes                    |
| 1148 | IPI00408119 | Microtubule-associated  | Map4;Mtap4;Map4;M    | T784  | 1           | 2             | ATSPSTLVSTGSSR     | AT(0.497)S(0.497)PS(0  | AT(ph)PSTLVSTGSS       | CK1              |                           |              |            | No                     |
| 856  | IPI00408119 | Microtubule-associated  | Map4;Mtap4;Map4;M    | T915  | 1           | 6             | SKVGSTENIK         | SKVGS(0.072)T(0.928)E  | SKVGST(ph)ENIK         | FHA2 Rad53p      | 1.1                       | 0.41966      |            | Yes                    |
| 229  | IPI00923108 | Map4k4 protein;MKIA     | Map4k4;Map4k4;MKIA   | S684  | 1           | 3             | RDSPQLQGGQQNQSQAG  | RDS(1)PLQGGQQNQSQ      | RDS(ph)PLQGGQQNQ       | CHK1/2           | 0.9                       | 0.074322     |            | Yes                    |
| 22   | IPI00119663 | Mitogen-activated prot  | Mapk1;Erk2;Mapk;Prkr | T179  | 1           | 9             | VADPDHDHTGFLTEYVA  | VADPDHDHT(0.442)GFL    | VADPDHDHT(ph)GFL       | FHA2 Rad53p      | 8.7                       | 5.009E-33    | Up         | No                     |
| 58   | IPI00119663 | Mitogen-activated prot  | Mapk1;Erk2;Mapk;Prkr | Y185  | 1           | 15            | VADPDHDHTGFLTEYVA  | VADPDHDHTGFL(0.09      | VADPDHDHTGFLTEY        | (ph)VATR         | 2.4                       | 2.421E-06    | Up         | Yes                    |
| 43   | IPI00230277 | Mitogen-activated prot  | Mapk3;Erk1;Prkm3;Ma  | T208  | 1           | 18            | IADPEHDHTGFLTEYVAT | IADPEHDHT(0.068)GFL    | IADPEHDHTGFLTEYV       | (ph)R            | 3.0                       | 1.82E-09     | Up         | No                     |
| 44   | IPI00230277 | Mitogen-activated prot  | Mapk3;Erk1;Prkm3;Ma  | Y205  | 1           | 15            | IADPEHDHTGFLTEYVAT | IADPEHDHTGFL(0.105     | IADPEHDHTGFLTEY        | (ph)VATR         | 2.9                       | 1.695E-08    | Up         | Yes                    |
| 1009 | IPI00229534 | Myristoylated alanine-  | Marcks;Macs          | S138  | 1           | 8             | AEDGAAPSPSSETPK    | AEDGAAPS(0.878)PS(0    | AEDGAAPS(ph)PSSETPK    |                  | 1.1                       | 0.48113      |            | Yes                    |
| 221  | IPI00229534 | Myristoylated alanine-  | Marcks;Macs          | S140  | 1           | 10            | AEDGAAPSPSSETPK    | AEDGAAPS(0.145)PS(0    | AEDGAAPS(ph)SETPKK     |                  | 1.4                       | 0.067963     |            | No                     |
| 994  | IPI00229534 | Myristoylated alanine-  | Marcks;Macs          | S141  | 1           | 11            | AEDGAAPSPSSETPK    | AEDGAAPS(0.05)S(0      | AEDGAAPS(ph)ET         | CK1              | 1.1                       | 0.47516      |            | Yes                    |
| 746  | IPI00229534 | Myristoylated alanine-  | Marcks;Macs          | S46   | 1           | 6             | VNGDASPAAPGPAK     | VNGDAS(1)PAAAPGPAK     | VNGDAS(ph)PAAAPGPA     |                  | 1.2                       | 0.3709       |            | Yes                    |
| 947  | IPI00229534 | Myristoylated alanine-  | Marcks;Macs          | T143  | 1           | 13            | AEDGAAPSPSSETPK    | AEDGAAPS(1)PK          | AEDGAAPS(1)PK          | CDK2             | 1.1                       | 0.45551      |            | Yes                    |
| 1051 | IPI00281011 | MARCKS-related protei   | Marcks1;Mlp;Mrp      | T85   | 1           | 8             | GEVAPKETP          | GEVAPKET(1)PK          | GEVAPKET(ph)PK         | CDK2             | 1.1                       | 0.49883      |            | Yes                    |
| 154  | IPI00554855 | Serine/threonine-prote  | Mark2;Emk;Mark2;Emk  | T208  | 1           | 3             | LDTFCGSPYAAPELFGK  | LDT(1)FCGSPYAAPEL      | LDT(ph)FCGSPYAAPEL     | FGK              | 0.8                       | 0.024203     | Down       | Yes                    |
| 116  | IPI00453826 | Matrin-3                | Matr3                | S188  | 1           | 3             | RDSFDDRGSLNPLVDYI  | RDS(0.999)FDDRGPS(0    | RDS(ph)FDDRGSLNPL      | PKA              | 1.8                       | 0.0026584    |            | Yes                    |

| No   | IPI Numbers | Protein Names            | Gene Names           | pAA   | Number of P | Position in p | Peptide Sequence    | Phospho (STY) Probabi      | Modified Sequence         | Best Motif        | Ratio <sup>1</sup> of Phd | Ratio Signif | Up-/Down-r | Localized phosphosite? |
|------|-------------|--------------------------|----------------------|-------|-------------|---------------|---------------------|----------------------------|---------------------------|-------------------|---------------------------|--------------|------------|------------------------|
| 84   | IPI00453826 | Matrin-3                 | Matr3                | S195  | 1           | 10            | RDSFDDRRGSLNPVLDY   | RDS(0.056)FDDRRG(S)0.28    | RDSFDDRRGSLNPVLDYDHGSR    | CAMK2             | 2.0                       | 0.0003883    | Up         | Yes                    |
| 1294 | IPI00453826 | Matrin-3                 | Matr3                | S206  | 1           | 21            | RDSFDDRRGSLNPVLDY   | RDS(0.28)FDDRRG(S)0.28     | RDSFDDRRGSLNPVLDYDHGSR    |                   |                           |              |            | No                     |
| 302  | IPI00453826 | Matrin-3                 | Matr3                | S604  | 2           | 9             | SYSPDGGKESPSDKK     | S(0.435)Y(0.282)S(0.28)    | S(ph)YSPDGGKES(ph)PSDKK   |                   | 1.3                       | 0.12941      |            | Yes                    |
| 334  | IPI00323820 | DNA replication licensi  | Mcm2;Bm28;Ccd1;Kia   | S139  | 1           | 6             | GLLYDSSEDEERPAR     | GLLY(0.002)DS(0.86)S(0.86) | GLLYDS(ph)SEDEERPAR       | CK2               | 1.3                       | 0.15596      |            | Yes                    |
| 216  | IPI00323820 | DNA replication licensi  | Mcm2;Bm28;Ccd1;Kia   | S140  | 1           | 8             | RGLLYDSSEDEERPAR    | RGLLY(0.201)DS(0.201)      | RGLLYDS(ph)SEDEERPAR      |                   | 1.4                       | 0.065241     |            | No                     |
| 1185 | IPI00323820 | DNA replication licensi  | Mcm2;Bm28;Ccd1;Kia   | S26   | 1           | 8             | RISDPLTSSPGR        | RIS(0.059)DPLT(0.466)S     | RISDPLT(ph)SSPGR          |                   |                           |              |            | No                     |
| 432  | IPI00323820 | DNA replication licensi  | Mcm2;Bm28;Ccd1;Kia   | S27   | 1           | 8             | ISDPLTSSPGR         | ISDPLTSS(1)PGR             | ISDPLTSS(ph)PGR           | Polo box          | 1.2                       | 0.22522      |            | Yes                    |
| 1188 | IPI00323820 | DNA replication licensi  | Mcm2;Bm28;Ccd1;Kia   | T25   | 1           | 7             | RISDPLTSSPGR        | RIS(0.059)DPLT(0.466)S     | RISDPLT(ph)SSPGR          |                   |                           |              |            | No                     |
| 227  | IPI00108338 | DNA replication licensi  | Mcm3;Mcmd;Mcmd3      | S668  | 1           | 3             | KASEDESDLEDEEEKSQE  | KAS(0.785)EDES(0.213)      | KAS(ph)EDESDEDEEE         | CK2               | 1.4                       | 0.073538     |            | Yes                    |
| 374  | IPI00108338 | DNA replication licensi  | Mcm3;Mcmd;Mcmd3      | S672  | 1           | 7             | KASEDESDLEDEEEKSQE  | KAS(0.031)EDES(0.969)      | KASEDESDLEDEEE            | CK2               | 1.3                       | 0.18467      |            | Yes                    |
| 390  | IPI00753701 | Mediator of DNA dama     | Mdc1;Kiaa0170        | S168  | 1           | 7             | VLLAADSEEEGDFPSSGR  | VLLAADS(1)EEEGDFPSSGR      | VLLAADS(ph)EEEGDFPSSGR    |                   | 1.3                       | 0.19899      |            | Yes                    |
| 310  | IPI00129226 | E3 ubiquitin-protein lig | Mdm2;Mdm2;Mdm2       | S183  | 1           | 1             | SLSFDPSSLGLCEL      | S(0.644)LS(0.356)FDPSS     | S(ph)LSFDPSSLGLCEL        | PKA/AKT           | 1.3                       | 0.13546      |            | No                     |
| 538  | IPI00224399 | Mediator of RNA polym    | Med19                | S226  | 1           | 4             | NRHSPDHPGMSGSSQAS   | NRHS(0.996)PDHPGMSG        | NRHS(ph)PDHPGMSG          | PKA               | 1.2                       | 0.27081      |            | Yes                    |
| 15   | IPI00224399 | Mediator of RNA polym    | Med19                | S234  | 7           | 12            | NRHSPDHPGMSGSSQAS   | NRHS(0.992)PDHPGMSG        | (ca)NRHS(ph)PDHPGMSG      | GSK3              | 9.6                       | 2.659E-36    | Up         | No                     |
| 16   | IPI00224399 | Mediator of RNA polym    | Med19                | S235  | 7           | 13            | NRHSPDHPGMSGSSQAS   | NRHS(0.992)PDHPGMSG        | (ca)NRHS(ph)PDHPGMSG      | GSK3              | 9.6                       | 2.659E-36    | Up         | No                     |
| 17   | IPI00224399 | Mediator of RNA polym    | Med19                | S238  | 7           | 16            | NRHSPDHPGMSGSSQAS   | NRHS(0.992)PDHPGMSG        | (ca)NRHS(ph)PDHPGMSG      | CK1               | 9.6                       | 2.659E-36    | Up         | No                     |
| 18   | IPI00224399 | Mediator of RNA polym    | Med19                | S239  | 7           | 17            | NRHSPDHPGMSGSSQAS   | NRHS(0.992)PDHPGMSG        | (ca)NRHS(ph)PDHPGMSG      | CK1               | 9.6                       | 2.659E-36    | Up         | No                     |
| 19   | IPI00224399 | Mediator of RNA polym    | Med19                | S240  | 7           | 18            | NRHSPDHPGMSGSSQAS   | NRHS(0.992)PDHPGMSG        | (ca)NRHS(ph)PDHPGMSG      | (ox)GS(ph)QAS(ph) | 9.6                       | 2.659E-36    | Up         | No                     |
| 20   | IPI00224399 | Mediator of RNA polym    | Med19                | S241  | 7           | 19            | NRHSPDHPGMSGSSQAS   | NRHS(0.992)PDHPGMSG        | (ca)NRHS(ph)PDHPGMSG      | CK1               | 9.6                       | 2.659E-36    | Up         | No                     |
| 21   | IPI00224399 | Mediator of RNA polym    | Med19                | S242  | 7           | 20            | NRHSPDHPGMSGSSQAS   | NRHS(0.992)PDHPGMSG        | (ca)NRHS(ph)PDHPGMSG      | CK1               | 9.6                       | 2.659E-36    | Up         | No                     |
| 980  | IPI00228590 | Microfibrillar-associate | Mfap1                | T267  | 1           | 10            | SLAALDALNTDDEENDEEE | S(0.153)LAALDALNT(0.4)     | SLAALDALNT(ph)DDEE        | CK2               | 1.1                       | 0.46746      |            | Yes                    |
| 1080 | IPI00222037 | Melanoma inhibitory a    | Mia3;Kiaa0268;Mia3;K | S1765 | 1           | 14            | HSASDPGAPVNVSSSR    | HS(0.004)AS(0.017)DPG      | HSASDPGAPVNVSSSR          | (ph)GSK3          |                           |              |            | No                     |
| 1082 | IPI00222037 | Melanoma inhibitory a    | Mia3;Kiaa0268;Mia3;K | S1766 | 1           | 15            | HSASDPGAPVNVSSSR    | HSASDPGAPVNVNS(0.0)        | HSASDPGAPVNVSSSR          | (ph)GSK3          |                           |              |            | No                     |
| 1087 | IPI00222037 | Melanoma inhibitory a    | Mia3;Kiaa0268;Mia3;K | S1767 | 1           | 16            | HSASDPGAPVNVSSSR    | HSASDPGAPVNVNS(0.0)        | HSASDPGAPVNVSSSR          | (ph)GSK3          |                           |              |            | No                     |
| 304  | IPI00222037 | Melanoma inhibitory a    | Mia3;Kiaa0268;Mia3;K | S1916 | 1           | 15            | DSLPSGPREEAKPASPS   | DSLPSGPREEAKPAS(0.9)       | DSLPSGPREEAKPAS(ph)       | WW GroupIV        | 1.3                       | 0.1318       |            | Yes                    |
| 1076 | IPI00222037 | Melanoma inhibitory a    | Mia3;Kiaa0268;Mia3;K | S1918 | 1           | 9             | EEAKPASPSVQDR       | EEAKPAS(0.468)PS(0.46)     | EEAKPAS(ph)PSSVQDR        |                   |                           |              |            | No                     |
| 1077 | IPI00222037 | Melanoma inhibitory a    | Mia3;Kiaa0268;Mia3;K | S1919 | 1           | 18            | DSLPSGPREEAKPASPS   | DS(0.02)LP(0.01)GPRE       | DSLPSGPREEAKPASPS         | CK1               |                           |              |            | No                     |
| 66   | IPI00280103 | JRAB;Putative uncharac   | Micall2;JRAB;mcG_12  | S766  | 1           | 16            | RKPCPAGSGPSPALSP    | RKPCPAGSGPSPALSP(0.0)      | RKPCPAGSGPSPALSP          | GSK3              | 0.5                       | 1.862E-05    | Down       | Yes                    |
| 833  | IPI00720036 | Myosin phosphatase R     | Mrip;Kiaa0864;Mrip;F | S1018 | 1           | 3             | SKSVIEQVSWDN        | S(0.999)KS(0.001)VIEQ      | S(ph)KSVIEQVSWDN          |                   | 1.0                       | 0.40644      |            | Yes                    |
| 695  | IPI00720036 | Myosin phosphatase R     | Mrip;Kiaa0864;Mrip;F | S1020 | 1           | 3             | SKSVIEQVSWDN        | S(0.027)KS(0.973)VIEQ      | SKS(ph)VIEQVSWDN          | CAMK2             | 1.0                       | 0.34813      |            | Yes                    |
| 134  | IPI00720036 | Myosin phosphatase R     | Mrip;Kiaa0864;Mrip;F | S292  | 1           | 13            | AEEQLPPLSPSPSPSP    | AEEQLPPLSP(0.001)PSP       | AEEQLPPLSPSPSPSP          | (ph)WW GroupIV    | 0.7                       | 0.011856     |            | Yes                    |
| 1248 | IPI00720036 | Myosin phosphatase R     | Mrip;Kiaa0864;Mrip;F | S294  | 1           | 15            | AEEQLPPLSPSPSPSP    | AEEQLPPLSP(0.06)PSP        | AEEQLPPLSPSPSPSP          | (ph)PSP           | 0.2                       |              |            | No                     |
| 1252 | IPI00720036 | Myosin phosphatase R     | Mrip;Kiaa0864;Mrip;F | T295  | 1           | 16            | AEEQLPPLSPSPSPSP    | AEEQLPPLSP(0.06)PSP        | AEEQLPPLSPSPSPSP          | (ph)PSP           | 0.2                       |              |            | No                     |
| 938  | IPI00720036 | Myosin phosphatase R     | Mrip;Kiaa0864;Mrip;F | S543  | 1           | 3             | SKTFDWAEFRPIQQAAL   | S(0.926)KT(0.074)FDW       | S(ph)KTFDWAEFRPIQQAAL     | QER               | 1.1                       | 0.45216      |            | Yes                    |
| 978  | IPI00720036 | Myosin phosphatase R     | Mrip;Kiaa0864;Mrip;F | T545  | 1           | 1             | SKTFDWAEFRPIQQAAL   | S(0.137)KT(0.863)FDW       | SKT(ph)FDWAEFRPIQQAAL     | CAMK2             | 1.1                       | 0.46704      |            | Yes                    |
| 29   | IPI00118853 | Double-strand break re   | Mre11a;Mre11;Mre11   | S686  | 1           | 2             | GVDFESDEDDDDPFM     | GVDFES(1)DEDDDDPFM         | GVDFES(ph)DEDDDDPFM       | (ox)SSCCPR        | 0.2                       | 8.198E-25    | Down       | Yes                    |
| 959  | IPI00896700 | Mtap1b protein;Microt    | Mtap1b;Map1b;Mtap1   | S1371 | 2           | 6             | ASLSPMDEPVPDSESPV   | AS(0.657)LS(0.657)PM       | AS(ph)LS(ph)PM            | (ox)DEPVPDSESPVEK | 1.1                       | 0.45871      |            | No                     |
| 1201 | IPI00896700 | Mtap1b protein;Microt    | Mtap1b;Map1b;Mtap1   | S1382 | 1           | 13            | ASLSPMDEPVPDSESPV   | ASLSPMDEPVPDPS(0.5)        | ASLSPMDEPVPDPS(ph)        | ESPVEK            |                           |              |            | No                     |
| 1025 | IPI00896700 | Mtap1b protein;Microt    | Mtap1b;Map1b;Mtap1   | S1384 | 1           | 15            | ASLSPMDEPVPDSESPV   | AS(0.139)LS(0.139)PM       | ASLSPMDEPVPDSESPV         | CK2               | 1.1                       | 0.487        |            | No                     |
| 648  | IPI00896700 | Mtap1b protein;Microt    | Mtap1b;Map1b;Mtap1   | S1422 | 1           | 4             | RSESPFEKG           | RS(0.001)ES(0.999)PFE      | RSES(ph)PFEKG             | CAMK2             | 1.0                       | 0.32663      |            | Yes                    |
| 135  | IPI00896700 | Mtap1b protein;Microt    | Mtap1b;Map1b;Mtap1   | S614  | 1           | 9             | EVSSKEEQSPVKAIEVAEK | EVS(0.033)S(0.155)KEE      | EVSSKEEQS(ph)PVKAE        | CDK2              | 1.6                       | 0.012416     | Up         | Yes                    |
| 305  | IPI00330599 | Protein LYRIC;Lysine-ri  | Mtdh;Lyric           | S423  | 1           | 12            | SQEPISNDQKVSDDDKKE  | SQEPIS(0.014)NDQKVS        | SQEPISNDQKVS(ph)DDDKKE    |                   | 1.3                       | 0.13182      |            | Yes                    |
| 470  | IPI00226263 | Matrix-remodeling-ass    | Mxra7;Tmap1;Mxra7;R  | S79   | 1           | 7             | VAEPEESEAEPEAEGR    | VAEPEES(1)EAEPEAEGR        | VAEPEES(ph)EAEPEAE        | CK2               | 1.0                       | 0.24365      |            | Yes                    |
| 590  | IPI00331361 | Myb-binding protein 1    | Mybbp1a;P160;Mybbp   | S1325 | 1           | 3             | SPSLQSGVK           | S(0.094)PS(0.906)LLQS      | SPS(ph)LLQSGVK            | PKD               | 1.0                       | 0.29491      |            | Yes                    |
| 1265 | IPI00757312 | Myosin, heavy polypep    | Myh10;RP23-396M19    | S1989 | 1           | 8             | QLHIEGASLELSDDDTE   | QLHIEGAS(0.498)LELS(0.498) | (ca)QLHIEGAS(ph)LELS      | GSK3              |                           |              |            | No                     |
| 857  | IPI00757312 | Myosin, heavy polypep    | Myh10;RP23-396M19    | S1993 | 1           | 13            | QLHIEGASLELSDDDTE   | QLHIEGASLELS(1)DD          | QLHIEGASLELS(ph)DD        | NEK6              | 1.1                       | 0.4197       |            | Yes                    |
| 1269 | IPI00757312 | Myosin, heavy polypep    | Myh10;RP23-396M19    | T1997 | 1           | 17            | QLHIEGASLELSDDDTE   | QLHIEGAS(0.256)LELS        | QLHIEGAS(ph)LELSDDDTESK   |                   |                           |              |            | No                     |
| 1043 | IPI00123181 | Myosin-9;Myosin heav     | Myh9                 | S1943 | 1           | 7             | KGTGDCSDEEVDGK      | KGTGDCS(1)GDEVDGK          | KGTGDCS(ph)DEEVDGK        | CK2               | 1.1                       | 0.49274      |            | Yes                    |
| 960  | IPI00123181 | Myosin-9;Myosin heav     | Myh9                 | T1939 | 1           | 3             | KGTGDCSDEEVDGK      | KGT(0.881)GDCS(0.119)      | (ca)KGT(ph)GDCSDEE        | PKA               | 1.1                       | 0.45885      |            | Yes                    |
| 682  | IPI00649326 | Myosin-XVIIIa;Myosin     | Myo18a;Myspdz;Myo1   | S2028 | 1           | 16            | SSSPTSHWKLAPDPSDI   | SSSPTSHWKLAPDPS(1)         | SSSPTSHWKLAPDPS           | CK2               | 1.0                       | 0.34251      |            | Yes                    |
| 60   | IPI00754649 | Myosin-Ic;Myosin I be    | Myo1c                | S6    | 1           | 4             | YRASALGSDGVR        | Y(0.014)RAS(0.986)ALG      | YRAS(ph)ALGSDGVR          | PKA               | 0.5                       | 3.449E-06    | Down       | Yes                    |
| 1256 | IPI00890268 | Myosin Va;Myosin-Va      | Myo5a;RP24-18912.1   | T1650 | 1           | 1             | TSSIADEGTYLDSILR    | T(0.492)S(0.254)S(0.25)    | T(ph)SSIADEGTYLDSILR      | PKA               | 0.2                       |              |            | No                     |
| 820  | IPI00464223 | Myoferlin;Fer-1-like pr  | Myof;Fer13;Kiaa1207  | S174  | 1           | 7             | GPSGTVSEAQALR       | GPSGTVS(1)EAQALR           | GPSGTVS(ph)EAQALR         | CK1               | 1.0                       | 0.39948      |            | Yes                    |
| 976  | IPI00111831 | Nascent polypeptide-as   | Naca;Gm1878;Naca     | S2138 | 1           | 22            | VQGEAVSNIQENTQTPT   | VQGEAVSNIQENTQTPT          | VQGEAVSNIQENTQTPT         | CK2               | 1.1                       | 0.46642      |            | Yes                    |
| 911  | IPI00111831 | Nascent polypeptide-as   | Naca;Gm1878;Naca     | T2133 | 1           | 17            | VQGEAVSNIQENTQTPT   | VQGEAVSNIQENTQTPT          | VQGEAVSNIQENTQTPT         | CK2               | 1.1                       | 0.44377      |            | Yes                    |
| 69   | IPI00115895 | NAD kinase;Poly(P)/AT    | Nadk;Nadk;RP23-183D  | S46   | 1           | 1             | SLSASPALGSTK        | S(0.986)LS(0.014)ASPA      | S(ph)SLSASPALGSTK         | GSK3              | 0.6                       | 3.6E-05      | Down       | Yes                    |
| 67   | IPI00458056 | Nuclear cap-binding pr   | Ncbp1                | S22   | 1           | 3             | KTSDANETEDHLESICK   | KT(0.082)S(0.917)DANE      | KTS(ph)DANETEDHLESICK     | PKA               | 2.2                       | 2.912E-05    | Up         | Yes                    |
| 1117 | IPI00309413 | SH2/SH3 adaptor prote    | Nck2;mNck-beta;mcG   | S90   | 1           | 3             | DASPTPSTDAEYPANGS   | DAS(0.321)PT(0.321)PS      | DAS(ph)PTPSTDAEYPA        | CAMK2             |                           |              |            | No                     |
| 1121 | IPI00309413 | SH2/SH3 adaptor prote    | Nck2;mNck-beta;mcG   | S94   | 1           | 7             | DASPTPSTDAEYPANGS   | DAS(0.321)PT(0.321)PS      | DAS(ph)PTPSTDAEYPA        | CK1               |                           |              |            | No                     |
| 1124 | IPI00309413 | SH2/SH3 adaptor prote    | Nck2;mNck-beta;mcG   | T92   | 1           | 5             | DASPTPSTDAEYPANGS   | DAS(0.321)PT(0.321)PS      | DAS(ph)PTPSTDAEYPANGSGADR |                   |                           |              |            | No                     |
| 555  | IPI00317794 | Nucleolin;Protein C23    | Ncl;Nuc              | S145  | 2           | 4             | KEDSDEDEDEEDEDSD    | KEDS(1)DEDEDEEDED          | KEDS(ph)DEDEDEEDED        | (ph)DEDEDEEDEF    | 1.2                       | 0.27879      |            | Yes                    |
| 556  | IPI00317794 | Nucleolin;Protein C23    | Ncl;Nuc              | S157  | 2           | 16            | KEDSDEDEDEEDEDSD    | KEDS(1)DEDEDEEDED          | KEDS(ph)DEDEDEEDED        | (ph)DEDEDEEDEF    | 1.2                       | 0.27879      |            | Yes                    |
| 142  | IPI00313525 | Nuclear receptor coact   | Ncoa5;Ncoa5;RP23-61  | S29   | 2           | 3             | DRSPIRGS            | DRS(1)PIRGS(1)PR           | DRS(ph)PIRGS(ph)PR        | CDK2              | 1.6                       | 0.015565     | Up         | Yes                    |
| 143  | IPI00313525 | Nuclear receptor coact   | Ncoa5;Ncoa5;RP23-61  | S34   | 2           | 8             | DRSPIRGS            | DRS(1)PIRGS(1)PR           | DRS(ph)PIRGS(ph)PR        | CDK2              | 1.6                       | 0.015565     | Up         | Yes                    |
| 1016 | IPI00274795 | Nuclear receptor corep   | Ncor1;Rxp13;Ncor1;N  | S225  | 1           | 19            | QQQLEEEAAKPPPEKPK   | QQQLEEEAAKPPPEKPK          | QQQLEEEAAKPPPEKPK         | WW GroupIV        | 1.1                       | 0.48331      |            | Yes                    |

| No   | IPI Numbers | Protein Names            | Gene Names            | pAA   | Number of P | Position in p | Peptide Sequence    | Phospho (STY) Probabi  | Modified Sequence      | Best Motif      | Ratio <sup>1</sup> of Phd | Ratio Signifid | Up-/Down-r | Localized phosphosite? |    |
|------|-------------|--------------------------|-----------------------|-------|-------------|---------------|---------------------|------------------------|------------------------|-----------------|---------------------------|----------------|------------|------------------------|----|
| 203  | IPI00123871 | Nuclear receptor corep   | Ncor2;Smrt;Ncor2;Smr  | S1023 | 1           | 3             | SRSVPVPAEK          | S(0.112)RS(0.888)PVPP  | _SRS(ph)PVPPAEK_       |                 | 1.4                       | 0.057045       |            | Yes                    |    |
| 1302 | IPI00123871 | Nuclear receptor corep   | Ncor2;Smrt;Ncor2;Smr  | S359  | 1           | 6             | VGQRGSLMSAAR        | VGQRGS(1)GLMSAAR       | (ca)VGQRGS(ph)GLSM     | PKA             |                           |                |            | Yes                    |    |
| 172  | IPI00125960 | Protein NDRG1;N-myc      | Ndr1;Ndr1;Ndr1;Tdd5   | S330  | 1           | 3             | TASGSSVTSLEGTR      | T(0.001)AS(0.999)GSSV  | TAS(ph)GSSVTSLEGTR     | PKA/AKT         | 1.5                       | 0.038342       | Up         | Yes                    |    |
| 54   | IPI00125960 | Protein NDRG1;N-myc      | Ndr1;Ndr1;Ndr1;Tdd5   | S333  | 1           | 6             | TASGSSVTSLEGTR      | T(0.007)AS(0.027)GS(O  | TASGSS(ph)VTSLEGTR     | CK1             | 0.5                       | 9.506E-07      | Down       | No                     |    |
| 115  | IPI00125960 | Protein NDRG1;N-myc      | Ndr1;Ndr1;Ndr1;Tdd5   | T328  | 1           | 1             | TASGSSVTSLEGTR      | T(0.975)AS(0.025)GSSV  | T(ph)ASGSSVTSLEGTR     | PKA/AKT         | 1.8                       | 0.0025862      | Up         | Yes                    |    |
| 709  | IPI00462445 | E3 ubiquitin-protein lig | Nedd4;Kiaa0093;Nedd   | S281  | 1           | 3             | RSPDDDLTDEDNDMM     | RPS(0.932)PDDDLT(O.0   | RPS(ph)PDDDLTDEDN      | PKA             | 1.0                       | 0.35467        |            | Yes                    |    |
| 992  | IPI00462445 | E3 ubiquitin-protein lig | Nedd4;Kiaa0093;Nedd   | S309  | 1           | 4             | RQISEDVDPDNR        | RQIS(1)EDVDPDNR        | RQIS(ph)EDVDPDNR       | CAMK2           | 1.1                       | 0.47297        |            | Yes                    |    |
| 810  | IPI00462445 | E3 ubiquitin-protein lig | Nedd4;Kiaa0093;Nedd   | T287  | 1           | 9             | RPSDDDLTDEDNDMM     | RSPDDDLT(1)DEDND       | RSPDDDLT(ph)DEDN       | FHA1 Rad53p     | 1.0                       | 0.39561        |            | Yes                    |    |
| 568  | IPI00649115 | E3 ubiquitin-protein lig | Nedd4;Kiaa0439;Nedd   | S475  | 1           | 1             | SLSSPTVLSAPLEGAK    | S(0.533)LS(0.395)S(O.0 | S(ph)LSPTVLSAPLEG      | PKD             | 1.2                       | 0.28524        |            | No                     |    |
| 917  | IPI00127241 | Serine/threonine-prote   | Nek3                  | T477  | 1           | 6             | LDEEDTDFEEDNENPDW   | LDEEDT(1)DFEEDNENP     | LDEEDT(ph)DFEEDNE      | CK2             | 1.1                       | 0.446          |            | Yes                    |    |
| 173  | IPI00131415 | Nuclear factor 1 A-type  | Nfia;Nfia;Nfia;Nfia   | S310  | 1           | 8             | SVEDEMDSPGEEPFYTG   | SVEDEMDS(1)PGEPEFY     | SVEDEMDS(ph)PGEEP      | CK2             | 0.8                       | 0.0388         | Down       | Yes                    |    |
| 378  | IPI00130129 | Nuclear factor 1 B-type  | Nfib;Nfib;Nfib;Nfib   | S312  | 1           | 6             | DDMSSPTTMM          | DDMSS(0.003)S(0.966)   | DDMSS(ph)PTTMM_        | Polo box        | 1.3                       | 0.18755        |            | Yes                    |    |
| 1235 | IPI00130129 | Nuclear factor 1 B-type  | Nfib;Nfib;Nfib;Nfib   | S325  | 1           | 8             | KPEKPLFSSTSPQDSSPR  | KPEKPLFS(0.24)S(0.24)  | KPEKPLFS(ph)STSPQDSSPR |                 |                           |                |            | No                     |    |
| 1238 | IPI00130129 | Nuclear factor 1 B-type  | Nfib;Nfib;Nfib;Nfib   | S326  | 1           | 9             | KPEKPLFSSTSPQDSSPR  | KPEKPLFS(0.24)S(0.24)  | KPEKPLFS(ph)STSPQD     | NEK6            |                           |                |            | No                     |    |
| 336  | IPI00130129 | Nuclear factor 1 B-type  | Nfib;Nfib;Nfib;Nfib   | S328  | 1           | 11            | KPEKPLFSSTSPQDSSPR  | KPEKPLFS(0.009)T(O.0   | KPEKPLFSST(ph)PQD      | CK1             | 0.9                       | 0.15764        |            | Yes                    |    |
| 703  | IPI00130129 | Nuclear factor 1 B-type  | Nfib;Nfib;Nfib;Nfib   | S332  | 1           | 15            | KPEKPLFSSTSPQDSSPR  | KPEKPLFS(0.073)S(0.05  | KPEKPLFSSTSPQDSS       | ph CK1          | 1.2                       | 0.35155        |            | No                     |    |
| 1242 | IPI00130129 | Nuclear factor 1 B-type  | Nfib;Nfib;Nfib;Nfib   | S333  | 1           | 16            | KPEKPLFSSTSPQDSSPR  | KPEKPLFSST(0.001)PQ    | KPEKPLFSSTSPQDSS       | (ph)Polo box    |                           |                |            | No                     |    |
| 243  | IPI00130129 | Nuclear factor 1 B-type  | Nfib;Nfib;Nfib;Nfib   | T327  | 1           | 10            | KPEKPLFSSTSPQDSSPR  | KPEKPLFS(0.058)S(0.05  | KPEKPLFSST(ph)SPQDSSPR |                 | 0.9                       | 0.086901       |            | No                     |    |
| 326  | IPI00137501 | Nuclear factor 1 C-type  | Nfic;Nfic;Nfic;Nfic   | S322  | 1           | 11            | NWTEDEIEGGISPVKK    | NWTEDEIEGGIS(0.5)S(O   | NWTEDEIEGGIS(ph)SPVK   |                 | 1.3                       | 0.14743        |            | No                     |    |
| 327  | IPI00137501 | Nuclear factor 1 C-type  | Nfic;Nfic;Nfic;Nfic   | S323  | 1           | 12            | NWTEDEIEGGISPVKK    | NWTEDEIEGGIS(0.5)S(O   | NWTEDEIEGGIS(ph)SPV    | Polo box        | 1.3                       | 0.14743        |            | No                     |    |
| 997  | IPI00331515 | Nuclear factor 1;Nuclea  | Nfix;Nfix;Nfix        | S366  | 1           | 18            | MAFTHHPLPVLAVRPG    | MAFTHHPLPVLAVRPG       | M(ox)AFTHHPLPVLAV      | PKC             | 1.1                       | 0.47634        |            | Yes                    |    |
| 544  | IPI00331515 | Nuclear factor 1;Nuclea  | Nfix;Nfix;Nfix;Nfix   | S285  | 1           | 1             | SIDSEMEESPVDVFPYG   | S(0.607)IDD5(0.393)EM  | S(ph)IDSEMEESPVDV      | PKA             | 1.2                       | 0.27349        |            | No                     |    |
| 412  | IPI00123474 | Nuclear factor NF-kapp   | Nfkb2                 | T425  | 1           | 13            | DTDAGEGAEPRTPPEEA   | DTDAGEGAEPRT(1)PP      | DTDAGEGAEPRT(ph)       | WW GroupIV      | 1.0                       | 0.2134         |            | Yes                    |    |
| 1014 | IPI00421052 | Nipped-B-like protein;C  | Nipbl;Nipbl           | S2652 | 1           | 10            | AITSLGGGSPK         | AITSLGGGS(1)PK         | _AITSLGGG(ph)PK_       | CDK1            | 1.1                       | 0.48274        |            | Yes                    |    |
| 1222 | IPI00461536 | Nucleolar protein 8      | Nol8                  | S315  | 2           | 1             | SSMSDDVDSEDELK      | S(0.402)S(0.299)MS(O.2 | S(ph)SM(ox)SDDVDSD     | (ph)EDELK_      |                           |                |            | No                     |    |
| 626  | IPI00461536 | Nucleolar protein 8      | Nol8                  | S324  | 2           | 10            | SSMSDDVDSEDELK      | S(0.402)S(0.299)MS(O.2 | S(ph)SM(ox)SDDVDSD     | CK2             | 1.2                       | 0.31441        |            | Yes                    |    |
| 944  | IPI00720058 | MKIAA0035 protein;Pu     | Nolc1;MKIAA0035;Nolc  | S563  | 1           | 5             | AAKESEEEEEETEKK     | AAKES(1)EEEEEEEEETE    | AAKES(ph)EEEEEEEE      | CK2             | 1.1                       | 0.45445        |            | Yes                    |    |
| 509  | IPI00311453 | Putative ribosomal RN    | Nop2;Nol1             | T169  | 1           | 15            | AQDATAGVLWNEEDTD    | AQDATAGVLWNEEDT(C      | AQDATAGVLWNEEDT        | FHA1 Rad53p     | 1.0                       | 0.26113        |            | Yes                    |    |
| 939  | IPI00318048 | Nucleolar protein 56;N   | Nop56;Nol5a;Nol5a;RP  | S513  | 1           | 5             | EELASDLEEMATSSAK    | EELAS(1)DLEEMATSSAK    | EELAS(ph)DLEEMATSS     | CK2             | 1.1                       | 0.45239        |            | Yes                    |    |
| 1191 | IPI00318048 | Nucleolar protein 56;N   | Nop56;Nol5a;Nol5a;RP  | S521  | 1           | 16            | APKEELASDLEEMATSSA  | APKEELAS(0.058)DLEEN   | APKEELASDLEEMAT        | (ph)SSAK        |                           |                |            | No                     |    |
| 1194 | IPI00318048 | Nucleolar protein 56;N   | Nop56;Nol5a;Nol5a;RP  | S522  | 1           | 17            | APKEELASDLEEMATSSA  | APKEELAS(0.058)DLEEN   | APKEELASDLEEMAT        | (ph)SSAK        |                           |                |            | No                     |    |
| 357  | IPI00318048 | Nucleolar protein 56;N   | Nop56;Nol5a;Nol5a;RP  | S529  | 2           | 3             | KSSPKEEVAEPEEAAASPT | KS(0.142)S(0.858)PKEE  | KSS(ph)PKEEVAAS(ph)    | E Polo box      | 1.3                       | 0.17259        |            | Yes                    |    |
| 863  | IPI00318048 | Nucleolar protein 56;N   | Nop56;Nol5a;Nol5a;RP  | S536  | 1           | 5             | EEVASEPEEAAASPTPK   | EEVAS(1)EEPEEAAASPTP   | EEVAS(ph)EEPEEAAASPT   | CK2             | 1.1                       | 0.4217         |            | Yes                    |    |
| 916  | IPI00318048 | Nucleolar protein 56;N   | Nop56;Nol5a;Nol5a;RP  | S543  | 2           | 12            | EEVASEPEEAAASPTPK   | EEVAS(1)EEPEEAAAS(0.75 | EEVAS(ph)EEPEEAAAS     | (ph)PTTPK       | 1.1                       | 0.44591        |            | Yes                    |    |
| 776  | IPI00318048 | Nucleolar protein 56;N   | Nop56;Nol5a;Nol5a;RP  | T520  | 1           | 16            | KAPKEELASDLEEMATSS  | KAPKEELAS(0.002)DLEE   | KAPKEELASDLEEMAT       | (ph)FHA KAPP    | 1.2                       | 0.38202        |            | Yes                    |    |
| 454  | IPI00463468 | Nucleolar protein 58;N   | Nop58;Nol5            | S509  | 1           | 8             | HIKEEPLSEEEPTSTAVP  | HIKEEPLS(1)EEEPCTSTA   | HIKEEPLS(ph)EEEPCT     | CK2             | 1.2                       | 0.23491        |            | No                     |    |
| 1202 | IPI00463468 | Nucleolar protein 58;N   | Nop58;Nol5            | S516  | 1           | 15            | HIKEEPLSEEEPTSTAVP  | HIKEEPLS(0.002)EEEPCT  | HIKEEPLSEEEPTCT        | (ph)STAVPSPEKK_ |                           |                |            | Yes                    |    |
| 772  | IPI00463468 | Nucleolar protein 58;N   | Nop58;Nol5            | S521  | 1           | 20            | HIKEEPLSEEEPTSTAVP  | HIKEEPLS(0.089)EEEPCT  | HIKEEPLSEEEPTCT        | (ph)SERK/MAPK   | 1.2                       | 0.37952        |            | No                     |    |
| 1209 | IPI00463468 | Nucleolar protein 58;N   | Nop58;Nol5            | T515  | 1           | 14            | HIKEEPLSEEEPTSTAVP  | HIKEEPLS(0.002)EEEPCT  | HIKEEPLSEEEPTCT        | (ph)FHA KAPP    |                           |                |            | No                     |    |
| 1214 | IPI00463468 | Nucleolar protein 58;N   | Nop58;Nol5            | T517  | 1           | 16            | HIKEEPLSEEEPTSTAVP  | HIKEEPLS(0.002)EEEPCT  | HIKEEPLSEEEPTCT        | (ph)STAVPSPEKK  |                           |                |            | No                     |    |
| 404  | IPI00127415 | Nucleophosmin;Nucleo     | Npm1;Npm1;Npm1;RP     | S70   | 1           | 25            | TVSLGAGAKDELHIVEAE  | T(0.001)VS(0.001)LGAG  | TVSLGAGAKDELHIVEA      | CDK2            | 1.3                       | 0.20948        |            | Yes                    |    |
| 13   | IPI00127415 | Nucleophosmin;Nucleo     | Npm1;Npm1;Npm1;RP     | T75   | 1           | 30            | TVSLGAGAKDELHIVEAE  | T(0.056)VS(0.06)LGAG   | TVSLGAGAKDELHIVEA      | AURORA          | 0.1                       | 8.074E-39      | Down       | No                     |    |
| 14   | IPI00127415 | Nucleophosmin;Nucleo     | Npm1;Npm1;Npm1;RP     | T78   | 1           | 33            | TVSLGAGAKDELHIVEAE  | T(0.056)VS(0.06)LGAG   | TVSLGAGAKDELHIVEA      | EAMNYEGSPIKVT   | (ph)LA                    | 0.1            | 8.074E-39  | Down                   | No |
| 296  | IPI00856881 | Glucocorticoid recepto   | Nr3c1;Nr3c1;Gr1;Gr1   | N168  | 1           | 10            | SSTPAAGCATPTEKEFPQ  | SSTPAAGCAT(0.838)PT    | SSTPAAGCAT(ph)PTEK     | CK2             | 1.8                       | 0.0012795      | Up         | Yes                    |    |
| 286  | IPI00664246 | Putative uncharacterize  | Nrbp1;Nrbp;Nrbp1;Ma   | T439  | 1           | 1             | TPTPEPAEVETR        | T(0.643)PT(0.357)PEPA  | T(ph)TPTPEPAEVETR      | ERK/MAPK        | 1.3                       | 0.11473        |            | Yes                    |    |
| 373  | IPI00664246 | Putative uncharacterize  | Nrbp1;Nrbp;Nrbp1;Ma   | T441  | 1           | 3             | TPTPEPAEVETR        | T(0.006)PT(0.994)PEPA  | TPT(ph)PEPAEVETR       |                 | 1.3                       | 0.18431        |            | Yes                    |    |
| 254  | IPI00648408 | Nardilysin, N-arginine d | Nrd1;RP23-188A12.1-0  | S85   | 1           | 6             | LGAESEEEGR          | LGADES(1)EEEGR         | LGADES(ph)EEEGR        | CK2             | 0.9                       | 0.098462       |            | Yes                    |    |
| 661  | IPI00387232 | NSFL1 cofactor p47;p9    | Nsfl1c;Nsf1c;Nsf1c;Ns | S116  | 1           | 3             | KKSPNELVDDLK        | KKS(1)PNELVDDLK        | _KKS(ph)PNELVDDLK_     | PKA             | 1.2                       | 0.33424        |            | Yes                    |    |
| 240  | IPI00894870 | tRNA (cytosine-5)-met    | Nsun2;D13Wsu123e;M    | S23   | 1           | 15            | RFQPPQPEGEEDASDG    | RFQPPQPEGEEDAS(1)      | RFQPPQPEGEEDAS         | (ph)DGGR        | 0.9                       | 0.084595       |            | Yes                    |    |
| 934  | IPI00894870 | tRNA (cytosine-5)-met    | Nsun2;D13Wsu123e;M    | S723  | 1           | 12            | EGVILTNNENASPEQPGD  | EGVILT(N)ENASAS(1)PEQ  | EGVILTNNENASAS         | (ph)PEQPGDEDAK  | 1.1                       | 0.45035        |            | Yes                    |    |
| 1039 | IPI00894870 | tRNA (cytosine-5)-met    | Nsun2;D13Wsu123e;M    | T717  | 1           | 6             | EGVILTNNENASPEQPGD  | EGVILT(1)ENASAS(0.0    | (ca)EGVILT(ph)NNENAS   | PEQPGDEDAK_     | 1.1                       | 0.49101        |            | No                     |    |
| 307  | IPI00132314 | Nucleobindin-1;CALNU     | Nucb1;Nuc;Nucb;Nucb   | S81   | 1           | 1             | SGKLSQELDFVSHNVR    | S(0.893)GKLS(0.107)QE  | S(ph)GKLSQELDFVSHN     | GSK3            | 1.3                       | 0.13325        |            | Yes                    |    |
| 292  | IPI00132314 | Nucleobindin-1;CALNU     | Nucb1;Nuc;Nucb;Nucb   | S85   | 1           | 5             | SGKLSQELDFVSHNVR    | SGKLS(1)QELDFVSHNVR    | SGKLS(ph)QELDFVSHN     | CK1             | 1.3                       | 0.1221         |            | Yes                    |    |
| 1171 | IPI00132314 | Nucleobindin-1;CALNU     | Nucb1;Nuc;Nucb;Nucb   | S92   | 1           | 12            | SGKLSQELDFVSHNVR    | S(0.272)GKLS(0.261)QE  | SGKLSQELDFVSHNVR       |                 |                           |                |            | No                     |    |
| 1320 | IPI00341869 | Nuclear ubiquitinous cas | Nucks1;Nucks          | S14   | 1           | 6             | KVVDYSQFQESDDADEDY  | KVVDY(0.078)S(0.461)Q  | (ca)KVVDYS(ph)QFQESDD  | DADEDYGR_       |                           |                |            | No                     |    |
| 668  | IPI00341869 | Nuclear ubiquitinous cas | Nucks1;Nucks          | S19   | 1           | 10            | VVDYSQFQESDDADEDY   | VVDYSQFQES(1)DDADE     | VVDYSQFQES(ph)DDADE    | DADEDYGR        | 1.2                       | 0.33938        |            | Yes                    |    |
| 388  | IPI00341869 | Nuclear ubiquitinous cas | Nucks1;Nucks          | S214  | 1           | 8             | EEDEEAESPEPKK       | EEDEEAES(1)PEPKK       | EEDEEAES(ph)PEPKK      | CK2             | 1.3                       | 0.19373        |            | Yes                    |    |
| 361  | IPI00341869 | Nuclear ubiquitinous cas | Nucks1;Nucks          | S58   | 1           | 6             | NSQEDSEDESEKDKV     | NSQEDS(0.986)EDS(O.0   | NSQEDS(ph)EDSEKDK      | CK1             | 1.3                       | 0.17803        |            | Yes                    |    |
| 650  | IPI00341869 | Nuclear ubiquitinous cas | Nucks1;Nucks          | S61   | 2           | 9             | NSQEDSEDESEKDKV     | NS(0.002)QEDS(0.998)   | NSQEDS(ph)EDS(ph)E     | CK1             | 1.2                       | 0.32842        |            | Yes                    |    |
| 1053 | IPI00130438 | 7,8-dihydro-8-oxoguan    | Nudt1;Mth1            | S2    | 2           | 2             | MSTSRlyTLVVLVLPQQR  | MS(0.385)T(0.385)S(O.2 | MS(ph)TSLRly(ph)TLVVL  | LPQQR           |                           |                |            | No                     |    |
| 1054 | IPI00130438 | 7,8-dihydro-8-oxoguan    | Nudt1;Mth1            | S4    | 2           | 2             | MSTSRlyTLVVLVLPQQR  | MS(0.339)T(0.339)S(O.2 | MS(ph)TSLRly(ph)TLVVL  | LPQQR           |                           |                |            | No                     |    |
| 1055 | IPI00130438 | 7,8-dihydro-8-oxoguan    | Nudt1;Mth1            | T3    | 2           | 3             | MSTSRlyTLVVLVLPQQR  | MS(0.385)T(0.385)S(O.2 | MS(ph)TSLRly(ph)TLVVL  | FHA2 Rad53p     |                           |                |            | No                     |    |
| 1056 | IPI00130438 | 7,8-dihydro-8-oxoguan    | Nudt1;Mth1            | T8    | 2           | 8             | MSTSRlyTLVVLVLPQQR  | MS(0.334)T(0.334)S(O.2 | MS(ph)TSLRly(ph)TLVVL  | CAMK2           |                           |                |            | No                     |    |
| 4    | IPI00130438 | 7,8-dihydro-8-oxoguan    | Nudt1;Mth1            | Y7    | 2           | 7             | MSTSRlyTLVVLVLPQQR  | MS(0.385)T(0.385)S(O.2 | MS(ph)TSLRly(ph)TLVVL  | ALK             | 0.02                      | 1E-109         | Down       | No                     |    |
| 360  | IPI00263048 | Putative uncharacterize  | Numa1                 | S1739 | 1           | 14            | TQPDGTSVPGEPASPI    | TQPDGTSVPGEPAS(O.9     | TQPDGTSVPGEPAS         | (ph)WW GroupIV  | 1.3                       | 0.17483        |            | Yes                    |    |
| 1318 | IPI00263048 | Putative uncharacterize  | Numa1                 | S1742 | 1           | 17            | TQPDGTSVPGEPASPI    | T(0.029)QPDGT(0.031)   | TQPDGTSVPGEPAS         | (ph)CK1         |                           |                |            | No                     |    |



| No   | IPI Numbers | Protein Names            | Gene Names            | pAA   | Number of P | Position in p | Peptide Sequence     | Phospho (STY) Probabi   | Modified Sequence        | Best Motif           | Ratio <sup>1</sup> of Phd | Ratio Signifid | Up-/Down-r | Localized phosphosite? |
|------|-------------|--------------------------|-----------------------|-------|-------------|---------------|----------------------|-------------------------|--------------------------|----------------------|---------------------------|----------------|------------|------------------------|
| 1271 | IPI00129535 | Nuclear pore complex     | Nup160;Gtl1-13;Kiaa0  | S1113 | 1           | 14            | LIRPEYAWIVQPASGAVS   | LIRPEY(0.225)AWIVQPA    | LIRPEYAWIVQPAS(ph)       | GSK3                 |                           |                |            | No                     |
| 1274 | IPI00129535 | Nuclear pore complex     | Nup160;Gtl1-13;Kiaa0  | S1117 | 1           | 18            | LIRPEYAWIVQPASGAVS   | LIRPEY(0.225)AWIVQPA    | LIRPEYAWIVQPAS(ph)       | CK1                  |                           |                |            | No                     |
| 483  | IPI00129535 | Nuclear pore complex     | Nup160;Gtl1-13;Kiaa0  | S1123 | 1           | 24            | LIRPEYAWIVQPASGAVS   | LIRPEYAWIVQPAS(0.00)    | LIRPEYAWIVQPASGAV        | CDK2                 | 1.2                       | 0.24944        |            | Yes                    |
| 1280 | IPI00129535 | Nuclear pore complex     | Nup160;Gtl1-13;Kiaa0  | Y1105 | 1           | 6             | LIRPEYAWIVQPASGAVS   | LIRPEY(0.331)AWIVQPA    | LIRPEY(ph)AWIVQPAS       | ALK                  |                           |                |            | No                     |
| 213  | IPI00474558 | Nup98 protein;Nup98      | Nup98;Nup98           | S297  | 1           | 6             | YGLQDSDEEEEEHPKK     | Y(0.007)GLQDS(0.993)I   | YGLQDS(ph)DEEEEEH        | CK2                  | 1.4                       | 0.063441       |            | Yes                    |
| 365  | IPI00474558 | Nup98 protein;Nup98      | Nup98;Nup98           | S436  | 1           | 16            | FGHIPKGETVQVEICSPR   | FGHIPKGETE(0.002)VQ     | FGHIPKGETVQVEICSP        | CDK1                 | 1.3                       | 0.18047        |            | Yes                    |
| 1218 | IPI00869414 | NACHT and WD repeat      | Nwd1                  | S1484 | 3           | 5             | IIPTSNMGFMAPTSHGYLIR | IIPT(0.585)S(0.585)NGF  | (ca)IIPT(ph)S(ph)NGFM    | (ox)APTS(HG)Y(ph)LIR |                           |                |            | No                     |
| 1221 | IPI00869414 | NACHT and WD repeat      | Nwd1                  | S1492 | 3           | 13            | IIPTSNMGFMAPTSHGYLIR | IIPT(0.585)S(0.585)NGF  | (ca)IIPT(ph)S(ph)NGFM    | (ox)APTS(HG)Y(ph)LIR |                           |                |            | No                     |
| 1227 | IPI00869414 | NACHT and WD repeat      | Nwd1                  | Y1495 | 3           | 16            | IIPTSNMGFMAPTSHGYLIR | IIPT(0.585)S(0.585)NGF  | (ca)IIPT(ph)S(ph)NGFM    | (ox)APTS(HG)Y(ph)LIR |                           |                |            | Yes                    |
| 1072 | IPI00750945 | Outer dense fiber prote  | Odf2;Odf84;Odf2;Odf8  | S49   | 1           | 1             | SSTPLPHVHVVDENTPVHH  | S(0.374)S(0.313)T(0.31) | S(ph)STPLPHVHVVDENTPVHH  |                      |                           |                |            | No                     |
| 1065 | IPI00162970 | Olfactory receptor 62    | OlfR2;RP23-154A15.3   | S140  | 1           | 6             | YKIVMSPLLR           | YKIVMS(1)PLLR           | YKIVM(ox)S(ph)PLLR       |                      |                           |                |            | Yes                    |
| 710  | IPI00918049 | Oxysterol-binding prote  | Osbp11                | S188  | 1           | 6             | SFSLASSGNPISQQR      | S(0.004)FS(0.004)LAS(0  | SFSLAS(ph)SGNSPISQQR     | CK1                  | 1.0                       | 0.35529        |            | Yes                    |
| 800  | IPI00918049 | Oxysterol-binding prote  | Osbp11                | S192  | 1           | 10            | SFSLASSGNPISQQR      | S(0.001)FS(0.001)LAS(0  | SFSLASSGN(ph)PISQQR      | CK1                  | 1.0                       | 0.39245        |            | Yes                    |
| 1143 | IPI00462728 | MKIAA0704 protein;Ox     | Osbp13;mkIAA0704;Osi  | S302  | 1           | 3             | LHSSNPNLSTLDFGEEK    | LHS(0.498)S(0.498)NPN   | LHS(ph)SNPNLSTLDFG       | CAMK2                |                           |                |            | No                     |
| 1145 | IPI00462728 | MKIAA0704 protein;Ox     | Osbp13;mkIAA0704;Osi  | S303  | 1           | 4             | LHSSNPNLSTLDFGEEK    | LHS(0.498)S(0.498)NPN   | LHS(ph)SNPNLSTLDFG       | NEK6                 |                           |                |            | No                     |
| 1069 | IPI00221706 | Osteopetrosis-associat   | Ostm1;Gl              | S329  | 1           | 4             | SSTSFAHQENAT         | S(0.016)S(0.012)T(0.01  | SSTS(ph)FAHQENAT         | CK1                  |                           |                |            | No                     |
| 265  | IPI00463065 | Novel protein similar to | OTTMUSG0000001914     | S384  | 1           | 3             | DASPPGSEPEIDR        | DAS(1)PPGSEPEIDR        | DAS(ph)PPGSEPEIDR        | CAMK2                | 1.4                       | 0.10341        |            | Yes                    |
| 191  | IPI00463065 | Novel protein similar to | OTTMUSG0000001914     | S388  | 2           | 7             | DASPPGSEPEIDR        | DAS(1)PPGSEPEIDR        | DAS(ph)PPGSEPEIDR        | CK2                  | 1.5                       | 0.048633       | Up         | Yes                    |
| 62   | IPI00654216 | Putative uncharacterize  | Oxr1;Oxr1;C7;Gm1238   | S194  | 1           | 3             | VVSTSEEEEEAFTEK      | VVVS(0.994)S(0.001)T(0  | VVVS(ph)TSEEEEEAFTEK     | CAMK2                | 2.3                       | 5.448E-06      | Up         | Yes                    |
| 70   | IPI00654216 | Putative uncharacterize  | Oxr1;Oxr1;C7;Gm1238   | S195  | 1           | 4             | VVSTSEEEEEAFTEK      | VVVS(0.071)S(0.851)T(0  | VVVS(ph)TSEEEEEAFTEK     | CK2                  | 2.1                       | 5.388E-05      | Up         | Yes                    |
| 819  | IPI00119305 | Proliferation-associate  | Pa2g4;Ebp1;Pifap      | S2    | 1           | 1             | SGEDEQQEQTIAEDLVV    | S(1)GEDEQQEQTIAEDLVV    | S(ph)GEDEQQEQTIAEDLVV    | VTK                  | 1.1                       | 0.39936        |            | Yes                    |
| 912  | IPI00229884 | Serine/threonine-prote   | Pak2                  | S141  | 1           | 3             | YLSFTTPEEK           | YLS(0.997)FT(0.003)PP   | YLS(ph)FTTPEEK           |                      | 1.1                       | 0.44405        |            | Yes                    |
| 284  | IPI00830990 | p21 (CDKN1A)-activate    | Pak3;RP23-4506.1-009  | S207  | 1           | 12            | TASEPPLAPPVSEEEEEE   | TASEPPLAPPV(1)EEED      | TASEPPLAPPV(ph)EE        | CK2                  | 0.9                       | 0.11283        |            | Yes                    |
| 77   | IPI00129298 | Paralemmin;Paralemm      | Palm;Palm             | T141  | 2           | 10            | SETLVNAQQTPLGTGPK    | SETLVNAQQT(1)PLGT(1)    | SETLVNAQQT(ph)PLGT(ph)PK |                      | 0.6                       | 0.0002022      | Down       | Yes                    |
| 78   | IPI00129298 | Paralemmin;Paralemm      | Palm;Palm             | T145  | 2           | 14            | SETLVNAQQTPLGTGPK    | SETLVNAQQT(1)PLGT(1)    | SETLVNAQQT(ph)PLGT(ph)PK |                      | 0.6                       | 0.0002022      | Down       | Yes                    |
| 158  | IPI00470003 | Alpha-parvin;Actopaxin   | Parva;Actp;MNCb-030   | S14   | 1           | 1             | SPTPKPSSR            | S(0.507)PT(0.076)PKS(0  | (ca)S(ph)PTPKPSSR        | WW GroupIV           | 0.8                       | 0.028085       | Down       | No                     |
| 174  | IPI00470003 | Alpha-parvin;Actopaxin   | Parva;Actp;MNCb-030   | T116  | 2           | 9             | SPLVPKSPTPKSPSSR     | SPLVPKS(0.215)PT(0.79   | SPLVPKSPTPKSPSSR         | PKS(ph)CDK1          | 1.5                       | 0.038965       | Up         | Yes                    |
| 1298 | IPI00127707 | Poly(rC)-binding protei  | Pcbp2;Cbp;Hnrnp;Hnr   | S183  | 1           | 11            | GVTIYRPRKPSVIFAG     | GVTI(0.001)PY(0.022)R   | GVTIYRPRKPS(ph)S         | SPVIFAGGQDR          |                           |                |            | No                     |
| 922  | IPI00127707 | Poly(rC)-binding protei  | Pcbp2;Cbp;Hnrnp;Hnr   | S184  | 1           | 12            | GVTIYRPRKPSVIFAG     | GVTIYRPRKPS(0.133)S(0   | GVTIYRPRKPS(ph)S         | SPVIFAGGQDR          | 1.1                       | 0.44715        |            | No                     |
| 1303 | IPI00127707 | Poly(rC)-binding protei  | Pcbp2;Cbp;Hnrnp;Hnr   | S185  | 1           | 13            | GVTIYRPRKPSVIFAG     | GVTIY(0.001)RPKPS(0     | GVTIYRPRKPS(ph)S         | Polo box             |                           |                |            | No                     |
| 393  | IPI00828325 | Pericentriolar material  | Pcm1;Pcm1             | S65   | 1           | 6             | VTNAISPESPGVGR       | VTNAIS(1)PESPGVGR       | VTNAIS(ph)PESPGVGR       | GSK3                 | 1.3                       | 0.2016         |            | Yes                    |
| 366  | IPI00828325 | Pericentriolar material  | Pcm1;Pcm1             | S69   | 2           | 10            | VTNAISPESPGVGR       | VT(0.218)NAIS(0.744)P   | VTNAIS(ph)PES(ph)P       | Polo box             | 0.9                       | 0.18082        |            | Yes                    |
| 306  | IPI00115490 | Choline-phosphate cyti   | Pcyt1a;Ctptc;Pcyt1    | S315  | 1           | 6             | MLQAISPK             | MLQAIS(1)PK             | M(ox)LQAIS(ph)PK         | CDK1                 | 0.9                       | 0.13221        |            | Yes                    |
| 1003 | IPI00352475 | 28 kDa heat- and acid-s  | Pdap1                 | S57   | 2           | 1             | SLDSDSEDEDDDDYQQK    | S(0.711)LDS(0.289)DES   | S(ph)LDSDES(ph)EDE       | AURORA               | 1.1                       | 0.47813        |            | No                     |
| 1004 | IPI00352475 | 28 kDa heat- and acid-s  | Pdap1                 | S63   | 2           | 7             | SLDSDSEDEDDDDYQQK    | S(0.711)LDS(0.289)DES   | S(ph)LDSDES(ph)EDE       | CK2                  | 1.1                       | 0.47813        |            | Yes                    |
| 921  | IPI00551454 | Protein RRP5 homolog;    | Pdcd11;Alg4;Kiaa0185  | S1490 | 1           | 10            | KSGAAEEDDSGVVYR      | KS(0.005)GAAEEDDS(0     | KSGAAEEDDS(ph)GVE        | CK2                  | 1.1                       | 0.44706        |            | Yes                    |
| 36   | IPI00323064 | Programmed cell death    | Pdcd4;Ma3;Tis         | S457  | 1           | 4             | RFVSEGGDGR           | RFVS(1)EGDGGRR          | RFVS(ph)EGDGGRR          | PKA/AKT              | 3.8                       | 2.594E-13      | Up         | Yes                    |
| 39   | IPI00323064 | Programmed cell death    | Pdcd4;Ma3;Tis         | S76   | 1           | 7             | DSGRGDSVSDNGSEAVR    | DSGRGDS(0.988)VS(0.0    | DSGRGDS(ph)VSDNGS        | CAMK2                | 3.5                       | 1.363E-11      | Up         | Yes                    |
| 779  | IPI00323064 | Programmed cell death    | Pdcd4;Ma3;Tis         | S94   | 1           | 8             | SGVAVPTSPK           | SGVAVPT(0.072)S(0.92    | SGVAVPT(ph)PK            | WW GroupIV           | 1.1                       | 0.38387        |            | Yes                    |
| 547  | IPI00323064 | Programmed cell death    | Pdcd4;Ma3;Tis         | T93   | 1           | 7             | SGVAVPTSPK           | SGVAVPT(0.913)S(0.08    | SGVAVPT(ph)SPK           |                      | 1.2                       | 0.27483        |            | Yes                    |
| 852  | IPI00885252 | Programmed cell death    | Pdcd5;Tfar19          | S198  | 1           | 5             | KVMDSDEDDADY         | KVMDS(1)DEDDADY         | KVM(ox)DS(ph)DEDDADY     |                      | 1.1                       | 0.41782        |            | Yes                    |
| 654  | IPI00885252 | Programmed cell death    | Pdcd5;Tfar19          | Y205  | 1           | 13            | RKVMDSDEDDADY        | RKVMDS(0.5)DEDDADY      | RKVMDS(ph)DEDDADY        |                      | 1.2                       | 0.3309         |            | No                     |
| 137  | IPI00337893 | Pyruvate dehydrogenase   | Pdha1;Pdha-1          | S232  | 1           | 6             | YGMGTSVER            | YGMGT(0.039)S(0.961)    | YGMGT(S)ph)VER           |                      | 0.7                       | 0.012838       | Down       | Yes                    |
| 262  | IPI00337893 | Pyruvate dehydrogenase   | Pdha1;Pdha-1          | S293  | 1           | 5             | YHGHSMDPVGYSYR       | YHGHS(0.995)MS(0.005    | YHGHS(ph)MDPVGYSYR       |                      | 1.4                       | 0.10133        |            | Yes                    |
| 1036 | IPI00337893 | Pyruvate dehydrogenase   | Pdha1;Pdha-1          | S295  | 1           | 7             | YHGHSMDPVGYSYR       | Y(0.007)HGHS(0.178)M    | YHGHSM(ox)S(ph)DPVGYSYR  |                      | 1.1                       | 0.48975        |            | Yes                    |
| 226  | IPI00337893 | Pyruvate dehydrogenase   | Pdha1;Pdha-1          | S300  | 2           | 12            | YHGHSMDPVGYSYR       | Y(0.592)HGHS(0.404)M    | Y(ph)HGHSMDPVGVS(ph)YR   |                      | 0.8                       | 0.072601       |            | Yes                    |
| 104  | IPI00337893 | Pyruvate dehydrogenase   | Pdha1;Pdha-1          | T231  | 1           | 5             | YGMGTSVER            | YGMGT(0.5)S(0.5)VER     | YGMGT(ph)SVER            | CK2                  | 0.7                       | 0.0016225      | Down       | No                     |
| 196  | IPI00337893 | Pyruvate dehydrogenase   | Pdha1;Pdha-1          | Y289  | 2           | 1             | YHGHSMDPVGYSYR       | Y(0.592)HGHS(0.404)M    | Y(ph)HGHSMDPVGVS(ph)YR   |                      | 1.4                       | 0.054334       |            | Yes                    |
| 1116 | IPI00337893 | Pyruvate dehydrogenase   | Pdha1;Pdha-1          | Y301  | 2           | 13            | YHGHSMDPVGYSYR       | Y(0.141)HGHS(0.753)M    | YHGHS(ph)MDPVGVS(ph)YR   |                      |                           |                |            | No                     |
| 171  | IPI00222496 | Protein disulfide-isome  | Pdia6;Txndc7          | S433  | 1           | 13            | DGELPVEDDIDLSVDL     | DGELPVEDDIDLS(1)DVE     | DGELPVEDDIDLS(ph)D       | CK2                  | 0.8                       | 0.036903       | Down       | Yes                    |
| 368  | IPI00153375 | PDZ and LIM domain pr    | Pdlim2;Pdlim2         | S204  | 1           | 10            | VLLHSPGRPSSR         | VLLHS(0.032)PGRPS(0.5   | (ca)VLLHSPGRPS(ph)S      | PKA                  | 0.9                       | 0.18123        |            | Yes                    |
| 558  | IPI00153375 | PDZ and LIM domain pr    | Pdlim2;Pdlim2         | S205  | 1           | 11            | VLLHSPGRPSSR         | VLLHS(0.001)PGRPS(0     | VLLHSPGRPS(ph)PR         | PKC                  | 1.0                       | 0.28019        |            | Yes                    |
| 478  | IPI00323609 | 3-phosphoinositide-deg   | Pdpk1;Pdk1;Pdpk1;Pdg  | S244  | 1           | 3             | ANSFVGTAAQVSPPELLTE  | ANS(1)FVGTAAQVSPPELL    | ANS(ph)FVGTAAQVSP        | CAMK2                | 1.0                       | 0.24617        |            | Yes                    |
| 815  | IPI00845638 | Sister chromatid cohes   | Pds5b;Aprin;As3;Kiaa0 | S1358 | 1           | 3             | AESPETSAVESTQSTPQK   | AES(1)PETSAVESTQSTP     | AES(ph)PETSAVESTQS       | CAMK2                | 1.1                       | 0.39803        |            | Yes                    |
| 1146 | IPI00845638 | Sister chromatid cohes   | Pds5b;Aprin;As3;Kiaa0 | S1362 | 1           | 7             | AESPETSAVESTQSTPQK   | AES(0.324)PET(0.324)S   | AES(ph)PETSAVESTQS       | CK2                  |                           |                |            | No                     |
| 1176 | IPI00845638 | Sister chromatid cohes   | Pds5b;Aprin;As3;Kiaa0 | T1361 | 1           | 6             | AESPETSAVESTQSTPQK   | AES(0.324)PET(0.324)S   | AES(ph)PETSAVESTQS       | CK1                  |                           |                |            | No                     |
| 1178 | IPI00845638 | Sister chromatid cohes   | Pds5b;Aprin;As3;Kiaa0 | T1370 | 1           | 15            | AESPETSAVESTQSTPQK   | AES(0.088)PET(0.088)S   | AESPETSAVESTQST(ph)      | Polo box             |                           |                |            | No                     |
| 1149 | IPI00845638 | Sister chromatid cohes   | Pds5b;Aprin;As3;Kiaa0 | S1156 | 3           | 5             | METVSNASSSSNPSSPG    | MET(0.439)VS(0.439)N    | MET(ph)VSNAAS(ph)S       | GSK3                 |                           |                |            | No                     |
| 1154 | IPI00845638 | Sister chromatid cohes   | Pds5b;Aprin;As3;Kiaa0 | S1159 | 3           | 8             | METVSNASSSSNPSSPG    | MET(0.439)VS(0.439)N    | MET(ph)VSNAAS(ph)S       | CK1                  |                           |                |            | No                     |
| 1159 | IPI00845638 | Sister chromatid cohes   | Pds5b;Aprin;As3;Kiaa0 | S1160 | 3           | 9             | METVSNASSSSNPSSPG    | MET(0.439)VS(0.439)N    | MET(ph)VSNAAS(ph)S       | CK1                  |                           |                |            | No                     |
| 1164 | IPI00845638 | Sister chromatid cohes   | Pds5b;Aprin;As3;Kiaa0 | S1161 | 3           | 10            | METVSNASSSSNPSSPG    | MET(0.439)VS(0.439)N    | MET(ph)VSNAAS(ph)S       | GSK3                 |                           |                |            | No                     |
| 1166 | IPI00845638 | Sister chromatid cohes   | Pds5b;Aprin;As3;Kiaa0 | S1162 | 3           | 11            | METVSNASSSSNPSSPG    | MET(0.439)VS(0.439)N    | MET(ph)VSNAAS(ph)S       | CK1                  |                           |                |            | No                     |
| 1172 | IPI00845638 | Sister chromatid cohes   | Pds5b;Aprin;As3;Kiaa0 | S1165 | 3           | 14            | METVSNASSSSNPSSPG    | MET(0.439)VS(0.439)N    | MET(ph)VSNAAS(ph)S       | CK1                  |                           |                |            | No                     |
| 1002 | IPI00845638 | Sister chromatid cohes   | Pds5b;Aprin;As3;Kiaa0 | S1166 | 1           | 15            | METVSNASSSSNPSSPG    | METVSNASSSSNPSS(0.0     | M(ox)ETVSNASSSSNP        | WW GroupIV           | 1.1                       | 0.47806        |            | No                     |
| 1181 | IPI00845638 | Sister chromatid cohes   | Pds5b;Aprin;As3;Kiaa0 | T1154 | 3           | 3             | METVSNASSSSNPSSPG    | MET(0.439)VS(0.439)N    | MET(ph)VSNAAS(ph)S       | CAMK2                |                           |                |            | No                     |
| 274  | IPI00121013 | Astrocytic phosphopro    | Pea15;Pea15a;Pea15;P  | S116  | 1           | 7             | DIIRQPSSEEEIHK       | DIIRQPS(1)EEIHK         | DIIRQPS(ph)EEIHK         | PKD                  | 0.9                       | 0.10757        |            | Yes                    |

| No   | IPI Numbers | Protein Names                | Gene Names              | pAA   | Number of P | Position in p | Peptide Sequence    | Phospho (STY) Probabi    | Modified Sequence                    | Best Motif  | Ratio <sup>1</sup> of Phd | Ratio Signif | Up-/Down-r | Localized phosphosite? |
|------|-------------|------------------------------|-------------------------|-------|-------------|---------------|---------------------|--------------------------|--------------------------------------|-------------|---------------------------|--------------|------------|------------------------|
| 109  | IPI0055140  | Phosphoglucosyltransferase-1 | Pgm1;Pgm2;Pgm2;RP2      | S117  | 1           | 10            | AIGGILTASHNPPGGNG   | AIGGILT(0.004)AS(0.9)    | (ca)AIGGILTAS(ph)HN                  | NEK6        | 0.7                       | 0.0021296    | Down       | Yes                    |
| 98   | IPI0055140  | Phosphoglucosyltransferase-1 | Pgm1;Pgm2;Pgm2;RP2      | T115  | 1           | 8             | AIGGILTASHNPPGGNG   | AIGGILT(0.5)AS(0.5)HN    | AIGGILT(ph)ASHNPPGGNGDFGIK           |             | 0.6                       | 0.0012542    | Down       | No                     |
| 762  | IPI00319973 | Membrane-associated          | Pgrmc1;Pgrmc            | S181  | 1           | 9             | EGEPTVYSDDDEPKDET   | EGEPT(0.001)YV(0.02)     | EGEPTVYS(ph)DDEEPCCK2                |             | 1.2                       | 0.37663      | Down       | Yes                    |
| 1092 | IPI00319973 | Membrane-associated          | Pgrmc1;Pgrmc            | T178  | 1           | 6             | EGEPTVYSDDDEPKDET   | EGEPT(0.304)YV(0.30)     | EGEPT(ph)YVSDDEEPLK1                 |             |                           |              |            | No                     |
| 288  | IPI00319973 | Membrane-associated          | Pgrmc1;Pgrmc            | Y180  | 1           | 8             | EGEPTVYSDDDEPKDET   | EGEPT(0.049)YV(0.76)     | EGEPTVY(ph)SDDEEPKDETARK             |             | 1.3                       | 0.11601      | Down       | Yes                    |
| 1127 | IPI00648030 | Phosphatase and actin        | Phactr4;Kiaa4120;Phac   | S126  | 1           | 1             | SSSPVLVEEPEER       | S(0.475)S(0.263)S(0.26)  | S(ph)SSSPVLVEEPEER                   | CK1         |                           |              |            | No                     |
| 785  | IPI00123868 | PHD finger protein 2;G       | Phf2                    | S873  | 1           | 8             | DSDYVYPSLESDENPVF   | DSDYVY(0.003)PS(0.87)    | DSDYVYPS(ph)LESDENPVFK               |             | 1.0                       | 0.38534      | Down       | Yes                    |
| 861  | IPI00123868 | PHD finger protein 2;G       | Phf2                    | S876  | 1           | 11            | DSDYVYPSLESDENPVF   | DSDYVYPS(0.009)LES(0)    | DSDYVYPSLESDENPVFK                   |             | 1.1                       | 0.42124      | Down       | Yes                    |
| 1369 | IPI00377615 | Phf3 protein                 | Phf3                    | S1147 | 1           | 23            | KHSDNEAESLADALSSTT  | KHS(0.043)DNEAES(0.0)    | KHSDNEAESLADALSSTNLT(ph)SDFEEEKQESPK |             |                           |              |            | No                     |
| 895  | IPI00377615 | Phf3 protein                 | Phf3                    | S1157 | 1           | 33            | KHSDNEAESLADALSSTT  | KHS(0.001)DNEAES(0.0)    | KHSDNEAESLADALSSTCDK1                |             | 1.1                       | 0.4356       | Down       | No                     |
| 396  | IPI00377615 | Phf3 protein                 | Phf3                    | S377  | 1           | 12            | NTDIVDKPENSQRNE     | NT(0.001)VDIVDKPENS(0)   | NTDIVDKPENS(ph)PCDK2                 |             | 1.3                       | 0.20365      | Down       | Yes                    |
| 40   | IPI00377615 | Phf3 protein;Phf3 prote      | Phf3;Phf3               | S658  | 1           | 1             | SFSLDEPPLFIPDNIAVK  | S(0.613)FS(0.387)JDEP    | S(ph)FSLDEPPLFIPDNIAVK               | CK1         | 3.5                       | 1.428E-11    | Up         | No                     |
| 1364 | IPI00137302 | PHD finger protein 6;Ph      | Phf6;Kiaa1823;Phf6;Kia  | S154  | 1           | 21            | TAHNSADLEESFNEHEL   | TAHNSADLEES(0.001)       | TAHNSADLEESFNEHEL                    | NEK6        |                           |              |            | No                     |
| 1365 | IPI00137302 | PHD finger protein 6;Ph      | Phf6;Kiaa1823;Phf6;Kia  | S155  | 1           | 22            | TAHNSADLEESFNEHEL   | TAHNSADLEES(0.001)       | TAHNSADLEESFNEHEL                    | WW GroupIV  |                           |              |            | No                     |
| 595  | IPI00311490 | PH-interacting protein;      | Phip;Ndrp;Wdr11         | S1783 | 1           | 9             | TAFYNEDDSEEEQR      | TAFYNEDDS(1)EEEQR        | TAFYNEDDS(ph)EEEQR                   | CK2         | 1.0                       | 0.29651      | Down       | No                     |
| 1180 | IPI00403827 | Pleckstrin homology-lik      | Phldb2;L5b;Phldb2;L5    | S465  | 1           | 3             | RLSAGTTVADVQK       | RLS(0.333)AGT(0.333)T    | RLS(ph)AGTTVADVQK                    | PKA         |                           |              |            | Yes                    |
| 821  | IPI00403827 | Pleckstrin homology-lik      | Phldb2;L5b;Phldb2;L5    | S486  | 1           | 4             | LQLSDEESVFEDALVCPD  | LQLS(1)DEESVFEDALVC      | LQLS(ph)DEESVFEDALV                  | CK2         | 1.0                       | 0.39999      | Down       | Yes                    |
| 893  | IPI00403827 | Pleckstrin homology-lik      | Phldb2;L5b;Phldb2;L5    | S490  | 1           | 8             | LQLSDEESVFEDALVCPD  | LQLS(0.105)DEES(0.89)    | LQLSDEES(ph)VFEDALV                  | PLK         | 1.1                       | 0.4349       | Down       | Yes                    |
| 476  | IPI00403827 | Pleckstrin homology-lik      | Phldb2;L5b;Phldb2;L5    | S510  | 1           | 3             | KGSLQDQVDVAGFNLGH   | KGS(1)LQDQVDVAGFNLGH     | KGS(ph)LQDQVDVAGFNLGH                | PKA         | 1.2                       | 0.24538      | Down       | Yes                    |
| 111  | IPI00403827 | Pleckstrin homology-lik      | Phldb2;L5b;Phldb2;L5    | T468  | 1           | 6             | RLSAGTTVADVQK       | RLS(0.112)AGT(0.777)T    | RLSAGT(ph)TVADVQK                    | CK1         | 1.8                       | 0.0023391    | Up         | Yes                    |
| 1182 | IPI00403827 | Pleckstrin homology-lik      | Phldb2;L5b;Phldb2;L5    | T469  | 1           | 7             | RLSAGTTVADVQK       | RLS(0.333)AGT(0.333)T    | RLS(ph)AGTTVADVQK                    | FHA1 Rad53p |                           |              |            | No                     |
| 369  | IPI00403827 | Pleckstrin homology-lik      | Phldb2;L5b;Phldb2;L5    | S981  | 1           | 8             | AHLPLGQSNCSGSLPH3   | AHLPLGQS(0.561)NS(0)     | AHLPLGQS(ph)NSCSGSLPH3               | NEK6        | 1.3                       | 0.18146      | Down       | No                     |
| 1195 | IPI00403827 | Pleckstrin homology-lik      | Phldb2;L5b;Phldb2;L5    | S983  | 1           | 10            | AHLPLGQSNCSGSLPH3   | AHLPLGQS(0.498)NS(0)     | AHLPLGQS(ph)NSCSGSLPH3LATMTK         |             |                           |              |            | No                     |
| 643  | IPI00403827 | Pleckstrin homology-lik      | Phldb2;L5b;Phldb2;L5    | S986  | 1           | 13            | AHLPLGQSNCSGSLPH3   | AHLPLGQS(0.035)NS(0)     | AHLPLGQSNCSGSLPH3                    | CK1         | 1.0                       | 0.32465      | Down       | Yes                    |
| 954  | IPI00881116 | PHD and RING finger do       | Phrf1;Kiaa1542;Phrf1;K  | S1201 | 1           | 3             | EVSPAPATQGESR       | EVS(1)PAPATQGESR         | EVS(ph)PAPATQGESR                    | CAMK2       | 1.1                       | 0.4576       | Down       | Yes                    |
| 295  | IPI00918347 | Phosphatidylinositol-4-      | Pip5k1c;Kiaa0589;Pip5   | S554  | 1           | 3             | TQSSGQDGRPQEEPAHA   | T(0.167)QDS(0.696)S(0.1) | TQS(ph)SGQDGRPQEEPAHA                | PKA/AKT     | 1.3                       | 0.12314      | Down       | No                     |
| 231  | IPI00884540 | Polycystin-2 delta 7 var     | Pkd2;Pkd2               | S806  | 1           | 1             | SLDSEEDDEDSGHSR     | S(0.558)LDDS(0.441)EE    | S(ph)LDDSSEEDDEDSGHSR                | GSK3        | 0.9                       | 0.075253     | Down       | No                     |
| 435  | IPI00884540 | Polycystin-2 delta 7 var     | Pkd2;Pkd2               | S810  | 1           | 5             | SLDSEEDDEDSGHSR     | LDDS(1)EEEDDEDSGH        | LDDS(ph)EEEDDEDSGHSR                 | CK2         | 1.0                       | 0.22764      | Down       | Yes                    |
| 497  | IPI00474711 | Putative uncharacterize      | Pkn1;Pkn1;Pkn1;Prk1;Pr  | S925  | 1           | 18            | TDVSNDFEFTGEAPTLS   | TDVSNDFEFTGEAPT(0)       | TDVSNDFEFTGEAPTLCCK2                 |             | 1.0                       | 0.25732      | Down       | Yes                    |
| 1066 | IPI00474711 | Putative uncharacterize      | Pkn1;Pkn1;Pkn1;Prk1;Pr  | T781  | 1           | 1             | TSTFCGTFEFLAPEVLTDT | T(0.327)S(0.224)T(0.22)  | T(ph)STFCGTFEFLAPEVLTDTSYTR          |             |                           |              |            | No                     |
| 26   | IPI00312414 | Serine/threonine-prote       | Pkn2;Prkl2;Pkn2;Prkl    | S581  | 1           | 2             | ASSLGETDESSLER      | AS(0.5)S(0.5)JLGETDESS   | AS(ph)SLGETDESSLER                   | PKA         | 6.7                       | 1.05E-25     | Up         | No                     |
| 27   | IPI00312414 | Serine/threonine-prote       | Pkn2;Prkl2;Pkn2;Prkl    | S582  | 1           | 3             | ASSLGETDESSLER      | AS(0.5)S(0.5)JLGETDESS   | AS(ph)SLGETDESSLER                   | CAMK2       | 6.7                       | 1.05E-25     | Up         | No                     |
| 1089 | IPI00312414 | Serine/threonine-prote       | Pkn2;Prkl2;Pkn2;Prkl    | T813  | 1           | 1             | TSTFCGTFEFLAPEVLTET | T(0.306)S(0.231)T(0.23)  | T(ph)STFCGTFEFLAPEVLTETSYTR          |             |                           |              |            | No                     |
| 507  | IPI00312414 | Serine/threonine-prote       | Pkn2;Prkl2;Pkn2;Prkl    | T957  | 1           | 20            | GREDVSNDFEFTSEAPI   | GREDVSNDFEFTS(0.0)       | GREDVSNDFEFTSEAPI                    | CK2         | 1.2                       | 0.26053      | Down       | Yes                    |
| 646  | IPI00111169 | Cytosolic phospholipase      | Pla2g4a;Cpla2;Pla2g4;P  | S437  | 1           | 10            | HIVSNDSDDSDDEAQQ    | HIVSNDSDDSD(1)DDEAQQ     | HIVSNDSDDSD(ph)DDEAQQ                | CK2         | 1.0                       | 0.3258       | Down       | Yes                    |
| 655  | IPI00130046 | Plcd1 protein;1-phosph       | Plcd1;Plcd1;Plcd        | S460  | 1           | 20            | KLGLLPAGGENGPEAT    | KLGLLPAGGENGPEAT         | KLGLLPAGGENGPEATDVS(ph)DEDEAAEMED    |             | 1.0                       | 0.33217      | Down       | Yes                    |
| 1203 | IPI00400215 | Plectin-1;Plectin-6          | Plec1                   | S20   | 1           | 3             | RTSSEDNLYLAVLR      | RT(0.333)S(0.333)S(0.3)  | RT(ph)SSEDNLYLAVLR                   | PKA         |                           |              |            | No                     |
| 204  | IPI00400215 | Plectin-1;Plectin-6          | Plec1                   | S21   | 1           | 3             | TSSSEDNLYLAVLR      | T(0.083)S(0.035)S(0.88)  | TSS(ph)EDNLYLAVLR                    | PKA         | 0.8                       | 0.058354     | Down       | Yes                    |
| 156  | IPI00400215 | Plectin-1;Plectin-6          | Plec1                   | T19   | 1           | 2             | RTSSEDNLYLAVLR      | RT(0.748)S(0.126)S(0.1)  | RT(ph)SSEDNLYLAVLR                   | CK2         | 0.8                       | 0.027906     | Down       | No                     |
| 71   | IPI00400215 | Plectin-1;Plectin-6;Plec     | Plec1;Plec1;Plec1;Plec1 | S4243 | 1           | 1             | SSSVGSSSSYPISAGPR   | S(0.558)S(0.288)S(0.15)  | S(ph)SSSVGSSSSYPISAGPR               | PKA/AKT     | 2.1                       | 6.85E-05     | Up         | No                     |
| 74   | IPI00400215 | Plectin-1;Plectin-6;Plec     | Plec1;Plec1;Plec1;Plec1 | S4245 | 1           | 3             | SSSVGSSSSYPISAGPR   | S(0.103)S(0.06)S(0.837)  | SSS(ph)VGSSSSYPISAGPR                | PKA/AKT     | 2.1                       | 8.494E-05    | Up         | Yes                    |
| 1272 | IPI00400215 | Plectin-1;Plectin-6;Plec     | Plec1;Plec1;Plec1;Plec1 | S4255 | 1           | 13            | SSSVGSSSSYPISAGPR   | S(0.066)S(0.067)S(0.06)  | SSSVGSSSSYPIS(ph)SA                  | CK1         |                           |              |            | No                     |
| 1275 | IPI00400215 | Plectin-1;Plectin-6;Plec     | Plec1;Plec1;Plec1;Plec1 | S4256 | 1           | 14            | SSSVGSSSSYPISAGPR   | S(0.066)S(0.067)S(0.06)  | SSSVGSSSSYPIS(ph)SAGPR               |             |                           |              |            | No                     |
| 138  | IPI00400215 | Plectin-1;Plectin-6;Plec     | Plec1;Plec1;Plec1;Plec1 | S4472 | 1           | 4             | GYYSPYVSGSGTAGSR    | GY(0.004)Y(0.06)S(0.93)  | GYYSPYVSGSGTAGSR                     |             | 0.7                       | 0.013447     | Down       | Yes                    |
| 1253 | IPI00400215 | Plectin-1;Plectin-6;Plec     | Plec1;Plec1;Plec1;Plec1 | S4477 | 1           | 9             | GYYSPYVSGSGTAGSR    | GY(0.055)Y(0.055)S(0.0)  | GYYSPYVSGSGTAGSR                     | GSK3        |                           |              |            | No                     |
| 1257 | IPI00400215 | Plectin-1;Plectin-6;Plec     | Plec1;Plec1;Plec1;Plec1 | S4479 | 1           | 11            | GYYSPYVSGSGTAGSR    | GY(0.055)Y(0.055)S(0.0)  | GYYSPYVSGSGTAGSR                     | CK1         |                           |              |            | No                     |
| 1261 | IPI00400215 | Plectin-1;Plectin-6;Plec     | Plec1;Plec1;Plec1;Plec1 | S4481 | 1           | 13            | GYYSPYVSGSGTAGSR    | GY(0.055)Y(0.055)S(0.0)  | GYYSPYVSGSGTAGSR                     | GSK3        |                           |              |            | No                     |
| 1266 | IPI00400215 | Plectin-1;Plectin-6;Plec     | Plec1;Plec1;Plec1;Plec1 | S4485 | 1           | 17            | GYYSPYVSGSGTAGSR    | GY(0.055)Y(0.055)S(0.0)  | GYYSPYVSGSGTAGSR                     | GSK3        |                           |              |            | No                     |
| 534  | IPI00400215 | Plectin-1;Plectin-6;Plec     | Plec1;Plec1;Plec1;Plec1 | S580  | 1           | 7             | NDESQLSPATR         | NDESQLS(0.995)PAT(0)     | NDESQLS(ph)PATR                      | CK1         | 1.0                       | 0.26961      | Down       | Yes                    |
| 466  | IPI00400215 | Plectin-1;Plectin-6;Plec     | Plec1;Plec1;Plec1;Plec1 | T3889 | 1           | 4             | KQITVEELVLR         | KQIT(1)VEELVLR           | KQIT(ph)VEELVLR                      | PKD         | 1.0                       | 0.24158      | Down       | Yes                    |
| 1281 | IPI00400215 | Plectin-1;Plectin-6;Plec     | Plec1;Plec1;Plec1;Plec1 | T4482 | 1           | 14            | GYYSPYVSGSGTAGSR    | GY(0.055)Y(0.055)S(0.0)  | GYYSPYVSGSGTAGSR                     | CK1         |                           |              |            | No                     |
| 1286 | IPI00400215 | Plectin-1;Plectin-6;Plec     | Plec1;Plec1;Plec1;Plec1 | Y4470 | 1           | 2             | GYYSPYVSGSGTAGSR    | GY(0.312)Y(0.312)S(0.3)  | GY(ph)YVSGSGSGTAGSR                  |             |                           |              |            | No                     |
| 1289 | IPI00400215 | Plectin-1;Plectin-6;Plec     | Plec1;Plec1;Plec1;Plec1 | Y4471 | 1           | 3             | GYYSPYVSGSGTAGSR    | GY(0.312)Y(0.312)S(0.3)  | GY(ph)YVSGSGSGTAGSR                  |             |                           |              |            | No                     |
| 1162 | IPI00403031 | Pleckstrin homology do       | Plekho2;Plekho1         | S394  | 1           | 2             | SSSLGDLRL           | S(0.06)S(0.47)S(0.47)LC  | SS(ph)SLGDLRL                        | PKA         |                           |              |            | No                     |
| 605  | IPI00403031 | Pleckstrin homology do       | Plekho2;Plekho1         | S395  | 1           | 3             | SSSLGDLRL           | S(0.01)S(0.005)S(0.985)  | SSS(ph)SLGDLRL                       | CAMK2       | 1.2                       | 0.3042       | Down       | Yes                    |
| 591  | IPI00229072 | Probable transcription       | Pml;Pml                 | S17   | 1           | 7             | VPAPPGSPCR          | VPAPPGS(1)PCR            | VPAPPGS(ph)PCR                       | ERK/MAPK    | 1.2                       | 0.29534      | Down       | Yes                    |
| 1287 | IPI00229072 | Probable transcription       | Pml;Pml                 | S528  | 1           | 3             | ATSPPHLDGTSNPSTVPE  | AT(0.483)S(0.483)PPHL    | AT(ph)SPPHLDGTSNPSTVPEKK             |             |                           |              |            | No                     |
| 684  | IPI00110298 | DNA polymerase delta         | Pold3;Pold3             | S306  | 1           | 5             | RVDLSDEEAETHEHLK    | RVDLS(1)DEEAETHEHLK      | RVDLS(ph)DEEAETHEHLK                 | CK2         | 1.2                       | 0.34422      | Down       | Yes                    |
| 580  | IPI00944006 | Putative uncharacterize      | Ppan;mCG 67924;Ppan     | S362  | 1           | 7             | ARADGSDAEDPGAPP     | ARADGDS(1)DAEDPGAPP      | ARADGDS(ph)DAEDPGAPP                 | CK2         | 1.2                       | 0.29033      | Down       | Yes                    |
| 103  | IPI00223459 | Lipid phosphate phosph       | Ppap2a;Hpic53;Lpp1;P    | S274  | 1           | 14            | KEEDPHTTLHETASSR    | KEEDPHT(0.005)T(0.01)    | KEEDPHTTLHETAS(ph)SR                 |             | 0.7                       | 0.0016143    | Down       | No                     |
| 1234 | IPI00223459 | Lipid phosphate phosph       | Ppap2a;Hpic53;Lpp1;P    | S275  | 1           | 15            | KEEDPHTTLHETASSR    | KEEDPHT(0.018)T(0.03)    | KEEDPHTTLHETAS(ph)GSK3               |             |                           |              |            | No                     |
| 136  | IPI00223459 | Lipid phosphate phosph       | Ppap2a;Hpic53;Lpp1;P    | T272  | 1           | 12            | KEEDPHTTLHETASSR    | KEEDPHT(0.002)T(0.01)    | KEEDPHTTLHETAS(ph)AS                 | NEK6        | 0.7                       | 0.012605     | Down       | Yes                    |
| 278  | IPI00664998 | Liprin-beta-1;Protein ty     | Ppfbp1;Kiaa1230;Ppfb    | S788  | 1           | 4             | RRPSDENSTPSEVQQW    | RRPS(0.875)DENS(0.05)    | RRPS(ph)DENSTPSEV                    | CHK1/2      | 1.4                       | 0.10922      | Down       | Yes                    |
| 363  | IPI00664998 | Liprin-beta-1;Protein ty     | Ppfbp1;Kiaa1230;Ppfb    | S792  | 1           | 8             | RRPSDENSTPSEVQQW    | RRPS(0.169)DENS(0.56)    | RRPSDENSTPSEV                        | PLK1        | 0.9                       | 0.17826      | Down       | No                     |
| 177  | IPI00664998 | Liprin-beta-1;Protein ty     | Ppfbp1;Kiaa1230;Ppfb    | S992  | 2           | 6             | DFAARSPASITDEDSNV   | DFAARS(0.889)PS(0.17)    | DFAARS(ph)PSAS(ph)I                  | GSK3        | 1.5                       | 0.04098      | Up         | Yes                    |
| 178  | IPI00664998 | Liprin-beta-1;Protein ty     | Ppfbp1;Kiaa1230;Ppfb    | S996  | 2           | 10            | DFAARSPASITDEDSNV   | DFAARS(0.889)PS(0.17)    | DFAARS(ph)PSAS(ph)I                  | CK1         | 1.5                       | 0.04098      | Up         | Yes                    |

| No   | IPI Numbers | Protein Names             | Gene Names             | pAA  | Number of | Position in p | Peptide Sequence    | Phospho (STY) Probabi  | Modified Sequence       | Best Motif       | Ratio <sup>1</sup> of Phd | Ratio Signifid | Up-/Down-r | Localized phosphosite? |
|------|-------------|---------------------------|------------------------|------|-----------|---------------|---------------------|------------------------|-------------------------|------------------|---------------------------|----------------|------------|------------------------|
| 1260 | IPI00664998 | Liprin-beta-1;Protein ty  | Ppfbp1;Kiaa1230;Ppfit  | S593 | 1         | 1             | SQSTTFNPDMDSEPEFK   | S(0.388)QS(0.3)T(0.3)T | _S(ph)QSTTFNPDMDSE      | NIMA             |                           |                | No         |                        |
| 321  | IPI00664998 | Liprin-beta-1;Protein ty  | Ppfbp1;Kiaa1230;Ppfit  | S595 | 1         | 3             | SQSTTFNPDMDSEPEFK   | S(0.114)QS(0.805)T(0.0 | SOS(ph)ITTFNPDMDSE      | PKA/AKT          | 0.9                       | 0.14359        | Yes        |                        |
| 543  | IPI00664998 | Liprin-beta-1;Protein ty  | Ppfbp1;Kiaa1230;Ppfit  | S573 | 1         | 16            | SKGSQGSPPFPMSPSP    | S(0.001)KGS(0.001)QGT  | SKGSQGSPPFPMSPSP        | WW GroupIV       | 1.0                       | 0.27255        | No         |                        |
| 998  | IPI00554989 | Peptidyl-prolyl cis-trans | Ppia                   | T5   | 1         | 12            | MVNPVTFFDITADDEPL   | MVNPT(1)VFDDITADDE     | MVNPT(ph)VFFDITADDEPLGR |                  | 1.1                       | 0.47679        | Yes        |                        |
| 219  | IPI00349306 | Peptidyl-prolyl cis-trans | Ppig;Ppig;RP23-174C9   | S395 | 1         | 5             | SELNEIKENQRSPVLR    | SELNEIKENQR(1)PVR      | _SELNEIKENQR(ph)PV      | CDK2             | 1.4                       | 0.066505       | Yes        |                        |
| 957  | IPI00110280 | Peptidyl-prolyl cis-trans | Ppil4                  | S178 | 1         | 23            | INHVTLLDDPDDPDDLLI  | INHVTLLDDPDDPDDLLI     | INHVTLLDDPDDPDDLLIPDRS  | (ph)PEPTKEQLDS   | 1.1                       | 0.45832        | Yes        |                        |
| 1346 | IPI00110280 | Peptidyl-prolyl cis-trans | Ppil4                  | S188 | 1         | 33            | INHVTLLDDPDDPDDLLI  | INHVT(0.075)VLLDDPDD   | INHVTLLDDPDDPDDLLIPDRS  | (ph)PEPTKEQLDSGR |                           |                | No         |                        |
| 566  | IPI00110280 | Peptidyl-prolyl cis-trans | Ppil4                  | T159 | 1         | 4             | INHVTLLDDPDDPDDLLI  | INHVT(0.709)VLLDDPDD   | INHVT(ph)VLLDDPDDPDD    | FHA2 Rad53p      | 1.2                       | 0.28453        | No         |                        |
| 1349 | IPI00110280 | Peptidyl-prolyl cis-trans | Ppil4                  | T182 | 1         | 27            | INHVTLLDDPDDPDDLLI  | INHVT(0.02)VLLDDPDD    | INHVTLLDDPDDPDDLLIPDRS  | (ph)PEPTK        |                           |                | No         |                        |
| 757  | IPI00671847 | Ppp1r12a protein;MCG      | Ppp1r12a;mCG_12239     | S445 | 1         | 4             | KTGSYGALAEISASK     | KT(0.004)GS(0.993)Y(0  | KTGS(ph)YGALAEISASK     | PKD              | 1.2                       | 0.37466        | Yes        |                        |
| 23   | IPI00671847 | Ppp1r12a protein;MCG      | Ppp1r12a;mCG_12239     | S507 | 1         | 3             | LASTSDIEEK          | LAS(0.998)T(0.002)SDI  | LAS(ph)TSDIEEK          | CAMK2            | 8.6                       | 9.464E-33      | Up         |                        |
| 1083 | IPI00671847 | Ppp1r12a protein;MCG      | Ppp1r12a;mCG_12239     | S509 | 1         | 5             | LASTSDIEEK          | LAS(0.333)T(0.333)S(0  | LAS(ph)TSDIEEK          | CK2              |                           |                | No         |                        |
| 121  | IPI00671847 | Ppp1r12a protein;MCG      | Ppp1r12a;mCG_12239     | S870 | 1         | 20            | STGVSFWTQDSDENEC    | STGVSFWTQDSDENEC       | STGVSFWTQDSDENEC        | PKA              | 1.7                       | 0.0050341      | Up         |                        |
| 606  | IPI00671847 | Ppp1r12a protein;MCG      | Ppp1r12a;mCG_12239     | T443 | 1         | 1             | TGSYGALAEISASK      | T(0.628)GS(0.346)Y(0.0 | T(ph)TGSYGALAEISASK     | NIMA             | 1.2                       | 0.305          | No         |                        |
| 1088 | IPI00671847 | Ppp1r12a protein;MCG      | Ppp1r12a;mCG_12239     | T508 | 1         | 4             | LASTSDIEEK          | LAS(0.333)T(0.333)S(0  | LAS(ph)TSDIEEK          | NEK6             |                           |                | No         |                        |
| 75   | IPI00671847 | Ppp1r12a protein;MCG      | Ppp1r12a;mCG_12239     | S693 | 1         | 2             | RSTQGVTLTDLQEA      | RS(0.838)T(0.161)QGV   | RST(ph)QGVTLTDLQEA      | PKA              | 0.6                       | 0.000121       | Down       |                        |
| 76   | IPI00671847 | Ppp1r12a protein;MCG      | Ppp1r12a;mCG_12239     | T694 | 1         | 3             | RSTQGVTLTDLQEA      | RS(0.003)T(0.997)QGV   | RST(ph)QGVTLTDLQEA      | PKA              | 0.6                       | 0.0001523      | Down       |                        |
| 145  | IPI00380331 | Protein phosphatase 2     | Pp2r5d;mCG_2696        | S566 | 1         | 3             | RKSELQPDVYTIK       | RKS(1)ELQPDVYTIK       | RKS(ph)ELQPDVYTIK       | _CHK1/2          | 0.8                       | 0.016576       | Down       |                        |
| 1352 | IPI00230005 | cAMP-dependent prote      | Prkaca;Pkaca;Prkaca;P  | S213 | 1         | 18            | TWTLGCTPEYLAPEILSK  | T(0.269)WT(0.252)LCG   | TWTLGCTPEYLAPEILSK      | (ph)K            |                           |                | No         |                        |
| 438  | IPI00230005 | cAMP-dependent prote      | Prkaca;Pkaca;Prkaca;P  | T196 | 1         | 1             | TWTLGCTPEYLAPEILSK  | T(0.811)WT(0.162)LCG   | T(ph)WTLGCTPEYLAPEI     | FHA2 Rad53p      | 1.0                       | 0.22839        | Yes        |                        |
| 530  | IPI00119575 | Putative uncharacteriz    | Prkar1a;Prkar1a;Prkar1 | S212 | 1         | 9             | TDSREDEISPPPPNPVK   | TDSREDEIS(1)PPPPNPV    | TDSREDEIS(ph)PPPPNPVK   |                  | 1.0                       | 0.2675         | Yes        |                        |
| 1046 | IPI00169788 | Protein kinase, cAMP d    | Prkar2a;mCG_16488;P    | S97  | 1         | 3             | RVSVCAETFPNDEEEDN   | RVS(0.996)VCAET(0.00   | RVS(ph)VCAETFPNDEE      | AURORA-A         | 1.1                       | 0.49507        | Yes        |                        |
| 780  | IPI00169788 | Protein kinase, cAMP d    | Prkar2a;mCG_16488;P    | T102 | 1         | 8             | RVSVCAETFPNDEEEDN   | RVS(0.5)VCAET(0.5)FN   | RVS(ph)VCAETFPNDEE      | NDPR             | 1.1                       | 0.38444        | No         |                        |
| 847  | IPI00224570 | cAMP-dependent prote      | Prkar2b                | S112 | 1         | 3             | RASVCAEAYNPDEEEDD   | RAS(1)VCAEAYNPDEE      | RAS(ph)VCAEAYNPDE       | AURORA-A         | 1.0                       | 0.41271        | Yes        |                        |
| 180  | IPI00321446 | Protein kinase C alpha    | Prkca;Pkca;Prkca;RP23  | T497 | 1         | 1             | TFCGTDPYIAPEIAYQPY  | T(0.957)FCGT(0.042)P   | T(ph)FCGTDPYIAPEIAYQ    | PGK              | 0.8                       | 0.041901       | Down       |                        |
| 1262 | IPI00227880 | Protein kinase C delta    | Prkcd;Pkcd;Prkcd;Pkcd  | S530 | 1         | 2             | ASTFCGTPDYIAPEILQGL | AS(0.5)T(0.5)FCGTPDYI  | AS(ph)TFCGTPDYIAPEI     | PKA              |                           |                | No         |                        |
| 1267 | IPI00227880 | Protein kinase C delta    | Prkcd;Pkcd;Prkcd;Pkcd  | T531 | 1         | 3             | ASTFCGTPDYIAPEILQGL | AS(0.5)T(0.5)FCGTPDYI  | AS(ph)TFCGTPDYIAPEI     | CAMK2            |                           |                | No         |                        |
| 1273 | IPI00227880 | Protein kinase C delta    | Prkcd;Pkcd;Prkcd;Pkcd  | T535 | 1         | 7             | ASTFCGTPDYIAPEILQGL | AS(0.328)T(0.328)FCGT  | AS(ph)TFCGTPDYIAPEI     | LQGLK            |                           |                | No         |                        |
| 807  | IPI00122084 | Serine/threonine-prote    | Prkd1;Pkcmm;Pkd;Prkcm  | S748 | 1         | 1             | SVVGTTPAYLAPEVLR    | S(1)VVGTTPAYLAPEVLR    | S(ph)VVGTTPAYLAPEVLR    | NIMA             | 1.1                       | 0.39484        | Yes        |                        |
| 1258 | IPI00480507 | Pre-mRNA-processing f     | Prpf19;Prpf19;Snev;Prp | S2   | 1         | 1             | SLICSISNEVPEHPCVSPV | S(0.373)LICS(0.313)S(0 | S(ph)LICSISNEVPEHPC     | GSK3             |                           |                | No         |                        |
| 1249 | IPI00896672 | PRP4 pre-mRNA proces      | Prpf4b;mCG_22253;Pr    | S852 | 1         | 21            | LCDFGSASHVADNDITP   | LCDFGSASHVADNDIT(0     | LCDFGSASHVADNDITP       | (ph)LVSR         |                           |                | No         |                        |
| 410  | IPI00896672 | PRP4 pre-mRNA proces      | Prpf4b;mCG_22253;Pr    | S94  | 1         | 12            | EVIEASDKLEGLSPAK    | EVIEAS(0.004)DKLEGLS   | EVIEASDKLEGLS(ph)PA     | CDK2             | 1.3                       | 0.2119         | Yes        |                        |
| 726  | IPI00896672 | PRP4 pre-mRNA proces      | Prpf4b;mCG_22253;Pr    | Y849 | 1         | 18            | LCDFGSASHVADNDITP   | LCDFGSAS(0.001)HVAD    | LCDFGSASHVADNDITP       | (ph)LVSR         | 1.2                       | 0.35996        | Yes        |                        |
| 398  | IPI00153950 | Phosphoribosyl pyroph     | Prpsap2                | S227 | 1         | 23            | LGVAVIHGEAQDAESDL   | LGVAVIHGEAQDAESDL      | LGVAVIHGEAQDAESDL       | PKA              | 0.9                       | 0.20478        | Yes        |                        |
| 909  | IPI00118248 | Paired mesoderm hom       | Prrx1;Pmx;Pmx1;Prrx1   | S21  | 1         | 3             | LDSPGNLDTLOAK       | LDS(1)PGNLDTLOAK       | LDS(ph)PGNLDTLOAK       | CAMK2            | 1.1                       | 0.44362        | Yes        |                        |
| 919  | IPI00115257 | PC4 and SFRS1-interact    | Psp1;Ledgf;Psp1;Ledg   | S106 | 1         | 6             | QSNASSDVEVEEK       | QSNAS(0.08)S(0.92)VD   | QSNASS(ph)DVEVEEK       | CK2              | 1.1                       | 0.4467         | Yes        |                        |
| 270  | IPI00115257 | PC4 and SFRS1-interact    | Psp1;Ledgf;Psp1;Ledg   | S129 | 1         | 16            | ETNVSKEDTDQEEKASNI  | ETNVSKEDTDQEEKAS(0     | ETNVSKEDTDQEEKAS        | (ph)NEDVTK       | 1.4                       | 0.10628        | Yes        |                        |
| 272  | IPI00115257 | PC4 and SFRS1-interact    | Psp1;Ledgf;Psp1;Ledg   | T122 | 1         | 9             | ETNVSKEDTDQEEKASNI  | ET(0.003)NV(0.046)KE   | ETNVSKEDT(ph)DQEE       | PKD              | 1.4                       | 0.10718        | Yes        |                        |
| 825  | IPI00331644 | Proteasome subunit al     | Psm3                   | S250 | 1         | 9             | ESLKEEDESDDDDNM     | ESLKEEDES(1)DDDDNM     | ESLKEEDES(ph)DDDDNM     |                  | 1.1                       | 0.40247        | Yes        |                        |
| 849  | IPI00127989 | Prostaglandin E synth     | Ptges3;Sid3177;Tebp    | S113 | 1         | 6             | DWEDDSDSDMSNFDR     | DWEDDS(1)DDMSNFDR      | DWEDDSDSDMSNFDR         | (ox)SNFDR        | 1.1                       | 0.41335        | Yes        |                        |
| 1219 | IPI00387213 | Protein tyrosine phosph   | Ptpn12;mCG_6416        | S326 | 1         | 18            | IADGNEITGTMVSSIDS   | IADGNEITGTMV(0.00      | IADGNEITGTMVSSID        | CK1              |                           |                | No         |                        |
| 1223 | IPI00387213 | Protein tyrosine phosph   | Ptpn12;mCG_6416        | S331 | 1         | 23            | IADGNEITGTMVSSIDS   | IADGNEITGTMV(0.00      | IADGNEITGTMVSSIDS       | (ph)EKQDSSPPKPPR |                           |                | No         |                        |
| 727  | IPI00387213 | Protein tyrosine phosph   | Ptpn12;mCG_6416;Ptp    | S588 | 1         | 24            | TVSSTPNSTAEAAHDLT   | TVSSTPNSTAEAAHDLT      | TVSSTPNSTAEAAHDLT       | Polo box         | 1.0                       | 0.36007        | Yes        |                        |
| 3    | IPI00459843 | Putative uncharacteriz    | Ptpn2                  | S89  | 1         | 2             | LSRTDNMNFNNNNK      | LS(0.975)RT(0.025)DNN  | LS(ph)RTDNMNFNNNNK      |                  | 104.9                     | 2.42E-152      | Up         |                        |
| 659  | IPI00117689 | Polymerase I and trans    | Ptrf                   | S169 | 1         | 15            | VMIYQDEVKLPKAKLSVSK | VMIYQDEVKLPKAKLS(0.9   | VMIYQDEVKLPKAKLS        | (ph)AURORA       | 1.2                       | 0.33369        | Yes        |                        |
| 1321 | IPI00117689 | Polymerase I and trans    | Ptrf                   | S171 | 1         | 17            | VMIYQDEVKLPKAKLSVSK | VMIY(0.014)QDEVKLP     | VMIYQDEVKLPKAKLS        | (ph)NEK6         |                           |                | No         |                        |
| 182  | IPI00117689 | Polymerase I and trans    | Ptrf                   | S302 | 1         | 1             | SFTPDHVVYAR         | S(0.999)FT(0.001)PDHV  | S(ph)FTPDHVVYAR         | NIMA             | 0.8                       | 0.042843       | Down       |                        |
| 188  | IPI00117689 | Polymerase I and trans    | Ptrf;Ptrf;Ptrf         | S38  | 1         | 6             | AATEEPSGTGSDLEIKSQ  | AT(0.035)EEPS(0.833)G  | AATEEPS(ph)GTGSDLEI     | GSK3             | 0.8                       | 0.046839       | Down       |                        |
| 610  | IPI00117689 | Polymerase I and trans    | Ptrf;Ptrf;Ptrf         | S42  | 1         | 10            | AATEEPSGTGSDLEIK    | AATEEPS(0.001)GT(0.068 | AATEEPSGTG(ph)DELH      | CK1              | 1.0                       | 0.30562        | Yes        |                        |
| 1332 | IPI00117689 | Polymerase I and trans    | Ptrf;Ptrf;Ptrf         | T34  | 1         | 2             | AATEEPSGTGSDLEIK    | AT(0.376)EEPS(0.196)G  | AT(ph)EEPSGTGSDLEI      | PKA              |                           |                | No         |                        |
| 537  | IPI00117689 | Polymerase I and trans    | Ptrf;Ptrf;Ptrf         | T40  | 2         | 8             | AATEEPSGTGSDLEIK    | AATEEPS(0.989)GT(0.909 | AATEEPS(ph)GT(ph)GSD    | FHA1 Rad53p      | 1.0                       | 0.27067        | Yes        |                        |
| 550  | IPI00330262 | Pumilio homolog 1;Pun     | Pum1;Kiaa0099;Pum1     | T712 | 1         | 5             | RDSLTTGSSDLYKR      | RDS(0.075)LT(0.867)GS  | RDSLTT(ph)GSSDLYKR      | FHA KAPP         | 1.2                       | 0.27782        | Yes        |                        |
| 886  | IPI00112203 | Pumilio homolog 2;Put     | Pum2;Kiaa0235;Pum2     | S136 | 1         | 4             | GKASPFEEQDNR        | GKAS(1)PFEEQDNR        | GKAS(ph)PFEEQDNR        | CK2              | 1.1                       | 0.43146        | Yes        |                        |
| 989  | IPI00128867 | Transcriptional activat   | Purb                   | S316 | 1         | 11            | RGGSGGGGDESEGEV     | RGGSGGGGDES(1)EGEE     | RGGSGGGGDES(ph)EG       | CK2              | 1.1                       | 0.47112        | Yes        |                        |
| 91   | IPI00165881 | Paxillin;Paxillin         | Pxn;Pxn                | S119 | 1         | 9             | AGEEEHVYSPFNK       | AGEEEHVY(0.148)S(0.8   | AGEEEHVYS(ph)PFNK       |                  | 1.0                       | 0.0006659      | Down       |                        |
| 567  | IPI00165881 | Paxillin;Paxillin         | Pxn;Pxn                | Y118 | 1         | 8             | AGEEEHVYSPFNK       | AGEEEHVY(0.991)S(0.0   | AGEEEHVY(ph)SPFNK       | ABL              | 0.6                       | 0.28496        | Yes        |                        |
| 257  | IPI00480432 | MKIAA0857 protein;Ra      | Rab11fp5;mKIAA0857     | S307 | 1         | 3             | TYSDEASQLR          | T(0.003)Y(0.001)S(0.99 | TYS(ph)DEASQLR          | PKA              | 1.4                       | 0.099161       | Yes        |                        |
| 55   | IPI00108335 | DNA repair protein RAC    | Rad50;Rad50;Rad50      | S557 | 3         | 1             | SRHSDELTSLLGYFPNKK  | S(0.612)RHS(0.39)DELT  | (ca)S(ph)RHSDELTT       | PKD              | 0.5                       | 1.21E-06       | Down       |                        |
| 56   | IPI00108335 | DNA repair protein RAC    | Rad50;Rad50;Rad50      | S565 | 3         | 9             | SRHSDELTSLLGYFPNKK  | S(0.612)RHS(0.39)DELT  | (ca)S(ph)RHSDELTT       | S(ph)LLGYFPNKK   | 0.5                       | 1.21E-06       | Down       |                        |
| 1163 | IPI00135190 | Ran-binding protein 3     | Ranbp3                 | S28  | 2         | 1             | SAGSSSPEAGEDSDHED   | S(0.269)AGS(0.249)S(0  | S(ph)AGSSSPEAGEDS       | GSK3             |                           |                | No         |                        |
| 489  | IPI00135190 | Ran-binding protein 3     | Ranbp3                 | S33  | 2         | 6             | SAGSSSPEAGEDSDHED   | S(0.006)AGS(0.026)S(0  | SAGSSS(ph)PEAGEDS       | Polo box         | 1.2                       | 0.25132        | Yes        |                        |
| 1028 | IPI00135190 | Ran-binding protein 3     | Ranbp3                 | S40  | 1         | 13            | SAGSSSPEAGEDSDHED   | SAGSSSPEAGEDS(1)DH     | SAGSSSPEAGEDS(ph)C      | CK2              | 1.1                       | 0.48795        | Yes        |                        |
| 80   | IPI00135190 | Ran-binding protein 3     | Ranbp3                 | S58  | 1         | 3             | TSSLTHSSEK          | T(0.001)S(0.055)S(0.94 | TSS(ph)LTHSSEK          | PKA/AKT          | 2.5                       | 6.14E-07       | Up         |                        |
| 55   | IPI00719915 | Ribonucleoprotein PTB     | Raver1;Kiaa1978        | S576 | 1         | 3             | LLSPIASNR           | LLS(1)PIASNR           | LLS(ph)PIASNR           | CAMK2            | 1.9                       | 0.0004552      | Up         |                        |
| 493  | IPI00719915 | Ribonucleoprotein PTB     | Raver1;Kiaa1978        | S626 | 1         | 4             | HKMSPPPSFNEPR       | HKMS(0.974)PPPS(0.02   | HKMS(ph)PPPSFNEPR       | GSK3             | 1.0                       | 0.25422        | Yes        |                        |
| 551  | IPI00113372 | RB1-inducible coiled-c    | Rb1cc1;Cc1;Kiaa0203;R  | S237 | 1         | 1             | STELVLSPPDMPR       | S(0.663)T(0.337)ELVLS  | S(ph)TELVLSPPDMPR       | NIMA             | 1.2                       | 0.27802        | No         |                        |

| No   | IPI Numbers | Protein Names                    | Gene Names                    | pAA   | Number of P | Position in p | Peptide Sequence    | Phospho (STY) Probabi  | Modified Sequence                  | Best Motif  | Ratio <sup>1</sup> of Phd | Ratio Signifid | Up-/Down-r | Localized phosphosite? |
|------|-------------|----------------------------------|-------------------------------|-------|-------------|---------------|---------------------|------------------------|------------------------------------|-------------|---------------------------|----------------|------------|------------------------|
| 638  | IPI00468834 | RNA-binding protein 10           | Rbm10;Kiaa0122;Rbm10          | S646  | 1           | 8             | LASDDRRSPRR         | LASDDRRS(1)PPR         | _LASDDRRS(ph)PPR                   | CDK2        | 1.2                       | 0.32212        |            | Yes                    |
| 718  | IPI00340815 | Rbm15 protein                    | Rbm15                         | S293  | 1           | 3             | SLSPGGAALGVR        | S(0.096)LS(0.904)PGGA  | SLS(ph)PGGAALGVR                   | CAMK2       | 1.2                       | 0.35824        |            | Yes                    |
| 386  | IPI00170394 | Splicing factor 45;45 kD         | Rbm17;Spf45                   | S155  | 1           | 6             | RPDPDSDEDEDYER      | RPDPDS(1)DEDEDYER      | RPDPDS(ph)DEDEDYER                 |             | 1.3                       | 0.19537        |            | Yes                    |
| 905  | IPI00421119 | RNA-binding protein 25           | Rbm25;Rbm25                   | S675  | 1           | 5             | LGASNSPGQPNSVK      | LGASNS(1)PGQPNSVK      | LGASNS(ph)PGQPNSVK                 |             | 1.1                       | 0.44242        |            | Yes                    |
| 1038 | IPI00828361 | RNA-binding protein 26           | Rbm26;Rbm26;Rbm26             | S127  | 1           | 6             | RLNHSPQQSSSR        | RLNHS(0.972)PPQS(0.0   | RLNHS(ph)PPQSSSR                   | NEK6        | 1.1                       | 0.491          |            | Yes                    |
| 665  | IPI00759858 | RNA-binding protein 33           | Rbm33;Prr8;Rbm33;Prr8         | S243  | 1           | 6             | DIKEESEDEDDDEESGR   | DIKEES(1)DEDDDEES      | DIKEES(ph)DEDDDEES                 | CK2         | 1.2                       | 0.33633        |            | Yes                    |
| 712  | IPI00759858 | RNA-binding protein 33           | Rbm33;Prr8;Rbm33;Prr8         | S41   | 1           | 8             | AAEEDWDSLEDDLLGE    | AAEEDWDS(1)ELEDLL      | AAEEDWDS(ph)ELEDLL                 | CK2         | 1.0                       | 0.35682        |            | Yes                    |
| 920  | IPI00223371 | RNA-binding protein 39           | Rbm39;Caper;Rnpc2;Rnpc2       | S97   | 1           | 3             | YRSPYSGPK           | Y(0.004)RS(0.957)PY(0  | YRS(ph)PYSGPK                      | PKA/AKT     | 1.1                       | 0.44705        |            | Yes                    |
| 598  | IPI00223371 | RNA-binding protein 39           | Rbm39;Caper;Rnpc2;Rnpc2       | S136  | 1           | 3             | DKSPVREPIDLNLTPEER  | DKS(1)PVREPIDLNLTPEE   | DKS(ph)PVREPIDLNLTPE               | CDK2        | 1.2                       | 0.30016        |            | Yes                    |
| 608  | IPI00130160 | RNA-binding protein 5            | Rbm5;Luca15;Rbm5;Luca15       | S59   | 1           | 4             | DYDSEPERER          | DYDS(1)PERER           | DYDS(ph)PERER                      | CDK2        | 1.2                       | 0.30512        |            | Yes                    |
| 715  | IPI00130160 | RNA-binding protein 5            | Rbm5;Luca15;Rbm5;Luca15       | S78   | 1           | 11            | NSDRSEDGYHSDGDEYGR  | NS(0.001)DRS(0.004)EG  | NSDRSEDGYHSDGDEYGR                 |             | 1.0                       | 0.35761        |            | Yes                    |
| 672  | IPI00410937 | RNA-binding protein 8            | Rbm8a;Rbm8;Rbm8a;Rbm8a        | S56   | 1           | 7             | MREDYDSEVQGDGDEPG   | MREDYDS(1)VEQGDGE      | M(ox)REDYDS(ph)VEQGDGDEPGPQR       |             | 1.2                       | 0.34098        |            | Yes                    |
| 179  | IPI00663587 | Putative uncharacterized protein | Rbmxrt;Rbmx;Hnrnpq;Rbmxrt     | S165  | 1           | 5             | RSTPSGPVR           | RSTPS(1)GPVR           | _RSTPS(ph)GPVR                     | CK1         | 1.5                       | 0.041863       | Up         | Yes                    |
| 280  | IPI00663587 | Putative uncharacterized protein | Rbmxrt;Rbmx;Hnrnpq;Rbmxrt     | T163  | 1           | 3             | RSTPSGPVR           | RS(0.008)T(0.984)PS(0  | RST(ph)PSGPVR                      | Polo box    | 1.3                       | 0.11197        |            | Yes                    |
| 1052 | IPI00663587 | Putative uncharacterized protein | Rbmxrt;Rbmx;RP23-37           | S205  | 1           | 5             | DVYLSR              | DVYLS(1)PR             | DVYLS(ph)PR                        | CDK1        | 1.1                       | 0.49953        |            | Yes                    |
| 1    | IPI00349293 | Ring finger and CCHC-t           | Rc3h2;Mnab;Rc3h2;Rc3h2        | S895  | 2           | 9             | EEDPIIPFSDGPIISKWGA | EEDPIIPFS(0.999)DGPII  | (ca)EEDPIIPFS(ph)DGPIISKWGAIS(ph)R |             | 0.001                     | 0              | Down       | Yes                    |
| 2    | IPI00349293 | Ring finger and CCHC-t           | Rc3h2;Mnab;Rc3h2;Rc3h2        | S907  | 2           | 21            | EEDPIIPFSDGPIISKWGA | EEDPIIPFS(0.999)DGPII  | (ca)EEDPIIPFS(ph)DGPIISKWGAIS(ph)R |             | 0.003                     | 2.75E-271      | Down       | Yes                    |
| 345  | IPI00123762 | Putative uncharacterized protein | Rcc1;Rcc1;Chc1;Rcc1;W         | S11   | 1           | 3             | RRSPEDAIPK          | RRS(1)PPEDAIPK         | RRS(ph)PPEDAIPK                    | PKD         | 1.3                       | 0.16541        |            | Yes                    |
| 593  | IPI00395067 | Negative elongation fact         | Rdbp;D17h6s45;Nelfe           | S115  | 1           | 3             | SMSAEDLQEPSR        | S(0.004)MS(0.996)ADE   | SM(ox)S(ph)ADEDLQEPSR              | CAMK2       | 1.2                       | 0.29562        |            | Yes                    |
| 250  | IPI00119795 | RalBP1-associated eps            | Reps1;Reps1                   | S708  | 1           | 3             | LKSEDELRPDVEHTQK    | LKS(0.998)EDELRPDVEH   | LKS(ph)EDELRPDVEHTQK               | PKA/AKT     | 1.4                       | 0.094161       |            | Yes                    |
| 499  | IPI00120529 | Putative uncharacterized protein | Rfc1;Recc1                    | S68   | 2           | 5             | IINDSDSESEETVQVK    | IINDS(0.958)DS(0.958)E | IINDS(ph)DS(ph)ESEETVQVK           | CK2         | 1.2                       | 0.25794        |            | Yes                    |
| 500  | IPI00120529 | Putative uncharacterized protein | Rfc1;Recc1                    | S70   | 2           | 7             | IINDSDSESEETVQVK    | IINDS(0.958)DS(0.958)E | IINDS(ph)DS(ph)ESEETVQVK           | CK2         | 1.2                       | 0.25794        |            | Yes                    |
| 12   | IPI00309304 | Regulator of G-protein           | Rgs2                          | S19   | 1           | 1             | SAGNGPKVEEK         | S(1)AGNGPKVEEK         | (ca)S(ph)AGNGPKVEEK                |             | 12.1                      | 5.602E-44      | Up         | Yes                    |
| 1175 | IPI00122131 | Ras and Rab interactor           | Rin1                          | S338  | 1           | 1             | SMSSAFCSLLAPER      | S(0.374)MS(0.309)S(0.3 | S(ph)MSSAFCSLLAPER                 | NEK6        |                           |                |            | No                     |
| 181  | IPI00122131 | Ras and Rab interactor           | Rin1                          | S341  | 1           | 4             | SMSSAFCSLLAPER      | S(0.118)MS(0.079)S(0.8 | SMSS(ph)AFCSLLAPER                 | CK1         | 0.8                       | 0.042036       | Down       | Yes                    |
| 217  | IPI00122131 | Ras and Rab interactor           | Rin1                          | S345  | 1           | 8             | SMSSAFCSLLAPER      | S(0.098)MS(0.092)S(0.0 | SMSSAFCS(ph)LLAPER                 | CK1         | 0.8                       | 0.06532        |            | No                     |
| 675  | IPI00453849 | mRNA cap guanine-N7              | Rnmt;Kiaa0398;Rnmt;Kiaa0398   | S15   | 1           | 9             | ASVASDPEPPGNEPA     | ASVASDPE(1)PPGNE       | ASVASDPE(ph)PPGNE                  | ERK/MAPK    | 1.0                       | 0.34126        |            | Yes                    |
| 1198 | IPI00403755 | Likely ortholog of H. sa         | RP23-102G9.3;RP23-102G9.3     | Y313  | 1           | 11            | MDLLTIVTQTHYK       | MDLLT(0.001)T(0.001)N  | MDLLTIVTQ(ph)HYK                   | ALK         |                           |                |            | No                     |
| 529  | IPI00869441 | Uncharacterized protein          | RP23-263M10.5;12000           | S25   | 1           | 13            | AEAPAGPALGLPSPVEVES | AEAPAGPALGLPS(1)PEV    | AEAPAGPALGLPS(ph)PEVESGLER         |             | 1.2                       | 0.26748        |            | Yes                    |
| 741  | IPI00869441 | Uncharacterized protein          | RP23-263M10.5;12000           | S30   | 1           | 18            | AEAPAGPALGLPSPVEVES | AEAPAGPALGLPS(0.5)P    | AEAPAGPALGLPS(ph)PEV               | CK2         | 1.0                       | 0.36863        |            | No                     |
| 830  | IPI00111412 | 60S ribosomal protein            | Rpl4                          | S295  | 1           | 4             | ILKSPPIQR           | ILKS(1)PIEIQ           | (ca)ILKS(ph)PIEIQ                  |             | 1.1                       | 0.40568        |            | Yes                    |
| 802  | IPI00314950 | 60S acidic ribosomal pr          | Rplp0;Arbp                    | S304  | 2           | 7             | AEAKEESEDEDMGFG     | AEAKEES(1)EES(1)DEDN   | AEAKEES(ph)EES(ph)DEDM(ox)GFGFLD   |             | 1.0                       | 0.39277        |            | Yes                    |
| 803  | IPI00314950 | 60S acidic ribosomal pr          | Rplp0;Arbp                    | S307  | 2           | 10            | AEAKEESEDEDMGFG     | AEAKEES(1)EES(1)DEDN   | AEAKEES(ph)EES(ph)DEDM(ox)GFGFLD   |             | 1.0                       | 0.39277        |            | Yes                    |
| 875  | IPI00113377 | 60S acidic ribosomal pr          | Rplp1                         | S101  | 2           | 4             | KEESESEDDMGFGFLD    | KEES(1)EES(1)EDDMGF    | KEES(ph)EES(ph)EDDMGFGFLD          |             | 1.1                       | 0.4273         |            | Yes                    |
| 876  | IPI00113377 | 60S acidic ribosomal pr          | Rplp1                         | S104  | 2           | 7             | KEESESEDDMGFGFLD    | KEES(1)EES(1)EDDMGF    | KEES(ph)EES(ph)EDDM(ox)GFGFLD      |             | 1.1                       | 0.4273         |            | Yes                    |
| 1034 | IPI00139795 | 60S acidic ribosomal pr          | Rplp2                         | S102  | 2           | 4             | KEESESEDDMGFGFLD    | KEES(1)EES(1)DDDMGF    | KEES(ph)EES(ph)DDDM(ox)GFGFLD      |             | 1.1                       | 0.48957        |            | Yes                    |
| 1035 | IPI00139795 | 60S acidic ribosomal pr          | Rplp2                         | S105  | 2           | 7             | KEESESEDDMGFGFLD    | KEES(1)EES(1)DDDMGF    | KEES(ph)EES(ph)DDDM(ox)GFGFLD      |             | 1.1                       | 0.48957        |            | Yes                    |
| 711  | IPI00750262 | Regulation of nuclear p          | Rprd1b;Crept;Rprd1b;Crept     | S165  | 1           | 18            | TFQIQEEEDDDYPGSYS   | TFQIQEEEDDDY(0.001)P   | TFQIQEEEDDDYPGSYS(ph)PQDPSAGPLLTEL |             | 1.2                       | 0.35661        |            | Yes                    |
| 559  | IPI00454123 | Regulation of nuclear p          | Rprd2;Kiaa0460;Rprd2;Kiaa0460 | S392  | 1           | 8             | DVEDMELSDVEDDGSK    | DVEDMELS(1)DVEDDG      | DVEDMELS(ph)DVEDDG                 | CK2         | 1.2                       | 0.28031        |            | Yes                    |
| 969  | IPI00173160 | 40S ribosomal protein            | Rps27                         | S11   | 1           | 6             | DLLHPSPEEKKR        | DLLHS(1)PEEKKR         | DLLHS(ph)PEEKKR                    | CK2         | 1.1                       | 0.46315        |            | Yes                    |
| 798  | IPI00134599 | 40S ribosomal protein            | Rps3                          | S224  | 1           | 10            | DEILPTPISEQK        | DEILPT(0.069)T(0.197)E | DEILPTPISEQK                       | CK1         | 1.1                       | 0.39151        |            | No                     |
| 881  | IPI00134599 | 40S ribosomal protein            | Rps3                          | T220  | 1           | 6             | DEILPTPISEQK        | DEILPT(0.5)T(0.5)PISEQ | DEILPT(ph)PISEQK                   | FHA2 Rad53p | 1.1                       | 0.42939        |            | No                     |
| 975  | IPI00134599 | 40S ribosomal protein            | Rps3                          | T221  | 1           | 7             | DEILPTPISEQK        | DEILPT(0.074)T(0.852)E | DEILPT(ph)PISEQK                   | WW GroupIV  | 1.1                       | 0.46552        |            | Yes                    |
| 932  | IPI00944141 | Putative uncharacterized protein | Rps5;mCG_22552;Rps5           | T2    | 1           | 1             | TEWEAATPAVAETPDIK   | T(0.997)EWEAAT(0.003   | T(ph)EWEAATPAVAET                  | CK2         | 1.1                       | 0.44979        |            | Yes                    |
| 1295 | IPI00114333 | Ribosomal protein S6 k           | Rps6ka3;Rps6ka-rs1;Rps6ka3    | S227  | 1           | 3             | AYSCFGTVEYMAPEVNR   | AY(0.489)S(0.489)FCGT  | AY(ph)SCFGTVEYMAPEVNR              |             |                           |                |            | No                     |
| 1300 | IPI00114333 | Ribosomal protein S6 k           | Rps6ka3;Rps6ka-rs1;Rps6ka3    | Y226  | 1           | 2             | AYSCFGTVEYMAPEVNR   | AY(0.489)S(0.489)FCGT  | AY(ph)SCFGTVEYMAPEVNR              |             |                           |                |            | No                     |
| 82   | IPI00411051 | Regulatory-associated            | Rptor;Raptor;Rptor;Raptor     | S863  | 1           | 14            | ILDTSSLTQSAPASPTNK  | ILDTSSLT(0.072)QS(0.0  | ILDTSSLTQSAPAS(ph)PTNK             | WW GroupIV  | 2.0                       | 0.0003539      | Up         | Yes                    |
| 613  | IPI00323822 | Ras-related protein R-R          | Rras2                         | S186  | 1           | 10            | KFQEQECPSPPEPTRK    | KFQEQECPSP(0.999)PE    | KFQEQECPSP(ph)PEPTRK               | WW GroupIV  | 1.0                       | 0.30625        |            | Yes                    |
| 277  | IPI00110856 | Ribosomal RNA process            | Rrp1;Nnp1;Rrp1;Nnp1           | S434  | 1           | 4             | EAGSEAESSADPPGGR    | EAGS(0.997)EAES(0.00   | EAGS(ph)EAESSADPPGGR               | CK2         | 0.9                       | 0.10861        |            | Yes                    |
| 962  | IPI00420344 | RRP12-like protein               | Rrp12;Kiaa0690                | S1081 | 1           | 11            | GDSIEEILADEDEEE     | GDSIEEILADS(1)EDEEE    | GDSIEEILADS(ph)EDEEE               | CK2         | 1.1                       | 0.46           |            | Yes                    |
| 269  | IPI00458958 | RRP15-like protein;Rib           | Rrp15                         | S265  | 1           | 6             | DWDKESGEEPPAGGR     | DWDKES(1)EGEEPAGGR     | DWDKES(ph)EGEEPAGGR                | CK2         | 1.4                       | 0.10616        |            | Yes                    |
| 948  | IPI00471271 | Rsrc2 protein                    | Rsrc2                         | S17   | 1           | 9             | DGLALEKTPSPDREK     | DGLALEKT(0.113)S(0.88  | DGLALEKTS(ph)PDREK                 | CDK2        | 1.1                       | 0.45571        |            | Yes                    |
| 656  | IPI00471271 | Rsrc2 protein                    | Rsrc2                         | S30   | 1           | 8             | KKEQSDISISPR        | KKEQSDIS(0.874)S(0.1   | KKEQSDIS(ph)ISPR                   | PLK1        | 1.2                       | 0.33288        |            | Yes                    |
| 473  | IPI00471271 | Rsrc2 protein                    | Rsrc2                         | S32   | 1           | 8             | EQSDISISPR          | EQSDIS(0.011)S(0.989)  | EQSDISIS(ph)ISPR                   | CDK1        | 1.0                       | 0.24433        |            | Yes                    |
| 898  | IPI00471271 | Rsrc2 protein                    | Rsrc2                         | T16   | 1           | 8             | DGLALEKTPSPDREK     | DGLALEKT(0.5)S(0.5)P   | DGLALEKTS(ph)PDREK                 | FHA1 Rad53p | 1.1                       | 0.43901        |            | No                     |
| 1282 | IPI00469392 | Reticulon-4;Neurite ou           | Rtn4;Kiaa0886;Nogo;Rtn4       | S832  | 1           | 2             | ESETSDSSPIIEIDFPFTF | ES(0.324)ET(0.324)FS(0 | ES(ph)ETSDSSPIIEIDFPFTF            | GSK3        |                           |                |            | No                     |
| 1288 | IPI00469392 | Reticulon-4;Neurite ou           | Rtn4;Kiaa0886;Nogo;Rtn4       | S836  | 1           | 6             | ESETSDSSPIIEIDFPFTF | ES(0.324)ET(0.324)FS(0 | ES(ph)ETSDSSPIIEIDFPFTF            | CK1         |                           |                |            | No                     |
| 734  | IPI00469392 | Reticulon-4;Neurite ou           | Rtn4;Kiaa0886;Nogo;Rtn4       | S953  | 1           | 8             | EAEKLPSTDEKEDR      | EAEKLP(0.573)DT(0.4    | EAEKLP(ph)STDEKEDR                 | CK2         | 1.2                       | 0.36494        |            | No                     |
| 1290 | IPI00469392 | Reticulon-4;Neurite ou           | Rtn4;Kiaa0886;Nogo;Rtn4       | T834  | 1           | 4             | ESETSDSSPIIEIDFPFTF | ES(0.324)ET(0.324)FS(0 | ES(ph)ETSDSSPIIEIDFPFTF            | FHA1 Rad53p |                           |                |            | No                     |
| 296  | IPI00469392 | Reticulon-4;Neurite ou           | Rtn4;Kiaa0886;Nogo;Rtn4       | S105  | 1           | 16            | GPLPAAPPTAPERQPS    | GPLPAAPPT(0.001)APE    | GPLPAAPPTAPERQPS                   | CAMK2       | 0.9                       | 0.12508        |            | Yes                    |
| 728  | IPI00470167 | RTN4;Reticulon 4                 | Rtn4;RP23-17605.4-00          | S165  | 1           | 3             | RGSVSVVVDLlyYR      | RGS(0.897)GS(0.103)V   | RGS(ph)GSVSVVVDLlyYR               | PKA/AKT     | 1.0                       | 0.36102        |            | Yes                    |
| 468  | IPI00122174 | MKIAA0138 protein;Sc             | Safb2;mKIAA0138;Safb2         | S404  | 1           | 7             | APTAALSPEPQDSK      | APTAALS(1)PEPQDSK      | APTAALS(ph)PEPQDSK                 | CK1         | 1.2                       | 0.24319        |            | Yes                    |
| 287  | IPI00122174 | MKIAA0138 protein;Sc             | Safb2;mKIAA0138;Safb2         | S410  | 1           | 13            | APTAALSPEPQDSKEDV   | APTAALS(0.011)PEPQD    | APTAALSPEPQDS(ph)KEDV              |             | 1.3                       | 0.11525        |            | Yes                    |
| 523  | IPI00719971 | Serine/threonine-prote           | Saps3;D19Erd703e;Kia          | S617  | 1           | 9             | IQQFDGGSDDEIWE      | IQQFDGG(1)DEEDIW       | IQQFDGGS(ph)DEEDIW                 | CK2         | 1.0                       | 0.26609        |            | Yes                    |
| 346  | IPI00338954 | SAM and SH3 domain-c             | Sash1                         | S829  | 1           | 1             | SHSLDQLGGDADVGK     | S(0.645)HS(0.355)LDL   | S(ph)SHSLDQLGGDADVGK               | CK1         | 0.9                       | 0.16552        |            | No                     |
| 877  | IPI00344430 | Splicing factor, arginine        | Scaf1;Sfrs19                  | S676  | 2           | 3             | APSPAPAVSPK         | APS(1)PAPAVS(1)PK      | APS(ph)PAPAVS(ph)PK                | CAMK2       | 1.1                       | 0.42825        |            | Yes                    |

| No   | IPI Numbers | Protein Names             | Gene Names              | pAA   | Number of P | Position in p | Peptide Sequence    | Phospho (STY) Probabi     | Modified Sequence                             | Best Motif  | Ratio <sup>1</sup> of Phd | Ratio Signifid | Up-/Down-r | Localized phosphosite? |
|------|-------------|---------------------------|-------------------------|-------|-------------|---------------|---------------------|---------------------------|-----------------------------------------------|-------------|---------------------------|----------------|------------|------------------------|
| 878  | IPI00344430 | Splicing factor, arginine | Scaf1;Sfrs19            | S682  | 2           | 9             | APSPAPAVSPK         | APS(1)PAPAVS(1)PK         | _APS(ph)PAPAVS(ph)PK                          | CDK2        | 1.1                       | 0.42825        |            | Yes                    |
| 320  | IPI00177200 | Scavenger receptor class  | Scarf2;Srec2            | S672  | 1           | 9             | HSAAAAAPSPPPAGR     | HSAAAAAPSP(1)PPPPAGR      | HSAAAAAPSP(ph)PPPPAGR                         |             | 0.9                       | 0.14346        |            | Yes                    |
| 1299 | IPI00454106 | Protein LAP4;Protein sc   | Scrib;Kiaa0147;Lap4;Sc  | S1536 | 2           | 12            | LAEAPSPAPTSPPTPLEDI | LAEAPSPAPT(0.002)PAPT(0.0 | LAEAPSPAPT(ph)PTPLEDFGLQTSASPRGLS(ph)PDFVEELR |             |                           |                | No         |                        |
| 132  | IPI00454106 | Protein LAP4;Protein sc   | Scrib;Kiaa0147;Lap4;Sc  | S1550 | 2           | 26            | LAEAPSPAPTSPPTPLEDI | LAEAPSPAPT(0.001)P        | LAEAPSPAPTSPPTPLED                            | CDK2        | 0.7                       | 0.011522       | Down       | Yes                    |
| 629  | IPI00454106 | Protein LAP4;Protein sc   | Scrib;Kiaa0147;Lap4;Sc  | S1555 | 2           | 31            | LAEAPSPAPTSPPTPLEDI | LAEAPSPAPT(0.001)P        | LAEAPSPAPTSPPTPLED                            | PKA         | 1.2                       | 0.31593        |            | Yes                    |
| 1304 | IPI00454106 | Protein LAP4;Protein sc   | Scrib;Kiaa0147;Lap4;Sc  | T1538 | 2           | 14            | LAEAPSPAPTSPPTPLEDI | LAEAPSPAPT(0.002)PAPT(0.0 | LAEAPSPAPT(ph)PT                              | CK2         |                           |                |            | No                     |
| 152  | IPI00454106 | Protein LAP4;Protein sc   | Scrib;Kiaa0147;Lap4;Sc  | S1497 | 1           | 3             | MKSLQEQDALR         | MKS(1)LEQDALAR            | M(ox)KS(ph)LEQDALAR                           | CAMK2       | 0.8                       | 0.021854       | Down       | Yes                    |
| 577  | IPI00454106 | Protein LAP4;Protein sc   | Scrib;Kiaa0147;Lap4;Sc  | S5508 | 1           | 17            | RNEAFVCKPDPSPSPSE   | RNEAFVCKPDPSP(0.003)      | RNEAFVCKPDPSPSPS                              | CK2         | 1.2                       | 0.28858        |            | Yes                    |
| 525  | IPI00135660 | Serum deprivation-res     | Sdpr;Sdr                | S287  | 2           | 1             | SSPFKVSPLSFR        | S(0.659)S(0.341)PFKVS     | S(ph)SPFKVS(ph)PLSF                           | CK1         | 1.0                       | 0.267          |            | No                     |
| 301  | IPI00135660 | Serum deprivation-res     | Sdpr;Sdr                | S288  | 2           | 7             | ASSGKSSPFKVSPLSFR   | AS(0.031)S(0.139)GKS      | ASSGKSS(ph)PFKVS                              | Polo box    | 1.3                       | 0.12823        |            | No                     |
| 1030 | IPI00135660 | Serum deprivation-res     | Sdpr;Sdr                | S293  | 1           | 7             | SSPFKVSPLSFR        | SSPFKVS(1)PLSFR           | SSPFKVS(ph)PLSFR                              |             | 1.1                       | 0.48883        |            | Yes                    |
| 662  | IPI00135660 | Serum deprivation-res     | Sdpr;Sdr                | S359  | 2           | 5             | RGNNSAVGSNADLTIEE   | RGNNNS(0.969)AVGS(0.7     | RGNNNS(ph)AVGS(ph)N                           | GSK3        | 1.0                       | 0.33549        |            | Yes                    |
| 353  | IPI00135660 | Serum deprivation-res     | Sdpr;Sdr                | S363  | 1           | 9             | RGNNSAVGSNADLTIEE   | RGNNNS(0.003)AVGS(0.4     | RGNNNSAVGS(ph)NAD                             | CK1         | 1.3                       | 0.17081        |            | Yes                    |
| 248  | IPI00135660 | Serum deprivation-res     | Sdpr;Sdr                | T368  | 1           | 14            | RGNNSAVGSNADLTIEE   | RGNNNS(0.021)AVGS(0.2     | RGNNNSAVGSNADLT                               | PLK         | 1.4                       | 0.093523       |            | No                     |
| 784  | IPI00648142 | Sec23ip protein;SEC23     | Sec23ip;Sec23ip         | S748  | 1           | 3             | KLSVGVAYVSSVR       | KL(1)VGVAYVSSVR           | KLS(ph)VGVAYVSSVR                             | CAMK2       | 1.0                       | 0.38511        |            | Yes                    |
| 1084 | IPI00648142 | Sec23ip protein;SEC23     | Sec23ip;Sec23ip         | S755  | 1           | 10            | KLSVGVAYVSSVR       | KL(0.026)VGVAY(0.026)     | KLSVGVAYSS(ph)VR                              |             |                           |                |            | Yes                    |
| 323  | IPI00377592 | Protein transport prote   | Sec31a;Sec311           | S614  | 2           | 2             | DSQDVAQSDGEEESPAAB  | DS(0.784)DQVAQS(0.75      | DS(ph)DQVAQS(ph)D                             | NEK6        | 0.9                       | 0.14455        |            | No                     |
| 669  | IPI00377592 | Protein transport prote   | Sec31a;Sec311           | S620  | 1           | 8             | DSQDVAQSDGEEESPAAB  | DSQDVAQS(1)DGEEESPA       | DSQDVAQS(ph)DGEEES                            | CK2         | 1.0                       | 0.33958        |            | Yes                    |
| 1204 | IPI00133030 | Protein transport prote   | Sec61b                  | S13   | 1           | 12            | PGPTPSGTNVGSSGRSP   | PGPT(0.074)PS(0.126)G     | PGPTPSGTNVGSS(ph)S                            | GSK3        |                           |                |            | No                     |
| 937  | IPI00133030 | Protein transport prote   | Sec61b                  | S14   | 1           | 13            | PGPTPSGTNVGSSGRSP   | PGPTPSGT(0.001)NVGS       | PGPTPSGTNVGSS(ph)GR                           | SPSK        | 1.1                       | 0.45198        |            | Yes                    |
| 155  | IPI00133030 | Protein transport prote   | Sec61b                  | S17   | 1           | 16            | PGPTPSGTNVGSSGRSP   | PGPTPSGTNVGSS(0.002       | (ca)PGPTPSGTNVGSS                             | CDK2        | 0.8                       | 0.02503        | Down       | Yes                    |
| 1210 | IPI00133030 | Protein transport prote   | Sec61b                  | S19   | 1           | 18            | PGPTPSGTNVGSSGRSP   | PGPT(0.19)PS(0.19)GT      | PGPTPSGTNVGSSGRS                              | CAMK2       |                           |                |            | No                     |
| 930  | IPI00133030 | Protein transport prote   | Sec61b                  | S7    | 1           | 6             | PGPTPSGTNVGSSGRSP   | PGPT(0.001)PS(0.531)G     | PGPTPS(ph)GTNVGSSGR                           | SPSK        | 1.1                       | 0.44919        |            | No                     |
| 1215 | IPI00133030 | Protein transport prote   | Sec61b                  | T9    | 1           | 8             | PGPTPSGTNVGSSGRSP   | PGPT(0.175)PS(0.175)G     | (ca)PGPT(ph)PSGTNVG                           | SSGRSPSK    |                           |                |            | No                     |
| 946  | IPI00134398 | Translocation protein S   | Sec62;Tloc1             | T375  | 1           | 7             | ELEEQTQDGDGDEEDDD   | ELEEQT(1)DGDGDEED         | ELEEQT(ph)DGDGDEE                             | FHA1 Rad53p | 1.1                       | 0.45482        |            | Yes                    |
| 48   | IPI00403228 | Sentrin-specific proteas  | Senp7;Kiaa1707;Susp2    | S12   | 1           | 3             | RASSEIVTEGK         | RAS(1)SEIVTEGK            | _RAS(ph)SEIVTEGK                              | PKA         | 2.7                       | 1.541E-07      | Up         | Yes                    |
| 817  | IPI00114945 | Septin-2;Neural precur    | Sept2;Nedd-5;Nedd5      | S218  | 1           | 9             | IYHLPAESEDDEDFEKQ   | IYHLPAEAS(1)DEDEDFEK      | IYHLPAEAS(ph)DEDEDFE                          | KQTR        | 1.0                       | 0.39827        |            | Yes                    |
| 209  | IPI00923056 | Sept5 protein;Septin-5    | Sept5;Sept5;Pnut1;Sep   | S339  | 1           | 3             | MESPILPLPTPAETEK    | MES(1)PILPLPTPAET         | M(ox)ES(ph)PILPLPT                            | CAMK2       | 0.8                       | 0.061755       |            | Yes                    |
| 985  | IPI00923056 | Sept5 protein;Septin-5    | Sept5;Sept5;Pnut1;Sep   | S225  | 1           | 13            | FGIHYVQFPECDSDDED   | FGIHYVQFPECDSD(1)DEE      | FGIHYVQFPECDSD(ph)DE                          | EDDFKQQR    | 1.1                       | 0.46906        |            | Yes                    |
| 106  | IPI00457611 | Septin-9;SL3-3 integr     | Sept9;Kiaa0991;Sint1;S  | S530  | 1           | 1             | SFEVEEIEPPNTPPR     | S(1)FEVEEIEPPNTPPR        | _S(ph)FEVEEIEPPNTPP                           | NIMA        | 0.7                       | 0.0019236      | Down       | Yes                    |
| 183  | IPI00457611 | Septin-9;SL3-3 integr     | Sept9;Kiaa0991;Sint1;S  | S585  | 1           | 9             | LVDSLSQRSQPKPSLR    | LVDS(0.006)LS(0.028)G     | LVDSLSQRS(ph)PKPSL                            | CDK1        | 0.8                       | 0.043848       | Down       | Yes                    |
| 57   | IPI00457611 | Septin-9;SL3-3 integr     | Sept9;Kiaa0991;Sint1;S  | T143  | 1           | 9             | RAEVLGHKTPPEVPR     | RAEVLGHK(1)PEVPR          | RAEVLGHK(ph)PEVPR                             |             | 0.5                       | 2.081E-06      | Down       | Yes                    |
| 524  | IPI00462466 | MKIAA1732 protein         | Setd2;BC031601;MKIA     | S633  | 1           | 5             | KLDESPLVKPEFIGHDGR  | KLDES(1)PVLPKPEFIGHD      | KLDES(ph)PVLPKPEFIGH                          | NEK6        | 1.0                       | 0.26637        |            | Yes                    |
| 578  | IPI00454015 | Splicing factor 4         | Sf4                     | S483  | 1           | 11            | ALQQHQHQYDSDDEEVD   | ALQQHQHQY(0.203)DS        | ALQQHQHQYDSD(ph)D                             | CK2         | 1.2                       | 0.28917        |            | Yes                    |
| 283  | IPI00420807 | Splicing factor, arginine | Sfrs1                   | S199  | 1           | 6             | VDGPRSPSYGR         | VDGPRS(0.984)PS(0.01      | VDGPRS(ph)PSYGR                               | WW GroupIV  | 1.3                       | 0.11234        |            | Yes                    |
| 1123 | IPI00420807 | Splicing factor, arginine | Sfrs1                   | S201  | 1           | 10            | VKVDGPRSPSYGR       | VKVDGPRS(0.237)PS(0.      | VKVDGPRSPS(ph)YGR                             | CAMK2       |                           |                |            | No                     |
| 383  | IPI00848672 | Putative uncharacterize   | Sfrs11;mCG_11658;Sfr    | S462  | 1           | 11            | DYDEEEQGYDSEKEKK    | DYDEEEQGY(0.003)DS        | (ph)DYDEEEQGYDSEK                             | CK2         | 1.3                       | 0.19444        |            | Yes                    |
| 696  | IPI00848672 | Putative uncharacterize   | Sfrs11;mCG_11658;Sfr    | S477  | 1           | 7             | RPTAEVSPK           | RPTAEV(1)PK               | _RPTAEV(ph)PK                                 | CDK1        | 1.2                       | 0.34837        |            | Yes                    |
| 1075 | IPI00848672 | Putative uncharacterize   | Sfrs11;mCG_11658;Sfr    | S510  | 1           | 14            | VNGDDHHEEDMDMSD     | VNGDDHHEEDMDMS(1)         | VNGDDHHEEDM(ox)D                              | M(ox)S(ph)D |                           |                |            | Yes                    |
| 721  | IPI00474430 | Putative uncharacterize   | Sfrs2;Sfrs2;Pr264;Sfrs1 | S26   | 1           | 9             | VDNLTVRTSPDTLRR     | VDNLT(0.004)Y(0.02)RT     | VDNLTVRTS(ph)PDTLR                            | PKA         | 1.2                       | 0.35856        |            | Yes                    |
| 249  | IPI00474430 | Putative uncharacterize   | Sfrs2;Sfrs2;Pr264;Sfrs1 | T25   | 1           | 12            | VDNLTVRTSPDTLRR     | VDNLT(0.004)Y(0.035)R     | VDNLTVRT(ph)SPDTLR                            | FHA1 Rad53p | 1.4                       | 0.093959       |            | No                     |
| 1078 | IPI00474430 | Putative uncharacterize   | Sfrs2;Sfrs2;Pr264;Sfrs1 | T29   | 1           | 8             | VDNLTVRTSPDTLRR     | VDNLTVRT(0.001)S(0.4      | VDNLTVRTS(ph)PDTLR                            | CK1         |                           |                |            | No                     |
| 1170 | IPI00874991 | MKIAA3013 protein;Sfr     | Sfrs2ip;mKIAA3013;Sfr   | S884  | 1           | 11            | ETVVESQSSQSPSPK     | ET(0.001)VVES(0.029)G     | ETVVESQSSQS(ph)PSP                            | CK1         |                           |                |            | Yes                    |
| 431  | IPI00874991 | MKIAA3013 protein;Sfr     | Sfrs2ip;mKIAA3013;Sfr   | S886  | 1           | 13            | ETVVESQSSQSPSPK     | ETVVESQSSQS(0.001)P       | ETVVESQSSQS(ph)P                              | CDK2        | 1.0                       | 0.22498        |            | Yes                    |
| 704  | IPI00310880 | Putative uncharacterize   | Sfrs6;mCG_1675          | S301  | 1           | 1             | SHSPLPAPPSK         | S(0.642)HS(0.358)PLPA     | S(ph)HSPLPAPPSK                               | CK1         | 1.2                       | 0.35166        |            | No                     |
| 831  | IPI00310880 | Putative uncharacterize   | Sfrs6;mCG_1675          | S303  | 1           | 3             | SHSPLPAPPSK         | S(0.011)HS(0.989)PLPA     | SHS(ph)PLPAPPSK                               | CAMK2       | 1.0                       | 0.40577        |            | Yes                    |
| 560  | IPI00310880 | Putative uncharacterize   | Sfrs6;mCG_1675          | S45   | 1           | 11            | NGYGFVEFEDSRDADDA   | NGYGFVEFEDS(1)RDAD        | NGYGFVEFEDS(ph)RDAD                           | DAVVELNSK   | 1.0                       | 0.28138        |            | Yes                    |
| 83   | IPI00116331 | Small glutamine-rich te   | Sgta;Sgt;Sgta;Sgt       | S303  | 1           | 1             | SRTPSASHEEQQE       | S(0.585)RT(0.373)PS(0.    | S(ph)RTPSASHEEQQE                             | GSK3        | 2.0                       | 0.0003747      | Up         | No                     |
| 291  | IPI00116331 | Small glutamine-rich te   | Sgta;Sgt;Sgta;Sgt       | T305  | 1           | 3             | SRTPSASHEEQQE       | S(0.138)RT(0.737)PS(0.    | (ca)SRT(ph)PSASHEE                            | PKA/AKT     | 0.9                       | 0.12122        |            | No                     |
| 991  | IPI00116331 | Small glutamine-rich te   | Sgta;Sgt;Sgta;Sgt       | T82   | 1           | 5             | APDRTPPSEEDSAEAE    | APDRTP(0.997)PPS(0.00     | APDRTP(ph)PSEEDSAE                            | FHA KAPP    | 1.1                       | 0.47187        |            | Yes                    |
| 394  | IPI00116907 | SH3 domain-binding pr     | Sh3bp5;Kiaa1720;Sh3b    | S377  | 1           | 3             | RGSDIGVR            | RGS(1)DIGVR               | _RGS(ph)DIGVR                                 | PKA/AKT     | 0.9                       | 0.20231        |            | Yes                    |
| 1335 | IPI00312752 | Endophilin-A2;Endophi     | Sh3gl1;Sh3d2b           | S286  | 1           | 4             | ITASSFR             | ITAS(0.333)S(0.333)S      | ITAS(ph)SFR                                   |             |                           |                |            | No                     |
| 401  | IPI00312752 | Endophilin-A2;Endophi     | Sh3gl1;Sh3d2b           | S287  | 1           | 5             | ITASSFR             | ITAS(0.008)S(0.917)S      | ITAS(ph)SFR                                   | GSK3        | 0.9                       | 0.2065         |            | Yes                    |
| 395  | IPI00312752 | Endophilin-A2;Endophi     | Sh3gl1;Sh3d2b           | S288  | 1           | 6             | ITASSFR             | ITAS(0.037)S(0.963)FR     | ITASSS(ph)FR                                  | GSK3        | 0.9                       | 0.20297        |            | Yes                    |
| 199  | IPI00466258 | SH3 domain-containing     | Sh3kbp1;Ruk;Seta;Sh3    | S274  | 1           | 1             | SIEVENDFLPVEK       | S(1)IEVENDFLPVEK          | _S(ph)IEVENDFLPVEK                            | CAMK2       | 1.4                       | 0.054872       |            | Yes                    |
| 388  | IPI00125298 | SHC-transforming prot     | Shc1;Shc;ShcA;Shc1;Sh   | Y423  | 1           | 8             | ELFDDPSYVNIQNLDK    | ELFDDPS(0.067)Y(0.93      | ELFDDPSYVNIQNL                                | EGFR        | 3.7                       | 9.86E-13       | Up         | Yes                    |
| 844  | IPI00117932 | Paired amphipathic hel    | Sin3a;Sin3a;Sin3a;Sin3  | S833  | 1           | 4             | GDLSDVEEEEEEMDVED   | GDLS(1)DVVEEEEEEMD        | GDLS(ph)DVVEEEEEEM                            | CK2         | 1.1                       | 0.4112         |            | Yes                    |
| 681  | IPI00117932 | Paired amphipathic hel    | Sin3a;Sin3a;Sin3a;Sin3  | T849  | 1           | 20            | GDLSDVEEEEEEMDVED   | GDLS(0.366)DVVEEEEE       | GDLSDVEEEEEEMDVEAT                            | (ph)GAPK    | 1.0                       | 0.34219        |            | No                     |
| 843  | IPI00453688 | Signal-induced prolifer   | Sipa11;Kiaa0440;Sipa1   | S1564 | 1           | 3             | TLSDESIYSSQR        | TLS(1)DESIYSSQR           | _TLS(ph)DESIYSSQR                             | CHK1/2      | 1.1                       | 0.41107        |            | Yes                    |
| 858  | IPI00454140 | MCG15924, isoform CR      | Sktiv2;Ski;Ski19;mCG    | S252  | 1           | 2             | ASLLEDLVLK          | AS(0.5)S(0.5)LEDLVLK      | AS(ph)SLEDLVLK                                | PKA         | 1.1                       | 0.42037        |            | No                     |
| 1018 | IPI00454140 | MCG15924, isoform CR      | Sktiv2;Ski;Ski19;mCG    | S253  | 1           | 3             | ASLLEDLVLK          | AS(0.003)S(0.997)LEDL     | AS(ph)LEDLVLK                                 | CHK1/2      | 1.1                       | 0.48476        |            | Yes                    |
| 471  | IPI00137194 | Monocarboxylate trans     | Slc16a1;Mct1            | S213  | 1           | 4             | SKESLQEAGK          | SKES(1)LQEAGK             | SKES(ph)LQEAGK                                | AURORA      | 1.0                       | 0.24403        |            | Yes                    |
| 838  | IPI00137194 | Monocarboxylate trans     | Slc16a1;Mct1            | S461  | 1           | 8             | EGKDEASTDVDEKPK     | EGKDEAS(0.5)T(0.5)DV      | EGKDEAS(ph)TDVDEKPK                           |             | 1.1                       | 0.40892        |            | No                     |
| 986  | IPI00137194 | Monocarboxylate trans     | Slc16a1;Mct1            | T462  | 1           | 9             | EGKDEASTDVDEKPK     | EGKDEAS(0.217)T(0.7       | EGKDEAS(ph)DVDE                               | FHA1 Rad53p | 1.1                       | 0.46956        |            | Yes                    |
| 521  | IPI00880321 | Putative uncharacterize   | Slc4a1ap;Slc4a1ap;Slc4  | S258  | 1           | 6             | MLGEDSDEEEEEANTTEG  | MLGEDS(1)DEEEEAANT        | M(ox)LGEDS(ph)DEEE                            | CK2         | 1.2                       | 0.26499        |            | Yes                    |
| 592  | IPI00622815 | Sodium/hydrogen exch      | Slc9a1;Slc9a1;Nhe1      | S697  | 1           | 3             | LDSPTLSR            | LDS(1)PTLSR               | _LDS(ph)PTLSR                                 | GSK3        | 1.0                       | 0.29559        |            | Yes                    |

| No   | IPI Numbers | Protein Names            | Gene Names             | pAA   | Number of P | Position in p | Peptide Sequence    | Phospho (STY) Probabi   | Modified Sequence     | Best Motif | Ratio <sup>1</sup> of Phs | Ratio Signif | Up-/Down-r | Localized phosphosite? |
|------|-------------|--------------------------|------------------------|-------|-------------|---------------|---------------------|-------------------------|-----------------------|------------|---------------------------|--------------|------------|------------------------|
| 1085 | IPI00622815 | Sodium/hydrogen exch     | Slc9a1;Slc9a1;Nhe1     | S701  | 1           | 18            | ITNYLTVPAHKLDSPTLSR | IT(0.023)NY(0.052)LT(0  | ITNYLTVPAHKLDS(ph)    | CK1        |                           |              |            | No                     |
| 25   | IPI00622815 | Sodium/hydrogen exch     | Slc9a1;Slc9a1;Nhe1     | S707  | 1           | 3             | IGSDPLAYEYK         | IGS(1)DPLAYEYK          | IGS(ph)DPLAYEYK       | PKA/AKT    | 7.3                       | 4.139E-28    | Up         | Yes                    |
| 205  | IPI00109311 | Na(+)/H(+) exchange re   | Slc9a3r1;Nherf;Nherf1  | S283  | 1           | 1             | SASDSTSEELNSQDSQK   | S(0.713)AS(0.276)JS(0.0 | S(ph)ASDSTSEELNSQD    | NEK6       | 0.8                       | 0.060013     |            | No                     |
| 904  | IPI00318935 | SRA stem-loop-interact   | Slirp                  | T104  | 1           | 7             | ALHGAQTSDEER        | ALHGAQT(0.963)S(0.03    | ALHGAQT(ph)SDEER      | CK2        | 1.1                       | 0.44194      |            | Yes                    |
| 467  | IPI00229571 | SAFB-like transcription  | Sltm;Met;Sltm;Met;Slt  | S289  | 1           | 9             | DVQDAIAQSQPEKAK     | DVQDAIAQSQ(1)PEKAK      | DVQDAIAQSQ(ph)PEKAK   | CDK2       | 1.2                       | 0.24218      |            | Yes                    |
| 977  | IPI00127941 | Small acidic protein;Sid | Smcp;Sid2057           | S15   | 1           | 1             | SASPDDDLGSSNWEEAAS  | S(0.69)AS(0.31)PDDDLG   | S(ph)ASPDGSSNWEEAADL  | LGNEER     | 1.1                       | 0.46645      |            | No                     |
| 953  | IPI00127941 | Small acidic protein;Sid | Smcp;Sid2057           | S17   | 1           | 4             | RSAPDDDLGSSNWEEAAS  | RS(0.172)AS(0.6)PDDDLG  | RSAS(ph)PDDDLGSSNW    | PKA        | 1.1                       | 0.45749      |            | No                     |
| 1192 | IPI00127941 | Small acidic protein;Sid | Smcp;Sid2057           | S24   | 1           | 10            | SASPDDDLGSSNWEEAAS  | S(0.16)AS(0.151)PDDDLG  | SASPDDDLGSSNWEEAADL   | LGNEER     |                           |              |            | No                     |
| 1196 | IPI00127941 | Small acidic protein;Sid | Smcp;Sid2057           | S25   | 1           | 11            | SASPDDDLGSSNWEEAAS  | S(0.16)AS(0.151)PDDDLG  | SASPDDDLGSSNWEEAADL   | CK2        |                           |              |            | No                     |
| 899  | IPI00460668 | Putative uncharacterize  | Smarc4;Smarc4;Brg1     | T1393 | 1           | 8             | DSEAGSPTTSTR        | DSEAGS(0.001)S(0.064)   | DSEAGSST(ph)PTTSTR    | Polo box   | 1.1                       | 0.43935      |            | Yes                    |
| 891  | IPI00459742 | SWI/SNF complex subu     | Smarc2;Baf170;Smarc    | S347  | 1           | 6             | DMDEPSPVNPVEEVLTP   | DMDEPS(1)PVPNVEEVT      | DMDEPS(ph)PVPNVEEVLTP |            | 1.1                       | 0.4337       |            | Yes                    |
| 747  | IPI00132122 | Structural maintenance   | Smc3;Bam;Bmh;Cspg6     | S1065 | 1           | 7             | KGDVEGSSQSQDEGE     | KGDVEGS(0.5)QS(0.5)Q    | KGDVEGS(ph)QSQSQDEGE  | GESER      | 1.2                       | 0.37091      |            | No                     |
| 748  | IPI00132122 | Structural maintenance   | Smc3;Bam;Bmh;Cspg6     | S1067 | 1           | 9             | KGDVEGSSQSQDEGE     | KGDVEGS(0.5)QS(0.5)Q    | KGDVEGS(ph)QSQSQDEGE  | CK2        | 1.2                       | 0.37091      |            | No                     |
| 571  | IPI00420329 | MKIAA0788 protein;Pu     | Snrp200;Asc31;mkI      | S225  | 1           | 4             | EEASDDMMEGDEAVVR    | EEAS(1)DDMMEGDEAVR      | EEAS(ph)DDMMEGDEAVR   |            | 1.0                       | 0.28577      |            | Yes                    |
| 796  | IPI00625105 | U1 small nuclear ribon   | Snrnp70;Snrp70         | S226  | 1           | 8             | YDERPGSPPLPHR       | YDERPGS(1)PLPHR         | YDERPGS(ph)PLPHR      |            | 1.1                       | 0.38931      |            | Yes                    |
| 1032 | IPI00849318 | Beta-2-syntrophin;59 k   | Sntb2;Snt2b2;Sntb2     | S88   | 1           | 7             | GPAGEASASPPVRR      | GPAGEAS(0.817)AS(0.1    | GPAGEAS(ph)ASPPVRR    |            | 1.1                       | 0.48918      |            | Yes                    |
| 342  | IPI00849318 | Beta-2-syntrophin;59 k   | Sntb2;Snt2b2;Sntb2     | S90   | 1           | 9             | GPAGEASASPPVRR      | GPAGEAS(0.003)AS(0.9    | GPAGEASAS(ph)PPVRR    |            | 0.9                       | 0.16237      |            | Yes                    |
| 1050 | IPI00317298 | SNW domain-containin     | Snw1;Skipp             | S224  | 2           | 4             | GPPSPAPVMHSPSRK     | GPPS(1)PPAPVMHS(0.6     | GPPS(ph)PPAPVMHS(     | WW GroupIV | 1.1                       | 0.49871      |            | Yes                    |
| 973  | IPI00317298 | SNW domain-containin     | Snw1;Skipp             | S232  | 2           | 12            | GPPSPAPVMHSPSRK     | GPPS(1)PPAPVMHS(0.6     | GPPS(ph)PPAPVMHS(     | CDK2       | 1.1                       | 0.46529      |            | No                     |
| 935  | IPI00317298 | SNW domain-containin     | Snw1;Skipp             | S234  | 2           | 14            | GPPSPAPVMHSPSRK     | GPPS(0.996)PPAPVMHS     | GPPS(ph)PPAPVMHSPS    | (ph)RK     | 1.1                       | 0.45079      |            | No                     |
| 168  | IPI00654133 | Protein SOLO;Protein S   | Solo;Solo;Solo;Solo    | S959  | 1           | 11            | RIQQQLGEEASPR       | RIQQQLGEEAS(1)PR        | RIQQQLGEEAS(ph)PR     | CDK1       | 0.8                       | 0.035197     | Down       | Yes                    |
| 549  | IPI00828218 | SON protein;MKIAA101     | Son;Son;mkIAA101;S     | S1723 | 1           | 11            | ESQAQAVAVALSFK      | ESQAQAVAVALS(1)PK       | ESQAQAVAVALS(ph)PK    | CDK1       | 1.2                       | 0.27556      |            | Yes                    |
| 1090 | IPI00129831 | Soritin-related recepto  | Sor1;Sor1              | S1583 | 1           | 4             | KMPASCVVNVYR        | KMPAS(1)ACVNVVYR        | (ca)KMPAS(ph)ACVNVVYR |            |                           |              |            | Yes                    |
| 355  | IPI00753815 | Spectrin alpha chain, b  | Sptan1;Spna2;Spta2;Sp  | S1029 | 1           | 7             | KLDPAQASRENLEEQK    | KLDPAQS(0.977)AS(0.0    | KLDPAQS(ph)ASRENLEEQ  | SIALR      | 0.9                       | 0.17232      |            | Yes                    |
| 236  | IPI00753815 | Spectrin alpha chain, b  | Sptan1;Spna2;Spta2;Sp  | S1031 | 1           | 9             | KLDPAQASRENLEEQK    | KLDPAQS(0.044)AS(0.9    | KLDPAQASAS(ph)RENLEEQ | SIALR      | 0.9                       | 0.082263     |            | Yes                    |
| 358  | IPI00753815 | Spectrin alpha chain, b  | Sptan1;Spna2;Spta2;Sp  | S1217 | 1           | 1             | SLQLLAEER           | S(1)LQLLAEER            | S(ph)LQLLAEER         | CAMK2      | 0.9                       | 0.17344      |            | Yes                    |
| 490  | IPI00319830 | Spectrin beta chain, br  | Sptbn1;Elf;Sptn-2;Sptn | S2102 | 1           | 4             | RPPSPDPNTK          | RPPS(1)PDPNTK           | RPPS(ph)PDPNTK        | WW GroupIV | 1.0                       | 0.25207      |            | Yes                    |
| 427  | IPI00319830 | Spectrin beta chain, br  | Sptbn1;Elf;Sptn-2;Sptn | T2107 | 1           | 9             | RPPSPDPNTK          | RPPSPDPNT(1)K           | RPPSPDPNT(ph)K        | FHA KAPP   | 1.0                       | 0.22384      |            | Yes                    |
| 708  | IPI00222801 | Neuronal proto-oncoge    | Src;Src;RP23-169M4.1   | S17   | 1           | 1             | SLEPSENVHGAGGAFPA   | S(0.851)LEPS(0.149)EN   | S(ph)LEPSENVHGAGG     | AURORA-A   | 1.0                       | 0.35449      |            | Yes                    |
| 651  | IPI00605037 | Serine/arginine repetit  | Srrm1;Pop101;Srrm1;R   | S915  | 1           | 5             | KETESAEDDNLDDL      | KETES(1)EAEDDNLDDL      | KETES(ph)EAEDDNLDDL   | CK2        | 1.2                       | 0.32995      |            | Yes                    |
| 474  | IPI00605037 | Serine/arginine repetit  | Srrm1;Pop101;Srrm1;R   | T913  | 2           | 3             | KETESAEDDNLDDL      | KET(1)ES(1)EAEDDNLDDL   | KET(ph)ES(ph)EAEDDNL  | PKA        | 1.2                       | 0.24489      |            | Yes                    |
| 725  | IPI00605037 | Serine/arginine repetit  | Srrm1;Pop101;Srrm1;R   | S220  | 1           | 3             | EKSELPPEPSVR        | EKS(1)PELPPEPSVR        | EKS(ph)PELPPEPSVR     |            | 1.2                       | 0.35984      |            | Yes                    |
| 372  | IPI00605037 | Serine/arginine repetit  | Srrm1;Pop101;Srrm1;R   | S260  | 1           | 14            | APKPEPVPPEKPSPEK    | APKPEPVPPEKPS(1)PE      | APKPEPVPPEKPS(ph)     | CDK2       | 1.3                       | 0.18367      |            | Yes                    |
| 462  | IPI00605037 | Serine/arginine repetit  | Srrm1;Pop101;Srrm1;R   | S387  | 2           | 3             | RLSPASAPPR          | RLS(0.992)PS(0.086)AS   | (ca)RLS(ph)PSAS(ph)P  | PKA/AKT    | 1.2                       | 0.24051      |            | Yes                    |
| 463  | IPI00605037 | Serine/arginine repetit  | Srrm1;Pop101;Srrm1;R   | S391  | 2           | 7             | RLSPASAPPR          | RLS(0.935)PS(0.071)AS   | RLS(ph)PSAS(ph)PPR    | CDK2       | 1.2                       | 0.24051      |            | Yes                    |
| 585  | IPI00605037 | Serine/arginine repetit  | Srrm1;Pop101;Srrm1;R   | S400  | 2           | 4             | HRPSPATPPP          | HRPS(0.986)S(0.899)PA   | HRPS(ph)S(ph)PATPPP   | PKA        | 1.2                       | 0.29215      |            | Yes                    |
| 586  | IPI00605037 | Serine/arginine repetit  | Srrm1;Pop101;Srrm1;R   | S401  | 2           | 5             | HRPSPATPPP          | HRPS(0.986)S(0.899)PA   | HRPS(ph)S(ph)PATPPP   | PKA/AKT    | 1.2                       | 0.29215      |            | Yes                    |
| 713  | IPI00605037 | Serine/arginine repetit  | Srrm1;Pop101;Srrm1;R   | S448  | 1           | 3             | RESPSPAPKPR         | RES(0.916)PS(0.084)PA   | RES(ph)PSAPKPR        | PKA        | 1.2                       | 0.35731      |            | Yes                    |
| 330  | IPI00605037 | Serine/arginine repetit  | Srrm1;Pop101;Srrm1;R   | S450  | 1           | 5             | RESPSPAPKPR         | RES(0.071)PS(0.929)PA   | (ca)RESPS(ph)PAPKPR   |            | 1.3                       | 0.14992      |            | Yes                    |
| 47   | IPI00605037 | Serine/arginine repetit  | Srrm1;Pop101;Srrm1;R   | S461  | 1           | 5             | KVELSEEDKGSK        | KVELS(0.739)ES(0.217)   | (ca)KVELS(ph)EEDK     | CK2        | 2.8                       | 4.712E-08    | Up         | No                     |
| 356  | IPI00605037 | Serine/arginine repetit  | Srrm1;Pop101;Srrm1;R   | S463  | 1           | 7             | KVELSEEDKGSK        | KVELS(0.103)ES(0.895)   | KVELSES(ph)EEDKGSK    | NEK6       | 1.3                       | 0.17238      |            | Yes                    |
| 487  | IPI00605037 | Serine/arginine repetit  | Srrm1;Pop101;Srrm1;R   | S572  | 2           | 3             | RRSPSPAPPPPPPPPP    | RRS(1)PS(1)PAPPPPPPP    | RRS(ph)PS(ph)PAPPPPP  | PKA/AKT    | 1.2                       | 0.25054      |            | Yes                    |
| 488  | IPI00605037 | Serine/arginine repetit  | Srrm1;Pop101;Srrm1;R   | S574  | 2           | 5             | RRSPSPAPPPPPPPPP    | RRS(1)PS(1)PAPPPPPPP    | RRS(ph)PS(ph)PAPPPPP  | PKA/AKT    | 1.2                       | 0.25054      |            | Yes                    |
| 641  | IPI00605037 | Serine/arginine repetit  | Srrm1;Pop101;Srrm1;R   | S616  | 1           | 3             | RYSPPPIQR           | RY(S)PPIQR              | RY(S(ph)PPIQR         | PKA        | 1.2                       | 0.32378      |            | Yes                    |
| 418  | IPI00605037 | Serine/arginine repetit  | Srrm1;Pop101;Srrm1;R   | S635  | 1           | 3             | TASPPPPPKR          | T(0.014)AS(0.986)PPPP   | TAS(ph)PPPPPKR        | CAMK2      | 1.3                       | 0.21719      |            | Yes                    |
| 1008 | IPI00605037 | Serine/arginine repetit  | Srrm1;Pop101;Srrm1;R   | S713  | 1           | 5             | APQTSPPPPVR         | APQT(0.002)S(0.956)S    | APQTS(ph)SPPPPVR      |            | 1.1                       | 0.48071      |            | Yes                    |
| 686  | IPI00605037 | Serine/arginine repetit  | Srrm1;Pop101;Srrm1;R   | S714  | 1           | 6             | APQTSPPPPVR         | APQT(0.012)S(0.159)S    | APQTS(ph)SPPPPVR      | Polo box   | 1.2                       | 0.34472      |            | Yes                    |
| 1197 | IPI00605037 | Serine/arginine repetit  | Srrm1;Pop101;Srrm1;R   | T712  | 1           | 4             | APQTSPPPPVR         | APQT(0.451)S(0.451)S    | APQT(ph)SPPPPVR       |            |                           |              |            | No                     |
| 379  | IPI00874854 | Srrm2 protein            | Srrm2                  | S1269 | 1           | 17            | AAETPAVASCWSGPQV    | AAETPAVASCWSGPQV        | AAETPAVASCWSGPQV      | (ph)PEHK   | 0.9                       | 0.18792      |            | Yes                    |
| 290  | IPI00785240 | Serine/arginine repetit  | Srrm2;Kiaa0324;Srrm2   | S2535 | 1           | 4             | RVPSPTVPVK          | RVPS(0.997)PT(0.003)P   | RVPS(ph)PTVPVK        | PKA        | 1.3                       | 0.11908      |            | Yes                    |
| 340  | IPI00785240 | Serine/arginine repetit  | Srrm2;Kiaa0324;Srrm2   | T2537 | 1           | 6             | RVPSPTVPVK          | RVPS(0.001)PT(0.999)P   | RVPSPT(ph)VPVK        |            | 1.3                       | 0.16183      |            | Yes                    |
| 1230 | IPI00785240 | Serine/arginine repetit  | Srrm2;Kiaa0324;Srrm2   | S1066 | 1           | 1             | SSSPVTELTAR         | S(0.44)S(0.268)S(0.268  | (ca)SSSPVTELTAR       | NEK6       |                           |              |            | No                     |
| 1048 | IPI00785240 | Serine/arginine repetit  | Srrm2;Kiaa0324;Srrm2   | S1068 | 1           | 3             | SSSPVTELTAR         | SSS(1)PVTELTAR          | SSS(ph)PVTELTAR       | CHK1/2     | 1.1                       | 0.49704      |            | Yes                    |
| 783  | IPI00785240 | Serine/arginine repetit  | Srrm2;Kiaa0324;Srrm2   | S1077 | 2           | 12            | SSSPVTELTARSPVQDK   | S(0.174)S(0.148)S(0.64  | SSS(ph)PVTELTAR       | (ph)CDK2   | 1.1                       | 0.385        |            | No                     |
| 884  | IPI00785240 | Serine/arginine repetit  | Srrm2;Kiaa0324;Srrm2   | S1097 | 1           | 4             | SGMSPPEQSK          | SGMS(1)PEQSK            | SGMS(ph)PEQSK         | CK1        | 1.1                       | 0.43122      |            | Yes                    |
| 1224 | IPI00785240 | Serine/arginine repetit  | Srrm2;Kiaa0324;Srrm2   | S1101 | 1           | 8             | SGMSPPEQSK          | S(0.037)GMS(0.482)PE    | SGMS(ph)PEQSK         | CK1        |                           |              |            | No                     |
| 719  | IPI00785240 | Serine/arginine repetit  | Srrm2;Kiaa0324;Srrm2   | S1151 | 1           | 4             | DKFSPTQDRPESSTVLK   | DKFS(0.887)PT(0.091)C   | DKFS(ph)PTQDRPESSTVLK |            | 1.2                       | 0.35849      |            | Yes                    |
| 744  | IPI00785240 | Serine/arginine repetit  | Srrm2;Kiaa0324;Srrm2   | S1160 | 1           | 13            | DKFSPTQDRPESSTVLK   | DKFS(0.086)PT(0.086)C   | DKFS(ph)PTQDRPESSTVLK |            | 1.2                       | 0.37029      |            | No                     |
| 808  | IPI00785240 | Serine/arginine repetit  | Srrm2;Kiaa0324;Srrm2   | S1278 | 1           | 5             | ELSHSPPRENSFESLEFK  | EL(S)HS(0.968)PPR       | ELSHS(ph)PPRENSFES    | CDK2       | 1.1                       | 0.39492      |            | Yes                    |
| 910  | IPI00785240 | Serine/arginine repetit  | Srrm2;Kiaa0324;Srrm2   | S1305 | 1           | 13            | NSGPVSEVNTGFSPEVK   | NSGPVSEVNTGFS(1)PEV     | NSGPVSEVNTGFS(ph)PEV  |            | 1.1                       | 0.44365      |            | Yes                    |
| 1216 | IPI00785240 | Serine/arginine repetit  | Srrm2;Kiaa0324;Srrm2   | S1338 | 1           | 2             | RSSSELSPEVVEK       | RS(0.328)S(0.328)S(0.3  | RS(ph)SSELSPEVVEK     | PKA        |                           |              |            | No                     |
| 253  | IPI00785240 | Serine/arginine repetit  | Srrm2;Kiaa0324;Srrm2   | S1339 | 1           | 3             | RSSSELSPEVVEK       | RS(0.06)S(0.935)S(0.00  | RS(ph)SSELSPEVVEK     | PKA        | 1.4                       | 0.096684     |            | Yes                    |
| 1220 | IPI00785240 | Serine/arginine repetit  | Srrm2;Kiaa0324;Srrm2   | S1340 | 1           | 4             | RSSSELSPEVVEK       | RS(0.328)S(0.328)S(0.3  | RS(ph)SSELSPEVVEK     | CAMK2      |                           |              |            | No                     |
| 925  | IPI00785240 | Serine/arginine repetit  | Srrm2;Kiaa0324;Srrm2   | S1359 | 1           | 2             | VSSPVLETVQQR        | VS(0.5)S(0.5)PVLETVQQR  | VS(ph)SPVLETVQQR      | CK1        | 1.1                       | 0.44754      |            | No                     |
| 907  | IPI00785240 | Serine/arginine repetit  | Srrm2;Kiaa0324;Srrm2   | S1360 | 1           | 3             | VSSPVLETVQQR        | VS(0.003)S(0.997)PVLE   | VSSS(ph)PVLETVQQR     | ERK/MAPK   | 1.1                       | 0.44284      |            | Yes                    |
| 45   | IPI00785240 | Serine/arginine repetit  | Srrm2;Kiaa0324;Srrm2   | S2224 | 1           | 1             | TPAAAAAMNLASPR      | TPAAAAAMNLAS(1)PR       | TPAAAAAMNLAS(ph)      | CDK1       | 2.8                       | 1.712E-08    | Up         | Yes                    |

| No   | IPI Numbers | Protein Names           | Gene Names            | pAA   | Number of P | Position in p | Peptide Sequence     | Phospho (STY) Probabi                | Modified Sequence                | Best Motif     | Ratio <sup>1</sup> of Phd | Ratio Signif | Up-/Down-r | Localized phosphosite? |
|------|-------------|-------------------------|-----------------------|-------|-------------|---------------|----------------------|--------------------------------------|----------------------------------|----------------|---------------------------|--------------|------------|------------------------|
| 1232 | IPI00785240 | Serine/arginine repetit | Srrm2;Kiaa0324;Srrm2  | S2347 | 1           | 2             | VSGRTSPLMLDR         | V(0.47)GRT(0.47)S(0.0)               | VS(ph)GRTSPLM(ox)LL              | PKA            |                           |              | No         |                        |
| 542  | IPI00785240 | Serine/arginine repetit | Srrm2;Kiaa0324;Srrm2  | S2351 | 1           | 6             | VSGRTSPLMLDR         | VSGRT(0.007)S(0.993)P                | VSGRTS(ph)PLMLDR                 | PKA            | 1.2                       | 0.27231      | Yes        |                        |
| 738  | IPI00785240 | Serine/arginine repetit | Srrm2;Kiaa0324;Srrm2  | S2360 | 1           | 1             | SRTPPSAPSQSR         | S(0.504)RT(0.407)PPS(0.0)            | S(ph)RTPPSAPSQSR                 | CHK1/2         | 1.2                       | 0.36684      | Yes        |                        |
| 1228 | IPI00785240 | Serine/arginine repetit | Srrm2;Kiaa0324;Srrm2  | S2368 | 1           | 9             | SRTPPSAPSQSR         | S(0.099)RT(0.43)PPS(0.0)             | SRT(ph)PPSAPSQSR                 | CK1            |                           |              | No         |                        |
| 298  | IPI00785240 | Serine/arginine repetit | Srrm2;Kiaa0324;Srrm2  | S2404 | 1           | 19            | MVQASSQLLPPAQDRP     | MVQASSQLLPPAQDRP                     | M(ox)VQASSQLLPPA                 | IWW GroupIV    | 1.3                       | 0.12562      | Yes        |                        |
| 1199 | IPI00785240 | Serine/arginine repetit | Srrm2;Kiaa0324;Srrm2  | S2408 | 1           | 23            | MVQASSQLLPPAQDRP     | MVQASSQLLPPAQDRP                     | M(ox)VQASSQLLPPA                 | CK1            |                           |              | No         |                        |
| 1205 | IPI00785240 | Serine/arginine repetit | Srrm2;Kiaa0324;Srrm2  | S2411 | 1           | 26            | MVQASSQLLPPAQDRP     | MVQAS(0.1)S(0.129)QS                 | MVQASSQLLPPAQDR                  | CK1            |                           |              | No         |                        |
| 1211 | IPI00785240 | Serine/arginine repetit | Srrm2;Kiaa0324;Srrm2  | S2414 | 1           | 29            | MVQASSQLLPPAQDRP     | MVQAS(0.1)S(0.129)QS                 | MVQASSQLLPPAQDR                  | CK1            |                           |              | No         |                        |
| 422  | IPI00785240 | Serine/arginine repetit | Srrm2;Kiaa0324;Srrm2  | S2656 | 1           | 4             | RQPSQPSPR            | RQPS(0.999)PQPS(0.00)                | (ca)RQPS(ph)PQPSR                | CAMK2          | 1.2                       | 0.22181      | Yes        |                        |
| 391  | IPI00785240 | Serine/arginine repetit | Srrm2;Kiaa0324;Srrm2  | S2660 | 1           | 8             | RQPSQPSPR            | RQPS(0.5)PQPS(0.5)PR                 | RQPS(ph)PQPSR                    | CDK1           | 1.3                       | 0.19948      | No         |                        |
| 658  | IPI00785240 | Serine/arginine repetit | Srrm2;Kiaa0324;Srrm2  | T1153 | 1           | 6             | DKFSPTQDRPESSTVLK    | DKFS(0.009)PT(0.991)C                | DKFSPT(ph)QDRPESSTVLK            |                | 1.2                       | 0.33004      | Yes        |                        |
| 198  | IPI00785240 | Serine/arginine repetit | Srrm2;Kiaa0324;Srrm2  | T2077 | 1           | 7             | PSMSPTPLDR           | PSMS(0.003)PT(0.997)H                | PSMSPT(ph)PLDR                   | FHA1 Rad53p    | 1.4                       | 0.054801     | Yes        |                        |
| 584  | IPI00785240 | Serine/arginine repetit | Srrm2;Kiaa0324;Srrm2  | T2362 | 1           | 3             | SRTPPSAPSQSR         | S(0.12)RT(0.87)PPS(0.0)              | SRT(ph)PPSAPSQSR                 | 14-3-3 binding | 1.2                       | 0.29158      | Yes        |                        |
| 339  | IPI00785240 | Serine/arginine repetit | Srrm2;Kiaa0324;Srrm2  | S778  | 1           | 6             | SLSGSSPCPK           | SLSGS(0.107)S(0.893)P                | SLSGSS(ph)PCPK                   | Polo box       | 1.3                       | 0.1616       | Yes        |                        |
| 569  | IPI00830670 | Sperm-specific antigen  | Sfsa2;Kiaa1927;Krap;S | S90   | 1           | 6             | TPLGASLDEQSSGTPK     | T(0.008)PLGAS(0.977)L                | TPLGAS(ph)LDEQSSG                | CK2            | 1.0                       | 0.28537      | Yes        |                        |
| 554  | IPI00407571 | FACT complex subunit    | Ssrp1;Ssrp1;Ssrp1;RP2 | S444  | 1           | 13            | EGINPGYDDYADSDDEQ    | EGINPGYDDY(0.032)AD                  | EGINPGYDDYADSD                   | DEQHDAYLER     | 1.2                       | 0.27863      | Yes        |                        |
| 1186 | IPI00407571 | FACT complex subunit    | Ssrp1;Ssrp1;Ssrp1;RP2 | Y438  | 1           | 7             | EGINPGYDDYADSDDEQ    | EGINPGY(0.323)DDY(0.0)               | EGINPGY(ph)DDYADSD               | EGFR           |                           |              | No         |                        |
| 1189 | IPI00407571 | FACT complex subunit    | Ssrp1;Ssrp1;Ssrp1;RP2 | Y441  | 1           | 10            | EGINPGYDDYADSDDEQ    | EGINPGY(0.179)DDY(0.0)               | (ca)EGINPGYDDY(ph)ADSDDEQHDAYLER |                |                           |              | No         |                        |
| 343  | IPI00312188 | AMSH-like protease;AN   | Stambpl1;Amshp;Stam   | S242  | 1           | 10            | SDGSNFANYSPVNR       | SDGSNFANY(0.001)S(0.0)               | SDGSNFANYS(ph)PPVNR              |                | 0.9                       | 0.16407      | Yes        |                        |
| 1130 | IPI00153216 | Signal-transducing ada  | Stap2;Stap2           | S19   | 1           | 7             | LKGAPSHYYESFLEKK     | LKGAPPS(0.329)HY(0.3)                | (ca)LKGAPPS(ph)HYYESFLEKK        |                |                           |              | No         |                        |
| 1134 | IPI00153216 | Signal-transducing ada  | Stap2;Stap2           | Y21   | 1           | 9             | LKGAPSHYYESFLEKK     | LKGAPPS(0.329)HY(0.3)                | (ca)LKGAPPS(ph)HYYESFLEKK        |                |                           |              | No         |                        |
| 553  | IPI00153216 | Signal-transducing ada  | Stap2;Stap2           | Y22   | 1           | 10            | LKGAPSHYYESFLEKK     | LKGAPPS(0.117)HY(0.1)                | (ca)LKGAPSHYHY(ph)ESFLEKK        |                | 1.0                       | 0.27857      | Yes        |                        |
| 1118 | IPI00114979 | Signal transducer and a | Stat5a;Mgf;Mpf        | Y694  | 1           | 5             | AVDGYVKPQIK          | AVDGY(1)VKPQIK                       | AVDGY(ph)VKPQIK                  | EGFR           |                           |              | Yes        |                        |
| 1122 | IPI00114982 | Signal transducer and a | Stat5b                | Y699  | 1           | 5             | AADGYVKPQIK          | AADGY(1)VKPQIK                       | AADGY(ph)VKPQIK                  | EGFR           |                           |              | Yes        |                        |
| 81   | IPI00831595 | Serine/threonine kinas  | Stk10;Stk10;Lok       | T950  | 1           | 11            | LSEEAERPTTPSK        | LSEEAERPTT(0.008)T(0.0)              | LSEEAERPTT(ph)PSK                | IWW GroupIV    | 2.0                       | 0.000348     | Up         | Yes                    |
| 848  | IPI00474228 | Serine/threonine-prote  | Stk3;Mess1;Mst2;Stk3  | S316  | 1           | 15            | HEEQRELEEEEEENSD     | HEEQRELEEEEEENS(0.9)                 | HEEQRELEEEEEENS(ph)DEDELDSHTMVK  |                | 1.1                       | 0.41318      | Yes        |                        |
| 1277 | IPI00474228 | Serine/threonine-prote  | Stk3;Mess1;Mst2;Stk3  | S323  | 1           | 22            | HEEQRELEEEEEENSD     | HEEQRELEEEEEENS(0.4)                 | HEEQRELEEEEEENS(ph)DEDELDSHTMVK  |                |                           |              | No         |                        |
| 1283 | IPI00474228 | Serine/threonine-prote  | Stk3;Mess1;Mst2;Stk3  | T325  | 1           | 18            | ELEEEEEENSDDELDSHT   | ELEEEEEENS(0.249)DEDE                | ELEEEEEENSDDELDS(ph)HTM(ox)VK    |                |                           |              | No         |                        |
| 24   | IPI00551236 | Stathmin;Phosphoprot    | Stmn1;Lag;Lap18;Pr22  | S25   | 1           | 11            | ASGOAFELILSPR        | ASGOAFELILS(1)PR                     | ASGOAFELILS(ph)PR                | CDK1           | 7.6                       | 4.22E-29     | Up         | Yes                    |
| 840  | IPI00352986 | Striatin                | Strn                  | S245  | 1           | 10            | FLESAAADFSDEDEDED    | FLESAAADFS(1)DEDEDE                  | FLESAAADFS(ph)DEDEDEDTDR         |                | 1.0                       | 0.40947      | Yes        |                        |
| 428  | IPI00316469 | Dolichyl-diphosphoolig  | Stt3b;Simp            | S495  | 1           | 8             | ENPPVEDSDEDDKRNPI    | ENPPVEDS(0.842)S(0.1)                | ENPPVEDS(ph)SDEDD                | CK2            | 1.2                       | 0.22434      | Yes        |                        |
| 1357 | IPI00316469 | Dolichyl-diphosphoolig  | Stt3b;Simp            | Y508  | 1           | 21            | ENPPVEDSDEDDKRNPI    | ENPPVEDS(0.339)S(0.3)                | ENPPVEDS(ph)SDEDD                | EGFR           |                           |              | Yes        |                        |
| 1079 | IPI00471361 | STIP1 homology and U    | Stub1;Chip            | S20   | 1           | 8             | LGTGGGSPDKSQAQ       | LGT(0.498)GGGGS(0.49)                | LGT(ph)GGGSPDKSP                 | CDK2           |                           |              | No         |                        |
| 1081 | IPI00471361 | STIP1 homology and U    | Stub1;Chip            | S24   | 1           | 12            | LGTGGGSPDKSQAQ       | LGT(0.138)GGGGS(0.40)                | LGTGGGGS(ph)PKSP                 | CK1            |                           |              | No         |                        |
| 1086 | IPI00471361 | STIP1 homology and U    | Stub1;Chip            | T15   | 1           | 3             | LGTGGGSPDKSQAQ       | LGT(0.498)GGGGS(0.49)                | LGT(ph)GGGSPDKSP                 | CAMK2          |                           |              | No         |                        |
| 417  | IPI00454050 | Transcription elongatio | Supt6h;Kiaa0162       | S125  | 1           | 3             | KMSDDDEDEEYEGKEE     | KMS(1)DDEDEEYEGY                     | KMS(ph)DDEDEEYEGKEHEK            |                | 1.3                       | 0.21652      | Yes        |                        |
| 212  | IPI00918245 | Putative uncharacterize | Svil                  | S260  | 1           | 5             | ARYPSGEIPVVEDEEKVI   | ARYP(0.013)PS(0.939)GS               | ARYPS(ph)GSEIPVVED               | PKA/AKT        | 1.4                       | 0.062399     | Yes        |                        |
| 984  | IPI00918245 | Putative uncharacterize | Svil;Svil;Svil        | S556  | 1           | 3             | RGSLGPNNSAAHLGDS     | RGSL(1)LELGNPSAAHLG                  | RGSL(ph)LELGNPSAAH               | AURORA-A       | 1.0                       | 0.4687       | Yes        |                        |
| 141  | IPI00918245 | Putative uncharacterize | Svil;Svil;Svil        | T407  | 1           | 3             | YQTQPVTLGEVEQVQSG    | Y(0.11)QT(0.89)QPVTLC                | YQT(ph)QPVTLGEVEQ                | CAMK2          | 0.8                       | 0.015004     | Down       | Yes                    |
| 123  | IPI00918245 | Putative uncharacterize | Svil;Svil;Svil        | Y405  | 1           | 1             | YQTQPVTLGEVEQVQSG    | Y(0.61)QT(0.39)QPVTLC                | Y(ph)QPVTLGEVEQVQSGK             |                | 0.7                       | 0.0070677    | Down       | No                     |
| 349  | IPI00317599 | Synapse-associated pro  | Syap1                 | T255  | 1           | 7             | DDNLPLTEAVRPKTPPV    | DDNLPLT(0.643)EAVRP                  | DDNLPLT(ph)EAVRPK                | NEK6           | 0.9                       | 0.16703      | No         |                        |
| 837  | IPI00317599 | Synapse-associated pro  | Syap1                 | T262  | 1           | 14            | DDNLPLTEAVRPKTPPV    | DDNLPLT(0.003)EAVRP                  | DDNLPLTEAVRPKTPPV                | IWW GroupIV    | 1.0                       | 0.40872      | Yes        |                        |
| 526  | IPI00856427 | Symplekin               | Sympk                 | S1260 | 1           | 4             | DESPQNLSHAAVEEALK    | DESP(0.097)QNLS(0.0)                 | DESP(ph)QNLSHAAVEEALK            |                | 1.0                       | 0.26711      | Yes        |                        |
| 603  | IPI00469184 | Synemin;Desmuslin;Syn   | Synn;Dmn;Kiaa0353;S   | S780  | 1           | 18            | IDFSTPFQVEEVDVSP     | IDFSTPFQVEEVDV(0.0)                  | IDFSTPFQVEEVDVSP                 | CDK1           | 1.0                       | 0.30319      | Yes        |                        |
| 1110 | IPI00662157 | Synaptopodin            | Synpo;Kiaa1029        | S116  | 1           | 8             | KVMTASGSSSPVPR       | KVMTAS(0.003)GS(0.3)                 | KVMTASGS(ph)SSPVP                | CK1            |                           |              | No         |                        |
| 1113 | IPI00662157 | Synaptopodin            | Synpo;Kiaa1029        | S117  | 1           | 9             | KVMTASGSSSPVPR       | KVMTAS(0.003)GS(0.3)                 | KVMTASGS(ph)SSPVP                | CK1            |                           |              | No         |                        |
| 1119 | IPI00662157 | Synaptopodin            | Synpo;Kiaa1029        | S118  | 1           | 10            | KVMTASGSSSPVPR       | KVMTAS(0.003)GS(0.3)                 | KVMTASGS(ph)SSPVP                | Polo box       |                           |              | No         |                        |
| 729  | IPI00662157 | Synaptopodin            | Synpo;Kiaa1029        | S132  | 1           | 1             | STSFTEIDLK           | S(0.939)T(0.03)S(0.03)P              | S(ph)TSFTEIDLK                   | NEK6           | 1.0                       | 0.36113      | Yes        |                        |
| 630  | IPI00662157 | Synaptopodin            | Synpo;Kiaa1029        | S134  | 1           | 3             | STSFTEIDLK           | S(0.009)T(0.004)S(0.98)              | STS(ph)TFTEIDLK                  | PKA/AKT        | 1.0                       | 0.31631      | Yes        |                        |
| 931  | IPI00662157 | Synaptopodin;Synapto    | Synpo;Kiaa1029;Synpo  | S1002 | 1           | 3             | MRSQPASPAR           | MRS(1)QPASPAR                        | MRS(ph)QPASPAR                   | CAMK2          | 1.1                       | 0.49934      | Yes        |                        |
| 263  | IPI00662157 | Synaptopodin;Synapto    | Synpo;Kiaa1029;Synpo  | S1091 | 1           | 3             | RGSLPTEASCTT         | RGSL(1)LPTEASCTT                     | RGSL(ph)LPTEASCTT                | AURORA-A       | 1.4                       | 0.10136      | Yes        |                        |
| 756  | IPI00662157 | Synaptopodin;Synapto    | Synpo;Kiaa1029;Synpo  | S567  | 1           | 3             | VRSPSYSTLYPSSDPKPS   | VRSPSYSTLYPSSDPKPS(0.867)PPS(0.051)Y | VRSPSYSTLYPSSDPKPS               | ERK/MAPK       | 1.2                       | 0.37419      | Yes        |                        |
| 9    | IPI00662157 | Synaptopodin;Synapto    | Synpo;Kiaa1029;Synpo  | S583  | 1           | 19            | VRSPSYSTLYPSSDPKPS   | VRSPSYSTLYPSSDPKPS(0.021)Y           | VRSPSYSTLYPSSDPKPS(ph)HLK        |                | 0.1                       | 2.894E-59    | Down       | Yes                    |
| 573  | IPI00662157 | Synaptopodin;Synapto    | Synpo;Kiaa1029;Synpo  | S672  | 1           | 4             | DRASPAEAEEAVPEWAS    | DRAS(1)PAEAEEAVPEW                   | DRAS(ph)PAEAEEAVPEW              | PKA            | 1.0                       | 0.2872       | Yes        |                        |
| 786  | IPI00662157 | Synaptopodin;Synapto    | Synpo;Kiaa1029;Synpo  | S833  | 1           | 3             | AASPAKPSLIDLVPNLR    | AAS(0.999)PAKPSLIDLVP                | AAS(ph)PAKPSLIDLVP               | CDK2           | 1.0                       | 0.38557      | Yes        |                        |
| 1060 | IPI00662157 | Synaptopodin;Synapto    | Synpo;Kiaa1029;Synpo  | S838  | 1           | 8             | AASPAKPSLIDLVPNLR    | AAS(0.179)PAKPS(0.41)                | (ca)AASPAKPS(ph)SLDLVPLNLR       |                |                           |              | No         |                        |
| 1062 | IPI00662157 | Synaptopodin;Synapto    | Synpo;Kiaa1029;Synpo  | S839  | 1           | 9             | AASPAKPSLIDLVPNLR    | AAS(0.179)PAKPS(0.41)                | (ca)AASPAKPS(ph)SLDLVPLNLR       |                |                           |              | No         |                        |
| 416  | IPI00139383 | TBC1 domain family me   | Tbc1d10a;Epi64;Tbc1d  | S441  | 1           | 16            | AILDAEPGRPALQPS      | AILDAEPGRPALQPS(0.0)                 | AILDAEPGRPALQPS(ph)NEK6          |                | 1.0                       | 0.21614      | Yes        |                        |
| 631  | IPI00139383 | TBC1 domain family me   | Tbc1d10a;Epi64;Tbc1d  | S443  | 1           | 18            | AILDAEPGRPALQPS      | AILDAEPGRPALQPS(0.0)                 | AILDAEPGRPALQPS(ph)IR            |                | 1.0                       | 0.31634      | Yes        |                        |
| 211  | IPI00469012 | TBC1 domain family me   | Tbc1d10b              | S22   | 1           | 8             | HGAPAAPSPPPR         | HGAPAAPSP(1)PPPR                     | HGAPAAPSP(ph)PPPR                |                | 1.0                       | 0.062341     | Yes        |                        |
| 469  | IPI00110247 | TBC1 domain family me   | Tbc1d15               | S201  | 1           | 1             | SLSQSFENLDEPAGYLIC   | S(0.964)LS(0.018)QS(0.0)             | S(ph)LSQSFENLDEPAG               | GSK3           | 0.8                       | 0.24324      | Yes        |                        |
| 788  | IPI00453842 | TBC1 domain family me   | Tbc1d2b;Kiaa1055      | S959  | 1           | 11            | DTPSPDKGELVSDDEEDT   | DTPSPDKGELVS(1)DEEEDT                | DTPSPDKGELVS(ph)DEE              | CK2            | 1.0                       | 0.3859       | Yes        |                        |
| 1074 | IPI00453842 | TBC1 domain family me   | Tbc1d2b;Kiaa1055      | T965  | 1           | 19            | ERDTPSPDKGELVSDDEEDT | ERDTPSPDKGELVS(0.5)D                 | ERDTPSPDKGELVS(ph)DEEEDT         |                |                           |              | No         |                        |
| 1098 | IPI00930819 | Transcription elongatio | Tcea1;Tceat;Tcea1;Tce | S107  | 1           | 7             | KKEPAISSQNSPEAR      | KKEPAIS(0.333)S(0.333)               | KKEPAIS(ph)SQNSPEAR              |                |                           |              | No         |                        |
| 1101 | IPI00930819 | Transcription elongatio | Tcea1;Tceat;Tcea1;Tce | S108  | 1           | 8             | KKEPAISSQNSPEAR      | KKEPAIS(0.333)S(0.333)               | KKEPAIS(ph)SQNSPEAR              |                |                           |              | No         |                        |
| 901  | IPI00930819 | Transcription elongatio | Tcea1;Tceat;Tcea1;Tce | S111  | 1           | 11            | KKEPAISSQNSPEAR      | KKEPAISS(0.001)QNS(0.0)              | KKEPAISSQNS(ph)PEA               | CK1            | 1.1                       | 0.44047      | Yes        |                        |

| No   | IPI Numbers | Protein Names                | Gene Names              | pAA   | Number of P | Position in p | Peptide Sequence   | Phospho (STY) Probabi      | Modified Sequence        | Best Motif         | Ratio <sup>1</sup> of Phd | Ratio Signifid | Up-/Down-r | Localized phosphosite? |
|------|-------------|------------------------------|-------------------------|-------|-------------|---------------|--------------------|----------------------------|--------------------------|--------------------|---------------------------|----------------|------------|------------------------|
| 625  | IPI00848939 | Tensin-like C1 domain        | Tenc1;Tns2;Tenc1;Tns2   | S1094 | 1           | 10            | HLPGSGQQPSPPAR     | HLPGS(0.002)GQQPS(0.002)   | HLPGSGQQPS(ph)PPAR       |                    | 1.0                       | 0.31395        |            | Yes                    |
| 862  | IPI00112101 | Tuftelin-interacting protein | Ttip11;Stip;Tip39       | S211  | 1           | 13            | TTQSLQDFPVADSEEEAE | TTQSLQDFPVADSI(1)EEAE      | TTQSLQDFPVADSI(ph)CK2    |                    | 1.1                       | 0.42146        |            | Yes                    |
| 674  | IPI00124572 | Trans-Golgi network in       | Tgoln2;Tgn2             | S277  | 1           | 6             | VSGPSSSENQEGTLTDSN | VSGPS(0.003)S(0.899)S      | VSGPSS(ph)SENQEGTLCK1    |                    | 1.0                       | 0.34121        |            | Yes                    |
| 1167 | IPI00124572 | Trans-Golgi network in       | Tgoln2;Tgn2             | S278  | 1           | 7             | VSGPSSSENQEGTLTDSN | VS(0.1)GPS(0.1)S(0.35)     | VSGPSS(ph)ENQEGTLTDSMK   |                    |                           |                |            | No                     |
| 1173 | IPI00124572 | Trans-Golgi network in       | Tgoln2;Tgn2             | S288  | 1           | 17            | VSGPSSSENQEGTLTDSN | VS(0.11)GPS(0.11)S(0.1)    | VSGPSSSENQEGTLTDSNEK6    |                    |                           |                |            | No                     |
| 332  | IPI00664886 | THO complex 2;Putativ        | Thoc2;RP23-300D2.1-0    | S1419 | 1           | 9             | KIDSHPSHSSTVK      | KIDS(0.005)HPS(0.024)      | KIDSHPS(ph)HSSTVK        |                    | 1.3                       | 0.15408        |            | Yes                    |
| 1042 | IPI00664886 | THO complex 2;Putativ        | Thoc2;RP23-300D2.1-0    | T1423 | 1           | 13            | KIDSHPSHSSTVK      | KIDSHPS(0.028)PIS(0.02)    | KIDSHPSHSST(ph)VF        | FHA1 Rad53p        | 1.1                       | 0.49272        |            | Yes                    |
| 926  | IPI00556768 | Thyroid hormone rece         | Thrap3;Trap150;Thrap    | S243  | 1           | 7             | ASVSDLSR           | ASVSDLS(1)PR               | ASVSDLS(ph)PR            | CDK1               | 1.1                       | 0.44755        |            | Yes                    |
| 732  | IPI00556768 | Thyroid hormone rece         | Thrap3;Trap150;Thrap    | S679  | 1           | 5             | RIDISPSTFR         | RIDIS(1)PSTFR              | (ca)RIDIS(ph)PSTFR       |                    | 1.2                       | 0.36256        |            | Yes                    |
| 1093 | IPI00556768 | Thyroid hormone rece         | Thrap3;Trap150;Thrap    | S681  | 1           | 7             | RIDISPSTFR         | RIDIS(0.496)PS(0.496)T     | RIDIS(ph)PSTFR           |                    |                           |                |            | No                     |
| 275  | IPI00556768 | Thyroid hormone rece         | Thrap3;Trap150;Thrap    | T682  | 1           | 8             | RIDISPSTFRK        | RIDIS(0.208)PS(0.021)T     | RIDISPST(ph)FRK          | CK1                | 1.4                       | 0.10778        |            | Yes                    |
| 794  | IPI00323349 | Tight junction protein 2     | Tjp2;Zo2                | S107  | 1           | 10            | KVQVAPLQGSPPPLSHDD | KVQVAPLQGS(0.999)PS        | KVQVAPLQGS(ph)PPL        | NEK6               | 1.0                       | 0.38894        |            | Yes                    |
| 620  | IPI00323349 | Tight junction protein 2     | Tjp2;Zo2                | S1136 | 1           | 5             | GSYSDPEEEYR        | GS(0.009)Y(0.009)GS(0.009) | GSYSDPEEEYR              | CK2                | 1.0                       | 0.3107         |            | Yes                    |
| 315  | IPI00323349 | Tight junction protein 2     | Tjp2;Zo2                | Y238  | 1           | 14            | SYHEAYEPDYGGYSPY   | SYHEAYEPDY(0.015)GG        | SYHEAYEPDYGGY(ph)SPSYDRR |                    | 1.3                       | 0.14053        |            | Yes                    |
| 439  | IPI00845563 | MKIAA1547 protein;Pu         | Tle3;mkIAA1547;Tle3     | S286  | 1           | 5             | DAPTSVASVSSSPSSK   | DAPT(0.014)S(0.986)PA      | DAPTS(ph)PASVASSSS       | WW GroupIV         | 1.2                       | 0.22976        |            | Yes                    |
| 752  | IPI00229647 | Tln2 protein;Tln2 prote      | Tln2;Tln2;Tln2;mkIAA0   | T1844 | 1           | 5             | LDEGTTPPEK         | LDEGT(1)PPEK               | LDEGT(ph)PPEK            | CK2                | 1.2                       | 0.37252        |            | Yes                    |
| 579  | IPI00828976 | Putative uncharacterize      | Tmpo;Tmpo;Tmpo;Lap      | S157  | 1           | 1             | SSTPLTVSSSAENR     | S(0.528)S(0.236)T(0.23)    | S(ph)STPLTVSSSAEN        | CK1                | 1.2                       | 0.28977        |            | No                     |
| 1057 | IPI00828976 | Putative uncharacterize      | Tmpo;Tmpo;Tmpo;Lap      | S158  | 2           | 11            | LREQGTERSSRSTPLPTV | LREQGT(0.238)ES(0.23)      | LREQGTERSSR(ph)S(ph)     | PKA                |                           |                |            | No                     |
| 193  | IPI00828976 | Putative uncharacterize      | Tmpo;Tmpo;Tmpo;Lap      | S165  | 2           | 9             | SSTPLTVSSSAENR     | S(0.379)S(0.308)T(0.30)    | S(ph)STPLTVSSSAENR       |                    | 1.5                       | 0.051085       |            | Yes                    |
| 624  | IPI00828976 | Putative uncharacterize      | Tmpo;Tmpo;Tmpo;Lap      | T159  | 1           | 3             | SSTPLTVSSSAENR     | S(0.079)S(0.03)T(0.891)    | SST(ph)PLTVSSSAEN        | Polo box           | 1.2                       | 0.31291        |            | Yes                    |
| 1058 | IPI00828976 | Putative uncharacterize      | Tmpo;Tmpo;Tmpo;mc       | S66   | 1           | 6             | GPPDFSSDEEREPTVPLG | GPPDFS(0.493)S(0.493)      | GPPDFS(ph)SDEEREPT       | CK2                |                           |                |            | No                     |
| 1059 | IPI00828976 | Putative uncharacterize      | Tmpo;Tmpo;Tmpo;mc       | S67   | 1           | 7             | GPPDFSSDEEREPTVPLG | GPPDFS(0.493)S(0.493)      | GPPDFS(ph)SDEEREPT       | CK2                |                           |                |            | No                     |
| 314  | IPI00828976 | Putative uncharacterize      | Tmpo;Tmpo;Tmpo;mc       | T74   | 1           | 14            | GPPDFSSDEEREPTVPLG | GPPDFSDEEREPT(1)PV         | GPPDFSSDEEREPT(ph)       | CAMK2              | 1.3                       | 0.14031        |            | Yes                    |
| 1022 | IPI00121341 | Thioredoxin-related tra      | Tmx1;Txndc;Txndc1       | S245  | 1           | 14            | KVEEEQEAEDEEDVSEEA | KVEEEQEAEDEEDVSI(1)EE      | KVEEEQEAEDEEDVSI(ph)     | CK2                | 1.1                       | 0.48673        |            | Yes                    |
| 52   | IPI00459443 | 182 kDa tankyrase-1-b        | Tnks1bp1;Kiaa1741;Ta    | S1022 | 1           | 15            | DVGHLEEGASGGLLSPST | DVGHLEEGASGGLLS(0.8)       | DVGHLEEGASGGLLS(ph)      | PSTPHSR            | 2.5                       | 6.597E-07      | Up         | Yes                    |
| 583  | IPI00459443 | 182 kDa tankyrase-1-b        | Tnks1bp1;Kiaa1741;Ta    | S1290 | 1           | 9             | NMAPGAGCSPPGEP     | NMAPGAGCS(1)PGEPR          | NMAPGAGCS(ph)PGE         | CK2                | 1.0                       | 0.29152        |            | Yes                    |
| 164  | IPI00459443 | 182 kDa tankyrase-1-b        | Tnks1bp1;Kiaa1741;Ta    | S1375 | 1           | 6             | SSGSLSPGLETEDPLEAR | S(0.014)S(0.01)GS(0.08)    | SSGSLSPGLETEDPLEAR       | CK1                | 1.5                       | 0.030931       | Up         | Yes                    |
| 513  | IPI00459443 | 182 kDa tankyrase-1-b        | Tnks1bp1;Kiaa1741;Ta    | S1611 | 2           | 4             | VPSDEEVVEEPOQR     | VPS(1)S(1)DEEVVEEQS        | VPS(ph)S(ph)DEEVVEE      | CAMK2              | 1.0                       | 0.26304        |            | Yes                    |
| 514  | IPI00459443 | 182 kDa tankyrase-1-b        | Tnks1bp1;Kiaa1741;Ta    | S1612 | 2           | 3             | VPSDEEVVEEPOQR     | VPS(1)S(1)DEEVVEEQS        | VPS(ph)S(ph)DEEVVEE      | CK2                | 1.0                       | 0.26304        |            | Yes                    |
| 241  | IPI00459443 | 182 kDa tankyrase-1-b        | Tnks1bp1;Kiaa1741;Ta    | S1657 | 1           | 3             | NRSAAEEGEVTESK     | NRS(1)AEEGEVTESK           | NRS(ph)AEEGEVTESK        | PKA/AKT            | 1.4                       | 0.085639       |            | Yes                    |
| 318  | IPI00459443 | 182 kDa tankyrase-1-b        | Tnks1bp1;Kiaa1741;Ta    | S236  | 1           | 17            | SOEGTAEIPAECQEEHSI | SOEGTAEIPAECQEEHSI(1)      | SOEGTAEIPAECQEEHSI(ph)   | KTPEER             | 1.0                       | 0.14323        |            | No                     |
| 657  | IPI00459443 | 182 kDa tankyrase-1-b        | Tnks1bp1;Kiaa1741;Ta    | S300  | 1           | 11            | LANISVPASESPR      | LANISVPAS(0.909)ES(0.0)    | LANISVPASESPR            | CDK1               | 1.0                       | 0.33302        |            | Yes                    |
| 441  | IPI00459443 | 182 kDa tankyrase-1-b        | Tnks1bp1;Kiaa1741;Ta    | S527  | 1           | 5             | GEGVSQVGPPTPAPES   | GEGVS(0.518)QVGPPT         | GEGVS(ph)QVGPPTPAPES     | PR                 | 1.0                       | 0.23019        |            | No                     |
| 914  | IPI00459443 | 182 kDa tankyrase-1-b        | Tnks1bp1;Kiaa1741;Ta    | S568  | 1           | 1             | SPALLPSTVEGPPGAPLL | S(1)PALLPSTVEGPPGAP        | S(ph)PALLPSTVEGPPG       | WW GroupIV         | 1.1                       | 0.44512        |            | Yes                    |
| 319  | IPI00459443 | 182 kDa tankyrase-1-b        | Tnks1bp1;Kiaa1741;Ta    | T238  | 1           | 19            | SOEGTAEIPAECQEEHSI | SOEGTAEIPAECQEEHSI(1)      | SOEGTAEIPAECQEEHSI       | CK2                | 1.3                       | 0.14323        |            | Yes                    |
| 371  | IPI00459443 | 182 kDa tankyrase-1-b        | Tnks1bp1;Kiaa1741;Ta    | T533  | 1           | 11            | GEGVSQVGPPTPAPES   | GEGVSQVGPPT(1)PPAP         | GEGVSQVGPPT(ph)PP        | ERK/MAPK           | 0.9                       | 0.1821         |            | Yes                    |
| 449  | IPI00378438 | Putative uncharacterize      | Tns1                    | S1468 | 1           | 12            | HLGGSVVPSPSLDR     | HLGGSVVPSPSLDR(0.002)VV    | HLGGSVVPSPSPSLDR(ph)     | ERK/MAPK           | 1.0                       | 0.23373        |            | Yes                    |
| 1324 | IPI00751137 | Putative uncharacterize      | Tomm70a                 | S105  | 1           | 13            | ASPALGSGHHHDGSGDSL | AS(0.325)PALGS(0.325)      | AS(ph)PALGSGHHHDGSGDSL   | SLEMSLDR           |                           |                |            | No                     |
| 622  | IPI00751137 | Putative uncharacterize      | Tomm70a                 | S94   | 1           | 2             | ASPALGSGHHHDGSGDSL | AS(1)PALGSGHHHDGSG         | AS(ph)PALGSGHHHDGSG      | PKA                | 1.2                       | 0.31124        |            | Yes                    |
| 1322 | IPI00751137 | Putative uncharacterize      | Tomm70a                 | S99   | 1           | 7             | ASPALGSGHHHDGSGDSL | AS(0.497)PALGS(0.497)      | AS(ph)PALGSGHHHDGSGDSL   | EM(ox)SSLDR        |                           |                |            | No                     |
| 424  | IPI00109764 | DNA topoisomerase 1          | Top1;Top-1;Top1         | S114  | 1           | 8             | EKENGFSPPR         | EKENGFS(0.071)S(0.92)      | (ca)EKENGFS(ph)PPR       | Polo box           | 1.0                       | 0.2232         |            | Yes                    |
| 988  | IPI00135443 | DNA topoisomerase 2          | Top2b                   | S1363 | 1           | 6             | YTFDFSEEDDDAAAADI  | Y(0.008)T(0.007)FDFS       | YTFDFSEEDDDAAAADI        | CK2                | 1.1                       | 0.47035        |            | Yes                    |
| 1344 | IPI00135443 | DNA topoisomerase 2          | Top2b                   | S1376 | 1           | 19            | YTFDFSEEDDDAAAADI  | Y(0.214)T(0.216)FDFS       | YTFDFSEEDDDAAAADD        | (ph)NDLEELK        |                           |                |            | No                     |
| 242  | IPI00135443 | DNA topoisomerase 2          | Top2b                   | S1387 | 1           | 4             | VKASPIITNDGDEFPVSD | VKAS(0.977)PIT(0.023)I     | VKAS(ph)PITNDGDEFPVSD    | GLDKDEYAFSSGK      | 1.4                       | 0.086086       |            | Yes                    |
| 425  | IPI00135443 | DNA topoisomerase 2          | Top2b                   | S1509 | 2           | 7             | IVETINSDSDFEFGIPK  | IVETINS(1)DS(0.996)DS      | IVETINS(ph)DS(ph)DS      | GSK3               | 1.2                       | 0.22335        |            | Yes                    |
| 426  | IPI00135443 | DNA topoisomerase 2          | Top2b                   | S1511 | 2           | 9             | IVETINSDSDFEFGIPK  | IVETINS(1)DS(0.996)DS      | IVETINS(ph)DS(ph)DS      | CK2                | 1.2                       | 0.22335        |            | Yes                    |
| 92   | IPI00135443 | DNA topoisomerase 2          | Top2b                   | S1537 | 1           | 3             | KASGSENEGDNYPGR    | KAS(0.923)GS(0.077)EN      | KAS(ph)GSENEGDNYP        | PKA                | 1.9                       | 0.0007518      | Up         | Yes                    |
| 1340 | IPI00135443 | DNA topoisomerase 2          | Top2b                   | S1563 | 1           | 3             | KTSFDQDSDVDFPDSFT  | KT(0.481)S(0.481)FDQ       | KT(ph)SFDQDSDVDFPDSFT    | SEPPALPR           |                           |                |            | No                     |
| 536  | IPI00135443 | DNA topoisomerase 2          | Top2b                   | S1568 | 1           | 8             | KTSFDQDSDVDFPDSFT  | KT(0.013)S(0.013)FDQ       | KTSFDQDSDVDFPDSFT        | SEPPALPR           | 1.0                       | 0.27037        |            | Yes                    |
| 420  | IPI00135443 | DNA topoisomerase 2          | Top2b                   | T1390 | 1           | 7             | VKASPIITNDGDEFPVSD | VKAS(0.5)PIT(0.5)INDGE     | VKAS(ph)PITNDGDEFE       | CK1                | 1.2                       | 0.21899        |            | No                     |
| 642  | IPI00135443 | DNA topoisomerase 2          | Top2b                   | T1562 | 1           | 1             | TSFDQDSDVDFPDSFTS  | T(0.52)S(0.406)FDQDS       | T(ph)SFDQDSDVDFPDS       | FHA1 Rad53p        | 1.2                       | 0.32426        |            | No                     |
| 1037 | IPI00135443 | DNA topoisomerase 2          | Top2b                   | Y1358 | 1           | 1             | YTFDFSEEDDDAAAADI  | Y(0.594)T(0.371)FDFS       | Y(ph)TFDFSEEDDDAAAADD    | NDLEELK            | 1.1                       | 0.49057        |            | No                     |
| 1011 | IPI00762273 | Lamina-associated poly       | Tor1aip1;Lap1B;Tor1ai   | S94   | 1           | 5             | FRPASAGEEVR        | FRPAS(1)AGEEVR             | FRPAS(ph)AGEEVR          | CAMK2              | 1.1                       | 0.48123        |            | Yes                    |
| 260  | IPI00755183 | Tumor protein D52-like       | Tpd52l2;RP23-33L3.2-0   | S189  | 1           | 7             | NSATFKSFEDR        | NSATFKS(1)FEDR             | NSATFKS(ph)FEDR          | FHA KAPP           | 0.9                       | 0.10071        |            | Yes                    |
| 1315 | IPI00755183 | Tumor protein D52-like       | Tpd52l2;RP23-33L3.2-0   | T186  | 1           | 4             | NSATFKSFEDR        | NS(0.279)AT(0.361)FKS      | (ca)NSATFKS(ph)FKS       | FEDR               |                           |                |            | No                     |
| 30   | IPI0080644  | Tpr protein;Putative un      | Tpr;Tpr;Tpr;C77892      | S2149 | 1           | 10            | TDGFAEIHSPOVAGVPI  | TDGFAEIHS(1)POVAG          | TDGFAEIHS(ph)POVAG       | PR                 | 6.3                       | 4.991E-24      | Up         | Yes                    |
| 1094 | IPI00340806 | TRAF3-interacting prot       | Traf3ip1;Mipt3          | S409  | 1           | 4             | RQESTETLVVDR       | RQES(0.924)T(0.07)ET       | RQES(ph)TETLVVDR         | PKA                |                           |                |            | Yes                    |
| 1111 | IPI00131130 | Transcription intermed       | Trim24;Tif1;Tif1a;Trim  | S806  | 1           | 4             | SEWSDASQKSPVHVGET  | S(0.025)EWS(0.325)DA       | SEWS(ph)DASQKSPVH        | CK1                |                           |                |            | No                     |
| 1114 | IPI00131130 | Transcription intermed       | Trim24;Tif1;Tif1a;Trim  | S809  | 1           | 7             | SEWSDASQKSPVHVGET  | S(0.025)EWS(0.325)DA       | SEWS(ph)DASQKSPVH        | CK1                |                           |                |            | No                     |
| 149  | IPI00131130 | Transcription intermed       | Trim24;Tif1;Tif1a;Trim  | S812  | 1           | 10            | SEWSDASQKSPVHVGET  | SEWS(0.005)DAS(0.005)      | SEWSDASQKS(ph)PVH        | CK1                | 0.8                       | 0.017897       | Down       | Yes                    |
| 1125 | IPI00312128 | Transcription intermed       | Trim28;Krip1;Tif1b;Trim | S40   | 1           | 5             | RPAASAAAAAASSP     | RPAAS(0.239)S(0.239)A      | RPAAS(ph)AAAAAASSP       | AGGGGEEAQLLEHCGVCR |                           |                |            | No                     |
| 1128 | IPI00312128 | Transcription intermed       | Trim28;Krip1;Tif1b;Trim | S41   | 1           | 6             | RPAASAAAAAASSP     | RPAAS(0.239)S(0.239)A      | RPAAS(ph)AAAAAASSP       | AGGGGEEAQLLEHCGVCR |                           |                |            | No                     |
| 1131 | IPI00312128 | Transcription intermed       | Trim28;Krip1;Tif1b;Trim | S46   | 1           | 11            | RPAASAAAAAASSP     | RPAAS(0.239)S(0.239)A      | RPAAS(ph)AAAAAASSP       | GSK3               |                           |                |            | No                     |
| 153  | IPI00312128 | Transcription intermed       | Trim28;Krip1;Tif1b;Trim | S473  | 1           | 3             | SRSGEVSGLLR        | S(0.12)RS(0.88)GEGEV       | SRS(ph)GEGEVSGLLR        | PKA                | 1.5                       | 0.024199       | Up         | Yes                    |
| 1135 | IPI00312128 | Transcription intermed       | Trim28;Krip1;Tif1b;Trim | S50   | 1           | 15            | RPAASAAAAAASSP     | RPAAS(0.001)S(0.001)A      | RPAASAAAAAASSP           | CK1                |                           |                |            | No                     |
| 872  | IPI00312128 | Transcription intermed       | Trim28;Krip1;Tif1b;Trim | S51   | 1           | 16            | RPAASAAAAAASSP     | RPAASAAAAAASS(0.0)         | RPAASAAAAAASS            | Polo box           | 1.1                       | 0.42651        |            | Yes                    |



| No   | IPI Numbers | Protein Names            | Gene Names            | pAA   | Number of | Position in p | Peptide Sequence   | Phospho (STY) Probabi   | Modified Sequence          | Best Motif       | Ratio <sup>1</sup> of Phd | Ratio Signif | Up-/Down-r | Localized phosphosite? |
|------|-------------|--------------------------|-----------------------|-------|-----------|---------------|--------------------|-------------------------|----------------------------|------------------|---------------------------|--------------|------------|------------------------|
| 237  | IPI00480235 | Tripartite motif-contain | Trim47;Trim47;Trim47  | S393  | 1         | 4             | GLGSNEDGLQK        | GLGS(1)NEDGLQK          | _GLGS(ph)NEDGLQK           |                  | 0.9                       | 0.082599     |            | Yes                    |
| 32   | IPI00828306 | Triple functional doma   | Trio;Trio;Trio        | S2575 | 2         | 7             | TRPGAVSPNSPLSTTFPS | T(0.004)RPGAVS(0.994)   | TRPGAVS(ph)PLNS(ph)GSK3    |                  | 5.0                       | 7.477E-19    | Up         | Yes                    |
| 33   | IPI00828306 | Triple functional doma   | Trio;Trio;Trio        | S2579 | 2         | 11            | TRPGAVSPNSPLSTTFPS | T(0.004)RPGAVS(0.994)   | TRPGAVS(ph)PLNS(ph)CK1     |                  | 5.0                       | 7.477E-19    | Up         | Yes                    |
| 760  | IPI00828306 | Triple functional doma   | Trio;Trio;Trio;Trio   | S1935 | 1         | 11            | KSADAGSQKDSDDSAAT  | KS(0.001)ADAGS(0.038)   | KSADAGSQKDS(ph)DDCK1       |                  | 1.0                       | 0.37546      |            | Yes                    |
| 1103 | IPI00828306 | Triple functional doma   | Trio;Trio;Trio;Trio   | S1938 | 2         | 5             | DSDDSAATPQDETIIEER | DS(0.445)DDS(0.445)AA   | DS(ph)DDSAATPQDET          | CK1              |                           |              |            | No                     |
| 1107 | IPI00828306 | Triple functional doma   | Trio;Trio;Trio;Trio   | T1946 | 2         | 13            | DSDDSAATPQDETIIEER | DS(0.445)DDS(0.445)AA   | DS(ph)DDSAATPQDET          | PLK              |                           |              |            | Yes                    |
| 429  | IPI00622738 | TRIO and F-actin-bindin  | Triobbp;Kiaa1662;Tara | S1607 | 1         | 20            | KADGPRPSLDYVELSPLA | KADGPRPSLDYVELSPLA      | KADGPRPSLDYVELSPL          | NEK6             | 1.0                       | 0.22435      |            | No                     |
| 430  | IPI00622738 | TRIO and F-actin-bindin  | Triobbp;Kiaa1662;Tara | S1608 | 1         | 21            | KADGPRPSLDYVELSPLA | KADGPRPSLDYVELSPLA      | KADGPRPSLDYVELSPL          | WW GroupIV       | 1.0                       | 0.22435      |            | No                     |
| 867  | IPI00380829 | Thyroid hormone rece     | Trip11                | S1879 | 1         | 2             | LSVHGLKPLDSPGR     | LS(0.707)VHGLKPLDS(0    | LS(ph)VHGLKPLDSPGR         | AURORA           | 1.1                       | 0.4225       |            | No                     |
| 546  | IPI00380829 | Thyroid hormone rece     | Trip11                | S1888 | 1         | 11            | LSVHGLKPLDSPGR     | LSVHGLKPLDS(1)PGR       | LSVHGLKPLDS(ph)PGR         | CDK2             | 1.2                       | 0.2745       |            | Yes                    |
| 406  | IPI00623570 | Cbp37                    | Trip12;Gtl6;cbp37     | S312  | 1         | 3             | SESPPAELPSLR       | S(0.103)ES(0.897)PPAE   | SES(ph)PPAELPSLR           | 14-3-3 binding   | 1.0                       | 0.21072      |            | Yes                    |
| 1150 | IPI00229801 | Transformation related   | Trp53bp1;RP23-43711   | S267  | 1         | 6             | SEDRPSSQVSAVAETK   | S(0.006)EDRPS(0.496)S   | SEDRPS(ph)SPQVSAVA         | PKA              |                           |              |            | No                     |
| 506  | IPI00229801 | Transformation related   | Trp53bp1;RP23-43711   | S268  | 1         | 7             | SEDRPSSQVSAVAETK   | SEDRPS(0.006)S(0.994)   | SEDRPS(ph)SPQVSAVA         | WW GroupIV       | 1.2                       | 0.25971      |            | Yes                    |
| 1155 | IPI00229801 | Transformation related   | Trp53bp1;RP23-43711   | S381  | 1         | 8             | STPFIVPSSPTEQGG    | STPFIVPS(0.333)S(0.333) | STPFIVPS(ph)SPTQGG         |                  |                           |              |            | No                     |
| 347  | IPI00229801 | Transformation related   | Trp53bp1;RP23-43711   | S382  | 1         | 9             | STPFIVPSSPTEQGG    | STPFIVPS(0.098)S(0.804) | STPFIVPS(ph)PTEQGG         | WW GroupIV       | 1.3                       | 0.16586      |            | Yes                    |
| 1012 | IPI00229801 | Transformation related   | Trp53bp1;RP23-43711   | S530  | 1         | 3             | MESLGS             | MES(0.5)LGS(0.5)PR      | M(ox)ES(ph)LGSPR           | CK1              | 1.1                       | 0.48147      |            | Yes                    |
| 495  | IPI00229801 | Transformation related   | Trp53bp1;RP23-43711   | S533  | 1         | 6             | MESLGS             | MESLGS(1)PR             | M(ox)ESLGS(ph)PR           | CDK1             | 1.0                       | 0.25454      |            | Yes                    |
| 1160 | IPI00229801 | Transformation related   | Trp53bp1;RP23-43711   | T384  | 1         | 11            | STPFIVPSSPTEQGG    | STPFIVPS(0.333)S(0.333) | STPFIVPS(ph)SPTQGG         | CK1              |                           |              |            | No                     |
| 89   | IPI00620969 | Tuberin;Tuberous scler   | Tsc2;Tsc2;Tsc2;Tsc2   | S937  | 1         | 1             | STSLNERPK          | S(0.566)T(0.283)S(0.15) | S(ph)TSLNERPK              | CAMK2            | 1.9                       | 0.006194     | Up         | No                     |
| 619  | IPI00113746 | Splicing factor U2AF 65  | U2af2;U2af65          | S79   | 1         | 12            | GAKEEHGGLIRSPR     | GAKEEHGGLIRS(1)PR       | (ca)GAKEEHGGLIRS(ph)       | CDK1             | 1.2                       | 0.30983      |            | Yes                    |
| 1099 | IPI00407835 | Ubiquitin-associated pr  | Ubap2l;Ubap2l;Ubap2l  | S633  | 1         | 8             | RYPSSISSPQKDLTQAK  | RY(0.001)PS(0.001)S(0   | RYPSSISS(ph)SPQKDLT        | CK1              |                           |              |            | No                     |
| 520  | IPI00407835 | Ubiquitin-associated pr  | Ubap2l;Ubap2l;Ubap2l  | S634  | 1         | 9             | RYPSSISSPQKDLTQAK  | RYPS(0.012)S(0.012)S(1  | RYPSSISS(ph)PQK            | Polo box         | 1.2                       | 0.26382      |            | Yes                    |
| 31   | IPI00331539 | Ubiquitin-associated ar  | Ubash3b;Sts1;Ubash3b  | S542  | 1         | 1             | SFQVTKIIESECK      | S(1)FQVTKIIESECK        | S(ph)FQVTKIIESECK          |                  | 0.2                       | 1.274E-23    | Down       | Yes                    |
| 333  | IPI00399869 | Ubiquitin-like protein 7 | Ubl7                  | S230  | 1         | 12            | DMPGGFLFDGLSDEDD   | DMPGGFLFDGLS(0.997)     | DMPGGFLFDGLS(ph)DCK2       |                  | 0.9                       | 0.15539      |            | Yes                    |
| 1104 | IPI00399869 | Ubiquitin-like protein 7 | Ubl7                  | S239  | 1         | 21            | DMPGGFLFDGLSDEDD   | DMPGGFLFDGLS(0.365)     | DMPGGFLFDGLS(ph)DDEDDHPSTR |                  |                           |              |            | No                     |
| 246  | IPI00648709 | E3 ubiquitin-protein lig | Ubr4;Kiaa0462;Zubr1   | S2743 | 1         | 6             | HVTLPSSPR          | HVTLPS(0.951)S(0.049)   | HVTLPS(ph)SPR              | GSK3             | 0.9                       | 0.092862     |            | Yes                    |
| 207  | IPI00648709 | E3 ubiquitin-protein lig | Ubr4;Kiaa0462;Zubr1   | S2744 | 1         | 7             | HVTLPSSPR          | HVTLPS(0.06)S(0.94)PR   | HVTLPS(ph)PR               | WW GroupIV       | 0.8                       | 0.060875     |            | Yes                    |
| 510  | IPI00169767 | E3 ubiquitin-protein lig | Uhrf2;Nirf            | S668  | 1         | 4             | RPASDDECPGDSK      | RPAS(1)DDECPGDSK        | RPAS(ph)DDECPGDSK          | PKA              | 1.2                       | 0.26158      |            | Yes                    |
| 812  | IPI00128071 | General vesicular trans  | Uso1;Vdp;Uso1;Vdp;Uso | S940  | 1         | 14            | LKDLGHPVEEDESDDQ   | LKDLGHPVEEDES(1)G       | LKDLGHPVEEDES(ph)GQ        | QEDDDDEIDDDGDKD  | 1.0                       | 0.39724      |            | Yes                    |
| 37   | IPI00420601 | Ubiquitin carboxyl-term  | Usp10;Ode-1;Uchpr     | S223  | 2         | 19            | TCDSQNPVDFISGVPV   | T(0.505)CDS(0.466)PQ    | T(ph)CDSQNPVDFIS           | WW GroupIV       | 3.8                       | 2.762E-13    | Up         | Yes                    |
| 316  | IPI00420601 | Ubiquitin carboxyl-term  | Usp10;Ode-1;Uchpr     | T205  | 1         | 1             | TCDSQNPVDFISGVPV   | T(0.61)CDS(0.39)PQNP    | T(ph)CDSQNPVDFIS           | FHA KAPP         | 0.9                       | 0.14117      |            | No                     |
| 508  | IPI00123410 | Ubiquitin carboxyl-term  | Usp24                 | S2044 | 1         | 6             | VSDQNSPVLPK        | VSDQNS(1)PVLPK          | VSDQNS(ph)PVLPK            | CK1              | 1.0                       | 0.26087      |            | Yes                    |
| 1333 | IPI00226889 | U3 small nucleolar RNA   | Utp15                 | S517  | 1         | 21            | NSDSPVPEHVAELPEEK  | NSDSPVPEHVAELPEEK       | NSDSPVPEHVAELPEEK(ph)      | ESPTQPSDTDKNS    |                           |              |            | No                     |
| 1336 | IPI00226889 | U3 small nucleolar RNA   | Utp15                 | S522  | 1         | 26            | NSDSPVPEHVAELPEEK  | NDS(0.001)DPVPEHVA      | NSDSPVPEHVAELPEEKTES(ph)   | PTQPSDTDKNS      |                           |              |            | No                     |
| 1339 | IPI00226889 | U3 small nucleolar RNA   | Utp15                 | S528  | 1         | 32            | NSDSPVPEHVAELPEEK  | NDS(0.001)DPVPEHVA      | NSDSPVPEHVAELPEEK          | CK1              |                           |              |            | No                     |
| 1343 | IPI00226889 | U3 small nucleolar RNA   | Utp15                 | T515  | 1         | 19            | NSDSPVPEHVAELPEEK  | NSDSPVPEHVAELPEEK       | NSDSPVPEHVAELPEEK(ph)      | ESPTQPSDTDKNS    |                           |              |            | No                     |
| 1347 | IPI00226889 | U3 small nucleolar RNA   | Utp15                 | T519  | 1         | 23            | NSDSPVPEHVAELPEEK  | NSDSPVPEHVAELPEEK       | NSDSPVPEHVAELPEEK          | FHA KAPP         |                           |              |            | No                     |
| 1350 | IPI00226889 | U3 small nucleolar RNA   | Utp15                 | T524  | 1         | 28            | NSDSPVPEHVAELPEEK  | NDS(0.001)DPVPEHVA      | NSDSPVPEHVAELPEEKTES(ph)   | PTQPSDTDKNS      |                           |              |            | No                     |
| 285  | IPI00353420 | Cytoskeletal protein     | Utrn;utrophin         | S933  | 1         | 5             | AAQASLNLALNDPIAVEQ | AAQAS(1)NLALNDPIAVE     | AAQAS(ph)NLALNDPIAVE       | EQALQEK          | 0.9                       | 0.11334      |            | Yes                    |
| 653  | IPI00118372 | Vesicle-associated men   | Vamp4;Vamp4;mCG 2     | S30   | 1         | 7             | NLLEDDSDDEEDFFLR   | NLLEDDSD(1)DEEDFFLR     | NLLEDDSD(ph)DEEDFF         | CK2              | 1.0                       | 0.33003      |            | Yes                    |
| 541  | IPI00453589 | Vesicle-associated men   | Vamp8                 | T54   | 1         | 3             | NKTEDLEATSEHF      | NKT(0.039)EDLEAT(0.9)   | NKTEDLEAT(ph)SEHF          | NEK6             | 1.0                       | 0.27197      |            | Yes                    |
| 64   | IPI00624876 | Vasodilator-stimulated   | Vasp                  | S317  | 1         | 9             | MKSSSVTTSEAHPTSP   | MKS(0.877)JS(0.053)S(0  | M(ox)KS(ph)SSSVTTSE        | CHK1/2           | 0.5                       | 1.73E-05     | Down       | Yes                    |
| 1206 | IPI00624876 | Vasodilator-stimulated   | Vasp                  | S318  | 1         | 4             | MKSSSVTTSEAHPTSP   | MKS(0.317)S(0.317)S(0   | M(ox)KS(ph)SSSVTTSE        | AHPSTPCSSDDSDLER |                           |              |            | No                     |
| 1212 | IPI00624876 | Vasodilator-stimulated   | Vasp                  | S319  | 1         | 5             | MKSSSVTTSEAHPTSP   | MKS(0.317)S(0.317)S(0   | M(ox)KS(ph)SSSVTTSE        | AHPSTPCSSDDSDLER |                           |              |            | No                     |
| 823  | IPI00126834 | Vascular cell adhesion   | Vcam1;Vcam-1;Vcam1    | S165  | 1         | 4             | QEFSSSEEMTK        | QEFSS(0.5)S(0.5)EEMTK   | QEFSS(ph)SEEMTK            | CK2              | 1.1                       | 0.40126      |            | Yes                    |
| 970  | IPI00126834 | Vascular cell adhesion   | Vcam1;Vcam-1;Vcam1    | S166  | 1         | 5             | QEFSSSEEMTK        | QEFSS(0.005)S(0.995)E   | (ca)QEFSS(ph)EEMTK         |                  | 1.1                       | 0.46401      |            | Yes                    |
| 528  | IPI00875672 | versican core protein is | Vcan                  | S2281 | 1         | 5             | MEDVSNNEVR         | MEDVS(1)NEVR            | M(ox)EDVS(ph)NEVR          |                  | 1.0                       | 0.26744      |            | Yes                    |
| 362  | IPI00405227 | Vinculin;Metavinculin    | Vcl                   | S721  | 1         | 1             | SLLDASEAIAIK       | S(0.999)LLDASEAIAIK     | S(ph)LLDASEAIAIK           |                  | 0.9                       | 0.17814      |            | Yes                    |
| 455  | IPI00122549 | Voltage-dependent ani    | Vdac1;Vdac5;Vdac1;Vd  | S117  | 1         | 8             | LTFDSSFPNTGKK      | LTFDSS(0.011)S(0.011)F  | LTFDSS(ph)PNTGKK           | CK1              | 1.2                       | 0.23545      |            | Yes                    |
| 139  | IPI00227299 | Vimentin                 | Vim                   | S419  | 1         | 9             | ISLPLPTFSSLNLR     | ISLPLPT(0.064)FS(0.872  | ISLPLPTFS(ph)LSNLR         |                  | 0.8                       | 0.014883     | Down       | Yes                    |
| 329  | IPI00227299 | Vimentin                 | Vim                   | S420  | 1         | 10            | ISLPLPTFSSLNLR     | ISLPLPT(0.001)FS(0.008  | ISLPLPTFS(ph)LSNLR         |                  | 0.9                       | 0.1495       |            | Yes                    |
| 119  | IPI00227299 | Vimentin                 | Vim                   | T417  | 1         | 7             | ISLPLPTFSSLNLR     | IS(0.036)LP(0.607)F     | ISLPLPT(ph)FSSLNLR         | FHA KAPP         | 0.7                       | 0.0047223    | Down       | No                     |
| 1243 | IPI00227299 | Vimentin;Vimentin        | Vim;Vim;RP23-185P20   | S54   | 1         | 4             | SLYSSSPGGAYVTR     | S(0.128)LY(0.131)S(0.1  | SLYS(ph)SPGGAYVTR          | CK1              | 1.0                       | 0.22766      |            | Yes                    |
| 1246 | IPI00227299 | Vimentin;Vimentin        | Vim;Vim;RP23-185P20   | S55   | 1         | 5             | SLYSSSPGGAYVTR     | S(0.128)LY(0.131)S(0.1  | SLYS(ph)SPGGAYVTR          | NEK6             |                           |              |            | No                     |
| 436  | IPI00227299 | Vimentin;Vimentin        | Vim;Vim;RP23-185P20   | S56   | 1         | 6             | SLYSSSPGGAYVTR     | SLYSSS(1)PGGAYVTR       | SLYSSS(ph)PGGAYVTR         | Polo box         | 1.0                       | 0.22766      |            | Yes                    |
| 731  | IPI00923704 | Wings apart-like homo    | Wapal;Wapal;Kiaa0261  | S77   | 1         | 14            | VEEEDTGDPFGFSDDE   | VEEEDTGDPFGFDS(1)D      | VEEEDTGDPFGFDS(ph)         | CK2              | 1.0                       | 0.36255      |            | Yes                    |
| 1268 | IPI00923704 | Wings apart-like homo    | Wapal;Wapal;Kiaa0261  | S81   | 1         | 18            | VEEEDTGDPFGFSDDE   | VEEEDT(0.001)GDPFGF     | VEEEDTGDPFGFDS(ph)         | PLK1             |                           |              |            | No                     |
| 475  | IPI00123333 | WW domain-binding pr     | Wbp11                 | S237  | 1         | 9             | RRDEDMLYSPELAQR    | RRDEDMLY(0.031)S(0.9    | RRDEDM(ox)LYS(ph)PELAQR    |                  | 1.0                       | 0.24495      |            | Yes                    |
| 244  | IPI00123333 | WW domain-binding pr     | Wbp11                 | Y236  | 1         | 8             | RRDEDMLYSPELAQR    | RRDEDMLY(0.86)S(0.14    | RRDEDMLY(ph)SPELAQR        | SRC              | 1.4                       | 0.08766      |            | Yes                    |
| 908  | IPI00229856 | WD repeat-containing 1   | Wdr42a;D1Ucla4;H326   | S100  | 1         | 2             | GHGHSDEDEEQPR      | GHGHS(1)DEDEEQPR        | GHGHS(ph)DEDEEQPR          | CK2              | 1.1                       | 0.44341      |            | Yes                    |
| 894  | IPI00459468 | ATPase WRNIP1;Werne      | Wrnrip1;Whip;Wrnrip1  | S153  | 1         | 15            | RPAAAAAGSASPR      | RPAAAAAGSAS(0.021)AS    | RPAAAAAGSAS(ph)SP          | CDK1             | 1.1                       | 0.43515      |            | Yes                    |
| 380  | IPI00121100 | Protein WWC2;WW do       | Wwc2;D8ErtD594e;MN    | T999  | 1         | 3             | SQTFSPGER          | SQT(1)FSPGER            | SQT(ph)FSPGER              | PKA/AKT          | 0.9                       | 0.18891      |            | Yes                    |
| 768  | IPI00120046 | 5'-3' exoribonuclease 2  | Xrn2;Dhm1;Xrn2;Dhm1   | S499  | 2         | 5             | KAEDSDSEPEPEDNVR   | KAEDS(1)DS(1)EPEPEDN    | KAEDS(ph)DS(ph)EPE         | CK2              | 1.2                       | 0.37809      |            | Yes                    |
| 769  | IPI00120046 | 5'-3' exoribonuclease 2  | Xrn2;Dhm1;Xrn2;Dhm1   | S501  | 2         | 7             | KAEDSDSEPEPEDNVR   | KAEDS(1)DS(1)EPEPEDN    | KAEDS(ph)DS(ph)EPE         | CK2              | 1.2                       | 0.37809      |            | Yes                    |
| 906  | IPI00108989 | Yap1 protein;Yes-assoc   | Yap1;mCG 9891;Yap1    | S46   | 1         | 3             | GDSSETDLEALFNAMVNP | GDS(0.5)ET(0.5)DLEALF   | GDS(ph)ETDLEALFNAM         | CAMK2            | 1.1                       | 0.44246      |            | No                     |
| 258  | IPI00108989 | Yap1 protein;Yes-assoc   | Yap1;mCG 9891;Yap1    | T48   | 1         | 5             | GDSSETDLEALFNAMVNP | GDS(0.195)ET(0.805)D    | GDS(ph)ETDLEALFNAM         | CK2              | 1.4                       | 0.099744     |            | Yes                    |

| No      | IPI Numbers | Protein Names           | Gene Names             | pAA   | Number of P | Position in p | Peptide Sequence   | Phospho (STY) Probabi   | Modified Sequence                | Best Motif | Ratio <sup>1</sup> of Phd | Ratio Signif | Up-/Down-r | Localized phosphosite? |
|---------|-------------|-------------------------|------------------------|-------|-------------|---------------|--------------------|-------------------------|----------------------------------|------------|---------------------------|--------------|------------|------------------------|
| 1153    | IPI00849786 | Nuclease-sensitive elen | Ybx1;Msy-1;Msy1;Nse    | S166  | 1           | 9             | NYQQNYQNSSEGEKNE   | NY(0.029)QQNY(0.029)    | _NYQQNYQNS(ph)ESGKNEGSESPEGQAQQR |            |                           |              | No         |                        |
| 1158    | IPI00849786 | Nuclease-sensitive elen | Ybx1;Msy-1;Msy1;Nse    | S168  | 1           | 11            | NYQQNYQNSSEGEKNE   | NY(0.029)QQNY(0.029)    | _NYQQNYQNS(ph)ESGKNEGSESPEGQAQQR |            |                           |              | No         |                        |
| 611     | IPI00849786 | Nuclease-sensitive elen | Ybx1;Msy-1;Msy1;Nse    | S177  | 1           | 20            | NYQQNYQNSSEGEKNE   | NY(0.001)QQNY(0.003)    | _NYQQNYQNSSEGEKNE                | CK2        | 1.0                       | 0.30582      | No         |                        |
| 324     | IPI00222801 | Proto-oncogene tyrosin  | Yes1;Yes;Fyn;Fyn;Lck;L | T425  | 1           | 8             | LIEDNEYTAR         | LIEDNEY(0.5)TI(0.5)AR   | LIEDNEY(ph)TAR                   |            | 0.9                       | 0.14459      | No         |                        |
| 267     | IPI00222801 | Proto-oncogene tyrosin  | Yes1;Yes;Fyn;Fyn;Lck;L | Y424  | 1           | 7             | LIEDNEYTAR         | LIEDNEY(0.997)TI(0.003) | LIEDNEY(ph)TAR                   |            | 0.9                       | 0.10517      | Yes        |                        |
| 967     | IPI00515528 | Zinc finger CCCH type c | Zc3h13                 | S1273 | 1           | 3             | LRSPNSNDSAHR       | LR(0.999)PS(0.001)ND    | LR(ph)PSNDSAHR                   | CAMK2      | 1.1                       | 0.46224      | Yes        |                        |
| 482     | IPI00673693 | Zinc finger CCCH doma   | Zc3h18;Nhn1            | S552  | 2           | 4             | LGVSVSPSR          | LGVS(0.999)VS(0.997)P   | LGVS(ph)VS(ph)PSR                | NEK6       | 1.0                       | 0.24903      | Yes        |                        |
| 761     | IPI00673693 | Zinc finger CCCH doma   | Zc3h18;Nhn1            | S554  | 1           | 6             | LGVSVSPSR          | LGVSVS(1)PSR            | LGVSVS(ph)PSR                    | CDK2       | 1.2                       | 0.37569      | Yes        |                        |
| 1305    | IPI00673693 | Zinc finger CCCH doma   | Zc3h18;Nhn1            | S556  | 1           | 8             | LGVSVSPSR          | LGVS(0.006)VS(0.497)P   | (ca)LGVSVS(ph)PSR                | CK1        |                           |              | No         |                        |
| 645     | IPI00673693 | Zinc finger CCCH doma   | Zc3h18;Nhn1            | S871  | 1           | 4             | ANLSPDRGSR         | ANLS(1)PDRGSR           | ANLS(ph)PDRGSR                   | CDK2       | 1.2                       | 0.32577      | Yes        |                        |
| 266     | IPI00673693 | Zinc finger CCCH doma   | Zc3h18;Nhn1;Zc3h18;N   | S58   | 1           | 3             | VQSQEETRSDEDRASEF  | VQS(0.82)QEET(0.17)RS   | VQS(ph)QEETRSDEED                | CAMK2      | 1.4                       | 0.10396      | Yes        |                        |
| 627     | IPI00136572 | Zinc finger CCCH-type a | Zc3hav1;Zc3hav1;Zc3h   | S324  | 1           | 2             | ASQEFLEDGDPDGLFSR  | AS(1)QEFLEDGDPDGLFS     | AS(ph)QEFLEDGDPDG                | PKA        | 1.0                       | 0.31513      | Yes        |                        |
| 49      | IPI00465879 | Nuclear-interacting par | Zc3hc1;Nipa;Zc3hc1;Ni  | S406  | 1           | 3             | LCSSSSSDTSR        | LCS(0.923)S(0.07)S(0.0) | LCS(ph)SSSSSDTSR                 | PKA/AKT    | 2.6                       | 4.931E-07    | Up         | Yes                    |
| 1276    | IPI00124064 | Probable palmitoyltran  | Zdhc5;Kiaa1748;Zdhh    | S376  | 1           | 2             | LSRGDSLKEPTSIADSSR | LS(0.499)RGDS(0.499)L   | LS(ph)RGDSLKEPTSIAC              | GSK3       |                           |              | No         |                        |
| 883     | IPI00124064 | Probable palmitoyltran  | Zdhc5;Kiaa1748;Zdhh    | S380  | 1           | 6             | LSRGDSLKEPTSIADSSR | LS(0.002)RGDS(0.998)L   | LSRGDS(ph)LKEPTSIAC              | CHK1/2     | 1.1                       | 0.43033      | Yes        |                        |
| 293     | IPI00131810 | Zinc finger RNA-binding | Zfr                    | S1054 | 1           | 4             | RRDSGVDGDFEAEAGK   | RRDS(1)DGVDFEAEAGK      | RRDS(ph)DGVDFEAE                 | PKA        | 1.3                       | 0.1228       | Yes        |                        |
| 1000    | IPI00126804 | Zinc finger Ran-binding | Zranb2;Zfp265;Zis;Znf2 | S130  | 1           | 11            | ENVEYIEREESDGEYDEF | ENVEY(0.001)IEREES(0.   | _ENVEYIEREES(ph)DGE              | PKD        | 1.1                       | 0.47786      | Yes        |                        |
| 539     | IPI00126804 | Zinc finger Ran-binding | Zranb2;Zfp265;Zis;Znf2 | S163  | 1           | 7             | EVEDKESGEEDEDEDL   | EVEDKES(1)EGEEDEDE      | EVEDKES(ph)EGEEDE                | CK2        | 1.2                       | 0.27081      | Yes        |                        |
| 801     | IPI00126804 | Zinc finger Ran-binding | Zranb2;Zfp265;Zis;Znf2 | S198  | 1           | 22            | YKLDEDEDEDDADLSKYN | YKLDEDEDEDDADLS(0.0     | YKLDEDEDEDDADLSKYN               | CK2        | 1.1                       | 0.39263      | Yes        |                        |
| 1331    | IPI00126804 | Zinc finger Ran-binding | Zranb2;Zfp265;Zis;Znf2 | S203  | 1           | 27            | YKLDEDEDEDDADLSKYN | Y(0.16)KLDEDEDEDDAD     | YKLDEDEDEDDADLSKYNLDAS(ph)EEDSNK |            |                           |              | No         |                        |
| 102     | IPI00387422 | Putative uncharacteriz  | Zyx;Zyx;Zyx            | S336  | 1           | 1             | SPGGPGPLTLK        | S(1)PGGPGPLTLK          | _S(ph)PGGPGPLTLK                 | ERK/MAPK   | 1.8                       | 0.0014985    | Up         | Yes                    |
| 501     | IPI00132478 | Uncharacterized protein | C6orf203 homolog       | S106  | 1           | 7             | EAEDEESDEETSYPERS  | EAEDEES(0.997)DEET(0    | EAEDEES(ph)DEETSYP               | CK2        | 1.2                       | 0.25801      | Yes        |                        |
| 839     | IPI00224561 | UPF0550 protein C7orf28 | homolog                | S264  | 1           | 11            | HIEPELAGRDSPVRAEM  | HIEPELAGRDS(0.999)PV    | HIEPELAGRDS(ph)PVR               | CDK2       | 1.1                       | 0.40914      | Yes        |                        |
| The End |             |                         |                        |       |             |               |                    |                         |                                  |            |                           |              |            |                        |

<sup>1</sup> The ratios are normalized to correct for unequal amounts of "light" and "heavy" protein in the assay. For the peptides where a value for ""Ratio of Phosphorylations (+GH/-GH), Normalized"" is not listed, one or both peptide signals in the corresponding peptide pair (light and heavy) were below the threshold for quantification.



| No  | IPI Numbers | Protein Names              | Gene Names               | pAA   | Number of | Position in p | Peptide Sequence   | Phospho (STY) Probabi | Modified Sequence                               | Best Motif              | Ratio <sup>1</sup> of Phd | Ratio Signifid | Up-/Down-r | Phosphosites Localized? |
|-----|-------------|----------------------------|--------------------------|-------|-----------|---------------|--------------------|-----------------------|-------------------------------------------------|-------------------------|---------------------------|----------------|------------|-------------------------|
| 99  | IPI00119618 | Calnexin                   | Canx                     | S582  | 1         | 10            | AEDEILNRSR         | AEDEILNRS(ph)PR       | AEDEILNRS(1)PR                                  | CDK1                    | 0.9                       | 0.17936        |            | Yes                     |
| 176 | IPI00133349 | Calcium-regulated heat     | Carhsp1                  | S42   | 1         | 6             | GNVVPSPLPTRR       | (ca)GNVVPSP(ph)PLPTR  | GNVVPSP(0.999)PLPTO                             | ERK/MAPK                | 1.1                       | 0.33687        |            | Yes                     |
| 55  | IPI00133349 | Calcium-regulated heat     | Carhsp1                  | S53   | 1         | 3             | TFSATVR            | TFS(ph)ATVR           | TFS(1)ATVR                                      | PKA/AKT                 | 1.5                       | 0.062937       |            | Yes                     |
| 96  | IPI00551498 | Girdin;Girders of actin    | Ccdc88a;Grdn;Kiaa121     | S1704 | 1         | 3             | SSSQENLLDEVK       | SSS(ph)QENLLDEVK      | S(0.098)S(0.054)S(0.848)QENLLDEVK               |                         | 0.9                       | 0.17468        |            | Yes                     |
| 183 | IPI00170037 | Malcaverin;Cerebral c      | Ccm2;Osm;Ccm2;Osm        | S393  | 1         | 6             | GIITDSFGR          | GIITDS(ph)FGR         | GIIT(0.001)DS(0.999)FGR                         |                         | 1.1                       | 0.34547        |            | Yes                     |
| 267 | IPI00308149 | Cyclin-Y;Cyclin fold pro   | Ccny;Cfp1;Ccny;Cfp1      | S326  | 1         | 3             | SASADNLILPR        | SAS(ph)ADNLILPR       | S(0.103)AS(0.897)ADNL                           | PKA/AKT                 | 1.1                       | 0.46047        |            | No                      |
| 207 | IPI00753875 | Putative uncharacterize    | Ccny1                    | S350  | 1         | 1             | SLSADNFIGIQR       | S(ph)LSADNFIGIQR      | S(0.755)LS(0.245)ADNF                           | NIMA                    | 1.1                       | 0.39447        |            | Yes                     |
| 211 | IPI00410802 | CD44 antigen;Phagocyt      | Cd44;Ly-24;Cd44;Ly-2     | T728  | 1         | 9             | LVINGGNGTVEDR      | LVINGGNGT(ph)VEDR     | LVINGGNGT(1)VEDR                                | FHA1 Rad53p             | 1.1                       | 0.39966        |            | Yes                     |
| 129 | IPI00464128 | Cell division cycle 2-like | Cdc2l5;Kiaa1791;Cdc2l    | T1245 | 1         | 5             | IILETPEDRPR        | IILELT(ph)PEPDRPR     | IILELT(1)PEPDRPR                                | NEK6                    | 0.9                       | 0.23988        |            | Yes                     |
| 157 | IPI00138190 | Cadherin-11;Osteoblas      | Cdh11;Cad-11             | S788  | 1         | 7             | LADLYGSKDTFDDDS    | LADLYGS(ph)KDTFDD     | LADLY(0.102)GS(0.797)                           | NEK6                    | 1.2                       | 0.30396        |            | Yes                     |
| 414 | IPI00124240 | Cell division protein kin  | Cdk2;Cdk3;Cdk2;Cdc2      | Y15   | 1         | 6             | IGEGTYGVVYK        | IGEGTY(ph)GVVYK       | IGEGT(0.071)Y(0.929)G                           | ALK                     |                           |                |            | No                      |
| 347 | IPI00399663 | Centromere-associated      | Centpe                   | S451  | 2         | 2             | TSVTSLRENSLMK      | (ca)T(ph)S(ph)VTSLRE  | T(1)S(1)VTSLRENSLMK                             | PKA/AKT                 |                           |                |            | Yes                     |
| 398 | IPI00399663 | Centromere-associated      | Centpe                   | T450  | 2         | 1             | TSVTSLRENSLMK      | (ca)T(ph)S(ph)VTSLRE  | T(1)S(1)VTSLRENSLMK                             | PKA                     |                           |                |            | No                      |
| 109 | IPI00890117 | Cofilin-1;Cofilin, non-m   | Cfl1;Cfl1                | S3    | 1         | 2             | ASGVAVSDGVK        | (ca)AS(ph)GVAVSDGV    | AS(1)GVAVSDGVK                                  |                         | 0.9                       | 0.20239        |            | Yes                     |
| 142 | IPI00222386 | Charged multivesicular     | Chmp2b                   | S199  | 1         | 4             | ATISDEEIER         | ATIS(ph)DEEIER        | ATIS(1)DEEIER                                   | CK2                     | 1.2                       | 0.27722        |            | No                      |
| 247 | IPI00467854 | CAP-Gly domain-contai      | Clip2;Cyln2;Kiaa0291;C   | S924  | 1         | 10            | VLLLEANRHSPPGER    | VLLLEANRHS(ph)PGPE    | VLLLEANRHS(1)PGPER                              | PKA                     | 1.1                       | 0.44697        |            | Yes                     |
| 356 | IPI00762331 | Cordon-bleu protein-lik    | Cobl1;Cobl1;Kiaa0977     | S364  | 1         | 1             | STSVDDTDKSSSEAIMVR | S(ph)TSDVDDTDKSSSEAI  | S(0.438)T(0.281)S(0.281)S(0.281)VDDTDKSSSEAIMVR |                         |                           |                |            | No                      |
| 50  | IPI00928004 | Putative uncharacterize    | Copa;Copa                | S173  | 1         | 3             | NLSPGAVESDVR       | NLS(ph)PGAVESDVR      | NLS(1)PGAVESDVR                                 |                         | 1.5                       | 0.053828       |            | No                      |
| 311 | IPI00123891 | Cysteine and glycine-ric   | Csrp1;Crp1;Csrp          | S192  | 1         | 14            | GFGFGQGAGALVHSE    | GFGFGQGAGALVHS(ph)    | GFGFGQGAGALVHS(1)E                              | NEK6                    |                           |                |            | Yes                     |
| 236 | IPI00112963 | Catenin alpha-1;102 kD     | Ctnn1;Catna1             | S641  | 1         | 8             | TPPELDDSFETEDFVR   | TPPELDDS(ph)DFETED    | TPPELDDS(1)DFETEDF                              | CK2                     | 1.1                       | 0.43413        |            | Yes                     |
| 69  | IPI00128975 | Death-associated prote     | Dap                      | S51   | 1         | 11            | DKDDQEWESTSPPKPTV  | DKDDQEWESTS(ph)PH     | DKDDQEWES(0.013)T(0.013)C                       | CDK2                    | 1.4                       | 0.10649        |            | No                      |
| 378 | IPI00761729 | Serine/threonine-prote     | Dck1;Dcamk1;Dck1;Dc      | S352  | 1         | 7             | DLYRPLSDDLDSVGDV   | DLYRPLS(ph)SDDLDSV    | DLYRPLS(0.499)S(0.499)S                         | CHK1/2                  |                           |                |            | No                      |
| 379 | IPI00761729 | Serine/threonine-prote     | Dck1;Dcamk1;Dck1;Dc      | S353  | 1         | 8             | DLYRPLSDDLDSVGDV   | DLYRPLS(ph)SDDLDSV    | DLYRPLS(0.499)S(0.499)S                         | DDLDS(0.002)VGDSV       |                           |                |            | Yes                     |
| 380 | IPI00761729 | Serine/threonine-prote     | Dck1;Dcamk1;Dck1;Dc      | S362  | 1         | 17            | DLYRPLSDDLDSVGDV   | DLYRPLSDDLDSVGDV      | DLY(0.158)RPLS(0.146)                           | CK1                     |                           |                |            | No                      |
| 191 | IPI00896604 | Probable ATP-depende       | Ddx10                    | T587  | 1         | 14            | LASGDGDEEQDEETE    | LASGDGDEEQDEE(ph)     | LASGDGDEEQDEE(1)E                               | CK2                     | 1.0                       | 0.35681        |            | No                      |
| 100 | IPI00120691 | Nucleolar RNA helicase     | Ddx21;Ddx21;mcG          | S118  | 1         | 15            | QADSETKEIITEPSEEA  | QADSETKEIITEPSE(ph)   | QADSETKEIT(0.005)EE                             | CK2                     | 0.9                       | 0.18436        |            | Yes                     |
| 89  | IPI00113576 | ATP-dependent RNA he       | Ddx24;Ddx24              | S126  | 1         | 5             | AQAVSEEEEEEGSSP    | AQAVS(ph)EEEEEEGSS    | AQAVS(1)EEEEEEGSS                               | CK2                     | 1.3                       | 0.1578         |            | No                      |
| 246 | IPI00113635 | H/ACA ribonucleoprote      | Dkc1;Dkc1;BC068171       | S508  | 1         | 8             | VKVVEEMSE          | VKVVEEMS(ph)E         | VKVVEEMS(1)E                                    |                         | 1.0                       | 0.4466         |            | Yes                     |
| 76  | IPI00125861 | Disks large homolog 1;     | Dlg1;Dlgh1;Dlg1;Dlgh1    | S575  | 1         | 14            | EQMMNNSVSSGSGSLR   | EQMMNNSVSSGSGS(ph)    | EQMMNNSVSSGSGS(0.013)                           | GSK3                    | 1.4                       | 0.12241        |            | No                      |
| 66  | IPI00816914 | Dedicator of cytokines     | Dock7;Gm430;Kiaa177      | S900  | 1         | 5             | SLSNSNPDISGTPSPDDI | SLSNS(ph)NPDISGTPPT   | S(0.107)LS(0.064)NS(0.0)                        | NEK6                    | 0.8                       | 0.090241       |            | Yes                     |
| 14  | IPI00882020 | Putative uncharacterize    | Dpf2;Dpf2;Req;Ubid4      | S142  | 1         | 5             | VDDDSLGEFVPSNSR    | VDDDS(ph)LGEFVPSNS    | VDDDS(1)LGEFVPSNSR                              | PLK                     | 0.6                       | 6.61E-05       | Down       | No                      |
| 65  | IPI00114375 | Dihydropyrimidinase-re     | Dpysl2;Crmp2;Ulip2       | T509  | 1         | 13            | GLYDGPVCEVSTPK     | GLYDGPVCEVST(ph)      | GLYDGPVCEVS(0.001)Y                             | CDK1                    | 0.8                       | 0.078542       |            | Yes                     |
| 107 | IPI00406447 | Collapsin response me      | Dpysl3;Dpysl3;Drp3;Uli   | T622  | 1         | 13            | GMVDGVPFDLTTTPK    | GMVDGVPFDLTTT(ph)     | GMVDGVPFDLTT(0.004)                             | CDK1                    | 0.9                       | 0.20093        |            | Yes                     |
| 156 | IPI00127942 | Destrin;Actin-depolyme     | Dstn;Dsn;Sid23           | S3    | 1         | 2             | ASGVQVADEVCR       | (ca)AS(ph)GVQVADEV    | AS(1)GVQVADEVCR                                 |                         | 1.2                       | 0.29601        |            | Yes                     |
| 181 | IPI00380332 | Dual specificity phosph    | Dusp9;RP23-329M9.2       | S393  | 1         | 1             | SNISPNFNFMGQLLDFE  | S(ph)SNISPNFNFMGQVL   | S(0.61)NIS(0.39)PNFNF                           | PKA                     | 1.1                       | 0.3442         |            | Yes                     |
| 21  | IPI00118849 | Dual specificity tyrosine  | Dyrk1a;Dyrk;Dyrk1a;RP    | Y321  | 1         | 2             | IYQYIQSR           | IYQY(ph)IQSR          | IYQY(1)IQSR                                     |                         | 0.7                       | 0.0030188      | Down       | No                      |
| 365 | IPI00848728 | Enhanced at puberty p      | Eap1;Kiaa1865            | S694  | 1         | 2             | NSSSPVSPASVPGQR    | NS(ph)SSPVSPASVPGQ    | NS(0.332)S(0.332)S(0.3)                         | PKA/AKT                 |                           |                |            | No                      |
| 366 | IPI00848728 | Enhanced at puberty p      | Eap1;Kiaa1865            | S695  | 1         | 3             | NSSSPVSPASVPGQR    | NS(ph)SSPVSPASVPGQ    | NS(0.332)S(0.332)S(0.3)                         | CAMK2                   |                           |                |            | Yes                     |
| 13  | IPI00848728 | Enhanced at puberty p      | Eap1;Kiaa1865            | S696  | 1         | 4             | NSSSPVSPASVPGQR    | NSSS(ph)PVSPASVPGQ    | NS(0.08)S(0.08)S(0.832)                         | Polo box                | 0.5                       | 1.19E-05       | Down       | No                      |
| 264 | IPI00330066 | Enhancer of mRNA-dec       | Edc4;Edc4                | S727  | 1         | 28            | GPGQVSTAASALDLQ    | GPGQVSTAASALDLQ       | GPGQVSTAASALDLQ                                 | CDK2                    | 1.1                       | 0.45692        |            | No                      |
| 36  | IPI00320208 | Elongation factor 1-bet    | Eef1b;Eef1b2             | S106  | 1         | 28            | YGPSSVEDTTGSGAADA  | YGPSSVEDTTGSGAAD      | YGPSSVEDTTGSGAADA                               | CK2                     | 0.8                       | 0.032437       | Down       | Yes                     |
| 221 | IPI00944009 | Elongation factor 1-del    | Eef1d;Eef1d;Eef1d;Eef    | S541  | 1         | 18            | GATPAEDEDKIDIDLF   | GATPAEDEDKIDIDLF      | GATPAEDEDKIDIDLF                                | CK2                     | 1.1                       | 0.41713        |            | Yes                     |
| 93  | IPI00402968 | EH domain-containing       | Ehd2                     | S438  | 1         | 13            | GPDEAIEDGEGESDFAI  | GPDEAIEDGEGES(ph)     | GPDEAIEDGEGES(1)EDDAE                           | VWVTK                   | 0.9                       | 0.16562        |            | Yes                     |
| 235 | IPI00261239 | Translation initiation fa  | Eif2b5                   | S540  | 1         | 3             | AGSPQLDDIR         | AGS(ph)PQLDDIR        | AGS(1)PQLDDIR                                   | CAMK2                   | 1.1                       | 0.43344        |            | Yes                     |
| 357 | IPI00417155 | Eukaryotic translation     | Eif4g3;Eif4g3;Eif4g3;Eif | S277  | 1         | 22            | EQAGQMPETAAGEPTPI  | EQAGQMPETAAGEPTP      | EQAGQMPETAAGEPTP                                | PKA                     |                           |                |            | Yes                     |
| 358 | IPI00417155 | Eukaryotic translation     | Eif4g3;Eif4g3;Eif4g3;Eif | S278  | 1         | 23            | EQAGQMPETAAGEPTPI  | EQAGQMPETAAGEPTP      | EQAGQMPETAAGEPTP                                | PKA/AKT                 |                           |                |            | Yes                     |
| 359 | IPI00417155 | Eukaryotic translation     | Eif4g3;Eif4g3;Eif4g3;Eif | S281  | 1         | 26            | EQAGQMPETAAGEPTPI  | EQAGQMPETAAGEPTP      | EQAGQMPETAAGEPTP                                | CK1                     |                           |                |            | Yes                     |
| 404 | IPI00417155 | Eukaryotic translation     | Eif4g3;Eif4g3;Eif4g3;Eif | T280  | 1         | 25            | EQAGQMPETAAGEPTPI  | EQAGQMPETAAGEPTP      | EQAGQMPETAAGEPTP                                | CK1                     |                           |                |            | Yes                     |
| 174 | IPI00756424 | Eukaryotic translation     | Eif5b;Iif2;Eif5b;Iif2    | S114  | 1         | 8             | TSFDENDEELEDKDKSK  | TSFDENDS(ph)ELEDK     | TSFDENDS(1)ELEDKDKSK                            |                         | 1.1                       | 0.3356         |            | Yes                     |
| 184 | IPI00756424 | Eukaryotic translation     | Eif5b;Iif2;Eif5b;Iif2    | S137  | 1         | 11            | TARPNSEAPLSGSEDADL | TARPNSEAPLS(ph)GSE    | TARPNSEAPLS(0.982)G                             | CK2                     | 1.1                       | 0.34552        |            | Yes                     |
| 209 | IPI00756424 | Eukaryotic translation     | Eif5b;Iif2;Eif5b;Iif2    | S215  | 1         | 7             | SVPTVDSGNEDDSSFK   | SVPTVDS(ph)GNEDDD     | SVPTVDS(1)GNEDDSS                               | CK2                     | 1.1                       | 0.39881        |            | Yes                     |
| 336 | IPI00403406 | Epb4.112 protein;Eryth     | Epb4.112;Epb4.112        | S596  | 1         | 11            | ATPLPAEGKSSHETLN   | ATPLPAEGKSS(ph)HET    | ATPLPAEGKS(0.097)S(0.451)HET                    | (0.451)LN               |                           |                |            | No                      |
| 364 | IPI00464296 | Band 4.1-like protein 3    | Epb4113;Dal1;Epb4.113    | S962  | 1         | 10            | VESTSVSGISPGGAK    | VESTSVSGIS(ph)PGGA    | VESTS(0.001)VGS(0.113)S(0.886)PGGAK             |                         | 0.9                       | 0.15866        |            | Yes                     |
| 90  | IPI00464280 | Epsin 2;Epsin-2;EPS-15     | Epn2;RP23-15513.7-004    | S172  | 1         | 2             | GSSQPNLSTSYSEYQY   | GS(ph)SQPNLSTSYSEY    | GS(0.5)S(0.5)QPNLSTSY                           | PKA                     | 1.2                       | 0.28147        |            | Yes                     |
| 145 | IPI00464280 | Epsin 2;Epsin-2;EPS-15     | Epn2;RP23-15513.7-004    | S173  | 1         | 3             | GSSQPNLSTSYSEYQY   | GS(ph)QPNLSTSYSEY     | GS(0.119)S(0.881)QPN                            | CAMK2                   | 1.2                       | 0.28147        |            | Yes                     |
| 37  | IPI00420185 | Epidermal growth fact      | Eps15l1;Eps15-rs;Eps1    | S255  | 1         | 18            | STPHSGVSSLNSTGSL   | STPHSGVSSLNSTGSL      | STPHSGVSSLNSTGSL                                | CDK1                    | 0.8                       | 0.033532       | Down       | Yes                     |
| 169 | IPI00896710 | Protein LAP2;ErbB2-int     | ErbB2ip;Erbin;Kiaa122    | S849  | 1         | 12            | ASSADVGISKSTEDLSP  | ASSADVGISKSTEDLSP     | ASSADVGISKSTEDLSP                               | (0.997)T(0.003)EDLSPQR  | 1.1                       | 0.32815        |            | Yes                     |
| 405 | IPI00896710 | Protein LAP2;ErbB2-int     | ErbB2ip;Erbin;Kiaa122    | T850  | 1         | 13            | ASSADVGISKSTEDLSP  | ASSADVGISKSTEDLSP     | ASSADVGISKSTEDLSP                               | AS(0.035)S(0.094)S(0.0) | CK1                       |                |            | Yes                     |
| 131 | IPI00223670 | Protein FAM40A;Prote       | Fam40a;Kiaa1761;Fam      | S335  | 1         | 3             | AASPPASADLIEQQQK   | AAASPPASADLIEQQQ      | AAAS(0.863)PPAS(0.132)                          | CAMK2                   | 0.9                       | 0.24666        |            | Yes                     |
| 54  | IPI00874398 | Protein FAM65A             | Fam65a;Kiaa1930          | S417  | 1         | 7             | FSTYSQSPDPDTPSLR   | FSTYSQSP(ph)PDPDTP    | F(0.018)T(0.018)Y(0.0)                          | CK1                     | 0.8                       | 0.059528       |            | Yes                     |
| 376 | IPI00678532 | Regulator of microtubu     | Fam82a2;Fam82c;120C      | S46   | 1         | 3             | SHSLPNSLDYAQASER   | SHS(ph)LPNSLDYQAAS    | S(0.055)HS(0.473)LPNS                           | 14-3-3 binding          |                           |                |            | Yes                     |
| 377 | IPI00678532 | Regulator of microtubu     | Fam82a2;Fam82c;120C      | S50   | 1         | 7             | SHSLPNSLDYAQASER   | SHS(ph)LPNSLDYQAAS    | S(0.055)HS(0.473)LPNS                           | NEK6                    |                           |                |            | Yes                     |
| 59  | IPI00378206 | F-box/WD repeat-cont       | Fbxw8;Fbxw8              | S86   | 1         | 3             | SRSPPPDRDATEPEPLV  | SRS(ph)PPDRDATEPEP    | S(0.193)RS(0.805)PPDR                           | 14-3-3 binding          | 1.5                       | 0.067597       |            | Yes                     |
| 81  | IPI00921658 | Filamin, alpha;Filamin     | Flna;RP23-436K3.1-003    | S968  | 1         | 10            | SPFSVGVSPSLDLSK    | SPFSVGVSPSLDLSK       | SPFSVGVSPSLDLSK                                 | (0.087)PS(0.0)          | 1.4                       | 0.1306         |            | No                      |
| 31  | IPI00664670 | Filamin-C;Gamma-filam      | Flncc;Abpl;Flnc2;Flncc   | S2234 | 1         | 3             | LGSFGSITR          | LGS(ph)FGSITR         | LGS(1)FGSITR                                    | PKA/AKT                 | 1.7                       | 0.017833       | Up         | Yes                     |
| 308 | IPI00119242 | Formin-binding protein     | Fmnp4;Fbp30;Kiaa1014     | S486  | 1         | 13            | ALEEGDGSVSGSSPR    | ALEEGDGSVSGSS(ph)     | ALEEGDGS(0.003)VS(0)                            | Polo box                |                           |                |            | Yes                     |

| No  | IPI Numbers | Protein Names            | Gene Names                | pAA   | Number of P | Position in p | Peptide Sequence    | Phospho (STY) Probabi | Modified Sequence                                              | Best Motif             | Ratio <sup>1</sup> of Phd | Ratio Signific | Up-/Down-r | Phosphosites Localized? |
|-----|-------------|--------------------------|---------------------------|-------|-------------|---------------|---------------------|-----------------------|----------------------------------------------------------------|------------------------|---------------------------|----------------|------------|-------------------------|
| 68  | IPI00130455 | Phospholemman;FXD        | Fxyd1;Plm                 | S83   | 1           | 14            | TGPEDEEETFRSSIR     | TGPEDEEETFRSSIR(ph)   | TGPEDEEETFRSSIR(1)IR                                           | AURORA                 | 0.8                       | 0.10333        |            | No                      |
| 175 | IPI00130455 | Phospholemman;FXD        | Fxyd1;Plm                 | T79   | 1           | 10            | TGPEDEEETFRSSIR     | TGPEDEEETFRSSIR(ph)   | TGPEDEEETFRSSIR(0.778)FR                                       | PLK1                   | 1.1                       | 0.33565        |            | No                      |
| 126 | IPI00130095 | Ras GTPase-activating    | G3bp1;G3bp;G3bp1;G3       | S229  | 1           | 1             | STSPAPADVAPAQEDLR   | S(ph)TSPAPADVAPAQ     | S(0.97)T(0.015)S(0.015)PAPADVAPAQEDLR                          |                        | 1.2                       | 0.23413        | Yes        |                         |
| 73  | IPI00124245 | Ras GTPase-activating    | G3bp2;G3bp2               | S225  | 1           | 1             | SATPPPAEPASLPQPEPK  | S(ph)ATPPPAEPASLPQ    | S(0.578)AT(0.422)PPPAEPASLPQPEPK                               |                        | 0.9                       | 0.11808        | Yes        |                         |
| 72  | IPI00124245 | Ras GTPase-activating    | G3bp2;G3bp2               | T227  | 1           | 11            | HLEELLESKATPPPAEPAS | HLEELLESKAT(ph)PPP    | HLEELLESK(0.009)AT(0.991)PPPAEPASLPQPEPK                       |                        | 0.9                       | 0.11659        | Yes        |                         |
| 296 | IPI00114226 | Endothelial transcriptid | Gata2                     | S425  | 3           | 16            | GAEFFEELSKCMQEKSP   | GAEFFEELSKCMQEK(S)    | GAEFFEELSKCMQEK(S)                                             | GSK3                   |                           |                | Yes        |                         |
| 297 | IPI00114226 | Endothelial transcriptid | Gata2                     | S429  | 3           | 20            | GAEFFEELSKCMQEKSP   | GAEFFEELSKCMQEK(S)    | GAEFFEELSKCMQEK(S)                                             | GSK3                   |                           |                | Yes        |                         |
| 298 | IPI00114226 | Endothelial transcriptid | Gata2                     | S447  | 3           | 38            | GAEFFEELSKCMQEKSP   | GAEFFEELSKCMQEK(S)    | GAEFFEELSKCMQEK(S)                                             | GSK3                   |                           |                | Yes        |                         |
| 299 | IPI00114226 | Endothelial transcriptid | Gata2                     | S449  | 3           | 40            | GAEFFEELSKCMQEKSP   | GAEFFEELSKCMQEK(S)    | GAEFFEELSKCMQEK(S)                                             | GSK3                   |                           |                | Yes        |                         |
| 300 | IPI00114226 | Endothelial transcriptid | Gata2                     | S462  | 3           | 53            | GAEFFEELSKCMQEKSP   | GAEFFEELSKCMQEK(S)    | GAEFFEELSKCMQEK(S)                                             | GSK3                   |                           |                | Yes        |                         |
| 301 | IPI00114226 | Endothelial transcriptid | Gata2                     | S463  | 3           | 54            | GAEFFEELSKCMQEKSP   | GAEFFEELSKCMQEK(S)    | GAEFFEELSKCMQEK(S)                                             | GSK3                   |                           |                | Yes        |                         |
| 302 | IPI00114226 | Endothelial transcriptid | Gata2                     | S464  | 3           | 55            | GAEFFEELSKCMQEKSP   | GAEFFEELSKCMQEK(S)    | GAEFFEELSKCMQEK(S)                                             | GSK3                   |                           |                | Yes        |                         |
| 130 | IPI00128615 | Transcriptional repress  | Gatad2b;Gatad2b           | S136  | 1           | 17            | LTPSPDIIVLSDNEASSPR | LTPSPDIIVLSDNEASSPR   | LTPSPDIIVLSDNEASSPR                                            | Polo box               | 0.9                       | 0.24144        | Yes        |                         |
| 153 | IPI00323179 | Rab GDP dissociation in  | Gdi1;Rabgdia              | S65   | 1           | 10            | FQILEGPPESMGR       | FQILEGPPES(ph)MGR     | FQILEGPPES(1)MGR                                               |                        | 1.2                       | 0.29154        | No         |                         |
| 216 | IPI00406371 | Glucosamine-fructose     | Gfpt1;Gfpt;Gfpt1;Gfpt     | S259  | 1           | 3             | VDSSTCLFPVEEK       | VDS(ph)TCLFPVEEK      | VDS(0.953)T(0.045)T(0.0)                                       | CHK1/2                 | 1.1                       | 0.40526        | Yes        |                         |
| 401 | IPI00406371 | Glucosamine-fructose     | Gfpt1;Gfpt;Gfpt1;Gfpt     | T260  | 1           | 4             | VDSSTCLFPVEEK       | VDS(ph)TCLFPVEEK      | VDS(0.333)T(0.333)T(0.0)                                       | FHA2 Rad53p            |                           |                | No         |                         |
| 402 | IPI00406371 | Glucosamine-fructose     | Gfpt1;Gfpt;Gfpt1;Gfpt     | T261  | 1           | 5             | VDSSTCLFPVEEK       | VDS(ph)TCLFPVEEK      | VDS(0.333)T(0.333)T(0.333)                                     | CLFPVEEK               |                           |                | Yes        |                         |
| 243 | IPI00473912 | PERQ amino acid-rich v   | Gigyf2;Kiaa0642;Perq2     | T383  | 1           | 21            | AGAEAESEVPTQLSSAR   | AGAEAESEVPTQLSSAR     | AGAEAESEVPTQLSSAR                                              | ERK/MAPK               | 1.0                       | 0.44565        | Yes        |                         |
| 419 | IPI00177243 | GTPase, IMAP family m    | Gimap9                    | Y126  | 1           | 1             | Y(M)ILFTHK          | Y(ph)MILFTHK          | Y(1)MILFTHK                                                    | ALK                    |                           |                | No         |                         |
| 295 | IPI00112024 | similar to QM protein    | GM4892                    | S116  | 2           | 6             | LQTGMSGAVGKPKQGTV   | (ca)LQT(ph)GMS(ph)G   | LQT(1)GMS(1)GAVGKPKQGTVAR                                      |                        |                           |                | Yes        |                         |
| 427 | IPI00458227 | similar to spermidine/s  | Gm552                     | Y27   | 1           | 1             | YEYEDQVILTEK        | (ca)Y(ph)EYEDQVILTE   | Y(0.939)EY(0.061)IEDQ                                          | EGFR                   |                           |                | Yes        |                         |
| 188 | IPI00222461 | Guanine nucleotide-bir   | Gnl3;Ns                   | S505  | 1           | 17            | NAEISDVAPVEETRELS   | NAEISDVAPVEETRELS     | NAEISDVAPVEET(0.006)                                           | CAMK2                  | 1.1                       | 0.3522         | Yes        |                         |
| 172 | IPI00131457 | Probable G-protein cou   | Gpr124;Tem5               | S1104 | 1           | 10            | ALPTATEDGSPVLGEGPA  | ALPTATEDGSP(ph)VLG    | ALPTAT(0.001)EDG(S)0.0                                         | CK1                    | 1.0                       | 0.33359        | Yes        |                         |
| 154 | IPI00461962 | Probable G-protein cou   | Gpr126;Dreg;Gm222         | S480  | 1           | 7             | LMTNNSASLEDGLR      | (ca)LMTNNSAS(ph)LED   | LMT(0.002)NNSAS(0.998)                                         | CK1                    | 1.2                       | 0.29154        | No         |                         |
| 232 | IPI00480321 | Glucocorticoid recepto   | Grff1;Kiaa1722            | S1179 | 1           | 7             | TFSVSGSDDDELGP      | TFSVSGS(ph)DDELGPI    | TFSVSGS(1)DDELGPIR                                             | CK2                    | 1.0                       | 0.43069        | Yes        |                         |
| 313 | IPI00648141 | Glycogen synthase kina   | Gsk3a;Gsk3b               | S278  | 1           | 6             | GEPNVSYICSR         | GEPNVS(ph)YICSR       | GEPNVS(0.491)Y(0.491)                                          | GSK3                   |                           |                | Yes        |                         |
| 102 | IPI00648141 | Glycogen synthase kina   | Gsk3a;Gsk3b               | Y279  | 1           | 11            | GEPNVSYICSR         | GEPNVS(ph)YICSR       | GEPNVS(0.002)Y(0.998)                                          | ICSR                   | 0.9                       | 0.18639        | Yes        |                         |
| 29  | IPI00331241 | Glutathione S-transfer   | Gsta3;Gstyc               | T68   | 2           | 4             | LVQTKAILNYIASKYNYL  | (ca)LVQTK(ph)KAILNYI  | LVQTK(1)KAILNY(0.886)                                          | NEK6                   | 1.7                       | 0.015555       | Up         | Yes                     |
| 30  | IPI00331241 | Glutathione S-transfer   | Gsta3;Gstyc               | Y74   | 2           | 10            | LVQTKAILNYIASKYNYL  | (ca)LVQTK(ph)KAILNYI  | LVQTK(1)KAILNY(0.957)                                          | IAS(0.033)KY(0.002)NLY | 1.7                       | 0.015555       | Up         | Yes                     |
| 198 | IPI00313817 | Hepatoma-derived gro     | Hdgf;Tdrn1                | S165  | 1           | 8             | AGDVLDSPKRPK        | AGDVLDS(ph)PKRPK      | AGDVLDS(1)PKRPK                                                | CDK2                   | 1.1                       | 0.36576        | No         |                         |
| 110 | IPI00331612 | High mobility group pr   | Hmga2;Hmgic               | S100  | 1           | 10            | KPAQETEETSSQESAED   | KPAQETEETSS(ph)SQE    | KPAQETE(0.003)EET(0.1)                                         | CK2                    | 0.9                       | 0.20442        | No         |                         |
| 337 | IPI00331612 | High mobility group pr   | Hmga2;Hmgic               | S101  | 1           | 11            | KPAQETEETSSQESAED   | KPAQETEETSS(ph)SQE    | KPAQETEET(0.001)S(0.245)S(0.377)QES(0.377)                     | AED                    |                           |                | No         |                         |
| 212 | IPI00331612 | High mobility group pr   | Hmga2;Hmgic               | S104  | 1           | 14            | KPAQETEETSSQESAED   | KPAQETEETSSQES(ph)    | KPAQETEETSSQES(1)A                                             | CK2                    | 1.0                       | 0.40118        | Yes        |                         |
| 338 | IPI00338745 | Non-histone chromoso     | Hmgn1;Hmg-14;Hmg14        | S584  | 1           | 25            | GKQADVADQQTTELP     | GKQADVADQQTTELP       | GKQADVADQQT(0.031)                                             | CK1                    |                           |                | No         |                         |
| 193 | IPI00338745 | Non-histone chromoso     | Hmgn1;Hmg-14;Hmg14        | S587  | 1           | 26            | QADVADQQTTELP       | QADVADQQTTELP         | QADVADQQTTELP                                                  | CK2                    | 1.0                       | 0.36042        | Yes        |                         |
| 339 | IPI00338745 | Non-histone chromoso     | Hmgn1;Hmg-14;Hmg14        | S595  | 1           | 34            | QADVADQQTTELP       | QADVADQQTTELP         | QADVADQQTTELP                                                  | CK2                    |                           |                | No         |                         |
| 16  | IPI00338745 | Non-histone chromoso     | Hmgn1;Hmg-14;Hmg14        | T80   | 1           | 21            | GKQADVADQQTTELP     | GKQADVADQQTTELP       | GKQADVADQQTTELP                                                | CK2                    |                           |                | No         |                         |
| 149 | IPI00853914 | Heterogeneous nuclear    | Hnrnpa2b1;Hnrpa2b1;       | S720  | 1           | 21            | GFGDGYNGYGGGPGGG    | GFGDGYNGYGGGPGGG      | GFGDGYNGYGGGPGGG                                               | CK2                    | 0.9                       | 0.28897        | Yes        |                         |
| 106 | IPI00853914 | Heterogeneous nuclear    | Hnrnpa2b1;Hnrpa2b1;       | Y723  | 1           | 24            | GFGDGYNGYGGGPGGG    | GFGDGYNGYGGGPGGG      | GFGDGY(0.128)NGY(0.068)GGGPGGGNFGGS(0.0)                       | CK2                    | 0.9                       | 0.20032        | Yes        |                         |
| 329 | IPI00269661 | Heterogeneous nuclear    | Hnrnpa3;Hnrpa3;Hnrn       | S356  | 1           | 1             | SSGSPYGGYGGGSGGSG   | S(ph)SSGSPYGGYGGSG    | S(0.424)S(0.273)GS(0.273)PY(0.028)GGY(0.003)SSGSGGSGY          |                        |                           |                | Yes        |                         |
| 253 | IPI00269661 | Heterogeneous nuclear    | Hnrnpa3;Hnrpa3;Hnrn       | S359  | 1           | 4             | SSGSPYGGYGGGSGGSG   | SSGS(ph)PYGGYGGSG     | S(0.094)S(0.051)GS(0.8)CK1                                     |                        | 1.1                       | 0.44856        | Yes        |                         |
| 268 | IPI00330958 | Heterogeneous nuclear    | Hnrnpd;Auf1;Hnrpd;Hr      | S82   | 1           | 15            | IDASKNEEDEGHNSNSP   | IDASKNEEDEGHNSNS(p)   | IDASKNEEDEGHNS(0.005)INS(0.928)S(0.066)PR                      |                        | 1.0                       | 0.46332        | Yes        |                         |
| 322 | IPI00224575 | Heterogeneous nuclear    | Hnrnpk;Hnrpk;Hnrnpk;      | S116  | 1           | 13            | IIPTEEGQLQSPATSQ    | IIPTEEGQLQPS(ph)PT    | IIPTEEGQLQPS(0.444)PT(0.444)AT(0.092)S(0.02)QLPLESDAVECLNYQHYK |                        |                           |                | Yes        |                         |
| 393 | IPI00224575 | Heterogeneous nuclear    | Hnrnpk;Hnrpk;Hnrnpk;      | T118  | 1           | 15            | IIPTEEGQLQSPATSQ    | IIPTEEGQLQPS(ph)PT    | IIPTEEGQLQPS(0.444)P                                           | FHA KAPP               |                           |                | Yes        |                         |
| 135 | IPI00224575 | Heterogeneous nuclear    | Hnrnpk;Hnrpk;Hnrnpk;      | S284  | 1           | 6             | DYDDMSR             | DYDDMS(ph)PR          | DYDDMS(1)PR                                                    | CDK2                   | 0.9                       | 0.25642        | Yes        |                         |
| 159 | IPI00554929 | Heat shock protein HSP   | Hsp90ab1;Hsp84;Hsp8       | S255  | 1           | 6             | IEDVGSDEEDDSGKDK    | IEDVGS(ph)DEEDDSG     | IEDVGS(1)DEEDDSGDK                                             | CK2                    | 1.2                       | 0.30825        | Yes        |                         |
| 78  | IPI00331556 | Heat shock 70 kDa prot   | Hspa4;Apg2;Hsp110         | S76   | 1           | 3             | AFSDPFVFAEK         | AFS(ph)DPFVFAEK       | AFS(1)DPFVFAEK                                                 | CAMK2                  | 1.4                       | 0.1278         | Yes        |                         |
| 202 | IPI00463909 | E3 ubiquitin-protein lig | Huwe1;Kiaa0312;Ureb       | S1907 | 1           | 6             | GSGTASDDEFENLR      | GSGTAS(ph)DDEFENLR    | GS(0.001)GT(0.006)AS                                           | CK2                    | 1.1                       | 0.37789        | Yes        |                         |
| 150 | IPI00332321 | Interferon-gamma rece    | Ifngr1;Ifngr;Ifngr1;Ifngr | T373  | 1           | 18            | ALEAGGSTSAMTPDSP    | ALEAGGSTSAMTPDSP      | ALEAGGSTSAMTPDSP                                               | WW GroupIV             | 0.9                       | 0.28961        | Yes        |                         |
| 392 | IPI00332321 | Interferon-gamma rece    | Ifngr1;Ifngr;Ifngr1;Ifngr | T375  | 1           | 20            | ALEAGGSTSAMTPDSP    | ALEAGGSTSAMTPDSP      | ALEAGGSTSAMTPDS(0.012)PPT(0.494)PT(0.494)QRR                   |                        |                           |                | No         |                         |
| 84  | IPI00131056 | Insulin-like growth fact | Igf2bp1;Vickz1            | S181  | 1           | 3             | QGS(ph)PVAAGAPAK    | QGS(ph)PVAAGAPAK      | QGS(1)PVAAGAPAK                                                | CAMK2                  | 0.9                       | 0.14192        | Yes        |                         |
| 269 | IPI00761863 | Insulin-like growth fact | Igf2bp2;Imp2;Vickz2;I     | S164  | 1           | 13            | ISYIPDEEVSSPPPHR    | ISYIPDEEVSSPP(ph)PP   | ISYIPDEEVSSPP(0.002)S(0.0)                                     | CK1                    | 1.0                       | 0.46408        | Yes        |                         |
| 282 | IPI00331315 | Insulin-like growth fact | Igf2bp3;Vickz3            | S165  | 1           | 15            | VAVYIPDEETAQQNPSPQ  | VAVYIPDEETAQQNP(S)P   | VAVYIPDEETAQQNP(S)1)PQLR                                       |                        | 1.0                       | 0.48364        | Yes        |                         |
| 324 | IPI00229522 | Interleukin-28 receptor  | Il28a;Ifnlr1              | S17   | 1           | 11            | WAPLFLFLQSLALGR     | WAPLFLFLQSL(ph)ALG    | WAPLFLFLQSL(1)ALGR                                             | NEK6                   |                           |                | No         |                         |
| 180 | IPI00319956 | Protein IMPACT;Imprin    | Impact                    | S137  | 1           | 9             | KTEEVESVEEEDPILEPH  | KTEEVESVEEEDPI        | KT(0.005)EEVES(0.995)EEDPILEHPENPVK                            |                        | 1.0                       | 0.34157        | Yes        |                         |
| 276 | IPI00410790 | Iroquois-class homeod    | Irx1;Irx1a;Irx1           | S267  | 1           | 4             | DQSSS(ph)PLSAEATLK  | DQSSS(ph)PLSAEATLK    | DQSSS(0.085)S(0.83)PLS(                                        | Polo box               | 1.0                       | 0.47597        | Yes        |                         |
| 74  | IPI00122143 | Tyrosine-protein kinase  | Lak2                      | S523  | 1           | 10            | TNGISDVQISPTLQR     | TNGISDVQIS(ph)PTLQ    | TNGISDVQIS(0.992)PT(0.008)LQR                                  |                        | 0.9                       | 0.11977        | Yes        |                         |
| 360 | IPI00421009 | Kinesin-like protein KIF | Kifc3                     | S15   | 1           | 9             | TWNLGATPSLR         | TWNLGATPS(ph)LR       | TWNLGAT(0.01)PS(0.99)LR                                        |                        |                           |                | No         |                         |
| 312 | IPI00653162 | Klotho;Klotho peptide;   | Kl;Kl                     | S485  | 1           | 10            | RGLFYVDLSDQDK       | (ca)RGLFYVDLSDQDK     | RGLFYVDLSDQDK                                                  |                        |                           |                | Yes        |                         |
| 421 | IPI00317465 | Kinetochore-associated   | Knl2;Kiaa1903;M18bp1      | Y107  | 1           | 5             | NEMIVISPKGIFKFR     | (ca)NEMIVIS(ph)ESPK   | NEMIVIS(0.989)ES(0.011)                                        | ABL                    |                           |                | No         |                         |
| 249 | IPI00230429 | Importin subunit alpha   | Kpna3;Qip2;Kpna3          | S60   | 1           | 11            | NVPOEESLSDVDADDF    | NVPOEESLSDS(ph)DV     | NVPOEESLSDS(1)DVDA                                             | NEK6                   | 1.1                       | 0.44797        | Yes        |                         |
| 186 | IPI00134106 | Protein KTI12 homolog    | Kti12                     | S157  | 1           | 3             | ATSPVANGVGLAAVSK    | AT(ph)SPVANGVGLAA     | AT(0.5)S(0.5)PVANGGV                                           | CAMK2                  | 1.0                       | 0.34946        | Yes        |                         |
| 187 | IPI00134106 | Protein KTI12 homolog    | Kti12                     | T156  | 1           | 2             | ATSPVANGVGLAAVSK    | AT(ph)SPVANGVGLAA     | AT(0.5)S(0.5)PVANGGV                                           | PKA                    | 1.0                       | 0.34946        | No         |                         |
| 286 | IPI00929786 | La-related protein 1;La  | Larp1;Kiaa0731;Larp       | T626  | 1           | 7             | ILIVTQTPPYMR        | ILIVTQ(ph)PPYMR       | ILIVTQ(1)PPYMR                                                 |                        | 1.0                       | 0.49011        | Yes        |                         |
| 104 | IPI00474486 | RNA polymerase-assoc     | Leo1;Gm185                | S659  | 1           | 5             | KYVISDEEEEDD        | KYVIS(ph)DEEEEDD      | KYVIS(1)DEEEEDD                                                | CK2                    | 0.9                       | 0.19202        | Yes        |                         |
| 123 | IPI00112339 | LIM domain and actin     | Lima1;D15Erd366e;Ep       | S488  | 1           | 22            | SDNEETLGRPAQPPNAG   | SDNEETLGRPAQPPNA      | SDNEETLGRPAQPPNAG                                              | WW GroupIV             | 1.2                       | 0.23083        | Yes        |                         |

| No  | IPI Numbers | Protein Names           | Gene Names               | pAA   | Number of P | Position in p | Peptide Sequence    | Phospho (STY) Probabi | Modified Sequence          | Best Motif             | Ratio <sup>1</sup> of Phd      | Ratio Signific | Up-/Down-r | Phosphosites Localized? |
|-----|-------------|-------------------------|--------------------------|-------|-------------|---------------|---------------------|-----------------------|----------------------------|------------------------|--------------------------------|----------------|------------|-------------------------|
| 182 | IPI00620256 | Lamin-A/C               | Lmna;Lmn1                | S637  | 1           | 9             | SVGGSGGGSGFDNLVTR   | SVGGSGGGG(ph)FGDN     | S(0.003)VGGS(0.015)G       | CK1                    | 1.1                            | 0.3454         |            | Yes                     |
| 238 | IPI00620256 | Lamin-A/C;Lamin-A/C;L   | Lmna;Lmn1;Lmna;Lmn       | S390  | 1           | 4             | LRLSPSPTSQR         | (ca)LRLS(ph)PSPTSQR   | LRLS(0.949)PS(0.05)PTS     | PKA                    | 1.1                            | 0.43499        |            | No                      |
| 371 | IPI00620256 | Lamin-A/C;Lamin-A/C;L   | Lmna;Lmn1;Lmna;Lmn       | S392  | 1           | 6             | LRLSPSPTSQR         | LRLS(ph)PSPTSQR_      | LRLS(0.483)PS(0.483)P      | NEK6                   |                                |                |            | Yes                     |
| 372 | IPI00620256 | Lamin-A/C;Lamin-A/C;L   | Lmna;Lmn1;Lmna;Lmn       | S395  | 1           | 9             | LRLSPSPTSQR         | LRLSPSPTS(ph)QR_      | LRLS(0.105)PS(0.018)P      | CK1                    |                                |                |            | Yes                     |
| 168 | IPI00676243 | Microtubule-associated  | Map1a;Mtap1;Mtap1a       | S2027 | 1           | 9             | VPSAPGQESVPVPTDK    | VPSAPGQES(ph)VPVD     | VPSAPGQES(1)VPVPTDK        |                        | 1.1                            | 0.32584        |            | Yes                     |
| 417 | IPI00124786 | Mitogen-activated prot  | Map3k14;Nik              | Y671  | 1           | 16            | ALQEVGGLKSPWKGEYK   | ALQEVGGLKSPWKGEYK     | ALQEVGGLKS(0.001)PWKG      | Y(0.999)K              |                                |                |            | No                      |
| 287 | IPI00408119 | Microtubule-associated  | Map4;Mtap4;Map4;M        | S506  | 1           | 11            | VAEFNNVTPLEEEVTSV   | VAEFNNVTPLS(ph)EEE    | VAEFNNVT(0.158)PLS(D       | CK2                    | 1.0                            | 0.49348        |            | No                      |
| 92  | IPI00408119 | Microtubule-associated  | Map4;Mtap4;Map4;M        | S517  | 1           | 22            | VAEFNNVTPLEEEVTSV   | VAEFNNVTPLEEEVTS      | VAEFNNVTPLEEEVTS(0.001     | VKDMS(0.932)PS(        | 1.0                            | 0.16426        |            | Yes                     |
| 240 | IPI00408119 | Microtubule-associated  | Map4;Mtap4;Map4;M        | S667  | 1           | 21            | AAVGVGTNDITTPPNKEI  | AAVGVGTNDITTPPNKE     | AAVGVGTNDITTPPNKE(WW       | GroupIV                | 1.1                            | 0.43692        |            | Yes                     |
| 355 | IPI00408119 | Microtubule-associated  | Map4;Mtap4;Map4;M        | S785  | 1           | 3             | ATSPSTLVSTGSPSSR    | AT(ph)SPSTLVSTGSPSS   | AT(0.498)S(0.498)PS(0.     | PKD                    |                                |                |            | No                      |
| 403 | IPI00408119 | Microtubule-associated  | Map4;Mtap4;Map4;M        | T784  | 1           | 2             | ATSPSTLVSTGSPSSR    | AT(ph)SPSTLVSTGSPSS   | AT(0.498)S(0.498)PS(0.     | CK1                    |                                |                |            | No                      |
| 330 | IPI00281011 | MARCKS-related protei   | Marcks1;Mlp;Mrp          | S182  | 1           | 16            | EGDTEEEAGPQAAEPSTI  | EGDTEEEAGPQAAEPSTI    | EGDTEEEAGPQAAEPSTI(0.425   | JT(0.425)PS(0.126)GPES | (0.014)GPT(0.005)PAS(0.005)AEQ |                |            | Yes                     |
| 396 | IPI00281011 | MARCKS-related protei   | Marcks1;Mlp;Mrp          | T183  | 1           | 17            | EGDTEEEAGPQAAEPSTI  | EGDTEEEAGPQAAEPSTI    | EGDTEEEAGPQAAEPSTI(WW      | GroupIV                |                                |                |            | No                      |
| 164 | IPI00453826 | Matrin-3                | Matr3                    | S596  | 1           | 1             | SYPDGKESPSDKK       | S(ph)YSPDGKESPSDKK    | S(0.591)Y(0.372)S(0.03     | PKA                    | 1.2                            | 0.31959        |            | Yes                     |
| 88  | IPI00453826 | Matrin-3                | Matr3                    | S598  | 1           | 3             | SYPDGKESPSDKK       | SYS(ph)PDGKESPSDKK    | SY(0.001)S(0.999)PDGK      | PKA/AKT                | 0.9                            | 0.15631        |            | No                      |
| 220 | IPI00323820 | DNA replication licensi | Mcm2;Bm28;Ccd1;Kia       | S139  | 1           | 6             | GLLYDSSEDEERPAR     | GLLYDS(ph)SEDEERPAR   | GLLY(0.004)DS(0.936)S      | CK2                    | 1.0                            | 0.41576        |            | No                      |
| 290 | IPI00323820 | DNA replication licensi | Mcm2;Bm28;Ccd1;Kia       | S27   | 1           | 8             | ISDPLTSSPGR         | ISDPLTSS(ph)JGDR      | ISDPLTS(0.002)S(0.998)     | Polo box               | 1.0                            | 0.49617        |            | Yes                     |
| 141 | IPI00123881 | DNA replication licensi | Mcm6;Mcm6;Mis5           | S689  | 1           | 31            | VETPVNLDQEEIQQME    | VETPVNLDQEEIQQME      | VETPVNLDQEEIQQMET(0.006    | DEGGGGVGNH             | 0.9                            | 0.27487        |            | Yes                     |
| 134 | IPI00753701 | Mediator of DNA dama    | Mdc1;Kia0170             | S168  | 1           | 7             | VLLAADSEEEGDFPSGR   | VLLAADSEEEGDFPSGR     | VLLAADS(1)EEEGDFPSG        | CK2                    | 0.9                            | 0.25613        |            | No                      |
| 34  | IPI00222037 | Melanoma inhibitory a   | Mia3;Kia0268;Mia3;K      | S1916 | 1           | 15            | DSLPSGPRREEAKPASPS  | DSLPSGPRREEAKPAS      | DSLPSGPRREEAKPAS(0.9       | WW GroupIV             | 1.7                            | 0.02448        | Up         | No                      |
| 215 | IPI00116372 | Myeloid leukemia fact   | Mlf2                     | S237  | 1           | 9             | LAIQGPEDSPSR        | LAIQGPEDS(ph)PSR      | LAIQGPEDS(0.988)PS(0.      | CDK2                   | 1.1                            | 0.40472        |            | Yes                     |
| 194 | IPI00757871 | MLI2 protein            | MLI2                     | S4475 | 1           | 3             | ALSPVPIPIPR         | ALS(ph)PVPIPIPR       | ALS(1)PVPIPIPR             | CAMK2                  | 1.1                            | 0.36111        |            | Yes                     |
| 412 | IPI00858168 | Mitochondrial ribosom   | Mrpl39;RP24-120H1.1      | T308  | 1           | 4             | AQFTIWDKLVRSR       | (ca)AQFT(ph)IWDKLVRS  | AQFT(1)IWDKLVRSR           | FHA1 Rad53p            |                                |                |            | No                      |
| 382 | IPI00882333 | Putative uncharacterize | Ms4a15                   | S13   | 4           | 13            | MMCECGSAEAEAGSQQP   | MMCECGS(ph)AEAG       | MMCECGS(0.592)AEAGS(0.554) | QQPVQPPWQAGS(0.308)    | LNT(0.308)MS(0.308)APPAS       | Yes            |            | Yes                     |
| 383 | IPI00882333 | Putative uncharacterize | Ms4a15                   | S25   | 4           | 25            | MMCECGSAEAEAGSQQP   | MMCECGS(ph)AEAG       | MMCECGS(0.592)AEAGS(0.554) | QQPVQPPWQAGS(0.308)    | LNT(0.308)MS(0.308)APPAS       | No             |            | No                      |
| 384 | IPI00882333 | Putative uncharacterize | Ms4a15                   | S30   | 4           | 30            | MMCECGSAEAEAGSQQP   | MMCECGS(ph)AEAG       | MMCECGS(0.592)AEAGS(0.554) | QQPVQPPWQAGS(0.308)    | LNT(0.308)MS(0.308)APPAS       | No             |            | No                      |
| 385 | IPI00882333 | Putative uncharacterize | Ms4a15                   | S35   | 4           | 35            | MMCECGSAEAEAGSQQP   | MMCECGS(ph)AEAG       | MMCECGS(0.592)AEAGS(0.554) | QQPVQPPWQAGS(0.308)    | LNT(0.308)MS(0.308)APPAS       | Yes            |            | Yes                     |
| 386 | IPI00882333 | Putative uncharacterize | Ms4a15                   | S45   | 4           | 45            | MMCECGSAEAEAGSQQP   | MMCECGS(ph)AEAG       | MMCECGS(0.592)AEAGS(0.554) | QQPVQPPWQAGS(0.308)    | LNT(0.308)MS(0.308)APPAS       | No             |            | No                      |
| 387 | IPI00882333 | Putative uncharacterize | Ms4a15                   | S48   | 4           | 48            | MMCECGSAEAEAGSQQP   | MMCECGS(ph)AEAG       | MMCECGS(0.592)AEAG         | CK1                    |                                |                |            | No                      |
| 388 | IPI00882333 | Putative uncharacterize | Ms4a15                   | S60   | 4           | 60            | MMCECGSAEAEAGSQQP   | MMCECGS(ph)AEAG       | MMCECGS(0.592)AEAG         | NEK6                   |                                |                |            | No                      |
| 381 | IPI00882333 | Putative uncharacterize | Ms4a15                   | S7    | 4           | 7             | MMCECGSAEAEAGSQQP   | MMCECGS(ph)AEAG       | MMCECGS(0.592)AEAGS(0.554) | QQPVQPPWQAGS(0.308)    | LNT(0.308)MS(0.308)APPAS       | No             |            | No                      |
| 38  | IPI00896700 | Mtap1b protein;Microt   | Mtap1b;Map1b;Mtap1       | S1793 | 1           | 7             | ESSPLYSYPGFSDSTSAK  | ESSPLYS(ph)PGFSDST    | ES(0.032)S(0.023)PLY(D     | GSK3                   | 1.6                            | 0.035943       | Up         | Yes                     |
| 49  | IPI00896700 | Mtap1b protein;Microt   | Mtap1b;Map1b;Mtap1       | T1945 | 1           | 4             | TRTRPEEGGYSYSEIK    | TRTR(ph)PEEGGYSYSEI   | TT(0.001)RT(0.999)PEE      | CK2                    | 1.5                            | 0.051147       |            | Yes                     |
| 40  | IPI00128196 | Myotubularin-related p  | Mtmr2;Mtmr2;RP23-1       | S126  | 1           | 18            | SASAISSDSISADNFSPI  | SASAISSDSISADNFS      | SASAISSDSISADNFS(0.999)    | PDLR                   | 0.8                            | 0.037036       | Down       | No                      |
| 43  | IPI00226263 | Matrix-remodeling-ass   | Mxra7;Tmap1;Mxra7;R      | S79   | 1           | 7             | VAEPEESEAEPAEAKC    | VAEPEES(ph)EEPEPAE    | VAEPEES(1)EAEEPAEAKC       | CK2                    | 0.8                            | 0.039173       | Down       | No                      |
| 158 | IPI00123181 | Myosin-9;Myosin heav    | Myl9                     | S1943 | 1           | 7             | KGTGDCSDEEVDGKADG   | KGTGDCS(ph)DEEVDG     | KGTGDCS(1)DEEVDGKA         | CK2                    | 1.0                            | 0.30824        |            | No                      |
| 139 | IPI00123181 | Myosin-9;Myosin heav    | Myl9                     | T1939 | 1           | 3             | KGTGDCSDEEVDGKADG   | KGT(ph)GDCSDEEVDG     | KGT(0.5)GDCS(0.5)DEE       | PKA                    | 0.9                            | 0.26527        |            | Yes                     |
| 121 | IPI00849670 | Myof protein;Myoferli   | Myof;Myof;Frl13;Kia      | S175  | 1           | 7             | GPSGTVSEAEQLAR      | GPSGTVSEAEQLAR        | GPSGTV(0.002)VS(0.998)     | CK1                    | 0.9                            | 0.22734        |            | Yes                     |
| 275 | IPI00896637 | Nek1 protein;Nek1 pro   | Nek1;Nek1;Nek1           | S1069 | 1           | 3             | TCSLPDLK            | TCS(ph)LPDLK          | TCS(1)LPDLK                | CHK1                   | 1.0                            | 0.47533        |            | No                      |
| 239 | IPI00844655 | Serine/threonine-prote  | Nek10;Gm282              | S448  | 1           | 4             | FLFSMER             | (ca)FLFS(ph)MER       | FLFS(1)MER                 |                        | 1.0                            | 0.43541        |            | Yes                     |
| 348 | IPI00400168 | Nexilin;F-actin binding | Nexn                     | S281  | 1           | 1             | SMVLDDDSPEYK        | S(ph)MVLDDDSPEYK      | S(1)MVLDDDSPEYK            | PKA                    | 0.7                            |                |            | No                      |
| 23  | IPI00131415 | Nuclear factor 1 A-type | Nfia;Nfia;Nfia;Nfia;Nfia | S310  | 1           | 8             | SVEDEMDSPGEEPPFYG   | SVEDEMDS(ph)PGEEP     | SVEDEMDS(1)PGEEP           | CK2                    | 0.7                            | 0.0038577      | Down       | Yes                     |
| 229 | IPI00421052 | Nipped-B-like protein;  | Nipbl;Nipbl              | S2652 | 1           | 10            | AITSLGGGSPK         | AITSLGGGS(ph)PK       | AITSLGGGS(1)PK             | CDK1                   | 1.1                            | 0.42771        |            | Yes                     |
| 271 | IPI00720058 | MKIAA0035 protein;Pu    | Nolc1;MKIAA0035;Nolc     | S563  | 1           | 5             | AAKESEEEEEETEKE     | AAKES(ph)EEEEEEETE    | AAKES(1)EEEEEEETE          | CK2                    | 1.0                            | 0.46441        |            | Yes                     |
| 258 | IPI00720058 | MKIAA0035 protein;Pu    | Nolc1;MKIAA0035;Nolc     | S701  | 1           | 15            | GGJSISQVNSVKFDS     | GGJSISQVNSVKFDS       | GGJSISQVNSVKFDS(1)E        |                        | 1.0                            | 0.45267        |            | Yes                     |
| 231 | IPI00318048 | Nucleolar protein 56;N  | Nop56;Nol5a;Nol5a;RP     | S536  | 1           | 9             | SSPKEEVASEPEEAASPT  | SSPKEEVAS(ph)EPEEA    | SSPKEEVAS(0.999)EPEE       | CK2                    | 1.1                            | 0.42806        |            | Yes                     |
| 332 | IPI00318048 | Nucleolar protein 56;N  | Nop56;Nol5a;Nol5a;RP     | S543  | 1           | 12            | EEVASEPEEAASPTPK    | EEVAS(ph)EPEEAASPT    | EEVAS(0.452)EPEEAAS(0.452) | PT(0.08)T(0.017)PK     |                                |                |            | No                      |
| 319 | IPI00129186 | Epididymal secretory p  | Npc2                     | S108  | 1           | 3             | VYSYLNK             | VYSYLNK               | VY(0.002)S(0.499)Y(0.499)  | LNK                    |                                |                |            | No                      |
| 418 | IPI00129186 | Epididymal secretory p  | Npc2                     | Y109  | 1           | 4             | VYSYLNK             | VYSYLNK               | VY(0.002)S(0.499)Y(0.499)  | LNK                    |                                |                |            | Yes                     |
| 1   | IPI00125992 | Neuronal pentraxin-1;   | Nptx1                    | S203  | 2           | 5             | AKIESALTSLHQR       | AKIES(ph)ALTS(ph)LH   | AKIES(0.911)ALT(0.178)     | GSK3                   | 0.04                           | 5.81E-95       | Down       | No                      |
| 2   | IPI00125992 | Neuronal pentraxin-1;   | Nptx1                    | S207  | 2           | 9             | AKIESALTSLHQR       | AKIES(ph)ALTS(ph)LH   | AKIES(0.911)ALT(0.178)     | CK1                    | 0.04                           | 5.81E-95       | Down       | Yes                     |
| 314 | IPI00856881 | Glucocorticoid recepto  | Nr3c1;Nr3c1;Gr1;Gr1;N    | S283  | 1           | 10            | IQDTGDTILSSPSSVALPQ | IQDTGDTILS(ph)SPSS    | IQDT(0.001)GDT(0.001)      | GSK3                   |                                |                |            | No                      |
| 315 | IPI00856881 | Glucocorticoid recepto  | Nr3c1;Nr3c1;Gr1;Gr1;N    | S284  | 1           | 11            | IQDTGDTILSSPSSVALPQ | IQDTGDTILS(ph)SPSS    | IQDT(0.001)GDT(0.001)      | Polo box               |                                |                |            | No                      |
| 234 | IPI00664246 | Putative uncharacterize | Nrbp1;Nrbp;Nrbp1;Ma      | T441  | 1           | 3             | TPTPEPAEVETR        | TPT(ph)PEPAEVETR      | T(0.103)PT(0.897)PEPAE     | VETR                   | 1.1                            | 0.43322        |            | Yes                     |
| 144 | IPI00132314 | Nucleobindin-1;CALNU    | Nucb1;Nuc;Nucb;Nucb      | S368  | 1           | 5             | AQRLSQETEALGR       | AQRLS(ph)QETEALGR     | AQRLS(0.991)QET(0.00)      | PKA                    | 0.9                            | 0.28145        |            | Yes                     |
| 94  | IPI00341869 | Nuclear ubiquitous cas  | Nucks1;Nucks             | S19   | 1           | 10            | VVDYSQFQESDDADEDY   | VVDYSQFQES(ph)DDA     | VVDYSQFQES(1)DDADEDY       | GR                     | 0.9                            | 0.16696        |            | Yes                     |
| 423 | IPI00341869 | Nuclear ubiquitous cas  | Nucks1;Nucks             | Y26   | 1           | 17            | VVDYSQFQESDDADEDY   | VVDYSQFQESDDADEDY     | VVDY(0.133)S(0.134)Q       | SRC                    |                                |                |            | No                      |
| 85  | IPI00263048 | Putative uncharacterize | Numa1                    | S1739 | 1           | 14            | TQPDGTVSPGEPASIPQ   | TQPDGTVSPGEPAS(ph)    | TQPDGTVSPGEPAS(1)P         | WW GroupIV             | 1.3                            | 0.1454         |            | Yes                     |
| 288 | IPI00918049 | Oxysterol-binding prot  | Osbp11                   | S192  | 1           | 10            | SFSLASSGNSPISQR     | SFSLASSGNS(ph)PISQ    | SFSLASSGNS(0.001)GNS(0.    | CK1                    | 1.0                            | 0.494          |            | Yes                     |
| 79  | IPI00116202 | PAXIP1-associated prot  | Pa1                      | S236  | 1           | 14            | DLFSLDSEGSPSPPLR    | DLFSLDSEGSPS(ph)      | DLFSLDSEGSPS(0.102)P       | WW GroupIV             | 0.9                            | 0.1285         |            | Yes                     |
| 206 | IPI00828325 | Pericentriolar material | Pcm1;Pcm1                | S65   | 1           | 6             | VTNAISPSSPGVGR      | VTNAIS(ph)PESSPGVGR   | VTNAIS(1)PESSPGVGR         | GSK3                   | 1.0                            | 0.38966        |            | Yes                     |
| 318 | IPI00828325 | Pericentriolar material | Pcm1;Pcm1                | S68   | 1           | 9             | VTNAISPSSPGVGR      | VTNAIS(ph)PESSPGVGR   | VT(0.001)NAIS(0.49)PE      | CK1                    |                                |                |            | Yes                     |
| 112 | IPI00337893 | Pyruvate dehydrogenas   | Pdha1;Pdha-1             | S232  | 1           | 6             | YMGMTSVR            | YMGMTS(ph)VER         | YMGMT(0.06)S(0.94)VER      |                        | 0.9                            | 0.20874        |            | Yes                     |
| 320 | IPI00153375 | PDZ and LIM domain p    | Pdlim2;Pdlim2            | S199  | 1           | 5             | VLLHSPGRPSSPR       | VLLHS(ph)PGRPSSPR     | VLLHS(0.333)PGRPS(0.       | CDK2                   |                                |                |            | Yes                     |
| 321 | IPI00153375 | PDZ and LIM domain p    | Pdlim2;Pdlim2            | S204  | 1           | 10            | VLLHSPGRPSSPR       | VLLHS(ph)PGRPSSPR     | VLLHS(0.333)PGRPS(0.       | PKA                    |                                |                |            | Yes                     |
| 197 | IPI00153375 | PDZ and LIM domain p    | Pdlim2;Pdlim2            | S205  | 1           | 11            | VLLHSPGRPSSPR       | VLLHSPGRPS(ph)PR      | VLLHSPGRPS(0.009)S(0.      | PKC                    | 1.0                            | 0.36413        |            | Yes                     |

| No  | IPI Numbers | Protein Names            | Gene Names                 | pAA   | Number of | Position in p | Peptide Sequence    | Phospho (STY) Probabi | Modified Sequence                                                                | Best Motif  | Ratio <sup>1</sup> of Phd | Ratio Signifid | Up-/Down-r | Phosphosites Localized? |
|-----|-------------|--------------------------|----------------------------|-------|-----------|---------------|---------------------|-----------------------|----------------------------------------------------------------------------------|-------------|---------------------------|----------------|------------|-------------------------|
| 254 | IPI00845638 | Sister chromatid cohes   | Pds5b;Aprin;As3;Kiaa0      | S1358 | 1         | 3             | AESPETAVESTQSTPKQ   | AES(ph)PETAVESTQ      | AES(1)PETAVESTQSTPK                                                              | CAMK2       | 1.1                       | 0.44892        |            | Yes                     |
| 77  | IPI00856504 | Pyridoxal-dependent d    | Pdxcd1;Pdxcd1;Pdxcd1       | T6877 | 1         | 7             | VQGTGVTPTPLGTR      | VQGTGVT(ph)PPPTPL     | VQGT(0.01)GVT(0.99)PPPTPLGTR                                                     |             | 1.4                       | 0.12541        |            | Yes                     |
| 41  | IPI00321597 | Proline-, glutamic acid- | Pelp1;Mnar                 | T751  | 1         | 14            | AGSGEDPVLAPSGTPPP   | AGSGEDPVLAPSGT(ph)    | AGSGEDPVLAPSG(0.003)GT(0.996)PPPS(0.001)PP                                       |             | 0.8                       | 0.038607       | Down       | No                      |
| 179 | IPI00319973 | Membrane-associated      | Pgrmc1;Pgrmc               | S181  | 1         | 12            | LLKEGEEPTVYSDEEPEK  | LLKEGEEPTVYS(ph)DD    | LLKEGEEPTVYS(1)DDEE                                                              | CK2         | 1.0                       | 0.34071        |            | Yes                     |
| 397 | IPI00319973 | Membrane-associated      | Pgrmc1;Pgrmc               | T178  | 1         | 9             | LLKEGEEPTVYSDEEPEK  | LLKEGEEPT(ph)YSSD     | LLKEGEEPT(0.331)VY(0                                                             | PLK1        |                           |                |            | No                      |
| 422 | IPI00319973 | Membrane-associated      | Pgrmc1;Pgrmc               | Y180  | 1         | 11            | LLKEGEEPTVYSDEEPEK  | LLKEGEEPT(ph)YSSD     | LLKEGEEPT(0.331)VY(0.331)DDEEPEK(0.006)AR                                        |             |                           |                |            | Yes                     |
| 352 | IPI00648030 | Phosphatase and actin    | Phactr4;Kiaa4120;Phac      | S126  | 1         | 1             | SSSPVLVEEPEER       | S(ph)SSPVLVEEPEER     | S(0.423)S(0.288)S(0.28                                                           | CK1         |                           |                |            | No                      |
| 195 | IPI00648030 | Phosphatase and actin    | Phactr4;Kiaa4120;Phac      | S128  | 1         | 3             | SSSPVLVEEPEER       | SSS(ph)PVLVEEPEER     | S(0.006)S(0.003)S(0.99                                                           | Polo box    | 1.0                       | 0.36204        |            | No                      |
| 19  | IPI00121277 | Phosphatidylinositol 4-  | Pi4k2a                     | S460  | 1         | 1             | SASESYTQSFQSR       | S(ph)ASESYTQSFQSR     | S(0.642)AS(0.355)ES(0                                                            | CK2         | 2.3                       | 0.0004387      | Up         | No                      |
| 119 | IPI00474711 | Putative uncharacterize  | Pkn1;Pkn1;Pkn;Prk1;Pr      | S925  | 1         | 18            | TDVSNFDEEFTGEAPTLS  | TDVSNFDEEFTGEAPT(L    | TDVSNFDEEFTGEAPT(0                                                               | CDK2        | 0.9                       | 0.21843        |            | Yes                     |
| 408 | IPI00474711 | Putative uncharacterize  | Pkn1;Pkn1;Pkn;Prk1;Pr      | T781  | 1         | 1             | TSTFCGTPFLAPEVLDTI  | T(ph)STFCGTPFLAPEV    | T(0.379)S(0.287)T(0.287)FCGT(0.047)PEFLAPEVLDTSTVTR                              |             |                           |                |            | Yes                     |
| 44  | IPI00312414 | Serine/threonine-prote   | Pkn2;Prkcl2;Pkn2;Prkcl     | T957  | 1         | 20            | GREDSVNFDEEFTSEAPI  | GREDSVNFDEEFTSEAPI    | GREDSVNFDEEFTSEAPI                                                               | CDK2        | 1.6                       | 0.039879       | Up         | Yes                     |
| 367 | IPI00473693 | Plakophilin-4;Armadillo  | Pkp4;Armrp;Pkp4;Armr       | S958  | 1         | 5             | ALADSGGIEK          | ALADS(ph)GGIEK        | ALADS(1)GGIEK                                                                    | NEK6        |                           |                |            | No                      |
| 170 | IPI00400215 | Plectin-1;Plectin-6      | Plec1                      | S21   | 1         | 3             | TSSEDNLVLAVALR      | TSS(ph)EDNLVLAVALR    | T(0.083)S(0.035)S(0.88                                                           | PKA         | 1.1                       | 0.32949        |            | Yes                     |
| 47  | IPI00400215 | Plectin-1;Plectin-6      | Plec1                      | T19   | 1         | 1             | TSSEDNLVLAVALR      | T(ph)SSEDNLVLAVALR    | T(0.692)S(0.014)S(0.29                                                           | CK2         | 1.6                       | 0.047001       | Up         | Yes                     |
| 351 | IPI00400215 | Plectin-1;Plectin-6;Plec | Plec1;Plec1;Plec1;Plec1    | S4243 | 1         | 1             | SSSVGSSSYPISSAGPR   | (ca)S(ph)SSSVGSSSYPI  | S(0.266)S(0.219)S(0.21                                                           | PKA/AKT     |                           |                |            | Yes                     |
| 83  | IPI00400215 | Plectin-1;Plectin-6;Plec | Plec1;Plec1;Plec1;Plec1    | S4245 | 1         | 3             | SSSVGSSSYPISSAGPR   | SSS(ph)YVSSSVGSSSYPI  | S(0.087)S(0.04)S(0.873                                                           | PKA/AKT     | 1.3                       | 0.13901        |            | Yes                     |
| 9   | IPI00400215 | Plectin-1;Plectin-6;Plec | Plec1;Plec1;Plec1;Plec1    | S4472 | 1         | 4             | GYSPYSPVSGSGTAGSR   | (ca)GYSPY(ph)PYSVSGS  | GY(0.006)Y(0.006)S(0.988)PY(0.001)SVSGSGST                                       | 0.4         | 1.59E-10                  | Down           | Yes        |                         |
| 349 | IPI00400215 | Plectin-1;Plectin-6;Plec | Plec1;Plec1;Plec1;Plec1    | S4475 | 1         | 7             | GYSPYSPVSGSGTAGSR   | GYSPY(ph)SVSGSGST     | GY(0.006)PY(0.331)S                                                              | CK1         |                           |                |            | Yes                     |
| 350 | IPI00400215 | Plectin-1;Plectin-6;Plec | Plec1;Plec1;Plec1;Plec1    | S4477 | 1         | 9             | GYSPYSPVSGSGTAGSR   | GYSPY(ph)SVSGSGST     | GY(0.006)PY(0.331)S                                                              | GSK3        |                           |                |            | No                      |
| 399 | IPI00400215 | Plectin-1;Plectin-6;Plec | Plec1;Plec1;Plec1;Plec1    | T4261 | 1         | 1             | TQLASWSDPTEETGPVA   | T(ph)QLASWSDPTEET     | T(0.423)QLAS(0.288)W                                                             | FHA KAPP    |                           |                |            | Yes                     |
| 424 | IPI00400215 | Plectin-1;Plectin-6;Plec | Plec1;Plec1;Plec1;Plec1    | Y4470 | 1         | 2             | GYSPYSPVSGSGTAGSR   | (ca)GYSPYSPVSGSGS     | GY(0.135)Y(0.135)S(0.135)PY(0.135)S(0.135)VS(0.069)GS(0.069)GS(0.069)T(0.069)AGS | No          |                           |                |            | No                      |
| 425 | IPI00400215 | Plectin-1;Plectin-6;Plec | Plec1;Plec1;Plec1;Plec1    | Y4471 | 1         | 3             | GYSPYSPVSGSGTAGSR   | (ca)GYSPYSPVSGSGS     | GY(0.135)Y(0.135)S(0.135)PY(0.135)S(0.135)VS(0.069)GS(0.069)GS(0.069)T(0.069)AGS | No          |                           |                |            | No                      |
| 426 | IPI00400215 | Plectin-1;Plectin-6;Plec | Plec1;Plec1;Plec1;Plec1    | Y4474 | 1         | 6             | GYSPYSPVSGSGTAGSR   | GYSPY(ph)SVSGSGST     | GY(0.006)PY(0.331)S(0.331)VS(0.331)GSGTAGSR                                      |             |                           |                |            | Yes                     |
| 132 | IPI00403031 | Pleckstrin homology do   | Plekho2;Plekho1            | S395  | 1         | 3             | SSSLGDLR            | SSS(ph)LGDLR          | S(0.011)S(0.005)S(0.985                                                          | CAMK2       | 1.2                       | 0.24746        |            | Yes                     |
| 57  | IPI00896602 | Ppfi1 protein;Ppfi1 a    | Ppfi1;Ppfi1                | S717  | 1         | 17            | SMSSIPPYPASSLAGSPP  | SMSSIPPYPASSLAGS      | SMSSIPPYPASSLAGS(0                                                               | Polo box    | 0.8                       | 0.066111       |            | Yes                     |
| 368 | IPI00480372 | Liprin-beta-1;Protein ty | Ppfi1b;Ppfi1;Kiaa1230;Ppfi | S968  | 1         | 1             | SPSASITDEDSNV       | S(ph)SPSASITDEDSNV    | S(0.661)T(0.464)AS(0                                                             | GSK3        |                           |                |            | Yes                     |
| 369 | IPI00480372 | Liprin-beta-1;Protein ty | Ppfi1b;Ppfi1;Kiaa1230;Ppfi | S972  | 1         | 5             | SPSASITDEDSNV       | SPSAS(ph)TDEDSNV      | S(0.026)PS(0.12)AS(0                                                             | CK1         |                           |                |            | No                      |
| 413 | IPI00890946 | Protein phosphatase 2c   | ppm1m                      | T47   | 1         | 12            | FLRGSGLSPGATDASRR   | (ca)FLRGSGLSPGAT(ph)  | FLRGSGLS(0.085)S(0.085                                                           | FHA KAPP    |                           |                |            | Yes                     |
| 80  | IPI00230005 | cAMP-dependent prote     | Prkaca;Prkaca;Prkaca;P     | S539  | 1         | 21            | FKGPGDTSNFDDYEEEL   | FKGPGDTSNFDDYEEEL     | FKGPGDTSNFDDYEEEL                                                                | AURORA      | 0.9                       | 0.12886        |            | No                      |
| 420 | IPI00230005 | cAMP-dependent prote     | Prkaca;Prkaca;Prkaca;P     | Y331  | 1         | 13            | FKGPGDTSNFDDYEEEL   | FKGPGDTSNFDDYEEEL     | FKGPGDTSNFDDYEEEL                                                                | EGFR        |                           |                |            | Yes                     |
| 46  | IPI00230005 | cAMP-dependent prote     | Prkaca;Prkaca;Prkaca;P     | T196  | 1         | 1             | TWTLGCTPEYLAPEILSK  | T(ph)TWTLGCTPEYLAPE   | T(0.761)WT(0.198)LCG                                                             | FHA2 Rad53p | 0.8                       | 0.043057       | Down       | Yes                     |
| 146 | IPI00119575 | Putative uncharacterize  | Prkar1a;Prkar1a;Prkar1     | S212  | 1         | 9             | TDSREDEISPPPPNPVVK  | TDSREDEIS(ph)PPPPNP   | TDSREDEIS(1)PPPPNPVVK                                                            |             | 0.9                       | 0.28158        |            | Yes                     |
| 225 | IPI00224570 | cAMP-dependent prote     | Prkar2b                    | S112  | 1         | 3             | RASVCAEAYNPDEEEDD   | RAS(ph)VCAEAYNPDEE    | RAS(1)VCAEAYNPDEEEL                                                              | AURORA-A    | 1.0                       | 0.42244        |            | No                      |
| 316 | IPI00227880 | Protein kinase C delta t | Prkcd;Prkcd;Prkcd;Prkcd    | S530  | 1         | 2             | ASTFCGTPDYIAPEILQGL | AS(ph)TFCGTPDYIAPE    | AS(0.464)T(0.464)FCGT                                                            | PKA         |                           |                |            | Yes                     |
| 391 | IPI00227880 | Protein kinase C delta t | Prkcd;Prkcd;Prkcd;Prkcd    | T531  | 1         | 3             | ASTFCGTPDYIAPEILQGL | AS(ph)TFCGTPDYIAPE    | AS(0.464)T(0.464)FCGT                                                            | CAMK2       |                           |                |            | Yes                     |
| 262 | IPI00227880 | Protein kinase C delta t | Prkcd;Prkcd;Prkcd;Prkcd    | T535  | 1         | 7             | ASTFCGTPDYIAPEILQGL | ASTFCGTPDYIAPE        | AS(0.126)T(0.126)FCGT(0.623)PDY(0.126)IAPEI                                      | 1.1         | 0.45455                   |                | Yes        |                         |
| 125 | IPI00122069 | Protein kinase C gamm    | Prkcg;Prkcg;Prkcg;Prkcg    | T514  | 1         | 1             | TFCGTPDYIAPEIAYQPY  | T(ph)TFCGTPDYIAPEI    | T(0.906)FCGT(0.094)PDY(0.001)IAPEIAYQPY                                          | 0.9         | 0.23243                   |                | Yes        |                         |
| 115 | IPI00896672 | PRP4 pre-mRNA proces     | Prpf4b;mCG_22253;Pr        | Y849  | 1         | 18            | LCDFGSASHVADNDITPY  | LCDFGSASHVADNDIT      | LCDFGSASHVADNDIT(0.003)PY(0.824)LV(0.17)                                         | 0.9         | 0.21526                   |                | Yes        |                         |
| 305 | IPI00117124 | Presenilin-1;Protein S1  | Psen1;Ad3h;Psn1            | S365  | 1         | 7             | AAVQELSGILTSDEPEER  | AAVQELS(ph)GILTSE     | AAVQELS(0.467)GS(0.467)ILT(0.065)S(0.002)EDPEER                                  |             |                           |                |            | Yes                     |
| 306 | IPI00117124 | Presenilin-1;Protein S1  | Psen1;Ad3h;Psn1            | S367  | 1         | 9             | AAVQELSGILTSDEPEER  | AAVQELS(ph)GILTSE     | AAVQELS(0.467)GS(0.4                                                             | NEK6        |                           |                |            | Yes                     |
| 98  | IPI00224784 | Prothymosin alpha;Thy    | Ptma                       | S2    | 1         | 1             | SDAAVDTSSSEITTK     | (ca)S(ph)DAAVDTSSSE   | S(1)DAAVDTSSSEITTK                                                               |             | 0.9                       | 0.17808        |            | No                      |
| 67  | IPI00322145 | Protein tyrosine phosph  | Ptlad1                     | S114  | 1         | 5             | WLDESDAEMELR        | WLDES(ph)DAEMELR      | WLDES(1)DAEMELR                                                                  | CK2         | 0.8                       | 0.097036       |            | Yes                     |
| 307 | IPI00117689 | Polymerase I and trans   | Ptrf;Ptrf;Ptrf             | S38   | 1         | 6             | ATEEPPSGTGSDLEIKSDQ | ATEEPPSGTGSDLEI       | AT(0.045)EPPS(0.276)G                                                            | GSK3        |                           |                |            | Yes                     |
| 227 | IPI00117689 | Polymerase I and trans   | Ptrf;Ptrf;Ptrf             | S42   | 1         | 10            | ATEEPPSGTGSDLEIKSDQ | ATEEPPSGTGSDLEI       | ATEEPPSGTGSDLEI(0.068)GS(0                                                       | CK1         | 1.0                       | 0.42704        |            | No                      |
| 390 | IPI00117689 | Polymerase I and trans   | Ptrf;Ptrf;Ptrf             | T40   | 1         | 8             | ATEEPPSGTGSDLEIKSDQ | ATEEPPSGTGSDLEI       | AT(0.045)EPPS(0.276)G                                                            | FHA1 Rad53p |                           |                |            | No                      |
| 285 | IPI00416731 | R3H domain-containing    | R3hdm2;Kiaa1002;R3h        | S381  | 1         | 3             | ASSFSGISILTR        | ASS(ph)FGSILTR        | AS(0.031)S(0.969)FGS                                                             | PKD         | 1.0                       | 0.48969        |            | Yes                     |
| 259 | IPI00480432 | MKIAA0857 protein;Ra     | Rab11fip5;mKIAA0857        | S307  | 1         | 3             | TYSDEASQLR          | TYS(ph)DEASQLR        | TYS(1)DEASQLR                                                                    | PKA         | 1.0                       | 0.45312        |            | Yes                     |
| 304 | IPI00116031 | RNA-binding protein 1c   | Rbm10;Kiaa0122;Rbm         | S718  | 1         | 3             | LASDDRRSPPR         | LAS(ph)DDRRSPPR       | LAS(0.88)DDRRPS(0.12)                                                            | PKD         |                           |                |            | Yes                     |
| 140 | IPI00116031 | RNA-binding protein 1c   | Rbm10;Kiaa0122;Rbm         | S723  | 1         | 3             | LASDDRRSPPR         | LASDDRRSPPR           | LASDDRRPS(1)PPR                                                                  | CDK2        | 0.9                       | 0.27123        |            | Yes                     |
| 266 | IPI00340815 | Rbm15 protein            | Rbm15                      | S293  | 1         | 8             | SLSPGGAAALGYR       | SLS(ph)PGGAAALGYR     | S(0.111)LS(0.889)PGGA                                                            | CAMK2       | 1.1                       | 0.45957        |            | No                      |
| 208 | IPI00170394 | Splicing factor 45;45 kD | Rbm17;Spf45                | S155  | 1         | 6             | RPDPDSDEDEDYERER    | RPDPDS(ph)DEDEDYER    | RPDPDS(1)DEDEDYERER                                                              |             | 1.0                       | 0.39748        |            | Yes                     |
| 103 | IPI00223371 | RNA-binding protein 39   | Rbm39;Caper;Rnpc2;R        | S136  | 1         | 3             | DKSPVREPIDNLTPEER   | DKS(ph)PVREPIDNLTPE   | DKS(0.999)PVREPIDNLT                                                             | CDK2        | 0.9                       | 0.18712        |            | Yes                     |
| 138 | IPI00130160 | RNA-binding protein 5    | Rbm5;Luca15;Rbm5;Lu        | S624  | 1         | 10            | GLVAAVYSGDSNDEEELV  | GLVAAVYSGDS(ph)DNE    | GLVAAVYSGDS(1)DNEE                                                               | CK2         | 0.9                       | 0.26369        |            | Yes                     |
| 244 | IPI00124979 | Heterogeneous nuclear    | Rbmrx;RP23-372E6.2-0       | S208  | 1         | 5             | DVYLSPRDDGYSTK      | DVYLS(ph)PRDDGYSTK    | DVYLS(1)PRDDGYSTK                                                                | CDK1        | 1.0                       | 0.44582        |            | Yes                     |
| 361 | IPI00453982 | REST corepressor 3;RES   | Rcor3;Rcor3                | S15   | 1         | 15            | MPGMMEKGPPELLGSKR   | MPGMMEKGPPELLGSK      | MPGMMEKGPPELLGSKS(                                                               | NEK6        |                           |                |            | Yes                     |
| 6   | IPI00269129 | RING finger protein 22c  | Rnf220;Rnf220;Rnf220       | T474  | 1         | 1             | TCKNSDIEK           | (ca)T(ph)CKNSDIEK     | T(1)CKNSDIEK                                                                     |             | 5.6                       | 2.90E-12       | Up         | No                      |
| 120 | IPI00453849 | mRNA cap guanine-N7      | Rnmt;Kiaa0398;Rnmt;K       | S15   | 1         | 9             | ASVADSPESPGGNEPA    | ASVADSPES(ph)PPGGNE   | ASVADSPES(1)PPGGNE                                                               | ERK/MAPK    | 0.9                       | 0.22051        |            | Yes                     |
| 160 | IPI00869441 | Uncharacterized protei   | RP23-263M10.5;12000        | S25   | 1         | 13            | AEAPAGPALGLPSPEVES  | AEAPAGPALGLPS(ph)     | AEAPAGPALGLPS(1)PEVESGLER                                                        |             | 1.0                       | 0.30886        |            | Yes                     |
| 294 | IPI00110724 | 60S ribosomal protein    | Rpl22l1;Rpl22l1            | S118  | 1         | 11            | YFQISQDEEDGSESD     | YFQISQDEEDG(ph)ESE    | YFQISQDEEDG(0.986)E                                                              | CK2         |                           |                |            | Yes                     |
| 163 | IPI00113377 | 60S acidic ribosomal pr  | Rplp1                      | S101  | 1         | 4             | KEESESEDDMGFLGFD    | KEES(ph)EESEDDMGFL    | KEES(1)EESEDDMGFLG                                                               |             | 1.2                       | 0.31714        |            | No                      |
| 241 | IPI00755495 | 40S ribosomal protein    | Rps17                      | S133  | 1         | 6             | LLDFGSLSNLQVQTPTVG  | LLDFGSL(ph)LSNLQVTC   | LLDFGSL(0.855)LS(0.144)NLQVQTPTVGMNFK                                            | 1.1         | 0.43868                   |                | No         |                         |
| 185 | IPI00134599 | 40S ribosomal protein    | Rps3                       | T221  | 1         | 7             | DEILPTTPISEQK       | DEILPTT(ph)PISEQK     | DEILPT(0.001)T(0.999)                                                            | WW Group I  | 1.1                       | 0.34688        |            | Yes                     |
| 293 | IPI00113655 | 40S ribosomal protein    | Rps6;Rps6;Dcd5;RP23        | S236  | 1         | 4             | RLSLSL              | RLS(ph)LSL            | RLS(0.044)S(0.956)LR                                                             | PKA/AKT     |                           |                |            | Yes                     |
| 274 | IPI00849948 | 40S ribosomal protein    | Rps8;Rps8;OTTMUSG0         | S172  | 1         | 2             | ISLLLEEFQFQQGK      | IS(ph)SLLLEEFQFQQGK   | IS(0.5)S(0.5)SLLLEEFQFQQGK                                                       |             | 1.0                       | 0.4739         |            | No                      |
| 70  | IPI00849948 | 40S ribosomal protein    | Rps8;Rps8;OTTMUSG0         | S173  | 1         | 3             | ISLLLEEFQFQQGK      | ISS(ph)SLLLEEFQFQQGK  | IS(0.007)S(0.993)SLLLEEFQFQQGK                                                   | CK2         | 1.4                       | 0.1125         |            | Yes                     |

| No  | IPI Numbers | Protein Names             | Gene Names             | pAA   | Number of P | Position in p | Peptide Sequence    | Phospho (STY) Probabi  | Modified Sequence                                       | Best Motif  | Ratio <sup>1</sup> of Phd | Ratio Signifid | Up-/Down-r | Phosphosites Localized? |
|-----|-------------|---------------------------|------------------------|-------|-------------|---------------|---------------------|------------------------|---------------------------------------------------------|-------------|---------------------------|----------------|------------|-------------------------|
| 25  | IPI00411051 | Regulatory-associated     | Rptor;Raptor;Raptor;R  | S863  | 1           | 14            | ILDTSLLTQASAPASPTNK | ILDTSLLTQASAPAS(ph)    | ILDTSLLTQASAPAS(0.898)                                  | WW GroupIV  | 1.9                       | 0.0063455      | Up         | Yes                     |
| 214 | IPI00605227 | MKIAA0138 protein;Sc      | Safb2;mkIAA0138;Safb   | S459  | 1           | 7             | APTAALSPEPQDSKEDVK  | APTAALS(ph)PEPQDS      | APTAALS(1)PEPQDSKE                                      | CK1         | 1.1                       | 0.40438        | Yes        | Yes                     |
| 309 | IPI00605227 | MKIAA0138 protein;Sc      | Safb2;mkIAA0138;Safb   | S465  | 1           | 13            | APTAALSPEPQDSKEDVK  | APTAALS(ph)PEPQDS      | APT(0.008)AALS(0.496)PEPQDS(0.496)KEDVKK                |             |                           |                | Yes        | Yes                     |
| 218 | IPI00338954 | SAM and SH3 domain-c      | Sash1                  | S400  | 1           | 3             | TCSFGGFDLTNR        | TCS(ph)FGGFDLTNR       | T(0.011)CS(0.989)FGGF                                   | CAMK2       | 1.1                       | 0.41305        | No         | No                      |
| 52  | IPI00133030 | Protein transport prote   | Sec61b                 | S14   | 1           | 13            | PGPTPSGTNVGSSGRSP   | PGPTPSGTNVGSS(ph)      | PGPTPSGT(0.005)NVGS(0.123)S(0.727)GRS(0.1               |             | 0.8                       | 0.055439       | Yes        | Yes                     |
| 86  | IPI00114945 | Septin-2;Neural precu     | Sept2;Nedd-5;Nedd5     | S218  | 1           | 9             | IYHLPDAESEDEDFKFEQ  | IYHLPDAESE(ph)DEDE     | IYHLPDAESE(1)DEDEDFKFEQ                                 |             | 0.9                       | 0.15135        | Yes        | Yes                     |
| 389 | IPI00114945 | Septin-2;Neural precu     | Sept2;Nedd-5;Nedd5     | T228  | 1           | 19            | IYHLPDAESEDEDFKFEQ  | IYHLPDAESEDEDFKE       | IY(0.001)HLPDAESE(0.2)FHA2 Rad53p                       |             |                           |                | No         | No                      |
| 91  | IPI00923056 | Sept5 protein;Septin-5    | Sept5;Sept5;Pnut1;Se   | S225  | 1           | 13            | FGIHVYQFPECDSDEDED  | FGIHVYQFPECDS(ph)      | FGIHVY(0.004)QFPECDS(0.996)DEDED                        | FKQDDR      | 1.3                       | 0.15866        | Yes        | Yes                     |
| 97  | IPI00923056 | Sept5 protein;Septin-5    | Sept5;Sept5;Pnut1;Se   | Y218  | 1           | 6             | FGIHVYQFPECDSDEDED  | FGIHVYQFPECDSDEDED     | FGIHVY(0.712)QFPECDS                                    | ABL         | 0.9                       | 0.17799        | Yes        | Yes                     |
| 279 | IPI00457611 | Septin-9;SL3-3 integrat   | Sept9;Kiaa0991;Sint1;S | S585  | 1           | 9             | LVDSLSQRSQPKPSLR    | LVDSLSQRS(ph)PKPSL     | LVDSLS(0.001)QRS(0.99)CDK1                              |             | 1.0                       | 0.47803        | Yes        | Yes                     |
| 335 | IPI00903371 | Alpha-1 antitrypsin 1-6   | Serpina1f;Serpina1f;Se | S376  | 1           | 4             | KLGDMDMGR           | (ca)KLGS(ph)TDMGR      | KLGS(0.887)T(0.113)DMGR                                 |             |                           |                | No         | No                      |
| 178 | IPI00420807 | Splicing factor, arginine | Sfrs1                  | S199  | 1           | 8             | VKVDGPRSPSYGR       | VKVDGPRSP(ph)PSYGR     | VKVDGPRSP(0.999)PS(0.1                                  | WW GroupIV  | 1.0                       | 0.33939        | Yes        | Yes                     |
| 24  | IPI00848672 | Putative uncharacterize   | Sfrs11;mcCG_11658;Sfr  | S477  | 1           | 7             | RPTAEVAVPK          | RPTAEVAVS(ph)PK        | RPT(0.001)EAVS(0.999)CDK1                               |             | 0.7                       | 0.0053942      | Down       | Yes                     |
| 331 | IPI00310880 | Putative uncharacterize   | Sfrs6;mcCG_1675        | S303  | 1           | 3             | SHSLPAPPSK          | SHS(ph)PLPAPPSK        | S(0.014)HS(0.986)PLPA                                   | CAMK2       |                           |                | Yes        | Yes                     |
| 233 | IPI00120052 | Sphingosine-1-phospha     | Sgpp1;Spp1;Spph1       | S101  | 1           | 3             | RNSLTGEEGELVK       | RNS(ph)LTGEEGELVK      | RNS(0.997)LT(0.003)GE                                   | PKA/AKT     | 1.0                       | 0.43083        | Yes        | Yes                     |
| 203 | IPI00116331 | Small glutamine-rich te   | Sgta;Sgt;Sgta;Sgt      | T82   | 1           | 5             | APDRTPPSEEDSAEAEER  | APDRTP(ph)PSEEDSAE     | APDRTP(0.996)PSPS(0.00                                  | FHA GroupIV | 1.0                       | 0.38459        | Yes        | Yes                     |
| 45  | IPI00673176 | Signal-induced prolifer   | Sipa12;Kiaa0545;Sipa1  | S1461 | 1           | 6             | LMLPDSPLVEEGR       | LMLPDS(ph)PLVEEGR      | LMLPDS(1)PLVEEGR                                        | WW GroupIV  | 1.6                       | 0.04032        | Up         | Yes                     |
| 166 | IPI00454140 | MCG15924, isoform CR      | Skiv2l;Sk1;Stk19;mcG   | S253  | 1           | 3             | ASSLELDLVK          | ASS(ph)LELDLVK         | AS(0.003)S(0.997)LELD                                   | CHK1/2      | 1.1                       | 0.32536        | Yes        | Yes                     |
| 341 | IPI00622815 | Sodium/hydrogen exch      | Slc9a1;Slc9a1;Nhe1     | S697  | 1           | 3             | LDSPTLSR            | LDS(ph)PTLSR           | LDS(0.999)PT(0.001)LS                                   | GSK3        |                           |                | Yes        | Yes                     |
| 12  | IPI00622815 | Sodium/hydrogen exch      | Slc9a1;Slc9a1;Nhe1     | S707  | 1           | 3             | IGSDPLAYEYK         | IGS(ph)DPLAYEYK        | IGS(1)DPLAYEYK                                          | PKA/AKT     | 3.3                       | 1.18E-06       | Up         | Yes                     |
| 51  | IPI00622815 | Sodium/hydrogen exch      | Slc9a1;Slc9a1;Nhe1     | S790  | 1           | 20            | SKEPSSPGTDDVFTPGSS  | SKEPSSPGTDDVFTPGS      | SKEPSSPGTDDVFTPGS(CK1                                   |             | 0.8                       | 0.053925       | No         | No                      |
| 87  | IPI00109311 | Na(+)/H(+) exchange re    | Slc9a3r1;Nherf;Nherf1  | S283  | 1           | 1             | SASSDTSEELNSQDSPK   | S(ph)ASSDTSEELNSQD     | S(0.526)AS(0.237)S(0.2                                  | NEK6        | 1.3                       | 0.15281        | No         | No                      |
| 200 | IPI00127941 | Small acidic protein;Sid  | Smap;Sid2057           | S15   | 1           | 1             | SASPDDDLGSSNWEAAD   | S(ph)ASPPDDDLGSSNW     | S(0.69)AS(0.31)PDDDLGSSNWEAAD                           | ADLNGNEER   | 1.1                       | 0.37245        | No         | No                      |
| 428 | IPI00467181 | SWI/SNF-related matrix    | Smarcd3;Baf60c         | Y419  | 1           | 2             | GYVQDLLR            | GY(ph)VQDLLR           | GY(1)VQDLLR                                             |             |                           |                | No         | No                      |
| 133 | IPI00922961 | Sntb2 protein;Beta-2-s    | Sntb2;Sntb2;Sntb2      | S373  | 1           | 1             | SPSLGSDLTFATR       | S(ph)PSLGSDDLTFATR     | S(0.627)PS(0.373)LGSD                                   | CK1         | 0.9                       | 0.25377        | Yes        | Yes                     |
| 4   | IPI00922961 | Sntb2 protein;Beta-2-s    | Sntb2;Sntb2;Sntb2      | S88   | 1           | 7             | GPAGEASASPPVR       | GPAGEAS(ph)ASPPVR      | GPAGEAS(0.5)AS(0.5)PPVR                                 |             | 0.2                       | 1.21E-26       | Down       | Yes                     |
| 5   | IPI00922961 | Sntb2 protein;Beta-2-s    | Sntb2;Sntb2;Sntb2      | S90   | 1           | 9             | GPAGEASASPPVR       | GPAGEAS(ph)ASPPVR      | GPAGEAS(0.5)AS(0.5)PPVR                                 |             | 0.2                       | 1.21E-26       | Down       | Yes                     |
| 373 | IPI00620743 | Putative uncharacterize   | Srcap                  | S1178 | 2           | 2             | LSSPTLTGTR          | LS(ph)SPTLTGTR(ph)R    | LS(0.921)S(0.079)PTLG                                   | PKA         |                           |                | Yes        | Yes                     |
| 201 | IPI00605037 | Serine/arginine repetit   | Srrm1;Pop101;Srrm1;R   | S915  | 1           | 5             | KETESAEDDNLDDL      | KETES(ph)EAEDDNL       | KETES(1)EAEDDNL                                         | CK2         | 1.1                       | 0.37576        | Yes        | Yes                     |
| 283 | IPI00605037 | Serine/arginine repetit   | Srrm1;Pop101;Srrm1;R   | T913  | 1           | 3             | KETESAEDDNLDDL      | KET(ph)EAEEDDNL        | KET(0.999)ES(0.001)EA                                   | PKA         | 1.0                       | 0.48444        | Yes        | Yes                     |
| 277 | IPI00605037 | Serine/arginine repetit   | Srrm1;Pop101;Srrm1;R   | S260  | 1           | 14            | APKPEPVEPKEPSPK     | APKPEPVEPKEPSPS(ph)    | APKPEPVEPKEPSPS(1)PE                                    | CDK2        | 1.0                       | 0.47699        | Yes        | Yes                     |
| 64  | IPI00605037 | Serine/arginine repetit   | Srrm1;Pop101;Srrm1;R   | S463  | 1           | 7             | KVELSEEDKGSK        | KVELS(ph)EEDKGSK       | KVELS(0.069)ES(0.931)                                   | NEK6        | 1.5                       | 0.074988       | No         | Yes                     |
| 410 | IPI00605037 | Serine/arginine repetit   | Srrm1;Pop101;Srrm1;R   | T633  | 1           | 1             | TASPPPPPK           | T(ph)ASPPPPPK          | T(0.957)AS(0.043)PPPP                                   | PKA         |                           |                | Yes        | Yes                     |
| 222 | IPI00874854 | Srrm2 protein;Serine/a    | Srrm2;Srrm2;Kiaa0324   | S1068 | 1           | 3             | SSSPVTELTAR         | SSS(ph)PVTELTAR        | S(0.097)S(0.054)S(0.84                                  | CHK1/2      | 1.1                       | 0.41764        | Yes        | Yes                     |
| 242 | IPI00874854 | Srrm2 protein;Serine/a    | Srrm2;Srrm2;Kiaa0324   | S1151 | 1           | 4             | DKFSPQDRPESSTLVK    | DKFS(ph)PQDRPESST      | DKFS(0.103)PT(0.113)QDRPESSTLVK                         |             | 1.1                       | 0.44274        | Yes        | Yes                     |
| 32  | IPI00874854 | Srrm2 protein;Serine/a    | Srrm2;Srrm2;Kiaa0324   | S1305 | 1           | 13            | NSGPNVSEVNTGFSPEVK  | NSGPNVSEVNTGFS(ph)     | NSGPNVSEVNTGFS(1)PEVK                                   |             | 0.7                       | 0.018453       | Down       | No                      |
| 323 | IPI00874854 | Srrm2 protein;Serine/a    | Srrm2;Srrm2;Kiaa0324   | S1338 | 1           | 2             | RSSSELSPEVVEK       | RS(ph)SSELSPEVVEK      | RS(0.479)S(0.479)S(0.0                                  | PKA         |                           |                | Yes        | Yes                     |
| 111 | IPI00874854 | Srrm2 protein;Serine/a    | Srrm2;Srrm2;Kiaa0324   | S1339 | 1           | 3             | RSSSELSPEVVEK       | RSS(ph)SSELSPEVVEK     | RS(0.065)S(0.87)S(0.06                                  | PKA         | 1.3                       | 0.2066         | No         | Yes                     |
| 101 | IPI00874854 | Srrm2 protein;Serine/a    | Srrm2;Srrm2;Kiaa0324   | S1359 | 1           | 2             | VSSPVLETVQQR        | (ca)VS(ph)SPVLETVQ     | VS(0.893)S(0.095)PVLE                                   | CK1         | 0.9                       | 0.18575        | No         | Yes                     |
| 228 | IPI00874854 | Srrm2 protein;Serine/a    | Srrm2;Srrm2;Kiaa0324   | S1360 | 1           | 3             | VSSPVLETVQQR        | VSS(ph)PVLETVQQR       | VS(0.003)S(0.997)PVLE                                   | ERK/MAPK    | 1.1                       | 0.42719        | Yes        | Yes                     |
| 230 | IPI00874854 | Srrm2 protein;Serine/a    | Srrm2;Srrm2;Kiaa0324   | S2351 | 1           | 6             | VSGRTSPLMLDR        | VSGRTS(ph)PLMLDR       | VSGRT(0.003)S(0.997)P                                   | PKA         | 1.0                       | 0.42785        | No         | No                      |
| 280 | IPI00874854 | Srrm2 protein;Serine/a    | Srrm2;Srrm2;Kiaa0324   | S2404 | 1           | 19            | MVQASSQSLLPPAQDRP   | MVQASSQSLLPPAQDR       | MVQASSQSLLPPAQDR(ph)WW                                  | GroupIV     | 1.0                       | 0.48084        | No         | No                      |
| 177 | IPI00874854 | Srrm2 protein;Serine/a    | Srrm2;Srrm2;Kiaa0324   | T1153 | 1           | 6             | DKFSPQDRPESSTLVK    | DKFSPT(ph)QDRPESST     | DKFS(0.103)PT(0.673)QDRPES(0.103)T                      |             | 1.0                       | 0.33787        | No         | No                      |
| 273 | IPI00874854 | Srrm2 protein;Serine/a    | Srrm2;Srrm2;Kiaa0324   | T2350 | 1           | 1             | TSPLMLDR            | T(ph)SPLMLDR           | T(0.668)S(0.332)PLML                                    | CK1         | 1.0                       | 0.46977        | Yes        | Yes                     |
| 217 | IPI00874854 | Srrm2 protein;Serine/a    | Srrm2;Srrm2;Kiaa0324   | T973  | 1           | 5             | SMLQTPPDQNLGSGSK    | SMLQT(ph)PPDQNLGSG     | SMLQT(0.999)PPDQNL                                      | FHA1 Rad53p | 1.1                       | 0.41149        | No         | No                      |
| 248 | IPI00830670 | Sperm-specific antigen    | Ssfa2;Kiaa1927;Krap;S  | S736  | 1           | 1             | SQSLPTLLSPVR        | S(ph)QSLPTLLSPVR       | S(0.681)QS(0.319)LP                                     | NIMA        | 1.1                       | 0.44748        | No         | No                      |
| 289 | IPI00830670 | Sperm-specific antigen    | Ssfa2;Kiaa1927;Krap;S  | S90   | 1           | 6             | TPLGASLDEQSSGTPK    | TPLGAS(ph)LDEQSSG      | TPLGAS(1)LDEQSSGTPK                                     | CK2         | 1.0                       | 0.49506        | Yes        | Yes                     |
| 415 | IPI00114979 | Signal transducer and a   | Stat5a;Mgf;Mpf         | Y694  | 1           | 5             | AVDGYVVKPQIK        | AVDGY(ph)VKPQIK        | AVDGY(1)VKPQIK                                          | EGFR        |                           |                | No         | No                      |
| 416 | IPI00114982 | Signal transducer and a   | Stat5b                 | Y699  | 1           | 5             | AADGYVVKPQIK        | AADGY(ph)VKPQIK        | AADGY(1)VKPQIK                                          | EGFR        |                           |                | Yes        | Yes                     |
| 58  | IPI00330941 | Metalloenductase STEA     | Steap3;Tsap6;Steap3;T  | S58   | 1           | 8             | RLVSDSGSLAEVVK      | RLVSDSGS(ph)LAEVVK     | RLVSDSGS(1)LAEVVK                                       | PLK         | 0.8                       | 0.067213       | No         | No                      |
| 20  | IPI00831595 | Serine/threonine kinas    | Stk10;Stk10;Lok        | T950  | 1           | 11            | LSEAEPRPTTPSK       | LSEAEPRPTT(ph)PSK      | LSEAEPRPTT(0.002)T(0                                    | WW GroupIV  | 2.3                       | 0.0005873      | Up         | No                      |
| 151 | IPI00662157 | Synaptotaxin;Synapto      | Synpo;Kiaa1029;Synpo   | S535  | 1           | 6             | LLGQRSPLVLR         | LLGQRS(ph)PLVLR        | LLGQRS(1)PLVLR                                          |             | 1.2                       | 0.28975        | No         | No                      |
| 35  | IPI00110247 | TBC1 domain family me     | Tbc1d15                | S201  | 1           | 1             | SLSQSFENLLDEPAYGLIQ | S(ph)LSQSFENLLDEPA     | S(0.672)LS(0.163)QS(0                                   | GSK3        | 1.6                       | 0.031244       | Up         | Yes                     |
| 127 | IPI00453842 | TBC1 domain family me     | Tbc1d2b;Kiaa1055       | S959  | 1           | 11            | DTSPDKGELVSDSEEDT   | DTSPDKGELVS(ph)DEE     | DTSPDKGELVS(0.999)D                                     | CK2         | 0.9                       | 0.23432        | Yes        | No                      |
| 53  | IPI00930819 | Transcription elongatio   | Tcea1;Tceat;Tcea1;Tce  | S111  | 1           | 11            | KKEPAISSQNSPEAR     | KKEPAISSQNS(ph)PEA     | KKEPAISSQNS(1)PEAR                                      | CK1         | 1.0                       | 0.055527       | No         | No                      |
| 226 | IPI00828809 | Transcription factor E3   | Tcfe3;RP23-109E24.7-0  | S553  | 1           | 11            | AASDPLSSVSPAVSK     | AASDPLSSVSPAVS(ph)PAV  | AASDPLSSVSPAVS(0.013)VS(0                               | CK1         | 0.8                       | 0.42565        | No         | No                      |
| 173 | IPI00115660 | Treacle protein;Treach    | Tcof1;Tcof1            | S169  | 1           | 12            | SAEPLANTVLASETEEDI  | SAEPLANTVLAS(ph)ET     | SAEPLANTVLAS(0.889)E                                    | CK2         | 1.1                       | 0.33435        | Yes        | Yes                     |
| 255 | IPI00556768 | Thyroid hormone rece      | Thrap3;Trap150;Thrap   | S243  | 1           | 7             | ASVSDLSR            | ASVSDLS(ph)PR          | ASVSDLS(1)PR                                            | CDK1        | 1.1                       | 0.44928        | Yes        | Yes                     |
| 284 | IPI00556768 | Thyroid hormone rece      | Thrap3;Trap150;Thrap   | S679  | 1           | 4             | IDISPSTFR           | IDIS(ph)PSTFR          | IDIS(1)PSTFR                                            |             | 1.0                       | 0.48535        | Yes        | Yes                     |
| 370 | IPI00556768 | Thyroid hormone rece      | Thrap3;Trap150;Thrap   | S681  | 1           | 7             | RIDISPSTFR          | RIDIS(ph)PSTFR         | RIDIS(0.5)S(0.5)T(0.001)FR                              |             |                           |                | No         | No                      |
| 409 | IPI00556768 | Thyroid hormone rece      | Thrap3;Trap150;Thrap   | T682  | 1           | 7             | IDISPSTFRK          | IDIS(ph)PSTFRK         | IDIS(0.472)PS(0.056)T(CK1                               |             |                           |                | Yes        | Yes                     |
| 374 | IPI00674926 | Toll-like receptor 5      | Tlr5                   | S862  | 2           | 2             | SSSIQLRTIATIS       | (ca)SSS(ph)SIQLRTIATIS | S(0.124)S(0.789)S(0.08                                  | PKA         |                           |                | No         | No                      |
| 375 | IPI00674926 | Toll-like receptor 5      | Tlr5                   | S873  | 2           | 13            | SSSIQLRTIATIS       | (ca)SSS(ph)SIQLRTIATIS | S(0.124)S(0.789)S(0.087)IQLRT(0.014)IAT(0.014)IS(0.971) |             |                           |                | Yes        | Yes                     |
| 317 | IPI00896574 | Thymopietin;Thymop        | Tmpo;mcG_10339;Tm      | S157  | 1           | 1             | SSTPLPTVSSSAENR     | S(ph)STPLPTVSSSAEN     | S(0.477)S(0.262)T(0.26                                  | CK1         |                           |                | Yes        | Yes                     |
| 292 | IPI00121341 | Thioredoxin-related tra   | Tmx1;Txndc;Txndc1      | S245  | 1           | 13            | VEEQEAEEDVSEEEAE    | VEEQEAEEDVSE(ph)E      | VEEQEAEEDVSE(1)EE                                       | CK2         | 1.0                       | 0.5            | Yes        | Yes                     |
| 27  | IPI00459443 | 182 kDa tankyrase-1-b     | Tnks1bp1;Kiaa1741;Ta   | S1375 | 1           | 6             | SSGSLSPGLETEDEPLEAR | SSGSLS(ph)PGLTEDEP     | S(0.129)S(0.098)S(0.0                                   | CK1         | 1.8                       | 0.010412       | Up         | Yes                     |
